# Supplementary material for: CryoEM and AI reveal a structure of SARS-CoV-2 Nsp2, a multifunctional protein involved in key host processes
Source: bioRxiv preprint, doi:10.1101/2021.05.10.443524, version 1 (2021-05-11)
Supplement: Table with the thresholded and un-thresholded mass spectrometry results. [file 443524_file04.xlsx]

## Sheet: APMS_DDA_Unthresholded
Bait	Prey_Gene	Prey_Uniprot	SpectralCounts_Exp	SpectralCounts_Control	AvgSpec	FoldChange_Exp/Control	MIST	SaintScore	BFDR	InteractionScore	HighConfidence
nsp2_nature	NBDY	A0A0U1RRE5	0|1|2	3|0|2|3|2|0|0|3|1|2|1|3|3|2|1|1|2	1	0.59	0.199644	0.01	0.59	0.104822	FALSE
nsp2_nature	FAM168B	A1KXE4	1|1|0	1|0|0|0|0|1|0|0|1|2|1|0|1|1|1|1|1	0.67	1.03	0.215423	0	0.71	0.107711	FALSE
nsp2_nature	PGP	A6NDG6	6|5|4	2|3|6|4|5|4|4|5|6|3|3|3|8|5|5|5|3	5	1.15	0.342168	0	0.65	0.171084	FALSE
nsp2_nature	FBLL1	A6NHQ2	1|0|0	0|0|0|0|0|0|0|0|1|0|0|0|0|0|0|0|0	0.33	3.33	0.0423234	0	0.71	0.0211617	FALSE
nsp2_nature	C11orf98	E9PRG8	1|1|1	1|1|0|1|2|1|1|0|0|0|2|1|0|1|0|0|0	1	1.55	0.335533	0	0.71	0.167767	FALSE
nsp2_nature	MIEF1	L0R8F8	1|1|0	0|0|0|0|0|0|0|0|0|0|0|0|0|0|0|0|0	0.67	6.67	0.299578	0	0.71	0.149789	FALSE
nsp2_nature	KIF2A	O00139	1|0|2	0|0|0|0|0|0|0|1|1|0|0|0|0|0|2|0|0	1	4.25	0.220848	0.26	0.33	0.240424	FALSE
nsp2_nature	AIP	O00170	4|4|4	6|4|6|5|2|1|3|4|5|4|4|2|5|5|7|7|7	4	0.88	0.33446	0	0.71	0.16723	FALSE
nsp2_nature	GTPBP1	O00178	1|1|1	1|1|1|1|1|0|0|0|0|0|0|2|1|1|4|0|0	1	1.31	0.362422	0	0.71	0.181211	FALSE
nsp2_nature	ATOX1	O00244	5|4|6	4|3|4|8|3|4|4|5|3|1|0|8|5|7|5|7|5	5	1.12	0.333709	0	0.65	0.166855	FALSE
nsp2_nature	PGRMC1	O00264	3|2|4	0|0|0|0|0|0|0|0|0|0|0|0|0|0|0|0|0	3	30	0.354089	0.98	0	0.667044	FALSE
nsp2_nature	IPO5	O00410	1|1|2	0|0|0|0|0|0|0|0|0|0|0|0|0|0|0|0|0	1.33	13.33	0.311794	0.32	0.22	0.315897	FALSE
nsp2_nature	SAP18	O00422	1|0|0	0|1|1|0|0|0|0|0|1|0|0|0|0|0|0|0|0	0.33	1.89	0.0598052	0	0.71	0.0299026	FALSE
nsp2_nature	IGF2BP3	O00425	1|0|0	0|0|0|0|0|0|0|0|0|0|0|0|0|0|0|0|0	0.33	3.33	0.0142456	0	0.71	0.00712279	FALSE
nsp2_nature	PIK3C2A	O00443	0|0|1	0|0|0|0|0|0|0|0|1|0|0|0|0|0|0|0|0	0.33	3.33	0.0388254	0	0.71	0.0194127	FALSE
nsp2_nature	IFRD1	O00458	0|0|1	0|0|0|1|0|0|0|0|0|0|0|0|1|0|0|0|0	0.33	2.83	0.0355426	0	0.71	0.0177713	FALSE
nsp2_nature	HMGN4	O00479	3|2|3	1|2|1|2|2|2|3|1|0|2|3|2|1|1|2|0|1	2.67	1.74	0.330366	0.08	0.47	0.205183	FALSE
nsp2_nature	PES1	O00541	5|0|3	1|2|1|6|5|4|0|0|2|1|2|6|6|4|7|5|2	2.67	0.84	0.220123	0	0.61	0.110062	FALSE
nsp2_nature	NOP56	O00567	4|0|0	0|3|1|1|0|0|0|1|2|0|0|2|3|1|3|0|0	1.33	1.33	0.0124151	0.22	0.35	0.116208	FALSE
nsp2_nature	DDX3X	O00571	3|4|3	5|4|1|1|3|2|2|5|4|3|3|7|7|4|5|4|6	3.33	0.86	0.321818	0	0.66	0.160909	FALSE
nsp2_nature	GAPDHS	O14556	1|0|1	0|1|1|2|1|1|1|0|0|1|1|1|2|1|1|1|1	0.67	0.71	0.212695	0	0.71	0.106348	FALSE
nsp2_nature	IRS4	O14654	1|1|0	0|0|0|1|0|0|0|0|0|0|0|1|1|0|1|1|2	0.67	1.62	0.199654	0	0.71	0.0998268	FALSE
nsp2_nature	CHEK1	O14757	1|1|1	2|2|2|4|3|1|1|4|5|2|2|1|1|1|1|1|2	1	0.49	0.322941	0	0.71	0.161471	FALSE
nsp2_nature	MGST3	O14880	1|1|0	0|0|0|0|0|0|0|0|0|0|0|0|0|0|0|0|0	0.67	6.67	0.21408	0	0.71	0.10704	FALSE
nsp2_nature	UQCRQ	O14949	0|1|0	0|0|0|0|0|0|0|0|0|0|0|0|0|0|0|0|0	0.33	3.33	0.111775	0	0.71	0.0558873	FALSE
nsp2_nature	AURKA	O14965	4|4|3	0|1|1|2|2|0|3|1|1|0|0|1|1|1|0|0|1	3.67	4.16	0.373213	0.68	0.03	0.526606	FALSE
nsp2_nature	SLC27A2	O14975	6|6|2	0|0|0|0|0|0|0|0|0|0|0|0|0|0|0|0|0	4.67	46.67	0.915768	0.98	0	0.947884	TRUE
nsp2_nature	HNRNPDL	O14979	3|0|0	0|1|0|0|0|0|0|0|2|0|0|0|0|0|0|0|0	1	5.67	0.0904303	0.32	0.22	0.205215	FALSE
nsp2_nature	U2SURP	O15042	16|21|22	25|31|14|16|16|24|23|14|25|17|21|39|34|38|26|27|26	19.67	0.8	0.326307	0	0.71	0.163154	FALSE
nsp2_nature	ARPC3	O15145	2|2|2	2|1|0|1|0|1|0|1|1|0|1|0|0|0|0|1|0	2	3.78	0.369466	0.47	0.13	0.419733	FALSE
nsp2_nature	WDR46	O15213	1|0|0	0|0|0|0|0|0|0|0|0|0|0|0|0|0|0|0|0	0.33	3.33	0.15608	0	0.71	0.07804	FALSE
nsp2_nature	MRPS12	O15235	3|6|5	6|2|6|6|4|3|1|6|3|1|2|4|3|2|4|3|2	4.67	1.37	0.318936	0	0.6	0.159468	FALSE
nsp2_nature	HMGB3	O15347	4|0|13	2|6|3|14|9|4|1|0|3|8|5|15|10|11|17|12|2	5.67	0.79	0.172615	0	0.65	0.0863076	FALSE
nsp2_nature	EIF3H	O15372	0|0|1	0|0|0|1|0|0|0|0|0|0|0|1|1|0|1|1|1	0.33	0.94	0.0188549	0	0.71	0.00942743	FALSE
nsp2_nature	DHX15	O43143	2|0|0	0|0|1|1|0|0|0|0|1|0|1|4|3|0|6|0|0	0.67	0.67	0.01921	0.08	0.47	0.049605	FALSE
nsp2_nature	CYB5B	O43169	0|3|0	0|0|0|0|0|0|0|0|0|0|0|0|0|0|0|0|0	1	10	0.144625	0.33	0.19	0.237312	FALSE
nsp2_nature	PHGDH	O43175	6|6|3	1|2|5|2|0|1|1|1|2|1|0|4|2|4|6|6|6	5	1.93	0.311438	0.09	0.45	0.200719	FALSE
nsp2_nature	SART1	O43290	0|1|0	0|0|0|1|1|0|0|1|1|0|0|3|2|1|1|1|0	0.33	0.47	0.0182086	0	0.71	0.00910428	FALSE
nsp2_nature	HNRNPR	O43390	11|0|0	0|7|5|3|0|0|0|0|2|0|0|1|0|0|2|0|1	3.67	2.97	0.0585557	0.32	0.22	0.189278	FALSE
nsp2_nature	TXNL1	O43396	4|2|0	3|1|3|3|0|0|0|1|3|2|1|1|3|1|2|2|1	2	1.26	0.225507	0.1	0.45	0.162753	FALSE
nsp2_nature	OIP5	O43482	2|1|4	3|1|1|1|1|2|2|0|2|1|1|5|3|5|2|2|2	2.33	1.17	0.318111	0.03	0.53	0.174055	FALSE
nsp2_nature	DENR	O43583	1|0|1	1|0|0|4|1|2|0|0|1|0|0|7|3|2|4|5|1	0.67	0.37	0.207417	0	0.71	0.103709	FALSE
nsp2_nature	PRC1	O43663	2|1|0	0|0|3|1|1|0|0|2|0|1|0|1|1|1|2|1|0	1	1.21	0.225283	0.08	0.46	0.152642	FALSE
nsp2_nature	ZNF207	O43670	1|0|1	0|1|1|2|3|1|0|0|0|0|0|2|3|0|2|3|0	0.67	0.63	0.210238	0	0.71	0.105119	FALSE
nsp2_nature	BUB3	O43684	3|2|4	5|4|3|6|5|2|2|2|5|5|3|10|9|4|7|7|5	3	0.61	0.31772	0	0.71	0.15886	FALSE
nsp2_nature	TRAF3IP2	O43734	1|1|2	0|0|0|0|0|0|0|0|3|0|0|2|0|2|0|0|2	1.33	2.52	0.427943	0.17	0.39	0.298972	FALSE
nsp2_nature	NUDT21	O43809	2|1|3	1|2|2|4|2|2|1|1|0|2|2|6|6|6|5|5|2	2	0.69	0.31182	0	0.64	0.15591	FALSE
nsp2_nature	LANCL1	O43813	0|1|0	1|1|1|0|0|1|0|0|1|0|0|1|0|0|0|1|2	0.33	0.63	0.0435943	0	0.71	0.0217972	FALSE
nsp2_nature	IDH3B	O43837	4|2|1	2|3|4|3|2|1|1|1|2|4|3|1|1|1|2|1|1	2.33	1.2	0.308947	0.04	0.52	0.174473	FALSE
nsp2_nature	CALU	O43852	0|1|1	0|0|0|1|1|0|0|0|1|0|0|1|0|0|0|1|0	0.67	2.27	0.210566	0	0.71	0.105283	FALSE
nsp2_nature	SMARCA5	O60264	5|0|0	0|1|1|0|0|0|0|0|0|0|0|0|0|0|1|0|0	1.67	9.44	0.181314	0.33	0.18	0.255657	FALSE
nsp2_nature	SYNCRIP	O60506	4|0|0	0|5|4|1|0|0|0|0|1|0|0|1|0|0|6|0|0	1.33	1.26	0.0416599	0.21	0.37	0.12583	FALSE
nsp2_nature	GMDS	O60547	2|0|0	0|0|2|0|0|0|0|1|2|1|1|0|1|0|0|0|1	0.67	1.26	0.0377821	0.16	0.4	0.098891	FALSE
nsp2_nature	EIF4E2	O60573	10|9|12	0|0|0|0|0|0|0|0|0|0|0|0|0|0|0|0|0	10.33	103.33	0.806946	1	0	0.903473	TRUE
nsp2_nature	CTNND1	O60716	1|1|2	0|3|3|0|1|0|0|1|1|3|1|10|6|2|6|3|2	1.33	0.54	0.31239	0	0.71	0.156195	FALSE
nsp2_nature	PQBP1	O60828	0|0|1	0|0|0|2|0|0|0|0|0|0|0|4|3|3|4|1|0	0.33	0.33	0.0430584	0	0.71	0.0215292	FALSE
nsp2_nature	DKC1	O60832	3|0|1	1|2|1|1|1|1|0|0|2|0|1|0|0|0|0|1|0	1.33	2.06	0.187089	0.22	0.36	0.203544	FALSE
nsp2_nature	EIF5B	O60841	3|2|14	8|9|10|13|14|6|2|3|6|5|5|17|14|11|17|22|14	6.33	0.61	0.236097	0	0.7	0.118048	FALSE
nsp2_nature	EDF1	O60869	2|0|6	3|4|2|5|2|2|1|1|2|2|3|5|4|1|7|4|2	2.67	0.91	0.175118	0.02	0.55	0.0975588	FALSE
nsp2_nature	WDR1	O75083	0|0|1	0|0|0|0|0|0|0|0|0|0|0|0|0|0|0|0|0	0.33	3.33	0.122214	0	0.71	0.0611071	FALSE
nsp2_nature	GGCT	O75223	0|0|1	1|0|0|0|0|0|0|0|0|0|0|0|0|0|0|0|0	0.33	3.33	0.112535	0	0.71	0.0562677	FALSE
nsp2_nature	RTN2	O75298	1|0|0	1|0|0|0|0|0|0|0|0|0|0|0|0|0|0|0|0	0.33	3.33	0.148871	0	0.71	0.0744357	FALSE
nsp2_nature	PDCD6	O75340	4|2|5	3|4|8|7|4|4|4|3|5|4|3|4|7|4|4|5|5	3.67	0.8	0.319692	0	0.67	0.159846	FALSE
nsp2_nature	MACROH2A1	O75367	8|0|0	0|4|3|2|0|0|0|0|0|0|0|0|0|0|2|0|0	2.67	4.12	0.11863	0.32	0.21	0.219315	FALSE
nsp2_nature	NDUFS6	O75380	1|1|2	1|0|1|0|0|0|0|1|2|0|0|1|3|0|1|0|0	1.33	2.27	0.382803	0.14	0.41	0.261401	FALSE
nsp2_nature	PRPF40A	O75400	5|5|5	3|3|3|5|3|5|2|2|4|3|5|9|8|5|6|6|6	5	1.09	0.344918	0	0.66	0.172459	FALSE
nsp2_nature	PSIP1	O75475	2|1|1	1|1|2|4|1|0|0|2|0|1|1|3|2|0|4|2|1	1.33	0.91	0.336786	0.01	0.57	0.173393	FALSE
nsp2_nature	BANF1	O75531	8|0|0	2|2|3|4|0|0|0|0|0|0|0|0|0|0|3|0|1	2.67	3.02	0.0795697	0.32	0.21	0.199785	FALSE
nsp2_nature	SF3B1	O75533	1|0|0	1|1|1|1|0|1|1|1|2|0|3|7|9|3|2|7|5	0.33	0.13	0.00381017	0	0.71	0.00190509	FALSE
nsp2_nature	GCAT	O75600	0|1|0	0|0|0|0|0|0|0|0|0|0|1|0|0|0|1|2|0	0.33	1.42	0.0176804	0	0.71	0.00884019	FALSE
nsp2_nature	NPM3	O75607	2|0|0	0|0|0|0|0|0|0|0|0|0|0|1|0|0|0|0|0	0.67	6.67	0.122511	0.32	0.22	0.221255	FALSE
nsp2_nature	SNRNP200	O75643	2|0|0	0|0|0|0|0|0|0|0|0|0|0|1|2|0|2|3|2	0.67	1.13	0.038084	0.15	0.41	0.094042	FALSE
nsp2_nature	NUP155	O75694	5|2|1	5|1|2|1|2|2|1|1|4|5|2|4|6|5|2|2|5	2.67	0.91	0.285735	0	0.6	0.142868	FALSE
nsp2_nature	DNAJC8	O75937	3|2|10	3|2|1|9|5|3|1|1|2|4|3|10|11|8|11|6|2	5	1.04	0.270346	0	0.6	0.135173	FALSE
nsp2_nature	SMNDC1	O75940	6|3|5	3|4|3|4|5|5|1|2|3|2|3|6|7|6|7|5|4	4.67	1.13	0.331975	0	0.64	0.165988	FALSE
nsp2_nature	ATP5PD	O75947	2|1|0	0|0|0|0|0|0|0|0|0|0|0|0|0|0|0|0|0	1	10	0.216099	0.32	0.22	0.26805	FALSE
nsp2_nature	ATP5MG	O75964	0|1|1	0|0|0|0|0|0|0|0|0|0|0|0|0|0|0|0|0	0.67	6.67	0.241004	0	0.71	0.120502	FALSE
nsp2_nature	GLRX3	O76003	0|1|0	1|0|0|0|0|0|0|0|0|0|0|0|0|0|0|0|0	0.33	3.33	0.0465218	0	0.71	0.0232609	FALSE
nsp2_nature	RSL1D1	O76021	2|0|0	0|0|0|0|0|0|0|0|0|0|0|0|0|0|0|0|0	0.67	6.67	0.0096938	0.32	0.22	0.164847	FALSE
nsp2_nature	CLPX	O76031	1|1|1	0|1|0|1|1|0|0|0|0|1|0|2|1|1|2|1|0	1	1.55	0.359849	0	0.71	0.179924	FALSE
nsp2_nature	PLPBP	O94903	5|5|4	7|6|4|4|3|3|4|4|4|5|6|3|3|3|3|3|3	4.67	1.17	0.336501	0	0.65	0.168251	FALSE
nsp2_nature	ERLIN2	O94905	0|1|0	0|0|0|0|0|0|0|0|0|0|0|0|0|0|0|0|0	0.33	3.33	0.0299279	0	0.71	0.014964	FALSE
nsp2_nature	ZRANB2	O95218	1|1|1	0|0|2|0|0|0|0|0|0|0|0|4|4|1|1|2|0	1	1.21	0.391629	0	0.71	0.195815	FALSE
nsp2_nature	LUC7L3	O95232	18|13|19	18|19|18|21|25|18|17|18|21|8|14|21|20|18|22|20|21	16.67	0.89	0.326298	0	0.71	0.163149	FALSE
nsp2_nature	VAPB	O95292	1|1|0	0|0|0|0|0|0|0|0|0|0|0|0|0|0|0|0|0	0.67	6.67	0.360008	0	0.71	0.180004	FALSE
nsp2_nature	PGLS	O95336	1|2|0	1|0|0|0|1|1|0|1|2|2|7|0|2|0|0|1|0	1	0.94	0.197348	0.06	0.48	0.128674	FALSE
nsp2_nature	LYPLA2	O95372	2|3|2	2|2|3|2|0|0|0|0|0|0|0|0|0|1|1|2|1	2.33	2.83	0.352375	0.35	0.16	0.351187	FALSE
nsp2_nature	PSMG1	O95456	0|1|0	0|0|0|0|0|0|0|0|0|0|1|0|0|0|0|0|0	0.33	3.33	0.0468323	0	0.71	0.0234161	FALSE
nsp2_nature	HSPA4L	O95757	0|0|1	0|0|0|0|0|0|0|1|0|0|0|0|0|0|0|0|0	0.33	3.33	0.00616647	0	0.71	0.00308323	FALSE
nsp2_nature	TTC4	O95801	1|1|1	0|0|0|0|0|0|0|0|0|0|0|2|0|0|0|0|0	1	8.5	0.494851	0	0.71	0.247426	FALSE
nsp2_nature	TXNDC12	O95881	6|5|5	5|5|7|5|5|4|2|6|4|4|3|3|6|3|4|5|6	5.33	1.18	0.340917	0	0.65	0.170458	FALSE
nsp2_nature	NDUFB10	O96000	1|0|0	0|0|0|0|0|0|0|0|0|0|0|0|0|0|0|0|0	0.33	3.33	0.0174929	0	0.71	0.00874643	FALSE
nsp2_nature	TOMM40	O96008	1|0|0	0|0|0|0|0|0|0|0|0|0|0|0|0|0|0|0|0	0.33	3.33	0.0576042	0	0.71	0.0288021	FALSE
nsp2_nature	COX2	P00403	3|2|4	0|0|0|0|0|0|0|0|0|0|0|0|0|0|0|1|0	3	30	0.390513	0.98	0	0.685257	FALSE
nsp2_nature	SOD1	P00441	2|2|3	3|1|1|0|0|0|0|0|1|1|0|2|2|1|1|0|1	2.33	2.83	0.410567	0.35	0.16	0.380283	FALSE
nsp2_nature	HPRT1	P00492	6|4|6	2|3|3|2|1|2|1|2|4|2|2|4|6|2|1|4|3	5.33	2.06	0.353805	0.11	0.44	0.231902	FALSE
nsp2_nature	PGK1	P00558	2|3|2	1|2|1|2|3|0|0|0|1|1|2|3|1|1|1|0|1	2.33	1.98	0.342991	0.15	0.41	0.246495	FALSE
nsp2_nature	ATP6	P00846	1|1|1	0|0|0|0|0|0|0|0|0|0|0|0|0|0|0|1|0	1	10	0.416246	0	0.71	0.208123	FALSE
nsp2_nature	LMNA	P02545	2|1|0	0|0|1|1|0|0|0|0|1|0|0|2|1|1|1|1|1	1	1.7	0.309238	0.14	0.42	0.224619	FALSE
nsp2_nature	ALDOA	P04075	0|1|1	1|1|1|1|2|0|0|1|2|0|1|5|4|3|3|2|2	0.67	0.39	0.217726	0	0.71	0.108863	FALSE
nsp2_nature	CSTB	P04080	6|7|6	5|7|6|4|5|5|5|6|8|3|5|5|3|5|5|5|6	6.33	1.22	0.32942	0	0.66	0.16471	FALSE
nsp2_nature	KRT1	P04264	1|1|1	0|0|0|0|1|0|0|0|0|0|0|0|0|1|1|2|1	1	2.83	0.409116	0	0.71	0.204558	FALSE
nsp2_nature	GAPDH	P04406	5|7|11	7|6|3|4|2|3|3|4|7|2|4|7|4|7|4|8|8	7.67	1.57	0.333487	0.02	0.54	0.176744	FALSE
nsp2_nature	RPN1	P04843	3|4|6	0|0|0|0|0|0|0|0|0|0|0|0|0|0|1|0|0	4.33	43.33	0.312155	1	0	0.656078	FALSE
nsp2_nature	RPN2	P04844	2|3|3	0|0|0|0|0|0|0|0|0|0|0|0|0|0|0|0|0	2.67	26.67	0.322952	0.98	0	0.651476	FALSE
nsp2_nature	ATP1A1	P05023	2|2|4	0|0|0|0|0|0|0|0|1|0|0|2|1|0|1|1|2	2.67	5.67	0.300496	0.67	0.03	0.485248	FALSE
nsp2_nature	HMGN1	P05114	4|2|2	1|4|4|6|6|0|1|2|3|2|4|6|7|1|7|4|1	2.67	0.77	0.314346	0	0.65	0.157173	FALSE
nsp2_nature	SLC25A5	P05141	6|7|8	3|4|4|5|3|2|4|3|5|0|0|8|7|7|7|8|6	7	1.57	0.323515	0	0.61	0.161758	FALSE
nsp2_nature	PCCA	P05165	10|10|7	24|29|17|10|11|21|24|7|29|21|21|36|40|41|12|12|14	9	0.41	0.317554	0	0.71	0.158777	FALSE
nsp2_nature	PCCB	P05166	2|2|1	18|20|6|5|6|19|18|4|27|16|13|27|26|31|11|13|14	1.67	0.1	0.298337	0	0.71	0.149169	FALSE
nsp2_nature	EIF2S1	P05198	0|0|2	0|0|0|3|0|0|0|0|0|0|0|6|2|2|7|6|1	0.67	0.42	0.0261188	0.01	0.56	0.0180594	FALSE
nsp2_nature	HMGN2	P05204	9|11|9	4|3|7|8|6|5|6|7|9|9|5|12|10|5|10|3|10	9.67	1.38	0.332909	0	0.67	0.166455	FALSE
nsp2_nature	RPLP1	P05386	1|0|0	1|2|1|1|0|0|0|0|4|0|0|0|0|0|1|0|0	0.33	0.57	0.00613885	0	0.71	0.00306942	FALSE
nsp2_nature	RPLP2	P05387	9|0|0	2|8|5|6|0|1|0|0|6|1|2|0|0|0|2|0|0	3	1.55	0.0194665	0.27	0.32	0.144733	FALSE
nsp2_nature	RPLP0	P05388	2|0|0	0|2|1|2|0|0|0|0|1|0|0|0|0|0|0|0|0	0.67	1.89	0.0187973	0.22	0.36	0.119399	FALSE
nsp2_nature	CDK1	P06493	0|1|2	0|0|0|0|0|0|0|0|2|1|2|6|3|1|3|1|0	1	0.89	0.20436	0.05	0.5	0.12718	FALSE
nsp2_nature	ATP5F1B	P06576	21|24|21	4|4|8|5|4|2|2|2|2|2|3|9|7|7|9|7|12	22	4.2	0.368597	0.99	0	0.679299	FALSE
nsp2_nature	ENO1	P06733	5|8|8	12|7|7|8|7|4|6|4|6|4|5|12|9|8|5|6|5	7	1.03	0.324876	0	0.68	0.162438	FALSE
nsp2_nature	NPM1	P06748	14|3|3	4|15|14|15|2|0|0|1|10|3|2|6|5|2|9|3|2	6.67	1.22	0.27669	0.03	0.53	0.153345	FALSE
nsp2_nature	H1-0	P07305	4|0|0	1|2|3|1|1|0|0|0|1|0|0|0|0|0|1|0|0	1.33	2.27	0.0394321	0.3	0.3	0.169716	FALSE
nsp2_nature	ANXA2	P07355	2|2|3	2|2|2|2|0|2|1|1|2|2|1|6|3|2|4|2|1	2.33	1.13	0.35177	0.01	0.59	0.180885	FALSE
nsp2_nature	TUBB	P07437	4|4|6	5|4|7|3|6|2|2|5|4|2|3|8|5|5|6|4|5	4.67	1.04	0.316246	0	0.65	0.158123	FALSE
nsp2_nature	PFN1	P07737	1|1|2	1|1|2|1|2|1|1|0|1|0|1|2|0|1|1|1|1	1.33	1.33	0.349587	0.05	0.49	0.199794	FALSE
nsp2_nature	CTSB	P07858	0|1|0	0|0|0|0|0|0|0|0|1|0|0|0|0|0|0|0|0	0.33	3.33	0.127083	0	0.71	0.0635416	FALSE
nsp2_nature	HSP90AA1	P07900	0|0|2	0|0|0|1|0|0|0|1|0|0|0|1|1|0|0|0|1	0.67	2.27	0.0284693	0.24	0.34	0.134235	FALSE
nsp2_nature	HNRNPC	P07910	8|0|0	0|7|7|3|0|0|1|0|6|0|0|1|0|0|2|0|0	2.67	1.68	0.0362096	0.27	0.32	0.153105	FALSE
nsp2_nature	UQCRH	P07919	0|1|0	0|0|0|0|1|0|0|0|0|0|0|0|0|1|1|2|1	0.33	0.94	0.036101	0	0.71	0.0180505	FALSE
nsp2_nature	HSP90AB1	P08238	3|2|3	1|1|0|2|1|1|1|0|1|0|0|2|1|1|2|2|2	2.67	2.52	0.346068	0.29	0.31	0.318034	FALSE
nsp2_nature	PDHA1	P08559	0|1|0	0|0|0|0|0|0|0|0|0|0|0|1|2|1|0|1|1	0.33	0.94	0.0258169	0	0.71	0.0129084	FALSE
nsp2_nature	SNRPB2	P08579	1|0|1	0|1|1|1|1|0|1|1|1|0|0|1|2|0|1|0|0	0.67	1.03	0.210715	0	0.71	0.105358	FALSE
nsp2_nature	SNRNP70	P08621	4|0|1	0|1|0|9|0|0|0|0|0|0|0|3|3|0|7|1|0	1.67	1.18	0.245874	0.15	0.41	0.197937	FALSE
nsp2_nature	VIM	P08670	21|0|0	1|12|12|16|0|0|1|0|8|0|0|1|1|1|13|1|1	7	1.75	0.0260605	0.3	0.3	0.16303	FALSE
nsp2_nature	RPS17	P08708	12|12|8	15|13|13|16|12|9|7|12|14|8|6|16|17|14|18|13|11	10.67	0.85	0.32204	0	0.71	0.16102	FALSE
nsp2_nature	RPSA	P08865	5|7|3	7|3|6|10|3|4|4|7|6|6|4|3|8|4|6|9|6	5	0.89	0.308221	0	0.67	0.154111	FALSE
nsp2_nature	SNRPA	P09012	1|0|0	0|0|1|3|0|0|0|0|0|0|0|1|1|1|3|1|0	0.33	0.52	0.0424148	0	0.71	0.0212074	FALSE
nsp2_nature	SNRPC	P09234	2|0|0	0|0|2|1|0|0|0|0|0|0|0|1|2|0|2|1|1	0.67	1.13	0.0584029	0.14	0.42	0.0992014	FALSE
nsp2_nature	HMGB1	P09429	8|5|10	12|10|7|18|12|5|7|4|11|7|7|9|12|12|13|13|10	7.67	0.77	0.316735	0	0.7	0.158368	FALSE
nsp2_nature	HNRNPA1	P09651	7|1|2	3|7|7|7|0|1|0|1|6|0|0|1|1|0|5|0|1	3.33	1.42	0.269433	0.14	0.42	0.204716	FALSE
nsp2_nature	SNRPA1	P09661	0|0|1	0|2|1|2|1|1|1|1|1|1|2|3|2|3|3|2|1	0.33	0.21	0.0122951	0	0.71	0.00614757	FALSE
nsp2_nature	COX6C	P09669	1|1|2	0|0|0|0|0|0|0|0|0|0|0|0|0|0|0|0|0	1.33	13.33	0.349627	0.32	0.22	0.334813	FALSE
nsp2_nature	PARP1	P09874	51|30|59	31|42|33|61|47|31|14|30|32|34|29|61|56|49|61|55|51	46.67	1.11	0.327341	0	0.71	0.163671	FALSE
nsp2_nature	PET100	P0DJ07	1|0|0	0|0|0|0|0|0|0|0|0|0|0|1|1|1|1|1|1	0.33	0.94	0.053741	0	0.71	0.0268705	FALSE
nsp2_nature	POLR1D	P0DPB5	0|0|1	1|0|0|1|1|1|1|1|1|0|0|3|3|0|1|3|1	0.33	0.31	0.0133202	0	0.71	0.00666008	FALSE
nsp2_nature	H1-4	P10412	3|2|0	0|1|4|0|0|0|0|0|3|0|0|1|1|0|3|0|0	1.67	2.18	0.240456	0.31	0.29	0.275228	FALSE
nsp2_nature	TXN	P10599	11|10|10	8|7|12|8|10|5|7|8|10|5|9|13|11|8|10|11|10	10.33	1.16	0.331248	0	0.69	0.165624	FALSE
nsp2_nature	COX5B	P10606	2|2|1	0|0|0|0|0|0|0|0|0|0|0|0|0|0|0|0|0	1.67	16.67	0.409766	0.64	0.08	0.524883	FALSE
nsp2_nature	HSPD1	P10809	11|13|12	12|8|8|3|5|4|6|6|13|12|12|21|15|13|9|13|14	12	1.17	0.326345	0	0.7	0.163172	FALSE
nsp2_nature	HSPA5	P11021	52|50|55	15|11|10|11|12|10|12|7|11|12|10|14|13|8|14|13|15	52.33	4.49	0.354189	1	0	0.677095	FALSE
nsp2_nature	HSPA8	P11142	34|36|39	22|15|22|24|23|9|12|19|21|11|14|16|18|17|26|29|30	36.33	1.88	0.332139	0	0.69	0.166069	FALSE
nsp2_nature	TOP1	P11387	19|10|8	11|12|16|13|12|10|10|7|10|5|8|11|11|9|14|11|10	12.33	1.16	0.320448	0	0.68	0.160224	FALSE
nsp2_nature	TOP2A	P11388	2|0|0	0|0|0|1|0|0|0|0|0|0|0|0|0|0|0|0|0	0.67	6.67	0.0702684	0.32	0.22	0.195134	FALSE
nsp2_nature	PC	P11498	76|92|84	88|80|55|48|44|63|67|42|86|64|68|74|82|75|53|47|53	84	1.31	0.335391	0	0.71	0.167695	FALSE
nsp2_nature	MTHFD1	P11586	8|4|2	8|3|8|9|2|2|2|2|7|7|5|10|7|7|8|7|2	4.67	0.83	0.297069	0	0.67	0.148534	FALSE
nsp2_nature	PABPC1	P11940	1|0|0	0|0|0|0|0|0|0|0|0|0|0|0|0|0|0|0|0	0.33	3.33	0.0161039	0	0.71	0.00805194	FALSE
nsp2_nature	SLC25A6	P12236	0|1|3	2|2|2|2|2|1|1|2|1|1|2|2|1|1|3|2|2	1.33	0.78	0.172912	0.02	0.54	0.096456	FALSE
nsp2_nature	TPR	P12270	2|1|1	1|1|0|0|2|1|1|1|1|1|1|1|0|0|1|0|1	1.33	1.74	0.335215	0.1	0.45	0.217608	FALSE
nsp2_nature	CKB	P12277	0|1|4	0|0|1|1|0|0|0|0|0|1|0|1|0|0|0|0|0	1.67	7.08	0.38221	0.33	0.21	0.356105	FALSE
nsp2_nature	XRCC6	P12956	5|0|0	0|7|2|5|0|1|0|0|1|0|0|0|0|0|2|0|0	1.67	1.57	0.0503161	0.24	0.34	0.145158	FALSE
nsp2_nature	XRCC5	P13010	4|0|0	0|6|0|3|0|0|0|0|0|0|0|0|0|0|0|0|0	1.33	2.52	0.0501115	0.28	0.31	0.165056	FALSE
nsp2_nature	COX4I1	P13073	3|3|1	0|0|0|0|0|0|0|0|0|0|0|0|0|0|0|0|0	2.33	23.33	0.370235	0.66	0.04	0.515118	FALSE
nsp2_nature	EEF2	P13639	7|8|16	13|14|8|10|8|3|7|9|8|3|6|13|14|13|10|18|10	10.33	1.05	0.313504	0	0.68	0.156752	FALSE
nsp2_nature	PDIA4	P13667	1|1|0	2|0|0|0|0|0|0|0|0|0|1|0|1|0|1|1|0	0.67	1.89	0.202413	0	0.71	0.101207	FALSE
nsp2_nature	PLS3	P13797	1|2|2	3|2|3|1|2|2|1|1|3|3|2|1|2|3|1|1|1	1.67	0.89	0.31117	0.01	0.59	0.160585	FALSE
nsp2_nature	MTHFD2	P13995	2|2|0	0|0|0|0|1|0|0|0|0|0|0|0|0|1|1|1|1	1.33	4.53	0.219807	0.48	0.13	0.349904	FALSE
nsp2_nature	MIF	P14174	2|2|2	3|3|1|2|2|3|4|1|2|1|2|1|2|2|0|0|1	2	1.13	0.333508	0.01	0.56	0.171754	FALSE
nsp2_nature	COX7A2	P14406	2|2|0	0|0|0|0|0|0|0|0|0|0|0|0|0|0|0|0|0	1.33	13.33	0.380742	0.64	0.08	0.510371	FALSE
nsp2_nature	PKM	P14618	5|3|2	8|3|1|3|0|1|2|2|3|4|2|14|13|8|1|6|4	3.33	0.76	0.312882	0	0.66	0.156441	FALSE
nsp2_nature	HNRNPL	P14866	20|1|0	5|13|11|7|1|0|1|1|10|1|1|4|3|3|12|2|2	7	1.55	0.104471	0.3	0.3	0.202235	FALSE
nsp2_nature	GSPT1	P15170	0|1|1	0|0|0|0|0|0|0|0|0|0|0|0|1|0|1|1|1	0.67	2.83	0.496257	0	0.71	0.248129	FALSE
nsp2_nature	RPS2	P15880	10|6|6	7|7|6|10|8|4|5|4|8|3|4|6|6|6|6|4|5	7.33	1.26	0.324038	0	0.65	0.162019	FALSE
nsp2_nature	COX7C	P15954	1|1|1	0|0|0|0|0|0|0|0|0|0|0|0|0|0|0|0|0	1	10	0.442464	0	0.71	0.221232	FALSE
nsp2_nature	H2AX	P16104	3|0|0	1|1|0|0|0|0|0|0|0|0|0|0|0|0|0|0|0	1	8.5	0.135372	0.33	0.21	0.232686	FALSE
nsp2_nature	CBR1	P16152	9|7|7	7|8|6|6|8|3|5|5|8|5|6|11|9|9|9|8|9	7.67	1.07	0.340711	0	0.68	0.170355	FALSE
nsp2_nature	H1-3	P16402	2|0|0	1|2|2|1|0|0|1|0|1|0|0|0|0|0|1|0|0	0.67	1.26	0.0328919	0.16	0.4	0.0964459	FALSE
nsp2_nature	H1-2	P16403	4|3|4	3|7|6|4|4|5|2|2|5|3|4|4|4|0|3|1|1	3.67	1.07	0.33113	0	0.64	0.165565	FALSE
nsp2_nature	POR	P16435	3|3|4	0|0|0|0|0|0|0|0|0|0|0|0|0|0|0|0|0	3.33	33.33	0.711331	0.99	0	0.850665	TRUE
nsp2_nature	ATP2A2	P16615	1|0|0	0|0|0|0|0|0|0|0|0|0|0|0|0|0|0|0|0	0.33	3.33	0.00153555	0	0.71	0.000767777	FALSE
nsp2_nature	HMGA1	P17096	2|1|1	3|3|1|4|1|2|2|1|5|1|1|3|1|2|3|3|2	1.33	0.6	0.313039	0	0.71	0.15652	FALSE
nsp2_nature	UBTF	P17480	3|0|0	0|0|0|0|0|0|0|0|0|0|0|0|0|0|0|0|0	1	10	0.106979	0.33	0.19	0.21849	FALSE
nsp2_nature	CTPS1	P17812	6|5|2	3|4|5|5|5|2|1|1|4|5|1|0|4|3|3|4|5	4.33	1.34	0.310657	0.01	0.57	0.160328	FALSE
nsp2_nature	DDX5	P17844	12|12|10	10|10|14|9|12|11|8|10|10|6|7|11|7|9|12|7|5	11.33	1.22	0.330608	0	0.69	0.165304	FALSE
nsp2_nature	PFKL	P17858	0|1|0	0|0|0|0|0|0|0|0|0|0|0|0|0|1|0|0|0	0.33	3.33	0.0046454	0	0.71	0.0023227	FALSE
nsp2_nature	TCP1	P17987	4|5|4	0|0|1|2|2|0|0|0|1|2|1|5|7|3|7|9|11	4.33	1.44	0.33343	0.01	0.57	0.171715	FALSE
nsp2_nature	RPL35A	P18077	3|0|0	0|0|1|0|0|0|0|0|1|0|0|0|0|0|0|0|0	1	8.5	0.0300951	0.33	0.21	0.180048	FALSE
nsp2_nature	RPL7	P18124	5|0|0	1|2|3|3|0|0|1|0|5|1|1|0|0|0|1|0|0	1.67	1.57	0.0179352	0.25	0.33	0.133968	FALSE
nsp2_nature	SON	P18583	1|0|0	0|0|0|0|0|0|0|0|0|0|0|0|0|0|0|0|0	0.33	3.33	0.133012	0	0.71	0.0665062	FALSE
nsp2_nature	RPL17	P18621	10|7|9	6|6|5|6|5|4|2|5|7|7|8|8|5|4|7|5|9	8.67	1.49	0.33821	0	0.64	0.169105	FALSE
nsp2_nature	RCC1	P18754	2|1|0	1|1|2|2|0|1|0|0|1|0|1|1|0|1|2|0|0	1	1.31	0.22642	0.1	0.45	0.16321	FALSE
nsp2_nature	ATP5PF	P18859	1|1|2	0|0|0|0|0|0|0|0|0|0|0|0|0|0|0|1|1	1.33	11.33	0.348613	0.31	0.29	0.329307	FALSE
nsp2_nature	NCL	P19338	21|0|2	1|14|9|13|0|0|0|0|8|0|0|4|0|0|12|0|0	7.67	2.14	0.124156	0.31	0.3	0.217078	FALSE
nsp2_nature	EIF2S2	P20042	0|0|4	0|0|0|3|0|0|0|0|0|0|0|6|7|4|6|4|0	1.33	0.76	0.0799407	0.07	0.47	0.0749703	FALSE
nsp2_nature	BTF3	P20290	0|1|4	0|1|1|4|3|0|0|0|0|1|0|6|5|4|9|4|5	1.67	0.66	0.176328	0.01	0.58	0.0931638	FALSE
nsp2_nature	COX5A	P20674	1|2|1	0|0|0|0|0|0|0|0|0|0|0|0|0|0|0|0|0	1.33	13.33	0.361575	0.32	0.22	0.340788	FALSE
nsp2_nature	LMNB1	P20700	27|28|24	3|9|6|4|1|1|0|0|9|0|0|6|3|6|17|3|8	26.33	5.89	0.427665	0.97	0	0.698833	FALSE
nsp2_nature	HOXA5	P20719	1|2|1	1|0|0|0|1|0|0|0|1|1|0|0|0|1|0|0|0	1.33	4.53	0.367355	0.24	0.34	0.303677	FALSE
nsp2_nature	MDK	P21741	3|4|3	4|0|4|3|3|2|2|1|4|0|0|3|3|0|3|2|2	3.33	1.57	0.339706	0.03	0.53	0.184853	FALSE
nsp2_nature	VDAC1	P21796	4|3|4	0|0|0|0|0|0|0|0|0|0|0|1|0|0|0|0|0	3.67	36.67	0.332146	1	0	0.666073	FALSE
nsp2_nature	PCMT1	P22061	17|16|17	16|14|18|20|22|14|13|17|20|7|16|20|20|20|23|23|24	16.67	0.92	0.331081	0	0.71	0.165541	FALSE
nsp2_nature	FBL	P22087	6|4|4	1|3|4|5|1|1|0|1|2|1|0|2|1|2|5|2|0	4.67	2.56	0.340461	0.31	0.3	0.325231	FALSE
nsp2_nature	GART	P22102	2|4|3	4|2|7|4|1|3|2|3|4|0|0|6|5|4|4|7|8	3	0.8	0.310809	0	0.66	0.155405	FALSE
nsp2_nature	PAICS	P22234	0|1|0	1|0|0|0|0|0|0|0|1|1|0|0|1|0|0|0|0	0.33	1.42	0.0377289	0	0.71	0.0188645	FALSE
nsp2_nature	UBA1	P22314	1|0|0	0|0|0|0|1|0|0|0|1|1|0|3|6|1|0|0|2	0.33	0.38	0.0211813	0	0.71	0.0105906	FALSE
nsp2_nature	HNRNPA2B1	P22626	29|1|2	9|28|26|26|0|2|4|1|21|2|1|2|2|0|16|0|1	10.67	1.29	0.149091	0.17	0.4	0.159545	FALSE
nsp2_nature	UQCRC2	P22695	4|5|6	0|0|0|0|0|0|0|0|0|0|0|0|0|0|0|0|0	5	50	0.402543	1	0	0.701271	FALSE
nsp2_nature	TCEA1	P23193	1|1|8	1|1|0|3|1|2|0|0|0|3|0|11|8|0|13|3|2	3.33	1.18	0.22668	0.12	0.43	0.17334	FALSE
nsp2_nature	SFPQ	P23246	17|1|7	1|10|6|8|2|2|2|2|5|4|1|11|8|6|13|11|9	8.33	1.4	0.261738	0.09	0.46	0.175869	FALSE
nsp2_nature	PPIB	P23284	24|25|21	21|25|24|22|20|21|18|18|23|20|21|23|21|28|28|28|22	23.33	1.04	0.329211	0	0.71	0.164605	FALSE
nsp2_nature	RPS3	P23396	22|21|14	21|10|15|15|8|5|6|12|12|12|8|10|12|13|15|14|9	19	1.64	0.329567	0	0.67	0.164783	FALSE
nsp2_nature	CFL1	P23528	7|6|6	6|7|6|6|5|6|2|3|8|2|4|7|7|4|5|6|5	6.33	1.21	0.338091	0	0.66	0.169046	FALSE
nsp2_nature	EIF4B	P23588	0|0|2	0|0|0|1|0|0|0|0|0|0|0|5|2|0|3|0|0	0.67	1.03	0.0591193	0.16	0.4	0.10956	FALSE
nsp2_nature	RRM1	P23921	1|3|0	2|0|0|1|0|0|0|0|0|2|1|3|4|3|1|0|3	1.33	1.13	0.223582	0.1	0.45	0.161791	FALSE
nsp2_nature	ATP5PB	P24539	2|1|3	0|0|0|0|0|0|0|0|0|0|0|0|0|0|0|0|0	2	20	0.329944	0.65	0.06	0.489972	FALSE
nsp2_nature	CDK2	P24941	0|0|1	0|0|0|0|0|0|0|0|0|0|0|1|0|0|2|0|0	0.33	1.89	0.115496	0	0.71	0.0577479	FALSE
nsp2_nature	MCM3	P25205	4|5|4	6|4|4|3|4|0|0|2|3|2|7|9|8|3|10|5|6	4.33	0.97	0.334235	0	0.66	0.167117	FALSE
nsp2_nature	RPS12	P25398	5|7|8	8|7|7|7|5|3|4|4|9|2|3|11|11|7|5|5|6	6.67	1.09	0.323686	0	0.68	0.161843	FALSE
nsp2_nature	BRD2	P25440	1|0|0	0|0|0|1|0|0|0|0|0|0|0|0|0|0|0|0|0	0.33	3.33	0.0204674	0	0.71	0.0102337	FALSE
nsp2_nature	ATP5F1A	P25705	15|18|18	4|5|7|4|8|5|3|4|5|6|4|11|9|9|7|5|10	17	2.73	0.3418	0.6	0.11	0.4709	FALSE
nsp2_nature	PSMA1	P25786	1|0|0	0|0|1|0|0|0|0|0|0|0|0|2|1|0|2|1|1	0.33	0.71	0.0470669	0	0.71	0.0235334	FALSE
nsp2_nature	MSN	P26038	0|0|1	0|0|0|0|0|0|0|0|0|0|0|10|2|0|6|0|0	0.33	0.31	0.0103229	0	0.71	0.00516146	FALSE
nsp2_nature	DDX6	P26196	2|2|1	1|3|1|1|3|3|0|0|3|1|2|8|5|4|2|5|2	1.67	0.64	0.317956	0	0.71	0.158978	FALSE
nsp2_nature	U2AF2	P26368	16|13|16	15|16|16|24|18|16|11|13|16|10|11|21|23|17|28|26|23	15	0.84	0.328678	0	0.71	0.164339	FALSE
nsp2_nature	RPL13	P26373	6|5|6	3|4|6|4|1|3|3|3|5|4|3|3|4|0|10|1|1	5.67	1.66	0.336382	0.01	0.57	0.173191	FALSE
nsp2_nature	HMGB2	P26583	14|12|18	9|13|12|20|16|14|4|13|13|7|10|20|16|17|18|20|11	14.67	1.07	0.328037	0	0.7	0.164019	FALSE
nsp2_nature	PTBP1	P26599	8|5|2	7|7|6|6|3|3|2|3|8|5|4|8|5|5|10|2|3	5	0.98	0.299929	0	0.65	0.149965	FALSE
nsp2_nature	EEF1G	P26641	0|1|3	5|3|6|5|5|3|5|4|4|2|4|7|7|6|7|6|8	1.33	0.26	0.172033	0	0.71	0.0860167	FALSE
nsp2_nature	FKBP2	P26885	1|2|1	1|2|2|2|1|1|1|0|2|1|1|1|1|1|1|2|1	1.33	1.08	0.315792	0.03	0.53	0.172896	FALSE
nsp2_nature	RPL10	P27635	5|4|4	7|6|6|6|5|5|5|7|6|3|3|6|5|7|7|8|5	4.33	0.76	0.325574	0	0.71	0.162787	FALSE
nsp2_nature	RPA1	P27694	4|0|0	0|1|0|1|1|0|0|0|1|0|0|0|0|0|0|0|0	1.33	5.67	0.103651	0.33	0.21	0.216825	FALSE
nsp2_nature	APEX1	P27695	6|4|19	6|5|3|15|8|5|2|4|2|2|3|17|16|7|21|15|5	9.67	1.21	0.279278	0	0.61	0.139639	FALSE
nsp2_nature	MAP4	P27816	4|4|3	6|2|3|4|2|4|3|2|4|4|3|7|5|2|3|2|4	3.67	1.04	0.335117	0	0.64	0.167558	FALSE
nsp2_nature	CANX	P27824	3|5|6	0|0|0|0|0|0|0|0|0|0|0|0|0|0|0|0|0	4.67	46.67	0.324276	1	0	0.662138	FALSE
nsp2_nature	PSMB4	P28070	3|3|2	2|2|2|0|1|1|3|0|1|5|3|5|5|4|3|4|4	2.67	1.01	0.340137	0	0.62	0.170068	FALSE
nsp2_nature	GRN	P28799	2|2|2	0|0|2|2|3|0|0|3|1|0|0|1|0|0|2|2|2	2	1.89	0.390794	0.13	0.42	0.260397	FALSE
nsp2_nature	MPG	P29372	11|9|8	6|6|8|8|10|4|6|6|7|8|6|8|9|6|8|8|7	9.33	1.31	0.336298	0	0.67	0.168149	FALSE
nsp2_nature	EEF1D	P29692	2|1|0	2|1|4|1|4|3|3|3|6|2|3|7|6|4|7|7|7	1	0.24	0.195413	0	0.71	0.0977064	FALSE
nsp2_nature	ERP29	P30040	0|0|2	0|0|0|0|0|0|0|0|0|1|0|4|2|0|2|0|0	0.67	1.26	0.0876564	0.18	0.39	0.133828	FALSE
nsp2_nature	PRDX6	P30041	2|1|2	3|6|5|4|3|2|1|1|2|2|1|6|4|3|4|2|0	1.67	0.58	0.317605	0	0.71	0.158803	FALSE
nsp2_nature	PRDX3	P30048	2|3|2	3|1|4|2|2|0|0|1|2|2|3|1|3|2|2|2|1	2.33	1.28	0.32568	0.02	0.54	0.17284	FALSE
nsp2_nature	ATP5F1D	P30049	1|1|2	0|0|0|0|0|0|0|0|0|0|0|0|0|0|0|0|0	1.33	13.33	0.407213	0.32	0.22	0.363607	FALSE
nsp2_nature	RPL12	P30050	4|0|0	2|5|5|4|0|0|2|0|5|0|0|2|2|0|4|0|0	1.33	0.73	0.0128401	0.05	0.49	0.03142	FALSE
nsp2_nature	PDIA3	P30101	11|12|10	8|7|8|9|6|4|2|4|8|7|6|12|5|4|9|5|7	11	1.68	0.342558	0	0.64	0.171279	FALSE
nsp2_nature	PPIF	P30405	0|2|0	1|3|2|1|1|0|1|2|2|0|1|1|0|0|0|1|0	0.67	0.71	0.0351674	0.06	0.49	0.0475837	FALSE
nsp2_nature	NMT1	P30419	0|0|2	0|0|0|2|0|0|0|0|0|0|1|7|6|3|10|5|0	0.67	0.33	0.0200829	0	0.71	0.0100414	FALSE
nsp2_nature	LRPAP1	P30533	2|0|6	2|7|2|7|4|3|1|1|2|5|3|9|8|5|10|7|3	2.67	0.57	0.171778	0	0.66	0.0858891	FALSE
nsp2_nature	SDHA	P31040	2|4|1	2|0|2|1|0|0|0|0|1|0|0|2|2|0|0|0|3	2.33	3.05	0.285234	0.37	0.16	0.327617	FALSE
nsp2_nature	MAT2A	P31153	1|1|0	1|0|1|1|1|0|1|1|2|0|1|1|1|1|2|2|2	0.67	0.63	0.207361	0	0.71	0.103681	FALSE
nsp2_nature	DNAJA1	P31689	0|1|4	0|0|2|6|7|0|0|7|1|1|1|1|1|2|9|7|4	1.67	0.58	0.152083	0	0.61	0.0760415	FALSE
nsp2_nature	UQCRC1	P31930	3|2|4	0|0|0|0|0|0|0|0|0|0|0|0|0|0|0|1|1	3	25.5	0.515252	0.98	0	0.747626	FALSE
nsp2_nature	HNRNPH3	P31942	5|0|0	0|2|1|7|0|0|0|0|0|0|0|0|0|0|2|0|0	1.67	2.36	0.0900994	0.28	0.32	0.18505	FALSE
nsp2_nature	HNRNPH1	P31943	3|1|0	1|4|3|3|0|1|1|2|2|1|3|3|3|2|3|1|4	1.33	0.61	0.182499	0	0.6	0.0912497	FALSE
nsp2_nature	PRDX2	P32119	1|1|0	1|0|1|0|1|0|0|0|1|0|1|0|0|0|0|0|0	0.67	2.27	0.251256	0	0.71	0.125628	FALSE
nsp2_nature	ARRB2	P32121	15|18|12	14|12|17|10|9|8|10|8|15|5|8|20|21|17|16|15|13	15	1.17	0.335709	0	0.7	0.167855	FALSE
nsp2_nature	RPL9	P32969	8|8|10	6|8|10|12|8|6|6|7|5|4|8|9|7|4|13|6|6	8.67	1.18	0.327757	0	0.68	0.163878	FALSE
nsp2_nature	DUT	P33316	9|4|6	4|5|5|6|5|5|5|5|6|2|3|3|4|3|4|7|4	6.33	1.42	0.333425	0.01	0.59	0.171712	FALSE
nsp2_nature	MCM5	P33992	7|4|5	4|3|3|3|1|1|1|1|2|7|2|5|4|5|6|4|5	5.33	1.59	0.34158	0.02	0.54	0.18079	FALSE
nsp2_nature	HSPA4	P34932	0|0|1	0|0|0|0|0|0|0|0|0|0|0|0|0|0|1|2|6	0.33	0.63	0.00281144	0	0.71	0.00140572	FALSE
nsp2_nature	PRSS3	P35030	1|1|1	1|1|1|1|1|1|1|1|1|1|1|0|0|0|0|0|0	1	1.55	0.329322	0	0.71	0.164661	FALSE
nsp2_nature	PFN2	P35080	1|2|1	1|1|0|1|2|2|1|1|2|1|1|1|2|1|1|2|1	1.33	1.08	0.31365	0.03	0.53	0.171825	FALSE
nsp2_nature	PHB	P35232	2|2|0	4|4|10|3|6|3|8|4|6|7|6|9|9|9|7|9|6	1.33	0.21	0.198209	0	0.71	0.0991047	FALSE
nsp2_nature	RPL22	P35268	5|8|10	5|6|5|7|10|7|6|8|7|7|7|9|9|10|9|7|11	7.67	1	0.316804	0	0.69	0.158402	FALSE
nsp2_nature	GTF2F1	P35269	0|0|1	0|0|0|3|1|1|0|0|0|1|0|9|6|5|9|5|3	0.33	0.13	0.012084	0	0.71	0.00604198	FALSE
nsp2_nature	KRT9	P35527	0|0|1	0|0|0|0|1|0|0|0|0|0|0|0|1|1|1|1|1	0.33	0.94	0.0460133	0	0.71	0.0230067	FALSE
nsp2_nature	MYH9	P35579	0|0|1	0|0|0|0|0|0|0|0|0|0|0|0|0|0|2|0|0	0.33	2.83	0.0019993	0	0.71	0.000999649	FALSE
nsp2_nature	SOAT1	P35610	1|1|0	0|0|0|0|0|0|0|0|0|0|0|0|0|0|0|0|0	0.67	6.67	0.241249	0	0.71	0.120625	FALSE
nsp2_nature	BSG	P35613	2|4|2	0|0|0|0|0|0|0|0|0|0|0|0|0|0|0|0|0	2.67	26.67	0.343499	0.97	0	0.656749	FALSE
nsp2_nature	FUS	P35637	4|1|1	1|2|4|2|0|0|0|0|2|2|1|2|1|1|3|1|1	2	1.48	0.305599	0.15	0.41	0.227799	FALSE
nsp2_nature	DEK	P35659	12|8|12	9|11|12|16|13|6|7|10|12|8|8|14|12|11|16|12|15	10.67	0.94	0.328795	0	0.7	0.164398	FALSE
nsp2_nature	PSMC2	P35998	0|1|0	0|0|0|0|0|0|0|0|0|0|0|1|1|1|0|3|3	0.33	0.63	0.0239897	0	0.71	0.0119949	FALSE
nsp2_nature	ATP5F1C	P36542	3|4|3	0|0|0|2|0|0|0|0|0|2|0|0|2|1|3|3|1	3.33	4.05	0.334817	0.6	0.11	0.467409	FALSE
nsp2_nature	RPL4	P36578	12|1|0	0|5|8|8|0|0|0|0|6|0|0|0|0|0|4|0|1	4.33	2.3	0.110467	0.3	0.3	0.205233	FALSE
nsp2_nature	GPX4	P36969	4|3|3	2|3|3|4|3|0|0|2|3|0|0|3|3|4|3|2|3	3.33	1.49	0.336306	0.02	0.54	0.178153	FALSE
nsp2_nature	SRP14	P37108	2|2|3	2|3|3|3|5|2|1|3|3|2|3|6|5|2|2|2|2	2.33	0.81	0.320759	0	0.64	0.160379	FALSE
nsp2_nature	TAGLN2	P37802	2|1|1	2|1|1|1|0|0|0|0|3|0|1|2|2|1|1|1|1	1.33	1.33	0.326419	0.05	0.49	0.188209	FALSE
nsp2_nature	RBMX	P38159	4|0|0	0|2|2|1|0|0|0|0|1|0|0|0|0|0|0|0|0	1.33	3.78	0.0745435	0.32	0.22	0.197272	FALSE
nsp2_nature	HSPA9	P38646	40|37|37	17|12|18|17|18|15|12|9|13|14|15|22|16|17|24|22|25	38	2.26	0.33916	0.01	0.58	0.17458	FALSE
nsp2_nature	EIF4A3	P38919	6|0|0	1|2|2|1|0|0|1|0|1|0|0|1|1|0|1|0|1	2	2.83	0.0595418	0.33	0.21	0.194771	FALSE
nsp2_nature	RPS19	P39019	14|12|11	14|12|9|14|6|4|5|7|8|10|8|9|10|9|10|8|8	12.33	1.39	0.336751	0	0.68	0.168375	FALSE
nsp2_nature	RPL3	P39023	8|0|0	1|7|9|4|0|0|0|0|9|0|0|0|0|0|3|0|0	2.67	1.37	0.0176444	0.25	0.34	0.133822	FALSE
nsp2_nature	DDOST	P39656	0|2|4	0|0|0|0|0|0|0|0|0|0|0|0|0|0|0|0|0	2	20	0.222557	0.65	0.05	0.436279	FALSE
nsp2_nature	FEN1	P39748	3|0|11	11|9|3|14|9|4|2|1|1|5|10|15|13|8|19|15|9	4.67	0.54	0.155314	0	0.69	0.0776568	FALSE
nsp2_nature	CCT6A	P40227	3|2|6	0|0|0|1|0|0|0|0|1|0|0|4|6|5|6|9|10	3.67	1.48	0.323707	0.08	0.47	0.201853	FALSE
nsp2_nature	RPL13A	P40429	1|0|0	0|2|1|1|0|0|0|0|2|0|0|0|0|0|1|0|0	0.33	0.81	0.013451	0	0.71	0.00672552	FALSE
nsp2_nature	MDH2	P40926	2|2|1	3|1|1|1|1|1|0|0|4|1|2|2|4|0|1|0|0	1.67	1.29	0.331521	0.04	0.51	0.185761	FALSE
nsp2_nature	RFC3	P40938	1|0|0	0|0|0|0|0|0|0|0|0|0|0|1|0|0|0|0|0	0.33	3.33	0.0190321	0	0.71	0.00951604	FALSE
nsp2_nature	HADHA	P40939	3|1|0	0|0|1|3|0|0|0|0|0|0|0|0|0|0|0|0|0	1.33	5.67	0.184562	0.3	0.3	0.242281	FALSE
nsp2_nature	EIF2S3	P41091	0|0|1	0|0|0|1|0|0|0|0|0|0|0|1|1|1|3|2|0	0.33	0.63	0.0621037	0	0.71	0.0310518	FALSE
nsp2_nature	EIF2D	P41214	0|0|1	0|0|0|2|0|0|0|0|0|0|0|2|2|0|1|0|0	0.33	0.81	0.0589076	0	0.71	0.0294538	FALSE
nsp2_nature	BUD31	P41223	2|5|3	3|3|3|4|4|1|2|3|3|3|2|7|7|4|7|4|5	3.33	0.87	0.308185	0	0.65	0.154092	FALSE
nsp2_nature	NAA10	P41227	1|1|0	0|0|0|0|0|0|0|0|0|0|0|1|1|0|1|1|0	0.67	2.83	0.359021	0	0.71	0.17951	FALSE
nsp2_nature	CSK	P41240	1|0|1	0|0|0|0|0|0|0|0|1|0|0|1|1|0|0|0|0	0.67	3.78	0.304522	0	0.71	0.152261	FALSE
nsp2_nature	EIF1	P41567	0|0|3	0|0|0|2|1|0|0|0|0|0|0|3|1|0|4|2|1	1	1.21	0.0388461	0.18	0.39	0.109423	FALSE
nsp2_nature	TMPO	P42166	5|0|0	0|0|0|4|0|0|0|0|0|0|0|1|0|0|0|0|0	1.67	5.67	0.274329	0.32	0.22	0.297165	FALSE
nsp2_nature	TMPO	P42167	2|2|2	0|0|0|0|0|0|0|0|0|0|0|0|0|0|1|0|0	2	20	0.380296	0.95	0.01	0.665148	FALSE
nsp2_nature	CASP2	P42575	2|2|2	2|1|1|0|0|0|0|0|1|1|1|3|1|2|0|0|0	2	2.62	0.397413	0.28	0.32	0.338706	FALSE
nsp2_nature	RPS27	P42677	2|3|5	4|5|3|5|2|2|4|4|4|2|2|4|3|5|4|4|4	3.33	0.93	0.304772	0	0.64	0.152386	FALSE
nsp2_nature	RPL35	P42766	3|3|4	5|2|2|3|3|3|3|3|4|2|4|2|3|4|2|2|3	3.33	1.13	0.328616	0	0.62	0.164308	FALSE
nsp2_nature	MATR3	P43243	17|0|0	0|14|10|5|0|0|0|0|4|0|0|0|0|0|5|0|0	5.67	2.54	0.040821	0.31	0.3	0.17541	FALSE
nsp2_nature	RANBP1	P43487	0|0|1	1|0|0|0|0|0|0|0|0|0|1|1|0|0|0|0|0	0.33	1.89	0.0137035	0	0.71	0.00685174	FALSE
nsp2_nature	VDAC2	P45880	7|11|7	0|0|0|0|0|0|0|0|0|0|0|1|0|0|0|0|0	8.33	83.33	0.333722	1	0	0.666861	FALSE
nsp2_nature	CBX5	P45973	2|0|1	0|1|1|1|1|0|0|0|0|0|1|1|0|1|4|0|0	1	1.55	0.246367	0.13	0.42	0.188184	FALSE
nsp2_nature	MKI67	P46013	3|0|0	0|0|0|0|0|0|0|0|0|0|0|0|0|0|0|0|0	1	10	0.0538196	0.33	0.19	0.19191	FALSE
nsp2_nature	RECQL	P46063	0|0|1	0|0|1|0|1|0|0|0|0|0|0|0|0|0|0|0|0	0.33	2.83	0.0348593	0	0.71	0.0174296	FALSE
nsp2_nature	NOP2	P46087	1|0|0	0|1|1|0|0|0|0|0|0|0|0|0|0|0|0|0|0	0.33	2.83	0.00615106	0	0.71	0.00307553	FALSE
nsp2_nature	CRKL	P46109	19|17|21	18|15|15|18|16|12|15|12|18|14|14|12|12|16|16|19|19	19	1.24	0.335997	0	0.71	0.167998	FALSE
nsp2_nature	RPL27A	P46776	3|3|1	0|3|3|2|2|2|2|1|2|1|1|2|1|0|3|1|0	2.33	1.53	0.303659	0.07	0.48	0.186829	FALSE
nsp2_nature	RPL5	P46777	2|0|0	0|2|1|10|0|0|0|0|1|0|0|11|7|3|11|2|0	0.67	0.24	0.00853118	0	0.71	0.00426559	FALSE
nsp2_nature	RPL21	P46778	3|0|2	4|4|3|4|4|3|1|1|2|3|1|5|5|7|5|4|4	1.67	0.47	0.201715	0	0.71	0.100858	FALSE
nsp2_nature	RPL28	P46779	3|1|2	1|2|2|2|2|2|1|2|3|1|2|1|2|1|3|2|1	2	1.13	0.312696	0.02	0.54	0.166348	FALSE
nsp2_nature	RPS9	P46781	5|3|7	1|4|4|4|3|6|2|2|6|6|5|6|5|3|4|2|3	5	1.29	0.32008	0	0.61	0.16004	FALSE
nsp2_nature	RPS5	P46782	7|7|7	6|7|2|10|4|3|3|2|3|4|2|6|7|4|6|4|4	7	1.55	0.330281	0	0.63	0.16514	FALSE
nsp2_nature	RPS10	P46783	3|5|4	5|4|2|7|3|1|1|4|2|3|4|6|3|2|8|5|5	4	1.05	0.319289	0	0.65	0.159644	FALSE
nsp2_nature	CAPZA2	P47755	0|1|0	1|0|0|0|0|0|0|0|0|0|0|0|0|0|0|0|0	0.33	3.33	0.111594	0	0.71	0.0557972	FALSE
nsp2_nature	CAPZB	P47756	4|3|4	2|1|3|4|2|1|0|3|3|0|1|3|3|3|3|3|2	3.67	1.68	0.361644	0.04	0.52	0.200822	FALSE
nsp2_nature	EIF1AX	P47813	1|1|2	1|2|2|1|2|1|2|1|1|0|0|2|2|2|2|3|3	1.33	0.84	0.315682	0.01	0.58	0.162841	FALSE
nsp2_nature	RPL29	P47914	1|1|1	1|1|1|1|1|0|0|1|1|0|1|1|1|0|1|0|0	1	1.55	0.33297	0	0.71	0.166485	FALSE
nsp2_nature	ATP5PO	P48047	5|4|5	1|0|1|1|1|0|0|0|1|1|1|1|1|1|1|1|1	4.67	6.1	0.370257	0.91	0.01	0.640128	FALSE
nsp2_nature	ARCN1	P48444	0|0|1	0|0|0|0|0|0|0|0|0|0|0|1|0|0|4|0|0	0.33	1.13	0.00598019	0	0.71	0.0029901	FALSE
nsp2_nature	GCLM	P48507	1|2|0	2|1|1|1|1|1|1|1|4|2|2|2|3|2|4|2|1	1	0.55	0.188556	0	0.6	0.0942778	FALSE
nsp2_nature	CCT5	P48643	5|3|2	0|1|0|0|1|0|0|1|0|0|0|5|3|4|7|8|7	3.33	1.53	0.32898	0.07	0.48	0.19949	FALSE
nsp2_nature	CSNK1A1	P48729	1|0|1	1|0|1|1|0|0|1|2|0|0|1|0|1|0|0|0|0	0.67	1.42	0.226873	0	0.71	0.113436	FALSE
nsp2_nature	CSNK1D	P48730	2|2|2	2|3|3|2|1|0|0|1|0|1|2|1|1|1|1|0|0	2	1.79	0.341454	0.11	0.44	0.225727	FALSE
nsp2_nature	RPL34	P49207	2|0|1	0|2|0|0|0|0|0|0|0|0|1|0|1|0|2|1|0	1	2.43	0.208669	0.19	0.38	0.199334	FALSE
nsp2_nature	LMAN1	P49257	0|0|1	0|0|0|0|0|0|0|0|0|0|0|0|0|0|0|0|0	0.33	3.33	0.0326908	0	0.71	0.0163454	FALSE
nsp2_nature	FASN	P49327	0|1|0	0|0|0|1|0|0|0|0|0|0|0|2|4|2|1|4|4	0.33	0.31	0.0136037	0	0.71	0.00680186	FALSE
nsp2_nature	CCT3	P49368	2|4|5	0|0|1|0|2|0|0|0|1|0|0|7|5|3|10|14|11	3.67	1.15	0.314633	0.01	0.59	0.162317	FALSE
nsp2_nature	TUFM	P49411	3|3|1	3|0|0|0|0|0|0|0|2|4|1|1|4|4|0|0|2	2.33	1.89	0.293494	0.18	0.38	0.236747	FALSE
nsp2_nature	SRP9	P49458	5|5|4	1|2|4|5|4|2|3|3|4|1|1|5|3|2|4|4|4	4.67	1.53	0.335012	0.01	0.58	0.172506	FALSE
nsp2_nature	CSNK1E	P49674	1|3|1	1|3|0|3|1|2|1|1|2|2|1|1|1|0|1|1|1	1.67	1.29	0.275628	0.07	0.48	0.172814	FALSE
nsp2_nature	RBM25	P49756	4|2|2	6|4|4|5|3|3|3|1|4|2|2|14|11|9|6|11|5	2.67	0.49	0.315559	0	0.71	0.15778	FALSE
nsp2_nature	NUP153	P49790	1|0|0	0|0|0|0|1|1|1|0|0|0|0|0|0|0|0|0|0	0.33	1.89	0.0215973	0	0.71	0.0107987	FALSE
nsp2_nature	GMPS	P49915	1|2|5	0|3|1|2|1|2|2|2|1|1|3|2|2|3|0|1|0	2.67	1.74	0.300084	0.21	0.36	0.255042	FALSE
nsp2_nature	EMD	P50402	5|1|0	1|0|2|2|0|0|0|0|1|0|0|0|0|0|1|1|2	2	3.4	0.154689	0.33	0.21	0.242344	FALSE
nsp2_nature	SERPINH1	P50454	1|3|4	1|0|3|2|0|0|0|1|1|2|2|3|1|1|3|1|1	2.67	2.06	0.285943	0.23	0.35	0.257971	FALSE
nsp2_nature	METAP2	P50579	0|0|1	0|0|0|1|0|0|0|0|0|0|0|4|3|0|4|1|0	0.33	0.44	0.0234123	0	0.71	0.0117062	FALSE
nsp2_nature	CDK9	P50750	1|0|0	0|0|0|1|1|0|0|0|0|0|0|1|2|0|2|0|1	0.33	0.71	0.016373	0	0.71	0.0081865	FALSE
nsp2_nature	RPL14	P50914	4|1|1	3|5|4|1|0|0|1|0|3|0|1|0|0|0|0|0|1	2	1.79	0.281968	0.19	0.37	0.235984	FALSE
nsp2_nature	CCT8	P50990	4|3|5	1|0|0|0|0|1|0|0|0|0|1|8|9|5|12|13|14	4	1.06	0.331907	0	0.63	0.165954	FALSE
nsp2_nature	CCT4	P50991	2|5|6	0|0|1|2|5|0|1|2|0|1|1|6|4|3|11|6|6	4.33	1.5	0.307514	0.03	0.52	0.168757	FALSE
nsp2_nature	DAP	P51397	1|0|0	0|1|1|0|1|0|1|1|1|1|0|2|1|2|0|2|1	0.33	0.38	0.0150529	0	0.71	0.00752646	FALSE
nsp2_nature	BCAP31	P51572	1|0|0	0|0|0|0|0|0|0|0|0|0|0|0|2|1|0|1|1	0.33	1.13	0.0243175	0	0.71	0.0121587	FALSE
nsp2_nature	HCFC1	P51610	3|3|1	1|2|1|1|2|1|0|2|2|1|0|1|2|2|0|1|1	2.33	1.98	0.330757	0.19	0.38	0.260379	FALSE
nsp2_nature	HDGF	P51858	1|0|2	0|2|2|3|0|1|0|1|1|0|1|4|3|2|2|2|2	1	0.65	0.207058	0.01	0.57	0.108529	FALSE
nsp2_nature	NDUFA8	P51970	1|1|2	1|3|2|2|1|0|0|0|1|1|0|1|1|4|5|2|2	1.33	0.87	0.307802	0.01	0.57	0.158901	FALSE
nsp2_nature	HNRNPA3	P51991	11|0|0	1|9|10|6|0|0|0|0|4|1|0|0|0|1|7|1|1	3.67	1.52	0.0447019	0.27	0.32	0.157351	FALSE
nsp2_nature	HNRNPM	P52272	22|4|2	7|16|12|8|2|1|3|2|12|4|3|5|5|1|7|2|3	9.33	1.71	0.221975	0.3	0.3	0.260987	FALSE
nsp2_nature	KPNA2	P52292	1|0|0	0|0|0|1|0|0|0|0|0|0|0|1|0|0|1|0|0	0.33	1.89	0.00732503	0	0.71	0.00366251	FALSE
nsp2_nature	RAP1GDS1	P52306	11|12|13	0|0|0|0|0|0|0|0|0|0|0|0|0|0|0|0|0	12	120	0.991627	1	0	0.995814	TRUE
nsp2_nature	HNRNPF	P52597	5|3|3	4|6|3|12|2|1|0|1|5|1|4|5|5|5|5|5|7	3.67	0.88	0.320326	0	0.66	0.160163	FALSE
nsp2_nature	CAPZA1	P52907	3|3|4	1|0|0|1|0|1|0|1|3|1|1|5|3|4|3|4|5	3.33	1.72	0.370791	0.06	0.49	0.215396	FALSE
nsp2_nature	HMGA2	P52926	1|1|0	0|0|0|1|1|1|1|1|2|0|0|2|1|0|2|0|2	0.67	0.81	0.218468	0	0.71	0.109234	FALSE
nsp2_nature	PLK1	P53350	4|6|6	6|8|6|2|2|1|0|3|5|1|3|0|1|2|0|0|0	5.33	2.27	0.350741	0.17	0.39	0.26037	FALSE
nsp2_nature	NUBP1	P53384	3|1|2	1|1|3|2|1|0|1|0|1|0|0|3|4|2|3|1|3	2	1.31	0.35637	0.04	0.51	0.198185	FALSE
nsp2_nature	METAP1	P53582	0|0|2	0|0|0|2|0|0|0|0|0|0|0|1|1|0|3|0|0	0.67	1.62	0.090435	0.19	0.37	0.140218	FALSE
nsp2_nature	SUB1	P53999	13|14|16	12|13|15|15|13|11|12|10|13|11|11|18|17|14|21|13|18	14.33	1.03	0.328686	0	0.71	0.164343	FALSE
nsp2_nature	YARS1	P54577	0|0|3	0|0|0|4|0|0|0|0|0|0|0|21|7|0|26|3|0	1	0.28	0.0186539	0	0.71	0.00932694	FALSE
nsp2_nature	AK2	P54819	1|0|0	1|0|3|1|0|0|0|0|0|0|0|2|1|1|0|1|2	0.33	0.47	0.0219953	0	0.71	0.0109976	FALSE
nsp2_nature	ALDH18A1	P54886	4|6|2	6|1|5|3|0|1|2|3|5|5|5|3|4|1|3|5|6	4	1.17	0.315019	0	0.6	0.157509	FALSE
nsp2_nature	EIF5	P55010	0|0|4	0|0|0|5|0|0|0|0|0|1|0|9|6|3|8|2|0	1.33	0.67	0.0379589	0.05	0.5	0.0439794	FALSE
nsp2_nature	CSE1L	P55060	1|1|2	0|0|0|0|0|0|0|0|0|0|0|0|0|0|0|0|0	1.33	13.33	0.317779	0.32	0.22	0.31889	FALSE
nsp2_nature	MFAP1	P55081	6|2|5	4|4|3|3|4|4|4|3|5|1|2|6|4|3|7|6|6	4.33	1.07	0.332391	0	0.64	0.166196	FALSE
nsp2_nature	HADHB	P55084	1|0|0	0|0|0|0|0|0|0|0|0|0|0|0|0|0|0|0|0	0.33	3.33	0.035233	0	0.71	0.0176165	FALSE
nsp2_nature	MANF	P55145	4|3|7	2|5|2|10|5|5|1|1|3|2|3|6|5|5|7|5|2	4.67	1.15	0.317805	0	0.62	0.158903	FALSE
nsp2_nature	NAP1L1	P55209	1|0|0	0|0|0|3|0|0|0|0|0|0|0|0|0|0|1|1|0	0.33	1.13	0.0163181	0	0.71	0.00815903	FALSE
nsp2_nature	ADAR	P55265	2|0|0	0|1|0|0|0|0|0|0|0|0|0|0|0|0|1|0|0	0.67	5.67	0.0874125	0.31	0.29	0.198706	FALSE
nsp2_nature	SNU13	P55769	2|2|3	3|2|2|2|2|2|1|2|4|2|1|4|2|3|2|2|2	2.33	1.04	0.32749	0	0.61	0.163745	FALSE
nsp2_nature	HNRNPH2	P55795	1|0|0	0|0|1|0|0|0|0|0|0|0|0|0|0|0|0|0|0	0.33	3.33	0.0368069	0	0.71	0.0184035	FALSE
nsp2_nature	EIF3B	P55884	0|1|0	0|0|0|0|2|0|0|0|0|0|0|1|2|3|2|2|3	0.33	0.38	0.0262141	0	0.71	0.0131071	FALSE
nsp2_nature	ATP5MF	P56134	1|1|1	0|0|0|0|0|0|0|0|0|0|0|0|0|0|0|0|0	1	10	0.352851	0	0.71	0.176425	FALSE
nsp2_nature	RRP1	P56182	1|0|2	0|1|0|1|0|0|0|0|0|0|0|1|1|0|1|0|0	1	3.4	0.254939	0.24	0.34	0.24747	FALSE
nsp2_nature	MAZ	P56270	8|7|9	8|5|8|6|7|4|2|5|10|1|3|6|3|4|7|9|6	8	1.45	0.335774	0	0.65	0.167887	FALSE
nsp2_nature	EIF6	P56537	1|0|0	0|1|0|0|0|0|0|0|0|0|0|0|0|0|0|0|0	0.33	3.33	0.0525348	0	0.71	0.0262674	FALSE
nsp2_nature	RWDD2B	P57060	2|0|0	2|3|1|3|3|1|2|0|3|2|2|0|0|1|1|2|1	0.67	0.42	0.0114858	0.01	0.58	0.0107429	FALSE
nsp2_nature	TMEM33	P57088	1|0|1	0|0|0|0|0|0|0|0|0|0|0|0|0|0|0|0|1	0.67	6.67	0.204569	0	0.71	0.102285	FALSE
nsp2_nature	MTPN	P58546	2|4|1	3|1|3|2|1|0|1|0|1|1|2|1|2|3|5|3|4	2.33	1.2	0.302232	0.04	0.52	0.171116	FALSE
nsp2_nature	ELOF1	P60002	2|2|1	0|0|1|1|0|0|0|0|1|0|0|1|1|1|1|1|1	1.67	3.15	0.358918	0.31	0.29	0.334459	FALSE
nsp2_nature	SEC61B	P60468	0|1|2	1|1|2|1|0|0|0|0|0|0|1|0|0|0|1|1|1	1	1.89	0.203951	0.16	0.4	0.181976	FALSE
nsp2_nature	ERVFC1	P60507	0|0|1	0|0|0|0|0|1|0|0|1|1|0|0|0|1|1|0|1	0.33	0.94	0.0290841	0	0.71	0.014542	FALSE
nsp2_nature	MYL6	P60660	0|0|1	0|0|0|0|0|0|0|0|0|0|0|0|0|0|0|0|1	0.33	3.33	0.0268618	0	0.71	0.0134309	FALSE
nsp2_nature	ACTB	P60709	1|1|1	1|1|1|1|1|1|0|1|2|0|0|1|1|1|1|1|1	1	1.13	0.339803	0	0.71	0.169902	FALSE
nsp2_nature	EIF4A1	P60842	1|1|0	0|0|1|1|0|0|0|0|0|0|0|0|1|2|0|0|0	0.67	2.27	0.234608	0	0.71	0.117304	FALSE
nsp2_nature	RPS20	P60866	8|8|8	7|6|8|9|6|5|4|6|6|6|7|4|5|6|8|5|7	8	1.3	0.330745	0	0.67	0.165372	FALSE
nsp2_nature	PRPS1	P60891	1|0|0	0|0|0|0|0|0|0|0|0|0|0|1|0|0|0|0|0	0.33	3.33	0.016832	0	0.71	0.00841601	FALSE
nsp2_nature	DSTN	P60981	2|2|1	1|1|2|2|2|2|0|1|1|0|0|2|1|1|2|2|3	1.67	1.23	0.329124	0.03	0.52	0.179562	FALSE
nsp2_nature	CKS1B	P61024	0|0|1	0|0|0|0|0|0|0|0|0|0|0|0|0|0|0|0|0	0.33	3.33	0.172423	0	0.71	0.0862116	FALSE
nsp2_nature	ABCE1	P61221	0|0|1	1|0|0|0|0|1|1|0|0|0|1|0|0|0|1|0|0	0.33	1.13	0.033686	0	0.71	0.016843	FALSE
nsp2_nature	RPS3A	P61247	12|7|11	9|15|15|16|15|10|6|8|12|7|7|14|11|10|13|9|8	10	0.92	0.32716	0	0.7	0.16358	FALSE
nsp2_nature	RPL15	P61313	4|0|0	0|4|2|3|0|0|0|0|2|0|0|0|0|0|3|0|0	1.33	1.62	0.0205154	0.23	0.35	0.125258	FALSE
nsp2_nature	RPL27	P61353	4|1|0	0|3|0|1|0|0|1|0|1|0|1|0|1|1|2|0|0	1.67	2.58	0.17807	0.3	0.3	0.239035	FALSE
nsp2_nature	RPL37A	P61513	5|6|3	3|5|4|3|5|2|3|3|3|2|2|3|4|5|6|5|4	4.67	1.28	0.317539	0	0.61	0.15877	FALSE
nsp2_nature	HSPE1	P61604	0|1|0	0|0|1|1|1|0|0|0|1|0|1|1|0|0|0|0|0	0.33	0.94	0.0304999	0	0.71	0.0152499	FALSE
nsp2_nature	VBP1	P61758	1|0|0	0|0|0|0|0|0|0|1|0|0|0|0|0|0|0|0|0	0.33	3.33	0.0632763	0	0.71	0.0316382	FALSE
nsp2_nature	RPL37	P61927	1|1|1	0|0|1|2|1|1|1|1|1|0|0|1|1|0|1|0|0	1	1.55	0.338328	0	0.71	0.169164	FALSE
nsp2_nature	SUMO2	P61956	1|0|1	0|0|0|0|1|0|0|1|0|0|0|0|0|0|0|1|0	0.67	3.78	0.331576	0	0.71	0.165788	FALSE
nsp2_nature	HNRNPK	P61978	13|8|11	13|14|12|15|11|5|7|6|11|4|4|12|9|6|9|9|7	10.67	1.18	0.335322	0	0.69	0.167661	FALSE
nsp2_nature	RPS7	P62081	14|12|17	11|19|12|15|19|11|9|14|12|12|11|24|14|13|18|12|12	14.33	1.02	0.327203	0	0.71	0.163601	FALSE
nsp2_nature	PSMC1	P62191	0|0|1	0|0|0|0|0|0|0|0|0|0|0|0|0|0|1|1|1	0.33	1.89	0.0412201	0	0.71	0.0206101	FALSE
nsp2_nature	PSMC5	P62195	2|0|0	0|0|0|1|0|0|0|0|0|0|0|0|1|0|2|1|2	0.67	1.62	0.0335055	0.19	0.38	0.111753	FALSE
nsp2_nature	RPS8	P62241	10|2|3	2|5|4|6|3|2|1|0|6|1|3|6|5|5|6|0|2	5	1.49	0.283766	0.21	0.37	0.246883	FALSE
nsp2_nature	RPS15A	P62244	3|2|5	2|2|4|4|3|3|1|1|3|1|3|3|3|3|5|4|3	3.33	1.18	0.313188	0.01	0.58	0.161594	FALSE
nsp2_nature	RPS16	P62249	11|12|12	12|8|10|11|7|6|4|6|10|8|6|7|9|10|7|5|5	11.67	1.51	0.330026	0	0.67	0.165013	FALSE
nsp2_nature	YWHAE	P62258	1|1|2	0|1|1|1|0|0|0|0|2|0|0|2|1|1|2|2|0	1.33	1.74	0.317551	0.1	0.45	0.208775	FALSE
nsp2_nature	RPS14	P62263	7|7|7	4|7|6|9|7|3|3|5|7|6|6|6|5|5|6|5|4	7	1.27	0.334406	0	0.66	0.167203	FALSE
nsp2_nature	RPS23	P62266	4|8|7	9|7|7|8|5|7|6|8|9|6|7|9|9|7|7|5|6	6.33	0.88	0.308781	0	0.69	0.15439	FALSE
nsp2_nature	RPS18	P62269	7|6|7	8|6|8|6|4|8|4|6|9|7|8|10|10|7|7|7|8	6.67	0.92	0.326981	0	0.71	0.163491	FALSE
nsp2_nature	RPS29	P62273	4|3|2	5|3|5|4|2|1|1|5|4|1|1|1|1|3|4|2|3	3	1.11	0.319716	0	0.61	0.159858	FALSE
nsp2_nature	RPS13	P62277	8|6|5	5|5|5|7|5|5|4|6|7|2|5|5|4|4|4|4|3	6.33	1.35	0.329054	0	0.63	0.164527	FALSE
nsp2_nature	RPS11	P62280	10|9|7	8|11|10|9|8|9|6|9|8|2|4|9|9|9|12|12|8	8.67	1.03	0.326777	0	0.69	0.163389	FALSE
nsp2_nature	SNRPE	P62304	1|0|1	0|1|1|2|0|0|0|0|0|0|0|2|1|1|1|1|1	0.67	1.03	0.221392	0	0.71	0.110696	FALSE
nsp2_nature	SNRPF	P62306	2|0|1	1|1|1|2|0|0|0|1|1|1|0|1|1|0|2|1|1	1	1.21	0.20408	0.08	0.46	0.14204	FALSE
nsp2_nature	SNRPD1	P62314	0|0|1	0|0|1|2|0|0|0|0|0|0|0|2|2|1|1|0|0	0.33	0.63	0.0355515	0	0.71	0.0177758	FALSE
nsp2_nature	SNRPD2	P62316	2|0|0	1|2|3|2|1|0|0|0|0|0|1|3|4|3|2|3|1	0.67	0.44	0.0213128	0.01	0.57	0.0156564	FALSE
nsp2_nature	SNRPD3	P62318	0|0|1	1|1|1|2|1|1|1|1|1|1|1|1|1|1|2|1|1	0.33	0.3	0.0115075	0	0.71	0.00575375	FALSE
nsp2_nature	RPL7A	P62424	9|0|0	0|7|4|5|0|0|0|0|4|0|0|0|0|0|4|0|0	3	2.12	0.0226667	0.29	0.31	0.156333	FALSE
nsp2_nature	CNBP	P62633	16|13|11	12|7|15|12|8|7|6|8|10|0|0|12|16|8|9|10|11	13.33	1.5	0.335057	0	0.67	0.167528	FALSE
nsp2_nature	RPS4X	P62701	10|15|11	9|11|11|11|14|7|10|13|12|5|7|11|10|8|10|10|7	12	1.23	0.323529	0	0.69	0.161765	FALSE
nsp2_nature	RPL23A	P62750	8|10|7	9|7|11|12|13|6|5|10|14|7|6|8|11|10|11|10|8	8.33	0.9	0.3222	0	0.7	0.1611	FALSE
nsp2_nature	RPS6	P62753	5|1|2	4|5|4|6|4|2|3|1|3|2|2|5|2|3|4|2|3	2.67	0.82	0.282058	0	0.62	0.141029	FALSE
nsp2_nature	H4C9	P62805	22|4|6	7|16|17|11|1|3|6|0|12|1|2|2|4|2|15|4|2	10.67	1.73	0.283689	0.22	0.36	0.251845	FALSE
nsp2_nature	RAN	P62826	5|3|3	1|5|4|5|2|1|1|1|4|3|3|6|4|3|6|3|4	3.67	1.11	0.332772	0	0.62	0.166386	FALSE
nsp2_nature	RPL23	P62829	9|12|10	8|10|10|6|11|5|6|11|10|6|6|10|10|8|9|7|7	10.33	1.25	0.325606	0	0.68	0.162803	FALSE
nsp2_nature	RPS15	P62841	3|5|4	4|3|4|2|4|2|1|2|2|1|4|3|3|3|3|1|0	4	1.62	0.324042	0.03	0.53	0.177021	FALSE
nsp2_nature	RPS24	P62847	6|8|8	7|8|8|10|8|6|7|6|7|6|7|6|6|6|6|8|4	7.33	1.07	0.324798	0	0.68	0.162399	FALSE
nsp2_nature	RPS25	P62851	7|11|7	9|2|8|8|5|6|2|5|6|7|5|6|6|6|8|6|6	8.33	1.4	0.319959	0	0.63	0.15998	FALSE
nsp2_nature	RPS26	P62854	2|2|2	1|2|1|2|2|0|0|2|1|1|3|1|2|1|1|0|0	2	1.7	0.337184	0.09	0.46	0.213592	FALSE
nsp2_nature	RPS28	P62857	3|6|4	5|2|3|3|3|3|1|3|5|5|3|5|5|4|5|3|5	4.33	1.17	0.318063	0	0.62	0.159032	FALSE
nsp2_nature	FAU	P62861	5|4|5	4|5|4|4|4|3|4|1|3|5|5|5|4|5|4|4|5	4.67	1.15	0.331225	0	0.65	0.165613	FALSE
nsp2_nature	RPL30	P62888	13|10|9	10|10|9|9|6|8|7|7|9|4|4|9|10|8|9|8|7	10.67	1.35	0.332294	0	0.67	0.166147	FALSE
nsp2_nature	RPL31	P62899	5|5|5	7|5|7|5|7|6|6|5|6|3|5|4|7|5|5|6|4	5	0.91	0.325747	0	0.71	0.162874	FALSE
nsp2_nature	RPL10A	P62906	5|0|0	0|2|3|0|0|0|1|0|2|0|0|1|0|0|0|0|0	1.67	3.15	0.0199409	0.32	0.29	0.16997	FALSE
nsp2_nature	RPL32	P62910	5|4|4	0|4|4|5|1|2|1|1|2|1|1|2|1|4|2|2|2	4.33	2.1	0.345628	0.12	0.43	0.232814	FALSE
nsp2_nature	RPL11	P62913	11|8|9	10|11|12|10|8|4|6|9|9|4|6|8|10|6|8|8|6	9.33	1.18	0.331292	0	0.68	0.165646	FALSE
nsp2_nature	RPL8	P62917	6|0|0	0|1|1|2|0|0|0|0|1|0|0|0|0|0|2|0|0	2	4.86	0.0232555	0.33	0.18	0.176628	FALSE
nsp2_nature	PPIA	P62937	12|12|10	9|11|10|9|10|6|7|9|10|7|8|10|12|11|12|12|12	11.33	1.17	0.333559	0	0.7	0.16678	FALSE
nsp2_nature	FKBP1A	P62942	5|6|7	4|6|7|6|5|3|1|3|6|3|3|2|0|2|2|2|2	6	1.79	0.343124	0.02	0.54	0.181562	FALSE
nsp2_nature	RPS27A	P62979	4|5|4	6|3|4|4|3|3|2|3|5|0|1|4|3|3|4|3|3	4.33	1.36	0.329641	0	0.61	0.164821	FALSE
nsp2_nature	UBA52	P62987	4|3|4	4|3|3|4|4|3|4|4|4|0|0|2|2|2|2|2|2	3.67	1.39	0.326746	0.01	0.58	0.168373	FALSE
nsp2_nature	GRB2	P62993	1|1|1	0|0|1|1|0|0|0|0|0|1|0|2|1|1|0|1|1	1	1.89	0.380796	0	0.71	0.190398	FALSE
nsp2_nature	TRA2B	P62995	1|0|0	0|1|1|2|0|0|0|0|1|0|0|0|0|0|0|0|0	0.33	1.13	0.0306886	0	0.71	0.0153443	FALSE
nsp2_nature	PPP3R1	P63098	1|0|0	0|1|0|0|1|0|0|0|0|0|0|1|0|1|1|2|0	0.33	0.81	0.0254091	0	0.71	0.0127045	FALSE
nsp2_nature	YWHAZ	P63104	1|1|1	0|0|1|1|0|0|0|0|1|0|0|2|1|0|1|1|1	1	1.89	0.346888	0	0.71	0.173444	FALSE
nsp2_nature	DYNLL1	P63167	1|2|0	1|1|1|1|1|2|1|0|1|0|0|1|1|2|1|1|3	1	0.94	0.191993	0.04	0.5	0.115997	FALSE
nsp2_nature	RPL38	P63173	16|16|15	19|15|18|19|18|15|12|13|16|16|12|19|19|17|18|19|18	15.67	0.94	0.328683	0	0.71	0.164341	FALSE
nsp2_nature	SKP1	P63208	0|0|1	2|1|1|1|1|0|0|1|0|0|2|2|3|2|2|1|0	0.33	0.3	0.00884072	0	0.71	0.00442036	FALSE
nsp2_nature	RPS21	P63220	2|2|0	2|1|1|3|2|1|0|1|1|2|1|4|3|3|5|2|3	1.33	0.65	0.207042	0	0.71	0.103521	FALSE
nsp2_nature	EIF5A	P63241	0|0|1	0|1|0|0|0|0|1|0|0|0|1|3|0|1|2|1|0	0.33	0.57	0.014441	0	0.71	0.0072205	FALSE
nsp2_nature	RACK1	P63244	2|3|2	6|2|5|7|0|0|0|0|1|4|2|8|7|2|7|4|4	2.33	0.67	0.316766	0	0.71	0.158383	FALSE
nsp2_nature	ACTG1	P63261	1|1|1	1|1|0|0|1|0|0|0|1|0|0|1|1|1|0|0|0	1	2.43	0.351635	0	0.71	0.175817	FALSE
nsp2_nature	YBX1	P67809	6|0|0	0|2|5|1|1|0|1|0|1|0|0|3|1|1|4|2|2	2	1.42	0.0233806	0.27	0.32	0.14669	FALSE
nsp2_nature	UBE2L3	P68036	1|0|2	1|1|1|1|1|1|1|0|1|1|1|2|0|1|2|2|1	1	0.94	0.198955	0.04	0.5	0.119477	FALSE
nsp2_nature	EEF1A1	P68104	0|0|1	0|1|1|1|1|0|0|1|0|0|0|0|0|0|2|1|0	0.33	0.71	0.015716	0	0.71	0.00785802	FALSE
nsp2_nature	TUBB4B	P68371	1|0|0	1|0|1|1|1|0|0|1|0|0|0|1|1|0|1|1|1	0.33	0.57	0.00881765	0	0.71	0.00440883	FALSE
nsp2_nature	RPP30	P78346	1|1|1	0|0|0|1|1|1|1|0|0|0|0|2|1|2|1|1|1	1	1.42	0.338251	0	0.71	0.169125	FALSE
nsp2_nature	GTF2I	P78347	1|1|1	1|1|3|1|1|0|0|0|1|0|0|1|1|1|3|7|3	1	0.71	0.348916	0	0.71	0.174458	FALSE
nsp2_nature	CCT2	P78371	4|5|6	0|1|1|2|1|0|0|1|1|0|1|11|9|6|10|11|6	5	1.39	0.332919	0	0.6	0.16646	FALSE
nsp2_nature	PRKDC	P78527	1|0|0	0|0|3|2|0|0|0|1|0|0|0|7|3|7|6|10|9	0.33	0.12	0.000517889	0	0.71	0.000258945	FALSE
nsp2_nature	NTHL1	P78549	3|3|4	2|3|3|3|3|1|0|0|3|2|1|1|2|2|1|2|3	3.33	1.77	0.353661	0.06	0.48	0.20683	FALSE
nsp2_nature	MRPS11	P82912	3|4|3	2|2|3|3|3|3|1|1|2|1|2|2|2|2|3|3|2	3.33	1.53	0.339032	0.02	0.53	0.179516	FALSE
nsp2_nature	MRPS21	P82921	2|1|0	1|0|1|1|1|1|0|1|1|0|2|2|2|0|1|1|1	1	1.06	0.219141	0.06	0.49	0.139571	FALSE
nsp2_nature	SARNP	P82979	0|0|1	0|0|0|2|0|0|0|0|0|0|0|3|2|0|2|0|0	0.33	0.63	0.0161974	0	0.71	0.0080987	FALSE
nsp2_nature	RPL24	P83731	8|4|3	3|2|4|7|4|3|4|5|6|4|3|5|5|5|5|5|5	5	1.13	0.314874	0	0.62	0.157437	FALSE
nsp2_nature	RPL36A	P83881	0|0|2	2|3|2|2|1|2|3|1|2|2|3|1|2|0|2|1|2	0.67	0.37	0.0076894	0	0.6	0.0038447	FALSE
nsp2_nature	CBX1	P83916	1|0|0	0|0|0|3|0|0|0|0|0|0|0|0|0|0|0|0|0	0.33	1.89	0.197068	0	0.71	0.0985341	FALSE
nsp2_nature	ERH	P84090	2|1|2	1|2|3|4|3|3|2|2|4|2|1|1|1|2|2|2|1	1.67	0.79	0.320482	0	0.71	0.160241	FALSE
nsp2_nature	RPL19	P84098	4|2|3	1|7|4|5|1|0|2|2|5|3|5|2|1|1|2|2|1	3	1.16	0.32762	0.01	0.59	0.16881	FALSE
nsp2_nature	SERF2	P84101	2|1|2	1|2|1|3|1|3|1|0|1|2|3|3|3|1|1|1|0	1.67	1.05	0.321412	0.02	0.55	0.170706	FALSE
nsp2_nature	SRSF3	P84103	8|6|10	7|7|10|10|6|6|5|9|4|2|7|11|10|6|10|9|8	8	1.07	0.32693	0	0.68	0.163465	FALSE
nsp2_nature	RBM3	P98179	1|0|0	0|1|2|0|0|0|0|0|0|0|0|0|0|0|0|0|0	0.33	1.89	0.091953	0	0.71	0.0459765	FALSE
nsp2_nature	MPP1	Q00013	0|1|1	4|0|1|1|0|0|0|0|1|2|2|3|1|1|1|1|1	0.67	0.6	0.240077	0	0.71	0.120039	FALSE
nsp2_nature	TFAM	Q00059	6|4|4	2|6|4|4|3|2|2|4|4|3|2|5|4|6|7|8|4	4.67	1.13	0.343309	0	0.64	0.171654	FALSE
nsp2_nature	SLC25A3	Q00325	2|1|1	2|1|1|1|1|0|0|3|1|0|1|1|1|1|3|2|1	1.33	1.13	0.303991	0.03	0.52	0.166995	FALSE
nsp2_nature	CDK5	Q00535	0|2|2	0|0|1|1|0|0|0|0|1|0|1|1|0|1|0|0|0	1.33	3.78	0.275141	0.44	0.14	0.35757	FALSE
nsp2_nature	FKBP3	Q00688	3|2|16	4|7|2|12|7|3|2|3|2|9|7|15|12|8|20|13|6	7	0.9	0.224802	0	0.64	0.112401	FALSE
nsp2_nature	HNRNPU	Q00839	24|0|0	2|22|18|12|3|2|2|0|11|0|0|5|3|4|15|5|7	8	1.23	0.0368596	0.23	0.35	0.13343	FALSE
nsp2_nature	SET	Q01105	2|2|3	0|3|4|2|4|1|1|3|0|0|1|2|2|3|4|4|3	2.33	1.07	0.330545	0	0.6	0.165273	FALSE
nsp2_nature	SRSF2	Q01130	2|2|5	3|4|2|5|5|3|2|3|4|4|4|7|5|7|6|6|5	3	0.68	0.301765	0	0.66	0.150882	FALSE
nsp2_nature	EWSR1	Q01844	5|3|2	2|0|0|0|1|3|1|2|2|0|2|5|3|3|2|2|3	3.33	1.83	0.326865	0.15	0.41	0.238433	FALSE
nsp2_nature	RPL18A	Q02543	5|1|1	1|3|3|4|0|1|1|0|1|0|1|2|0|0|2|1|0	2.33	1.98	0.263081	0.27	0.32	0.26654	FALSE
nsp2_nature	FKBP4	Q02790	0|0|1	0|0|0|0|0|1|0|0|1|2|0|0|1|0|0|0|0	0.33	1.13	0.027118	0	0.71	0.013559	FALSE
nsp2_nature	RPL6	Q02878	9|0|0	0|5|2|4|0|0|0|0|3|0|0|0|0|0|0|0|0	3	3.64	0.0285659	0.32	0.22	0.174283	FALSE
nsp2_nature	LMNB2	Q03252	13|7|3	0|1|1|1|0|0|0|0|1|0|0|0|0|0|0|0|0	7.67	32.58	0.473946	0.98	0	0.726973	FALSE
nsp2_nature	SRSF11	Q05519	2|2|4	6|5|1|4|4|5|4|3|5|3|8|10|9|8|10|5|8	2.67	0.46	0.309561	0	0.71	0.154781	FALSE
nsp2_nature	PTPN11	Q06124	0|0|1	2|0|1|1|0|0|0|1|2|2|2|1|2|1|1|3|1	0.33	0.28	0.0187232	0	0.71	0.00936162	FALSE
nsp2_nature	PRDX1	Q06830	9|7|5	8|5|9|9|6|5|5|4|10|7|5|6|4|9|4|6|3	7	1.13	0.327199	0	0.67	0.163599	FALSE
nsp2_nature	RPL18	Q07020	4|0|0	1|4|2|2|0|0|1|0|2|0|0|0|0|0|1|0|0	1.33	1.74	0.0172313	0.25	0.33	0.133616	FALSE
nsp2_nature	C1QBP	Q07021	2|1|0	0|1|1|2|1|0|2|1|0|0|1|3|4|2|3|5|3	1	0.59	0.197125	0.01	0.59	0.103563	FALSE
nsp2_nature	CKAP4	Q07065	1|1|0	0|0|0|0|0|0|0|0|0|0|0|0|0|0|0|2|1	0.67	3.78	0.217987	0	0.71	0.108994	FALSE
nsp2_nature	KHDRBS1	Q07666	3|1|2	1|2|2|2|1|0|1|1|2|0|0|0|0|0|2|1|0	2	2.27	0.332708	0.24	0.35	0.286354	FALSE
nsp2_nature	SOS1	Q07889	1|0|0	0|0|0|0|0|0|0|0|0|0|0|0|0|0|0|0|0	0.33	3.33	0.0462977	0	0.71	0.0231488	FALSE
nsp2_nature	SRSF1	Q07955	3|0|4	1|4|5|15|3|2|0|1|5|3|1|6|5|2|6|6|5	2.33	0.57	0.209077	0	0.71	0.104538	FALSE
nsp2_nature	SRSF4	Q08170	2|0|1	0|1|1|1|0|1|0|1|0|1|0|1|0|0|0|0|0	1	2.43	0.224597	0.19	0.38	0.207299	FALSE
nsp2_nature	PPP3CA	Q08209	2|1|0	2|2|0|0|0|3|0|0|1|2|2|4|5|2|3|6|2	1	0.5	0.212309	0	0.71	0.106154	FALSE
nsp2_nature	DHX9	Q08211	18|0|0	0|12|10|6|0|0|0|0|2|0|0|1|0|0|5|0|0	6	2.83	0.0443295	0.32	0.22	0.182165	FALSE
nsp2_nature	SSRP1	Q08945	9|0|0	0|9|5|8|0|0|0|0|2|0|0|1|1|0|1|0|0	3	1.89	0.0646013	0.28	0.32	0.172301	FALSE
nsp2_nature	NSUN2	Q08J23	0|0|1	0|0|0|0|0|0|0|0|0|0|0|9|1|0|8|0|0	0.33	0.31	0.0742127	0	0.71	0.0371063	FALSE
nsp2_nature	RBBP4	Q09028	2|0|0	0|1|2|1|0|0|0|0|1|1|0|1|1|0|2|2|2	0.67	0.81	0.0307839	0.08	0.46	0.0553919	FALSE
nsp2_nature	AHNAK	Q09666	1|0|1	0|0|0|0|0|0|0|0|0|0|0|0|0|1|0|0|0	0.67	6.67	0.308633	0	0.71	0.154316	FALSE
nsp2_nature	LAMTOR4	Q0VGL1	0|0|1	0|0|0|0|0|0|0|0|0|0|0|0|0|0|0|0|0	0.33	3.33	0.19009	0	0.71	0.095045	FALSE
nsp2_nature	WASHC5	Q12768	1|0|3	0|0|0|0|0|0|0|0|0|0|0|0|0|0|0|0|0	1.33	13.33	0.837279	0.33	0.19	0.583639	FALSE
nsp2_nature	CDC20	Q12834	3|2|0	3|1|2|0|0|1|0|1|1|1|0|0|0|0|2|0|0	1.67	2.36	0.24823	0.32	0.21	0.284115	FALSE
nsp2_nature	ILF2	Q12905	7|0|0	0|3|0|2|0|0|0|0|2|0|0|0|0|0|1|0|0	2.33	4.96	0.0534801	0.33	0.21	0.19174	FALSE
nsp2_nature	ILF3	Q12906	12|0|0	0|4|4|4|0|0|0|0|1|0|0|0|0|0|3|0|0	4	4.25	0.050449	0.33	0.21	0.190225	FALSE
nsp2_nature	ACACA	Q13085	37|35|40	146|147|50|45|48|92|104|34|143|88|105|138|136|138|45|56|54	37.33	0.4	0.319474	0	0.71	0.159737	FALSE
nsp2_nature	TARDBP	Q13148	2|0|0	1|2|1|0|0|0|0|0|0|0|0|0|0|0|1|0|0	0.67	2.27	0.00923965	0.24	0.34	0.12462	FALSE
nsp2_nature	HNRNPA0	Q13151	4|0|0	0|4|1|2|0|0|0|0|2|0|0|0|0|0|1|0|0	1.33	2.27	0.049313	0.27	0.32	0.159657	FALSE
nsp2_nature	CBX3	Q13185	4|0|2	0|2|1|7|0|0|0|0|0|0|0|3|1|0|3|0|0	2	2	0.296914	0.3	0.3	0.298457	FALSE
nsp2_nature	PSMD2	Q13200	0|1|1	0|0|2|1|1|1|0|0|0|0|0|0|0|0|0|1|2	0.67	1.42	0.215121	0	0.71	0.10756	FALSE
nsp2_nature	SRSF9	Q13242	2|0|0	0|0|1|6|0|0|0|0|0|0|0|0|0|0|0|0|0	0.67	1.62	0.0784446	0.24	0.35	0.159222	FALSE
nsp2_nature	SRSF6	Q13247	2|0|1	0|1|0|1|0|0|0|0|1|0|0|0|1|0|1|0|0	1	3.4	0.295376	0.24	0.34	0.267688	FALSE
nsp2_nature	TRIM28	Q13263	2|0|0	0|1|0|0|0|0|0|0|1|0|0|1|2|0|2|1|1	0.67	1.26	0.0158537	0.16	0.4	0.0879268	FALSE
nsp2_nature	GRB10	Q13322	0|0|1	0|0|1|0|0|0|0|0|0|1|0|1|2|0|0|0|0	0.33	1.13	0.141253	0	0.71	0.0706267	FALSE
nsp2_nature	EIF3I	Q13347	0|1|1	0|0|0|1|0|0|0|0|0|0|0|0|1|0|0|5|3	0.67	1.13	0.264856	0	0.71	0.132428	FALSE
nsp2_nature	PPIG	Q13427	2|0|2	0|1|1|2|1|1|1|1|1|2|2|5|6|3|5|6|6	1.33	0.52	0.242457	0	0.71	0.121229	FALSE
nsp2_nature	TCOF1	Q13428	6|5|4	2|3|4|5|4|5|6|4|9|6|8|6|5|0|6|5|4	5	1.04	0.330968	0	0.66	0.165484	FALSE
nsp2_nature	PDAP1	Q13442	6|2|10	5|6|4|8|6|5|1|2|4|6|4|7|8|6|7|5|4	6	1.16	0.291268	0	0.61	0.145634	FALSE
nsp2_nature	PRPF4B	Q13523	1|1|1	2|1|0|2|0|1|1|1|1|2|2|3|2|3|3|2|1	1	0.63	0.328148	0	0.71	0.164074	FALSE
nsp2_nature	PIN1	Q13526	4|3|3	3|4|4|2|3|3|3|1|4|4|4|2|2|2|3|2|3	3.33	1.16	0.338943	0	0.61	0.169472	FALSE
nsp2_nature	EIF4EBP1	Q13541	3|2|3	3|2|2|3|3|2|1|1|2|0|0|3|3|2|1|1|3	2.67	1.42	0.348891	0.03	0.53	0.189445	FALSE
nsp2_nature	ITPK1	Q13572	1|0|0	0|0|0|0|0|0|0|0|1|0|1|2|1|2|0|0|1	0.33	0.71	0.0281943	0	0.71	0.0140971	FALSE
nsp2_nature	SNW1	Q13573	2|1|1	1|3|0|5|3|0|0|1|3|2|1|7|6|2|7|4|1	1.33	0.49	0.312915	0	0.71	0.156457	FALSE
nsp2_nature	TRA2A	Q13595	2|0|0	0|0|1|1|0|0|0|0|0|0|0|0|0|0|0|0|0	0.67	5.67	0.150901	0.31	0.29	0.230451	FALSE
nsp2_nature	RAB32	Q13637	1|1|1	1|0|0|1|1|0|1|0|0|0|1|0|0|0|0|0|0	1	3.4	0.363202	0	0.71	0.181601	FALSE
nsp2_nature	FHL1	Q13642	2|1|2	0|1|4|4|2|0|0|1|1|0|0|1|3|0|6|4|1	1.67	1.01	0.341909	0.02	0.55	0.180954	FALSE
nsp2_nature	AAMP	Q13685	0|0|1	0|0|0|0|0|0|0|0|0|0|0|0|0|0|0|0|0	0.33	3.33	0.0794479	0	0.71	0.039724	FALSE
nsp2_nature	NCOA4	Q13772	0|0|1	0|0|0|0|0|0|0|0|0|0|0|0|0|0|0|0|0	0.33	3.33	0.68551	0	0.71	0.342755	FALSE
nsp2_nature	BYSL	Q13895	0|0|1	0|0|0|1|1|0|0|0|0|0|1|1|1|0|1|0|0	0.33	0.94	0.021054	0	0.71	0.010527	FALSE
nsp2_nature	CIRBP	Q14011	1|0|0	0|0|0|0|0|0|0|0|0|0|0|0|0|0|0|0|0	0.33	3.33	0.156081	0	0.71	0.0780403	FALSE
nsp2_nature	COX17	Q14061	3|4|4	5|2|5|4|5|1|3|3|5|2|3|2|2|1|2|3|2	3.67	1.25	0.328435	0	0.61	0.164217	FALSE
nsp2_nature	HNRNPD	Q14103	12|1|1	1|4|8|7|1|0|1|0|4|0|1|0|1|0|6|1|0	4.67	2.27	0.216458	0.3	0.3	0.258229	FALSE
nsp2_nature	VGLL4	Q14135	1|0|0	0|0|0|0|0|0|0|0|0|0|0|1|0|0|0|1|1	0.33	1.89	0.289023	0	0.71	0.144512	FALSE
nsp2_nature	BOP1	Q14137	1|0|0	0|0|0|0|0|0|0|0|0|0|0|0|0|0|0|0|0	0.33	3.33	0.0824068	0	0.71	0.0412034	FALSE
nsp2_nature	TFDP1	Q14186	0|0|1	0|0|0|1|0|0|1|0|0|0|0|0|0|0|0|0|0	0.33	2.83	0.073983	0	0.71	0.0369915	FALSE
nsp2_nature	CTTN	Q14247	3|2|3	4|3|5|1|0|2|0|0|3|3|3|8|4|2|3|4|3	2.67	0.94	0.341649	0	0.63	0.170824	FALSE
nsp2_nature	RCN2	Q14257	1|1|0	0|0|0|0|0|0|0|1|1|0|0|0|1|0|0|2|1	0.67	1.89	0.198903	0	0.71	0.0994517	FALSE
nsp2_nature	FAM50A	Q14320	0|0|3	0|0|0|3|0|0|0|0|0|0|0|2|1|0|4|0|0	1	1.7	0.0594404	0.23	0.35	0.14472	FALSE
nsp2_nature	FRG1	Q14331	12|12|15	8|12|11|12|14|10|10|10|12|3|5|9|10|8|15|17|13	13	1.23	0.33335	0	0.69	0.166675	FALSE
nsp2_nature	CAPRIN1	Q14444	3|2|1	1|1|0|1|2|2|0|0|2|0|1|2|3|0|2|3|2	2	1.55	0.330788	0.09	0.46	0.210394	FALSE
nsp2_nature	RBM39	Q14498	20|22|23	25|25|23|25|27|23|25|24|24|15|23|22|29|23|28|27|31	21.67	0.88	0.326812	0	0.71	0.163406	FALSE
nsp2_nature	PDIA5	Q14554	1|1|3	1|1|2|5|1|1|0|1|2|3|1|5|4|3|7|8|4	1.67	0.58	0.29514	0	0.64	0.14757	FALSE
nsp2_nature	MDC1	Q14676	2|0|0	0|1|1|0|0|0|0|0|0|0|0|0|0|0|0|0|0	0.67	5.67	0.0619989	0.31	0.29	0.185999	FALSE
nsp2_nature	RRP1B	Q14684	3|0|0	0|0|0|0|0|0|0|0|0|0|0|0|0|0|0|0|0	1	10	0.0197988	0.33	0.19	0.174899	FALSE
nsp2_nature	PDCD11	Q14690	1|0|0	0|0|0|0|0|0|0|0|0|0|0|0|0|0|0|0|0	0.33	3.33	0.00499007	0	0.71	0.00249504	FALSE
nsp2_nature	MESD	Q14696	0|0|2	0|0|0|3|1|0|0|0|0|0|0|6|2|2|4|4|1	0.67	0.49	0.0327148	0.03	0.53	0.0313574	FALSE
nsp2_nature	LBR	Q14739	3|2|0	0|0|0|0|0|0|0|0|0|0|0|0|0|0|0|0|0	1.67	16.67	0.287791	0.65	0.06	0.468896	FALSE
nsp2_nature	KIF22	Q14807	6|3|1	6|4|4|3|4|4|3|3|4|3|4|0|3|1|5|2|2	3.33	1.03	0.299384	0.01	0.58	0.154692	FALSE
nsp2_nature	KPNB1	Q14974	0|1|0	0|0|0|0|0|0|0|0|0|0|0|1|0|0|1|0|1	0.33	1.89	0.0096297	0	0.71	0.00481485	FALSE
nsp2_nature	NOLC1	Q14978	9|6|6	7|7|8|9|6|5|5|5|7|5|8|5|10|0|8|3|3	7	1.18	0.332723	0	0.66	0.166361	FALSE
nsp2_nature	EFTUD2	Q15029	1|0|0	0|0|0|0|0|0|0|0|0|0|0|0|0|1|0|0|0	0.33	3.33	0.0440527	0	0.71	0.0220263	FALSE
nsp2_nature	RRS1	Q15050	1|0|0	0|0|0|0|0|0|0|0|0|0|0|0|0|0|0|0|0	0.33	3.33	0.0280909	0	0.71	0.0140455	FALSE
nsp2_nature	WDR43	Q15061	1|0|0	0|1|1|0|0|0|0|0|0|0|0|0|0|0|0|0|0	0.33	2.83	0.106024	0	0.71	0.0530118	FALSE
nsp2_nature	PDIA6	Q15084	5|3|2	7|6|7|6|7|3|4|4|2|4|5|3|4|3|5|4|5	3.33	0.72	0.315002	0	0.67	0.157501	FALSE
nsp2_nature	PLEC	Q15149	1|0|0	0|0|0|0|0|0|0|0|0|1|0|0|0|0|0|0|0	0.33	3.33	0.0489658	0	0.71	0.0244829	FALSE
nsp2_nature	PPA1	Q15181	1|0|1	1|1|0|1|2|1|2|1|1|0|0|0|1|1|3|2|2	0.67	0.6	0.216764	0	0.71	0.108382	FALSE
nsp2_nature	NONO	Q15233	9|4|4	4|5|9|7|2|1|2|1|4|5|6|8|5|5|11|6|5	5.67	1.12	0.32374	0	0.63	0.16187	FALSE
nsp2_nature	PTPRK	Q15262	0|1|0	1|0|1|0|0|0|0|1|0|1|0|0|0|0|0|0|0	0.33	1.42	0.0469764	0	0.71	0.0234882	FALSE
nsp2_nature	PWP2	Q15269	1|0|0	0|0|0|0|0|0|0|0|0|0|0|0|0|0|0|0|0	0.33	3.33	0.0760793	0	0.71	0.0380397	FALSE
nsp2_nature	RNPS1	Q15287	2|0|0	0|1|2|2|0|0|0|0|1|0|0|0|0|0|1|0|0	0.67	1.62	0.0538062	0.19	0.38	0.121903	FALSE
nsp2_nature	PCBP1	Q15365	10|14|11	13|13|10|12|13|10|11|11|9|9|5|15|12|15|15|12|14	11.67	1	0.324764	0	0.7	0.162382	FALSE
nsp2_nature	PCBP2	Q15366	8|6|8	6|7|7|7|6|5|6|4|7|3|6|8|4|7|8|9|8	7.33	1.15	0.332144	0	0.68	0.166072	FALSE
nsp2_nature	ELOC	Q15369	1|0|1	0|0|0|0|0|0|0|0|0|0|0|1|0|1|0|1|0	0.67	3.78	0.216678	0	0.71	0.108339	FALSE
nsp2_nature	ELOB	Q15370	0|0|1	0|0|0|0|0|0|0|0|0|0|0|0|0|0|0|0|0	0.33	3.33	0.0262924	0	0.71	0.0131462	FALSE
nsp2_nature	SF3B3	Q15393	1|0|0	2|1|3|2|1|2|1|0|3|0|4|6|6|7|4|6|5	0.33	0.11	0.00458343	0	0.71	0.00229172	FALSE
nsp2_nature	CNN3	Q15417	4|4|4	6|2|4|4|4|3|2|4|5|3|3|4|4|2|4|2|3	4	1.15	0.336093	0	0.63	0.168047	FALSE
nsp2_nature	SAFB	Q15424	3|0|0	0|3|3|1|0|0|0|0|1|0|0|0|0|0|1|0|0	1	1.89	0.0586599	0.24	0.34	0.14933	FALSE
nsp2_nature	SHB	Q15464	1|0|1	1|0|1|0|0|0|0|0|2|0|0|1|3|0|0|0|1	0.67	1.26	0.254404	0	0.71	0.127202	FALSE
nsp2_nature	TCEA2	Q15560	0|0|1	1|0|1|1|0|0|0|0|0|1|0|0|0|0|0|0|0	0.33	1.42	0.118899	0	0.71	0.0594494	FALSE
nsp2_nature	SF1	Q15637	10|13|9	11|9|6|7|13|8|5|7|15|7|7|21|19|11|16|20|16	10.67	0.92	0.326132	0	0.7	0.163066	FALSE
nsp2_nature	HMGN3	Q15651	0|0|1	0|0|0|0|0|1|0|0|0|0|0|0|0|0|0|0|0	0.33	3.33	0.027459	0	0.71	0.0137295	FALSE
nsp2_nature	ELAVL1	Q15717	6|0|0	0|1|4|2|0|0|0|0|2|0|0|0|0|0|2|0|0	2	3.09	0.0641632	0.31	0.29	0.187082	FALSE
nsp2_nature	SLC1A5	Q15758	0|0|1	0|0|0|0|0|0|0|0|0|0|0|0|0|0|0|0|0	0.33	3.33	0.0054183	0	0.71	0.00270915	FALSE
nsp2_nature	TOMM34	Q15785	0|0|2	0|0|0|1|0|0|0|0|0|1|0|8|3|0|6|0|0	0.67	0.6	0.0420338	0.07	0.47	0.0560169	FALSE
nsp2_nature	CSRP2	Q16527	11|13|15	9|10|11|11|8|9|5|9|13|2|2|9|12|12|10|10|14	13	1.42	0.337177	0	0.68	0.168589	FALSE
nsp2_nature	SRSF7	Q16629	4|0|2	1|3|2|2|1|0|0|0|1|0|0|3|2|1|2|2|1	2	1.62	0.238707	0.2	0.37	0.219353	FALSE
nsp2_nature	CPSF6	Q16630	4|3|9	5|5|3|6|2|4|0|3|1|4|4|10|12|6|9|7|7	5.33	1.03	0.306817	0	0.63	0.153408	FALSE
nsp2_nature	UBE2S	Q16763	0|0|1	0|0|0|0|0|0|0|0|0|0|0|6|0|0|2|0|0	0.33	0.71	0.0284719	0	0.71	0.014236	FALSE
nsp2_nature	HAGH	Q16775	0|1|0	0|0|1|0|1|0|1|0|0|2|0|2|1|0|1|1|1	0.33	0.52	0.0295875	0	0.71	0.0147937	FALSE
nsp2_nature	WASHC4	Q2M389	2|4|5	0|0|0|0|0|0|0|0|0|0|0|0|0|0|0|0|0	3.67	36.67	0.972084	0.98	0	0.976042	TRUE
nsp2_nature	TSR1	Q2NL82	0|0|1	0|0|0|2|0|0|0|0|0|0|0|8|5|2|6|5|2	0.33	0.19	0.0126857	0	0.71	0.00634287	FALSE
nsp2_nature	CWF19L2	Q2TBE0	1|0|1	0|2|1|3|2|1|0|1|1|4|3|4|3|4|2|3|5	0.67	0.29	0.210336	0	0.71	0.105168	FALSE
nsp2_nature	C18orf21	Q32NC0	1|0|0	0|0|0|0|0|0|0|0|0|0|0|0|1|0|0|0|0	0.33	3.33	0.0571124	0	0.71	0.0285562	FALSE
nsp2_nature	TWISTNB	Q3B726	2|0|1	0|0|1|2|1|1|0|1|2|0|2|1|3|1|3|3|1	1	0.77	0.20331	0.02	0.54	0.111655	FALSE
nsp2_nature	LSM12	Q3MHD2	0|1|2	1|0|1|1|1|1|0|1|1|0|1|1|1|1|1|1|0	1	1.31	0.211117	0.1	0.45	0.155558	FALSE
nsp2_nature	TUBB8	Q3ZCM7	4|3|2	1|1|2|2|3|0|0|0|2|0|0|3|3|1|2|2|2	3	2.12	0.323466	0.19	0.37	0.256733	FALSE
nsp2_nature	TBC1D10B	Q4KMP7	1|2|2	1|0|0|1|1|0|1|0|0|1|1|4|0|0|1|3|0	1.67	2.02	0.325745	0.18	0.38	0.252872	FALSE
nsp2_nature	AMOT	Q4VCS5	2|1|0	0|0|0|0|0|0|0|0|0|0|0|0|2|1|1|3|2	1	1.89	0.217563	0.17	0.4	0.193781	FALSE
nsp2_nature	TMEM128	Q5BJH2	2|0|1	0|0|0|0|0|0|0|0|0|0|0|0|0|0|0|0|0	1	10	0.868512	0.32	0.22	0.594256	FALSE
nsp2_nature	FAM133B	Q5BKY9	5|2|4	1|5|4|5|6|4|6|6|2|0|4|4|4|3|5|6|4	3.67	0.9	0.3213	0	0.65	0.16065	FALSE
nsp2_nature	TECRL	Q5HYJ1	0|1|0	0|2|0|0|0|1|1|0|0|0|1|0|0|0|0|0|0	0.33	1.13	0.0208506	0	0.71	0.0104253	FALSE
nsp2_nature	FAM76B	Q5HYJ3	0|1|1	1|1|2|1|2|1|0|2|3|1|0|2|1|1|0|2|0	0.67	0.57	0.209381	0	0.71	0.104691	FALSE
nsp2_nature	WDR45B	Q5MNZ6	1|1|1	0|0|1|0|0|0|0|0|1|1|2|0|0|1|0|1|0	1	2.43	0.422753	0	0.71	0.211377	FALSE
nsp2_nature	ATAT1	Q5SQI0	0|1|0	1|0|1|0|0|0|0|0|0|0|0|0|0|0|0|0|0	0.33	2.83	0.0438769	0	0.71	0.0219385	FALSE
nsp2_nature	FKBP15	Q5T1M5	16|19|24	0|0|0|0|0|0|0|0|0|0|0|0|0|0|0|0|0	19.67	196.67	0.988034	1	0	0.994017	TRUE
nsp2_nature	IBA57	Q5T440	8|7|9	10|7|4|5|4|4|2|3|5|5|6|3|4|4|5|8|7	8	1.58	0.342868	0	0.62	0.171434	FALSE
nsp2_nature	ATAD3B	Q5T9A4	1|0|0	0|0|0|0|0|0|0|0|0|0|0|0|0|0|0|0|0	0.33	3.33	0.00228467	0	0.71	0.00114234	FALSE
nsp2_nature	PRPF38B	Q5VTL8	13|10|17	10|11|10|12|13|12|11|12|13|4|10|19|16|12|13|14|11	13.33	1.12	0.329346	0	0.7	0.164673	FALSE
nsp2_nature	ARL6IP4	Q66PJ3	5|5|6	2|3|9|5|4|4|2|2|4|2|2|8|10|8|9|7|10	5.33	1	0.34441	0	0.68	0.172205	FALSE
nsp2_nature	AMMECR1L	Q6DCA0	4|4|2	1|1|2|2|1|1|0|1|2|2|1|1|1|1|1|2|1	3.33	2.7	0.368814	0.38	0.15	0.374407	FALSE
nsp2_nature	CIAPIN1	Q6FI81	2|3|3	2|1|2|3|0|1|1|2|1|2|1|5|4|4|1|2|3	2.67	1.3	0.346996	0.01	0.56	0.178498	FALSE
nsp2_nature	SDE2	Q6IQ49	1|1|1	2|1|2|1|0|1|1|0|3|2|1|3|3|2|2|0|0	1	0.71	0.331298	0	0.71	0.165649	FALSE
nsp2_nature	NIPBL	Q6KC79	1|1|0	2|0|0|0|0|0|0|0|1|0|1|2|4|1|0|1|0	0.67	0.94	0.221017	0	0.71	0.110509	FALSE
nsp2_nature	PDE12	Q6L8Q7	1|4|0	0|0|1|0|0|0|0|0|0|0|0|0|1|1|0|0|0	1.67	9.44	0.315493	0.33	0.18	0.322747	FALSE
nsp2_nature	RPUSD3	Q6P087	4|3|3	2|1|7|4|2|1|2|2|6|3|1|0|0|1|1|1|1	3.33	1.62	0.334196	0.04	0.51	0.187098	FALSE
nsp2_nature	MRPL14	Q6P1L8	7|7|6	5|5|7|5|6|6|6|6|6|7|5|6|7|3|4|5|6	6.67	1.19	0.334179	0	0.67	0.167089	FALSE
nsp2_nature	TAF2	Q6P1X5	2|2|0	1|0|0|0|2|1|0|0|0|2|1|0|1|1|1|1|1	1.33	1.89	0.244942	0.22	0.36	0.232471	FALSE
nsp2_nature	PRPF8	Q6P2Q9	3|0|0	0|0|1|0|0|0|0|0|0|0|0|3|1|1|2|1|1	1	1.7	0.0439833	0.24	0.35	0.141992	FALSE
nsp2_nature	FAHD1	Q6P587	1|2|2	1|0|1|1|2|0|1|0|2|2|4|1|1|1|0|0|0	1.67	1.67	0.345975	0.1	0.45	0.222988	FALSE
nsp2_nature	RPL22L1	Q6P5R6	2|4|4	4|3|2|2|4|2|1|3|3|2|2|4|4|2|3|2|3	3.33	1.23	0.319498	0.01	0.59	0.164749	FALSE
nsp2_nature	CCDC137	Q6PK04	1|0|0	0|0|1|1|0|1|1|0|1|0|0|0|1|1|0|1|0	0.33	0.71	0.0199298	0	0.71	0.00996491	FALSE
nsp2_nature	MTHFD1L	Q6UB35	1|0|0	2|0|1|0|0|0|0|1|1|0|0|0|3|0|1|0|0	0.33	0.63	0.0118131	0	0.71	0.00590657	FALSE
nsp2_nature	GIGYF2	Q6Y7W6	46|32|43	0|0|0|0|0|0|0|0|0|0|0|0|0|0|0|0|0	40.33	403.33	0.767088	1	0	0.883544	TRUE
nsp2_nature	NKAPD1	Q6ZUT1	2|1|3	3|4|2|3|1|0|2|3|4|2|4|5|6|3|6|7|4	2	0.58	0.316878	0	0.71	0.158439	FALSE
nsp2_nature	FRA10AC1	Q70Z53	3|3|7	3|1|2|5|4|3|1|2|3|1|2|8|5|5|4|4|3	4.33	1.32	0.324791	0.02	0.54	0.172395	FALSE
nsp2_nature	RPS27L	Q71UM5	1|1|1	1|2|3|2|3|2|1|1|3|0|0|0|0|2|1|2|1	1	0.71	0.318958	0	0.71	0.159479	FALSE
nsp2_nature	DDX46	Q7L014	10|14|22	14|16|20|25|21|14|9|20|19|14|13|38|35|34|29|32|29	15.33	0.68	0.315978	0	0.71	0.157989	FALSE
nsp2_nature	DHX30	Q7L2E3	1|0|0	0|0|0|0|0|0|0|0|0|0|0|0|0|0|0|0|0	0.33	3.33	0.00738468	0	0.71	0.00369234	FALSE
nsp2_nature	PARS2	Q7L3T8	2|2|0	1|1|4|2|0|0|0|2|0|1|1|1|1|0|3|2|0	1.33	1.19	0.249287	0.07	0.48	0.159644	FALSE
nsp2_nature	RSRC2	Q7L4I2	5|3|4	4|4|6|6|5|4|4|4|5|3|6|9|10|7|8|9|8	4	0.67	0.327185	0	0.71	0.163592	FALSE
nsp2_nature	NUFIP2	Q7Z417	0|1|2	2|1|1|0|1|0|2|1|1|2|1|2|3|0|1|1|1	1	0.85	0.207543	0.03	0.52	0.118772	FALSE
nsp2_nature	IRF2BP2	Q7Z5L9	4|8|7	7|8|6|4|2|6|7|7|12|6|5|19|16|12|15|22|17	6.33	0.63	0.312546	0	0.71	0.156273	FALSE
nsp2_nature	RBBP6	Q7Z6E9	1|1|1	2|1|1|0|0|0|1|1|0|0|0|1|1|1|2|1|1	1	1.31	0.37515	0	0.71	0.187575	FALSE
nsp2_nature	YTHDF3	Q7Z739	1|0|0	0|0|0|0|0|0|0|0|1|0|0|1|2|1|0|0|0	0.33	1.13	0.124275	0	0.71	0.0621373	FALSE
nsp2_nature	CMC1	Q7Z7K0	2|3|2	4|1|1|0|1|3|2|0|2|2|1|3|4|1|3|2|2	2.33	1.24	0.332674	0.02	0.55	0.176337	FALSE
nsp2_nature	CENPV	Q7Z7K6	4|0|0	0|2|2|0|0|0|0|0|0|0|0|0|0|0|0|0|0	1.33	5.67	0.0860919	0.32	0.21	0.203046	FALSE
nsp2_nature	GLRX5	Q86SX6	0|1|0	1|0|2|2|0|0|0|0|0|0|1|2|0|1|2|1|1	0.33	0.44	0.0219068	0	0.71	0.0109534	FALSE
nsp2_nature	ISCA2	Q86U28	1|1|1	3|0|0|0|0|0|0|0|1|2|1|1|2|1|1|1|1	1	1.21	0.37356	0	0.71	0.18678	FALSE
nsp2_nature	PABPN1	Q86U42	2|0|0	0|0|0|0|0|0|0|0|3|0|0|0|0|0|0|0|0	0.67	3.78	0.080655	0.29	0.3	0.185327	FALSE
nsp2_nature	YRDC	Q86U90	4|6|2	4|3|5|5|3|0|0|1|5|1|1|4|0|3|4|5|5	4	1.39	0.318987	0.02	0.54	0.169493	FALSE
nsp2_nature	MTDH	Q86UE4	1|0|0	0|0|0|0|0|1|0|0|0|0|0|2|1|0|1|0|0	0.33	1.13	0.0400752	0	0.71	0.0200376	FALSE
nsp2_nature	ZNF598	Q86UK7	15|10|17	2|0|0|1|0|0|0|0|0|1|0|3|3|5|0|1|1	14	14	0.557525	0.99	0	0.773762	FALSE
nsp2_nature	NAA40	Q86UY6	1|0|1	0|1|0|1|1|1|0|1|1|0|0|1|1|1|0|0|0	0.67	1.26	0.254143	0	0.71	0.127071	FALSE
nsp2_nature	LUZP1	Q86V48	1|0|1	0|0|1|1|0|1|0|0|1|0|0|0|0|0|0|0|0	0.67	2.83	0.243469	0	0.71	0.121735	FALSE
nsp2_nature	ALYREF	Q86V81	4|3|5	1|8|3|3|1|0|2|0|4|1|1|0|0|0|1|0|0	4	2.72	0.349321	0.37	0.16	0.35966	FALSE
nsp2_nature	COA5	Q86WW8	1|2|0	1|1|0|2|0|0|0|0|2|0|0|1|0|0|0|1|0	1	2.12	0.221361	0.17	0.39	0.19568	FALSE
nsp2_nature	RPS19BP1	Q86WX3	2|2|1	2|0|1|2|0|2|3|2|0|2|1|3|1|2|1|2|1	1.67	1.13	0.31941	0.02	0.54	0.169705	FALSE
nsp2_nature	CIR1	Q86X95	4|2|2	2|1|2|0|1|2|3|2|1|2|2|1|1|1|1|3|2	2.67	1.68	0.341529	0.1	0.44	0.220765	FALSE
nsp2_nature	PTRH1	Q86Y79	2|3|3	3|2|0|1|2|0|0|0|0|1|1|0|0|1|0|1|1	2.67	3.49	0.35288	0.5	0.12	0.42644	FALSE
nsp2_nature	BRSK2	Q8IWQ3	2|6|1	1|3|2|1|2|2|3|1|3|2|2|4|4|3|5|3|3	3	1.16	0.274762	0.05	0.5	0.162381	FALSE
nsp2_nature	PHF6	Q8IWS0	17|18|21	14|16|20|22|22|16|10|18|14|9|5|25|22|19|24|23|24	18.67	1.05	0.328683	0	0.71	0.164341	FALSE
nsp2_nature	CHERP	Q8IWX8	13|16|14	22|20|10|9|12|8|13|9|20|11|10|25|27|24|21|26|13	14.33	0.87	0.329714	0	0.71	0.164857	FALSE
nsp2_nature	DNAJC10	Q8IXB1	10|20|14	13|12|14|19|12|9|8|6|15|10|10|10|12|13|14|12|14	14.67	1.23	0.324871	0	0.69	0.162436	FALSE
nsp2_nature	RAVER1	Q8IY67	3|3|3	3|3|2|1|1|3|2|2|4|0|0|10|9|9|2|7|5	3	0.81	0.337369	0	0.71	0.168684	FALSE
nsp2_nature	FTSJ3	Q8IY81	1|0|0	0|0|0|0|0|0|0|0|0|0|0|0|0|0|0|0|0	0.33	3.33	0.0211719	0	0.71	0.0105859	FALSE
nsp2_nature	SRRM1	Q8IYB3	2|2|3	1|1|2|4|2|1|0|0|1|0|3|3|5|2|5|3|2	2.33	1.13	0.333846	0.01	0.59	0.171923	FALSE
nsp2_nature	SMAP1	Q8IYB5	1|1|1	1|1|4|4|1|1|1|1|1|1|1|2|2|2|2|2|2	1	0.59	0.328373	0	0.71	0.164187	FALSE
nsp2_nature	TCEAL8	Q8IYN2	0|1|0	0|0|0|0|0|0|0|1|1|0|0|1|1|0|0|0|0	0.33	1.42	0.0553227	0	0.71	0.0276614	FALSE
nsp2_nature	SELENOH	Q8IZQ5	3|0|1	3|2|3|4|4|0|3|1|1|4|2|1|2|2|1|1|1	1.33	0.65	0.17929	0.01	0.59	0.094645	FALSE
nsp2_nature	RBIS	Q8N0T1	1|2|1	0|1|0|1|1|0|0|0|0|0|0|1|1|0|1|1|2	1.33	2.52	0.331422	0.16	0.4	0.245711	FALSE
nsp2_nature	CCAR2	Q8N163	0|0|1	0|0|0|0|1|0|1|0|0|0|0|0|1|0|0|0|1	0.33	1.42	0.0347472	0	0.71	0.0173736	FALSE
nsp2_nature	LRRC47	Q8N1G4	4|1|17	10|6|5|12|8|10|0|2|6|8|6|23|19|12|22|20|15	7.33	0.68	0.203607	0	0.69	0.101804	FALSE
nsp2_nature	NKAP	Q8N5F7	1|3|2	2|3|2|5|3|3|3|4|4|1|3|5|5|7|8|7|6	2	0.48	0.292737	0	0.71	0.146368	FALSE
nsp2_nature	CPSF7	Q8N684	2|0|3	2|3|0|3|2|2|0|1|1|2|2|6|4|2|7|3|2	1.67	0.67	0.214193	0	0.62	0.107097	FALSE
nsp2_nature	NATD1	Q8N6N6	2|1|1	1|0|1|0|1|1|1|1|1|0|0|0|0|0|0|0|0	1.33	3.24	0.351497	0.19	0.38	0.270749	FALSE
nsp2_nature	C12orf29	Q8N999	0|0|1	0|0|0|1|0|0|0|0|0|0|0|0|0|0|0|0|0	0.33	3.33	0.116423	0	0.71	0.0582117	FALSE
nsp2_nature	SREK1IP1	Q8N9Q2	12|9|12	7|11|10|13|9|10|10|11|10|2|4|8|10|8|10|12|12	11	1.19	0.328955	0	0.69	0.164478	FALSE
nsp2_nature	PRPF38A	Q8NAV1	2|3|5	3|3|1|4|3|3|3|2|4|1|2|6|5|3|6|6|3	3.33	0.98	0.315097	0	0.63	0.157548	FALSE
nsp2_nature	ZNF511	Q8NB15	1|1|0	2|0|0|0|0|0|0|0|0|0|0|0|0|0|0|0|0	0.67	5.67	0.422579	0	0.71	0.21129	FALSE
nsp2_nature	TXNDC5	Q8NBS9	7|8|4	9|3|8|5|5|5|1|5|7|2|2|5|5|4|5|6|5	6.33	1.31	0.330626	0	0.63	0.165313	FALSE
nsp2_nature	SERBP1	Q8NC51	11|14|8	11|9|11|10|4|5|5|6|5|6|8|11|9|8|13|5|7	11	1.41	0.325874	0	0.66	0.162937	FALSE
nsp2_nature	LSM14A	Q8ND56	1|3|4	2|2|3|1|3|1|2|1|0|0|0|2|2|1|1|0|2	2.67	1.97	0.311348	0.2	0.37	0.255674	FALSE
nsp2_nature	MAPK1IP1L	Q8NDC0	0|0|1	1|0|0|0|1|0|0|0|1|0|0|1|0|1|1|1|1	0.33	0.71	0.0338792	0	0.71	0.0169396	FALSE
nsp2_nature	C1orf131	Q8NDD1	5|3|3	2|5|4|4|1|1|2|2|1|2|1|0|1|1|3|0|0	3.67	2.08	0.353251	0.17	0.39	0.261626	FALSE
nsp2_nature	ABCF1	Q8NE71	13|12|20	17|15|13|16|15|14|9|9|14|9|12|22|15|17|24|22|21	15	0.97	0.331123	0	0.71	0.165562	FALSE
nsp2_nature	FBXO22	Q8NEZ5	5|2|2	3|3|4|4|4|2|2|3|2|3|6|4|5|8|2|2|2	3	0.86	0.321699	0	0.63	0.16085	FALSE
nsp2_nature	CMAS	Q8NFW8	2|0|0	0|0|1|2|2|0|0|0|1|1|2|1|0|0|0|0|0	0.67	1.13	0.0407951	0.14	0.42	0.0903976	FALSE
nsp2_nature	THOC2	Q8NI27	4|2|1	1|1|1|4|2|0|0|3|1|1|1|5|3|2|6|2|2	2.33	1.13	0.310703	0.02	0.53	0.165351	FALSE
nsp2_nature	RP9	Q8TA86	17|13|17	14|13|16|15|14|11|13|11|19|8|12|13|13|8|14|16|19	15.67	1.16	0.331125	0	0.7	0.165562	FALSE
nsp2_nature	GADD45GIP1	Q8TAE8	1|0|0	0|0|1|1|0|0|0|0|1|1|0|1|2|0|2|2|1	0.33	0.47	0.0319754	0	0.71	0.0159877	FALSE
nsp2_nature	FAM76A	Q8TAV0	2|1|2	3|1|0|0|2|2|0|2|1|1|1|2|4|2|3|2|2	1.67	1.01	0.333387	0.01	0.56	0.171693	FALSE
nsp2_nature	SLC25A40	Q8TBP6	0|0|1	0|0|1|0|0|0|0|0|0|0|0|0|0|0|0|0|0	0.33	3.33	0.0756577	0	0.71	0.0378288	FALSE
nsp2_nature	DTD1	Q8TEA8	0|0|1	1|1|0|1|1|1|0|0|0|0|0|1|0|0|1|1|0	0.33	0.71	0.0297991	0	0.71	0.0148995	FALSE
nsp2_nature	GANC	Q8TET4	2|0|0	1|2|1|1|0|1|0|1|1|1|1|1|1|0|0|1|1	0.67	0.81	0.0119746	0.08	0.46	0.0459873	FALSE
nsp2_nature	ZC3H15	Q8WU90	0|0|3	1|1|2|5|1|1|0|0|0|0|1|7|5|6|7|4|1	1	0.4	0.0217833	0	0.61	0.0108917	FALSE
nsp2_nature	PPIL4	Q8WUA2	5|4|11	8|10|8|11|8|7|2|3|8|4|7|18|12|7|14|15|10	6.67	0.75	0.30512	0	0.69	0.15256	FALSE
nsp2_nature	RNF138	Q8WVD3	0|0|2	0|1|0|3|0|0|0|0|1|0|1|1|2|0|2|1|2	0.67	0.81	0.0284158	0.08	0.47	0.0542079	FALSE
nsp2_nature	SNRNP27	Q8WVK2	6|9|5	8|4|9|9|8|6|4|6|6|8|7|7|9|10|12|8|11	6.67	0.86	0.314475	0	0.69	0.157237	FALSE
nsp2_nature	HNRNPLL	Q8WVV9	1|1|4	0|0|1|2|0|0|0|0|2|0|0|2|0|0|3|0|0	2	3.4	0.36247	0.28	0.32	0.321235	FALSE
nsp2_nature	ATXN2L	Q8WWM7	1|0|3	0|1|0|1|0|2|0|0|2|0|0|5|7|1|3|4|3	1.33	0.78	0.178275	0.03	0.53	0.104138	FALSE
nsp2_nature	SREK1	Q8WXA9	5|2|3	0|0|3|0|2|0|0|0|2|1|0|4|5|4|4|3|3	3.33	1.83	0.364851	0.14	0.42	0.252425	FALSE
nsp2_nature	DNAJC9	Q8WXX5	2|0|1	2|4|3|2|0|0|0|3|1|1|0|1|0|0|3|0|0	1	0.85	0.199936	0.03	0.52	0.114968	FALSE
nsp2_nature	DDX1	Q92499	2|0|1	1|1|0|2|2|1|0|0|1|3|0|2|0|0|1|0|0	1	1.21	0.197388	0.08	0.47	0.138694	FALSE
nsp2_nature	H1-10	Q92522	5|3|3	3|4|3|2|4|1|1|2|5|3|2|2|2|2|2|2|1	3.67	1.52	0.339195	0.03	0.52	0.184598	FALSE
nsp2_nature	PHF3	Q92576	1|0|0	2|1|1|1|2|1|0|0|1|0|0|2|0|0|1|0|1	0.33	0.44	0.0133706	0	0.71	0.00668529	FALSE
nsp2_nature	HSPH1	Q92598	3|3|6	0|0|0|1|1|0|0|0|0|0|0|0|2|2|1|3|2	4	5.67	0.326175	0.74	0.02	0.533087	FALSE
nsp2_nature	DDX17	Q92841	16|11|12	10|6|15|15|11|6|5|10|9|10|8|11|9|3|14|8|6	13	1.42	0.33761	0	0.67	0.168805	FALSE
nsp2_nature	KHSRP	Q92945	10|8|10	15|8|11|6|9|11|5|7|10|12|10|16|15|11|12|13|9	9.33	0.88	0.333734	0	0.71	0.166867	FALSE
nsp2_nature	EMG1	Q92979	0|0|1	0|0|0|0|0|0|0|0|0|0|0|3|1|0|3|0|0	0.33	0.81	0.0213811	0	0.71	0.0106906	FALSE
nsp2_nature	RPL36AL	Q969Q0	2|2|3	2|2|0|1|2|2|1|0|1|0|0|1|0|0|2|1|0	2.33	2.64	0.347645	0.31	0.3	0.328823	FALSE
nsp2_nature	FAM162A	Q96A26	0|0|1	0|0|0|0|0|0|0|0|0|0|0|0|0|0|0|0|0	0.33	3.33	0.0111581	0	0.71	0.00557906	FALSE
nsp2_nature	CCDC47	Q96A33	0|0|1	0|0|0|0|0|0|0|0|0|0|0|0|0|0|0|0|0	0.33	3.33	0.0118191	0	0.71	0.00590957	FALSE
nsp2_nature	ISOC2	Q96AB3	1|1|0	1|0|0|0|0|0|0|0|0|0|0|1|0|0|1|0|1	0.67	2.83	0.387608	0	0.71	0.193804	FALSE
nsp2_nature	FUBP1	Q96AE4	1|1|0	0|1|1|0|0|1|1|1|1|1|1|0|0|0|0|0|0	0.67	1.42	0.215212	0	0.71	0.107606	FALSE
nsp2_nature	LRRC59	Q96AG4	5|6|8	5|5|3|5|6|5|1|3|3|3|2|9|7|6|10|6|6	6.33	1.27	0.330593	0	0.64	0.165297	FALSE
nsp2_nature	RNF25	Q96BH1	0|1|1	1|0|1|0|1|0|1|0|0|0|1|0|0|0|0|0|2	0.67	1.62	0.232878	0	0.71	0.116439	FALSE
nsp2_nature	AIDA	Q96BJ3	0|0|2	0|0|0|0|0|0|0|0|0|0|0|4|1|0|1|0|0	0.67	1.89	0.178052	0.24	0.35	0.209026	FALSE
nsp2_nature	PINX1	Q96BK5	1|1|0	1|0|2|2|2|1|1|1|1|1|1|1|3|1|1|2|1	0.67	0.52	0.208598	0	0.71	0.104299	FALSE
nsp2_nature	CHCHD1	Q96BP2	0|0|1	0|0|0|0|0|0|0|0|0|0|0|0|0|0|1|0|0	0.33	3.33	0.0219888	0	0.71	0.0109944	FALSE
nsp2_nature	C12orf43	Q96C57	1|0|0	0|0|0|2|0|0|0|0|0|0|0|0|1|0|1|1|1	0.33	0.94	0.0279545	0	0.71	0.0139773	FALSE
nsp2_nature	CCDC124	Q96CT7	12|12|17	12|16|12|18|17|11|6|9|15|9|10|15|14|8|12|14|10	13.67	1.12	0.330995	0	0.7	0.165498	FALSE
nsp2_nature	MRRF	Q96E11	1|0|4	2|2|1|5|0|0|0|0|0|4|1|9|8|5|8|6|3	1.67	0.52	0.155295	0	0.63	0.0776476	FALSE
nsp2_nature	SPACA9	Q96E40	1|0|2	1|0|1|0|0|1|1|0|1|1|1|1|1|1|1|1|1	1	1.31	0.295921	0.1	0.45	0.197961	FALSE
nsp2_nature	OMA1	Q96E52	0|0|1	0|0|0|0|0|0|0|0|0|0|0|0|0|0|0|0|0	0.33	3.33	0.0338219	0	0.71	0.016911	FALSE
nsp2_nature	TCEAL4	Q96EI5	2|1|1	0|0|1|1|0|0|0|0|0|0|0|1|0|0|0|0|0	1.33	7.56	0.359966	0.29	0.31	0.324983	FALSE
nsp2_nature	GNPNAT1	Q96EK6	0|3|2	1|2|3|2|0|0|0|2|3|0|2|0|0|0|0|0|0	1.67	1.89	0.265367	0.24	0.34	0.252684	FALSE
nsp2_nature	DAZAP1	Q96EP5	1|1|0	0|0|0|0|0|0|0|0|0|0|0|1|0|2|1|0|1	0.67	2.27	0.241571	0	0.71	0.120786	FALSE
nsp2_nature	RBM33	Q96EV2	0|0|1	1|1|0|0|1|1|1|0|1|1|1|1|1|1|0|1|0	0.33	0.47	0.0154252	0	0.71	0.00771261	FALSE
nsp2_nature	TMA16	Q96EY4	7|11|11	11|8|11|10|9|7|10|9|12|8|10|6|10|8|9|10|12	9.67	1.03	0.325055	0	0.7	0.162528	FALSE
nsp2_nature	HMCES	Q96FZ2	0|0|1	0|0|0|1|0|0|0|0|0|0|0|0|0|0|0|0|0	0.33	3.33	0.0489107	0	0.71	0.0244553	FALSE
nsp2_nature	LTV1	Q96GA3	0|0|1	0|0|0|0|0|0|0|0|1|0|1|1|3|1|1|2|0	0.33	0.57	0.0256425	0	0.71	0.0128212	FALSE
nsp2_nature	TOE1	Q96GM8	1|0|0	0|0|0|0|0|0|0|0|0|0|0|0|0|0|0|0|0	0.33	3.33	0.151219	0	0.71	0.0756094	FALSE
nsp2_nature	DDX27	Q96GQ7	2|0|0	0|1|0|0|0|0|0|0|0|0|0|0|0|0|0|0|0	0.67	6.67	0.0476053	0.32	0.22	0.183803	FALSE
nsp2_nature	ATXN7L3B	Q96GX2	1|1|0	0|0|0|0|0|0|0|0|1|0|0|2|1|1|0|1|0	0.67	1.89	0.411869	0	0.71	0.205935	FALSE
nsp2_nature	APIP	Q96GX9	0|0|1	0|0|0|0|0|0|0|0|0|0|0|0|0|0|0|0|0	0.33	3.33	0.108536	0	0.71	0.0542681	FALSE
nsp2_nature	ZC3HAV1L	Q96H79	10|8|8	6|4|10|8|6|5|3|6|10|3|4|9|10|9|9|11|8	8.67	1.22	0.334867	0	0.68	0.167433	FALSE
nsp2_nature	FUBP3	Q96I24	30|31|31	23|25|26|20|18|24|17|15|21|24|18|37|44|33|26|31|32	30.67	1.2	0.334781	0	0.71	0.167391	FALSE
nsp2_nature	RBM17	Q96I25	6|4|4	8|13|6|5|4|8|10|4|13|6|8|13|14|14|7|8|6	4.67	0.54	0.324503	0	0.71	0.162252	FALSE
nsp2_nature	ATP5MD	Q96IX5	1|0|1	0|0|0|0|0|0|0|0|0|0|0|0|0|0|1|0|0	0.67	6.67	0.207396	0	0.71	0.103698	FALSE
nsp2_nature	RSRC1	Q96IZ7	3|1|3	2|2|3|0|1|3|2|1|4|1|2|2|3|3|3|4|3	2.33	1.02	0.327924	0.01	0.59	0.168962	FALSE
nsp2_nature	THOC3	Q96J01	2|4|4	2|4|1|0|2|1|3|0|4|3|3|9|6|7|5|5|3	3.33	0.98	0.323184	0	0.63	0.161592	FALSE
nsp2_nature	TCEANC2	Q96MN5	3|2|2	2|1|2|2|1|1|0|1|3|1|1|2|3|1|1|3|2	2.33	1.47	0.350402	0.04	0.5	0.195201	FALSE
nsp2_nature	ZMAT2	Q96NC0	2|3|2	0|1|2|0|3|1|1|2|1|0|1|4|1|3|3|3|1	2.33	1.47	0.352485	0.04	0.5	0.196243	FALSE
nsp2_nature	NSUN5	Q96P11	1|1|1	1|0|1|0|0|0|0|0|0|0|0|0|0|0|0|0|0	1	8.5	0.460157	0	0.71	0.230079	FALSE
nsp2_nature	RBM14	Q96PK6	5|0|0	0|6|5|3|0|0|0|0|0|1|0|1|2|1|1|1|1	1.67	1.29	0.00721026	0.22	0.36	0.113605	FALSE
nsp2_nature	VPS35	Q96QK1	0|1|1	0|0|0|0|0|0|0|0|0|0|0|0|0|0|0|0|0	0.67	6.67	0.879733	0	0.71	0.439867	FALSE
nsp2_nature	MCCC1	Q96RQ3	20|23|17	34|23|11|8|3|14|15|1|28|20|22|27|29|35|5|4|8	20	1.18	0.334632	0	0.71	0.167316	FALSE
nsp2_nature	CDK5RAP2	Q96SN8	0|0|1	0|0|0|0|0|0|0|0|0|0|0|0|0|0|0|0|0	0.33	3.33	0.00385153	0	0.71	0.00192577	FALSE
nsp2_nature	MAP7D2	Q96T17	1|2|1	2|1|0|1|0|1|0|1|2|1|0|1|1|0|0|1|1	1.33	1.74	0.329035	0.1	0.45	0.214517	FALSE
nsp2_nature	CNN2	Q99439	1|2|2	4|0|2|2|2|2|0|1|1|1|1|0|3|1|1|2|5	1.67	1.01	0.331622	0.01	0.56	0.170811	FALSE
nsp2_nature	CDC5L	Q99459	1|0|0	0|1|1|0|0|0|0|0|1|0|0|0|1|0|1|0|0	0.33	1.13	0.00861772	0	0.71	0.00430886	FALSE
nsp2_nature	PSMD1	Q99460	0|0|1	0|0|0|0|0|0|0|0|0|0|0|0|0|0|0|0|0	0.33	3.33	0.0385888	0	0.71	0.0192944	FALSE
nsp2_nature	PARK7	Q99497	28|28|25	35|20|25|24|17|18|21|17|29|15|18|28|32|24|26|26|26	27	1.14	0.331468	0	0.71	0.165734	FALSE
nsp2_nature	DNAJC2	Q99543	0|0|1	0|0|0|2|0|0|0|0|0|0|0|3|2|1|1|1|0	0.33	0.57	0.0531446	0	0.71	0.0265723	FALSE
nsp2_nature	DNAJC7	Q99615	0|0|1	0|0|0|1|0|0|1|0|1|0|1|5|3|1|4|2|0	0.33	0.3	0.00420863	0	0.71	0.00210431	FALSE
nsp2_nature	PHB2	Q99623	5|1|3	7|8|6|9|5|3|4|8|4|6|6|12|10|8|11|8|11	3	0.4	0.282941	0	0.71	0.14147	FALSE
nsp2_nature	KIF2C	Q99661	1|2|1	1|0|0|2|0|0|0|0|0|0|0|1|0|0|2|2|1	1.33	2.52	0.356621	0.16	0.41	0.25831	FALSE
nsp2_nature	HSD17B10	Q99714	3|0|1	4|1|2|1|1|0|0|0|1|2|0|5|4|0|3|1|2	1.33	0.84	0.196057	0.03	0.52	0.113028	FALSE
nsp2_nature	HNRNPAB	Q99729	3|0|0	0|2|2|2|0|0|0|0|1|0|0|0|0|0|1|0|0	1	2.12	0.0724774	0.26	0.32	0.166239	FALSE
nsp2_nature	CCT7	Q99832	2|2|4	0|1|1|1|0|0|0|0|1|0|0|7|9|6|9|10|10	2.67	0.82	0.32404	0	0.63	0.16202	FALSE
nsp2_nature	PRMT1	Q99873	0|1|3	1|0|0|1|0|0|0|0|0|0|2|1|1|1|0|0|1	1.33	2.83	0.379255	0.27	0.32	0.324627	FALSE
nsp2_nature	VRK1	Q99986	2|0|2	0|1|0|4|0|0|0|0|0|0|0|5|3|0|9|1|0	1.33	0.99	0.227859	0.07	0.48	0.14893	FALSE
nsp2_nature	TRIR	Q9BQ61	1|1|2	0|0|2|1|0|0|1|0|1|1|0|1|2|0|1|0|1	1.33	2.06	0.326506	0.13	0.42	0.228253	FALSE
nsp2_nature	MACROD1	Q9BQ69	0|0|2	1|2|0|2|1|1|0|0|1|1|1|3|5|3|5|3|2	0.67	0.37	0.0134698	0	0.6	0.00673489	FALSE
nsp2_nature	MYBBP1A	Q9BQG0	1|0|0	0|0|0|0|1|0|0|0|0|0|0|3|0|1|1|1|1	0.33	0.71	0.00331487	0	0.71	0.00165743	FALSE
nsp2_nature	NUDT16L1	Q9BRJ7	5|6|3	1|3|4|2|4|2|2|2|2|2|4|1|3|3|3|3|2	4.67	1.84	0.328259	0.08	0.47	0.204129	FALSE
nsp2_nature	PDCD2L	Q9BRP1	2|1|2	2|2|2|2|3|2|2|2|1|1|3|1|5|4|4|3|5	1.67	0.64	0.321214	0	0.71	0.160607	FALSE
nsp2_nature	PYM1	Q9BRP8	0|0|4	0|1|1|6|1|1|0|0|0|1|1|5|4|3|4|1|0	1.33	0.78	0.0363196	0.07	0.48	0.0531598	FALSE
nsp2_nature	RIOK1	Q9BRS2	0|0|2	0|1|1|2|1|0|0|2|0|0|1|4|4|3|6|6|4	0.67	0.32	0.0187449	0	0.71	0.00937243	FALSE
nsp2_nature	PELO	Q9BRX2	6|7|4	7|4|8|11|5|5|3|5|6|5|5|6|6|2|7|4|3	5.67	1.05	0.320967	0	0.67	0.160483	FALSE
nsp2_nature	NTPCR	Q9BSD7	8|8|6	8|6|10|8|7|7|5|8|9|6|5|6|6|4|7|6|5	7.33	1.1	0.331231	0	0.68	0.165616	FALSE
nsp2_nature	TACO1	Q9BSH4	0|0|1	0|0|0|2|0|0|0|0|0|1|1|4|2|1|7|2|0	0.33	0.28	0.016787	0	0.71	0.00839349	FALSE
nsp2_nature	HDHD3	Q9BSH5	0|2|0	1|0|0|1|1|0|0|0|1|0|0|0|1|1|0|0|0	0.67	1.89	0.0846615	0.22	0.36	0.152331	FALSE
nsp2_nature	MTG1	Q9BT17	1|1|1	1|0|1|1|2|0|0|0|1|1|0|1|0|1|2|1|1	1	1.31	0.346574	0	0.71	0.173287	FALSE
nsp2_nature	DCUN1D5	Q9BTE7	3|4|1	2|2|2|2|2|1|1|0|2|0|1|5|3|2|4|4|3	2.67	1.26	0.300578	0.02	0.53	0.160289	FALSE
nsp2_nature	TMEM43	Q9BTV4	0|2|0	0|0|0|0|0|0|0|0|0|0|0|0|0|0|0|0|0	0.67	6.67	0.0152974	0.32	0.22	0.167649	FALSE
nsp2_nature	C1orf35	Q9BU76	7|12|10	10|9|11|10|8|8|8|8|11|6|8|10|9|6|5|7|10	9.67	1.14	0.323476	0	0.69	0.161738	FALSE
nsp2_nature	TUBB6	Q9BUF5	0|1|0	0|0|0|0|0|0|0|0|0|0|0|0|0|0|1|0|0	0.33	3.33	0.00344329	0	0.71	0.00172164	FALSE
nsp2_nature	HNRNPUL1	Q9BUJ2	2|0|0	0|0|0|0|0|0|0|0|0|0|0|0|0|0|0|0|0	0.67	6.67	0.0225754	0.32	0.22	0.171288	FALSE
nsp2_nature	ADI1	Q9BV57	0|1|0	0|0|0|0|0|0|0|0|0|0|0|0|0|1|0|0|1	0.33	2.83	0.240229	0	0.71	0.120115	FALSE
nsp2_nature	PBDC1	Q9BVG4	1|0|0	0|0|0|0|0|0|0|0|0|0|0|0|0|0|0|0|0	0.33	3.33	0.100665	0	0.71	0.0503326	FALSE
nsp2_nature	UTP14A	Q9BVJ6	1|0|0	0|0|0|0|0|0|0|0|0|0|0|0|0|0|0|0|0	0.33	3.33	0.0624817	0	0.71	0.0312409	FALSE
nsp2_nature	TMED9	Q9BVK6	0|1|0	0|0|0|0|0|0|0|0|0|0|0|0|0|0|0|0|0	0.33	3.33	0.0228869	0	0.71	0.0114435	FALSE
nsp2_nature	GNL3	Q9BVP2	3|0|0	0|1|0|0|0|0|0|0|0|0|0|2|1|0|1|0|0	1	3.4	0.0232624	0.31	0.3	0.166631	FALSE
nsp2_nature	KIFC1	Q9BW19	2|2|0	1|0|1|0|0|0|0|0|1|2|1|0|0|0|0|0|0	1.33	3.78	0.235822	0.45	0.14	0.342911	FALSE
nsp2_nature	REPIN1	Q9BWE0	0|1|2	1|1|1|1|1|0|1|0|3|2|1|2|2|0|1|1|2	1	0.85	0.227828	0.03	0.52	0.128914	FALSE
nsp2_nature	CHID1	Q9BWS9	2|2|4	2|2|1|4|0|0|0|0|1|2|1|7|5|2|7|4|0	2.67	1.19	0.346519	0.02	0.55	0.18326	FALSE
nsp2_nature	RTF2	Q9BY42	2|3|3	2|3|4|3|3|1|2|1|3|3|2|4|5|0|3|3|3	2.67	1.01	0.330896	0	0.62	0.165448	FALSE
nsp2_nature	EIF2A	Q9BY44	0|0|7	0|0|0|6|1|1|0|0|0|1|0|11|7|1|9|2|1	2.33	0.99	0.0618744	0.15	0.41	0.105937	FALSE
nsp2_nature	POLDIP3	Q9BY77	3|2|3	2|2|1|3|1|0|0|0|1|1|1|1|1|1|3|0|0	2.67	2.52	0.358704	0.29	0.31	0.324352	FALSE
nsp2_nature	GNB1L	Q9BYB4	12|10|8	8|7|5|11|10|10|4|5|7|1|3|4|5|6|7|6|9	10	1.57	0.346442	0	0.63	0.173221	FALSE
nsp2_nature	MRPL32	Q9BYC8	2|1|2	1|1|0|2|0|1|2|0|1|0|1|0|0|1|1|1|0	1.67	2.36	0.34015	0.22	0.36	0.280075	FALSE
nsp2_nature	NIFK	Q9BYG3	1|0|0	0|0|0|0|0|0|0|0|0|0|0|0|0|0|0|0|0	0.33	3.33	0.0162357	0	0.71	0.00811787	FALSE
nsp2_nature	GTPBP4	Q9BZE4	6|2|5	1|4|5|3|5|2|1|3|3|0|0|5|3|3|4|9|4	4.33	1.34	0.332514	0.01	0.57	0.171257	FALSE
nsp2_nature	UPF3B	Q9BZI7	0|2|2	0|2|0|2|4|0|0|1|1|1|1|3|1|1|3|3|2	1.33	0.91	0.231115	0.02	0.54	0.125558	FALSE
nsp2_nature	UBL5	Q9BZL1	1|1|1	0|0|0|1|0|0|0|0|0|1|0|2|2|0|1|2|0	1	1.89	0.343724	0	0.71	0.171862	FALSE
nsp2_nature	UCK2	Q9BZX2	1|0|0	0|0|0|0|0|0|0|0|0|0|0|0|0|0|0|0|0	0.33	3.33	0.0136878	0	0.71	0.00684388	FALSE
nsp2_nature	ROGDI	Q9GZN7	0|0|1	1|0|0|0|0|0|0|0|0|0|0|0|0|0|0|0|0	0.33	3.33	0.0225446	0	0.71	0.0112723	FALSE
nsp2_nature	PITHD1	Q9GZP4	2|3|2	3|2|2|1|1|1|2|1|2|0|1|1|1|2|1|2|2	2.33	1.59	0.335166	0.06	0.48	0.197583	FALSE
nsp2_nature	EGLN1	Q9GZT9	1|1|0	0|0|1|0|1|0|0|0|0|0|0|0|1|0|1|0|0	0.67	2.83	0.260947	0	0.71	0.130473	FALSE
nsp2_nature	CLPB	Q9H078	0|0|1	0|0|0|0|0|0|0|0|0|0|0|6|2|0|3|1|0	0.33	0.47	0.00696437	0	0.71	0.00348218	FALSE
nsp2_nature	NAT10	Q9H0A0	1|1|1	0|1|1|0|0|1|1|0|1|0|0|1|0|1|0|0|0	1	2.43	0.325339	0	0.71	0.16267	FALSE
nsp2_nature	ILKAP	Q9H0C8	2|1|0	2|2|1|0|0|0|0|0|1|1|0|2|3|1|0|0|1	1	1.21	0.22099	0.08	0.47	0.150495	FALSE
nsp2_nature	NSRP1	Q9H0G5	1|0|1	1|0|0|0|0|0|0|0|0|0|0|2|3|1|2|1|1	0.67	1.03	0.273161	0	0.71	0.13658	FALSE
nsp2_nature	DDX47	Q9H0S4	2|2|5	2|3|2|2|4|1|0|3|2|1|3|2|3|3|4|3|2	3	1.27	0.307278	0.03	0.52	0.168639	FALSE
nsp2_nature	PCDHAC1	Q9H158	1|0|0	0|0|0|0|0|0|0|0|0|0|0|0|0|0|0|0|0	0.33	3.33	0.027461	0	0.71	0.0137305	FALSE
nsp2_nature	IRF2BPL	Q9H1B7	1|0|0	0|0|0|0|0|0|0|0|0|0|0|2|3|0|1|1|1	0.33	0.71	0.0327817	0	0.71	0.0163908	FALSE
nsp2_nature	NUCKS1	Q9H1E3	1|0|2	1|1|0|3|1|0|0|0|1|1|0|3|0|0|3|1|0	1	1.13	0.212755	0.08	0.47	0.146378	FALSE
nsp2_nature	CARD9	Q9H257	1|1|1	1|0|0|0|0|0|0|0|0|0|1|1|1|1|0|0|0	1	3.4	0.353608	0	0.71	0.176804	FALSE
nsp2_nature	MTIF3	Q9H2K0	2|1|0	1|0|0|0|2|1|0|0|2|1|1|2|2|1|0|2|0	1	1.13	0.213738	0.07	0.48	0.141869	FALSE
nsp2_nature	DHX36	Q9H2U1	1|2|2	0|0|3|1|0|0|0|0|2|0|3|0|1|1|0|0|0	1.67	2.58	0.352433	0.28	0.32	0.316217	FALSE
nsp2_nature	PNN	Q9H307	5|0|0	0|2|4|3|0|2|1|0|0|0|1|1|1|0|2|0|0	1.67	1.67	0.0644793	0.27	0.32	0.16724	FALSE
nsp2_nature	C12orf65	Q9H3J6	1|1|2	1|1|1|1|0|1|0|1|1|0|2|0|0|1|1|0|1	1.33	1.89	0.339819	0.11	0.44	0.22491	FALSE
nsp2_nature	BOLA2	Q9H3K6	3|5|5	5|5|7|6|5|4|4|5|5|3|4|4|4|4|4|4|4	4.33	0.96	0.317793	0	0.66	0.158896	FALSE
nsp2_nature	CXorf56	Q9H5V9	1|0|0	0|0|1|0|0|1|0|1|1|2|1|3|2|0|0|1|0	0.33	0.44	0.0188011	0	0.71	0.00940057	FALSE
nsp2_nature	NSUN3	Q9H649	0|3|0	0|0|1|0|0|0|0|0|0|0|0|0|0|0|0|0|0	1	10	0.214213	0.33	0.19	0.272106	FALSE
nsp2_nature	DCTPP1	Q9H773	1|1|0	0|0|0|0|1|0|0|0|1|0|0|0|0|0|0|0|0	0.67	5.67	0.203292	0	0.71	0.101646	FALSE
nsp2_nature	AAMDC	Q9H7C9	2|0|0	3|2|2|1|2|3|3|1|3|3|2|3|3|3|3|4|4	0.67	0.25	0.00883928	0	0.71	0.00441964	FALSE
nsp2_nature	ZNF703	Q9H7S9	0|1|0	0|0|0|0|0|0|0|0|1|0|0|0|0|0|1|1|1	0.33	1.42	0.0210892	0	0.71	0.0105446	FALSE
nsp2_nature	NT5DC2	Q9H857	6|4|6	6|0|7|2|4|1|0|2|0|2|3|0|2|2|2|2|3	5.33	2.39	0.365541	0.22	0.36	0.29277	FALSE
nsp2_nature	NOL11	Q9H8H0	1|0|0	0|0|0|0|0|0|0|0|0|0|0|0|0|0|0|0|0	0.33	3.33	0.210191	0	0.71	0.105096	FALSE
nsp2_nature	BRD9	Q9H8M2	0|0|1	0|0|1|1|1|0|0|0|0|0|0|1|1|0|1|1|0	0.33	0.81	0.0720645	0	0.71	0.0360323	FALSE
nsp2_nature	JPT2	Q9H910	3|2|0	4|1|2|2|2|0|0|0|2|2|1|3|3|3|4|3|2	1.67	0.83	0.230487	0.01	0.58	0.120244	FALSE
nsp2_nature	SLC25A22	Q9H936	0|1|0	0|0|0|0|0|0|0|0|0|0|0|0|0|0|1|0|1	0.33	2.83	0.00416617	0	0.71	0.00208308	FALSE
nsp2_nature	LRRC40	Q9H9A6	5|2|2	3|1|3|1|1|0|0|1|3|2|1|1|1|2|4|3|1	3	1.82	0.362169	0.18	0.38	0.271085	FALSE
nsp2_nature	FN3KRP	Q9HA64	2|2|3	5|4|5|4|5|3|3|3|4|2|3|3|3|4|3|3|3	2.33	0.66	0.32489	0	0.71	0.162445	FALSE
nsp2_nature	CACYBP	Q9HB71	2|4|14	4|8|4|13|5|4|4|4|5|4|5|17|12|6|17|8|2	6.67	0.93	0.243142	0	0.64	0.121571	FALSE
nsp2_nature	PARVG	Q9HBI0	2|2|1	0|0|1|1|1|1|1|1|1|0|1|1|0|1|2|1|1	1.67	2.02	0.345309	0.17	0.4	0.257655	FALSE
nsp2_nature	GLOD4	Q9HC38	3|3|2	2|4|2|1|1|2|2|2|4|3|3|3|3|3|4|4|4	2.67	0.96	0.337522	0	0.62	0.168761	FALSE
nsp2_nature	SENP2	Q9HC62	1|3|1	0|0|0|0|0|0|0|0|2|0|0|1|0|0|2|1|0	1.67	4.72	0.348787	0.29	0.31	0.319393	FALSE
nsp2_nature	MCCC2	Q9HCC0	14|12|4	32|21|9|4|3|14|11|4|24|18|17|18|22|24|9|10|9	10	0.68	0.295955	0	0.71	0.147977	FALSE
nsp2_nature	CWC22	Q9HCG8	1|1|1	3|3|3|3|0|2|2|0|3|0|2|3|2|2|1|3|2	1	0.5	0.321887	0	0.71	0.160943	FALSE
nsp2_nature	RAVER2	Q9HCJ3	1|1|0	1|1|0|0|0|0|0|0|1|0|0|0|0|1|0|0|0	0.67	2.83	0.260514	0	0.71	0.130257	FALSE
nsp2_nature	CHMP1A	Q9HD42	2|0|2	2|1|3|2|2|2|1|1|2|3|3|2|2|1|3|1|0	1.33	0.73	0.215225	0.01	0.58	0.112613	FALSE
nsp2_nature	ZCCHC17	Q9NP64	10|13|12	9|15|10|13|9|9|11|12|17|4|7|12|13|10|12|12|12	11.67	1.06	0.330408	0	0.7	0.165204	FALSE
nsp2_nature	ENY2	Q9NPA8	1|2|0	1|0|1|1|0|1|0|0|2|0|1|0|0|0|0|0|0	1	2.43	0.204166	0.19	0.38	0.197083	FALSE
nsp2_nature	LUC7L	Q9NQ29	3|5|6	5|4|5|4|6|5|4|5|4|5|3|5|5|6|7|8|6	4.67	0.91	0.317918	0	0.67	0.158959	FALSE
nsp2_nature	MRPL40	Q9NQ50	0|0|1	0|0|0|0|0|0|0|0|0|0|1|1|1|1|0|0|0	0.33	1.42	0.0556876	0	0.71	0.0278438	FALSE
nsp2_nature	PPAN	Q9NQ55	1|0|0	0|0|0|0|0|0|0|0|0|0|0|0|0|0|0|0|0	0.33	3.33	0.0171699	0	0.71	0.00858493	FALSE
nsp2_nature	WASH6P	Q9NQA3	0|1|0	0|0|0|0|0|0|0|0|0|0|0|0|0|0|0|0|0	0.33	3.33	0.68551	0	0.71	0.342755	FALSE
nsp2_nature	DDX21	Q9NR30	7|0|0	0|5|6|0|0|0|0|0|3|0|0|1|1|0|3|1|0	2.33	1.98	0.0141373	0.28	0.31	0.147069	FALSE
nsp2_nature	APOBEC3C	Q9NRW3	0|2|1	2|1|2|3|1|1|1|1|2|0|0|2|1|0|0|0|1	1	0.94	0.210205	0.04	0.5	0.125102	FALSE
nsp2_nature	PNO1	Q9NRX1	1|1|1	1|1|1|3|1|0|0|0|1|2|1|2|2|0|3|0|1	1	0.89	0.332629	0	0.71	0.166314	FALSE
nsp2_nature	HELLS	Q9NRZ9	0|0|2	0|0|0|1|0|0|0|0|0|0|0|6|2|0|6|0|0	0.67	0.76	0.0731556	0.12	0.43	0.0965778	FALSE
nsp2_nature	LANCL2	Q9NS86	2|3|0	1|2|3|3|3|3|2|3|2|0|2|2|3|0|3|2|3	1.67	0.77	0.203688	0	0.6	0.101844	FALSE
nsp2_nature	FARSB	Q9NSD9	2|4|1	4|1|0|0|1|0|0|0|2|5|2|2|4|3|1|1|1	2.33	1.47	0.316579	0.1	0.45	0.208289	FALSE
nsp2_nature	FAM207A	Q9NSI2	0|1|0	0|0|0|0|0|0|0|0|0|0|0|0|0|1|1|2|0	0.33	1.42	0.0350388	0	0.71	0.0175194	FALSE
nsp2_nature	DIAPH3	Q9NSV4	2|2|3	5|3|4|1|3|3|2|1|3|3|4|8|8|6|2|6|3	2.33	0.61	0.322109	0	0.71	0.161055	FALSE
nsp2_nature	SMC4	Q9NTJ3	2|1|1	1|0|1|0|1|0|1|0|0|0|1|1|2|0|1|2|2	1.33	1.74	0.331464	0.1	0.45	0.215732	FALSE
nsp2_nature	DECR2	Q9NUI1	0|1|1	2|0|0|2|0|0|0|0|1|1|0|1|1|0|0|1|0	0.67	1.26	0.216949	0	0.71	0.108475	FALSE
nsp2_nature	ARL8B	Q9NVJ2	0|0|1	0|0|0|0|0|0|0|0|0|0|0|0|0|0|0|0|0	0.33	3.33	0.160556	0	0.71	0.0802782	FALSE
nsp2_nature	GNL3L	Q9NVN8	1|1|4	0|1|1|4|4|0|1|0|0|0|1|3|3|2|4|2|1	2	1.26	0.2828	0.09	0.46	0.1864	FALSE
nsp2_nature	DDX18	Q9NVP1	3|1|0	0|3|2|2|1|0|0|0|0|0|0|1|0|0|0|0|0	1.33	2.52	0.200843	0.24	0.34	0.220422	FALSE
nsp2_nature	DNAAF2	Q9NVR5	0|1|0	0|0|0|0|1|0|0|0|0|0|0|0|0|0|1|0|0	0.33	2.83	0.107943	0	0.71	0.0539713	FALSE
nsp2_nature	ARGLU1	Q9NWB6	8|7|7	7|3|3|4|3|5|5|3|6|2|5|8|8|3|7|6|7	7.33	1.47	0.343372	0	0.64	0.171686	FALSE
nsp2_nature	PAK1IP1	Q9NWT1	2|3|0	0|2|3|2|2|1|0|1|0|1|0|2|0|0|1|2|1	1.67	1.57	0.228871	0.16	0.4	0.194436	FALSE
nsp2_nature	CLN6	Q9NWW5	1|0|0	0|0|0|0|0|0|0|0|0|0|0|0|0|0|0|0|0	0.33	3.33	0.00799315	0	0.71	0.00399657	FALSE
nsp2_nature	NHP2	Q9NX24	1|0|0	0|1|2|2|1|3|0|1|0|1|0|1|0|0|0|1|0	0.33	0.44	0.0107674	0	0.71	0.00538368	FALSE
nsp2_nature	LYAR	Q9NX58	4|3|1	4|6|2|3|4|2|1|4|5|2|5|2|2|3|3|3|3	2.67	0.84	0.292194	0	0.64	0.146097	FALSE
nsp2_nature	CWC25	Q9NXE8	1|3|1	5|3|7|3|3|3|3|2|2|2|2|4|4|2|3|5|5	1.67	0.49	0.268653	0	0.71	0.134327	FALSE
nsp2_nature	GAR1	Q9NY12	0|1|0	0|0|0|1|0|0|0|0|0|0|0|0|0|0|0|0|0	0.33	3.33	0.0148044	0	0.71	0.00740219	FALSE
nsp2_nature	DDX56	Q9NY93	2|0|0	1|2|1|1|1|1|1|1|1|0|1|1|1|1|2|1|1	0.67	0.63	0.0115688	0.04	0.5	0.0257844	FALSE
nsp2_nature	BCLAF1	Q9NYF8	5|1|2	0|2|3|8|2|2|1|0|2|0|2|2|2|2|3|3|2	2.67	1.26	0.300475	0.06	0.49	0.180237	FALSE
nsp2_nature	MRPL39	Q9NYK5	1|1|0	0|0|0|1|1|0|0|0|0|0|0|0|0|0|0|0|0	0.67	5.67	0.28867	0	0.71	0.144335	FALSE
nsp2_nature	MIS18A	Q9NYP9	3|3|4	3|4|3|1|2|2|2|0|3|1|2|5|3|3|4|4|5	3.33	1.21	0.342568	0	0.61	0.171284	FALSE
nsp2_nature	TECR	Q9NZ01	0|1|0	0|0|0|0|0|0|0|0|0|0|0|0|0|0|0|0|0	0.33	3.33	0.0034472	0	0.71	0.0017236	FALSE
nsp2_nature	IGF2BP1	Q9NZI8	7|0|0	0|5|4|1|0|0|0|0|2|0|0|0|0|0|3|0|0	2.33	2.64	0.0275975	0.3	0.3	0.163799	FALSE
nsp2_nature	MPP6	Q9NZW5	3|1|1	1|0|3|0|0|0|0|1|1|2|2|0|2|0|0|0|0	1.67	2.36	0.350122	0.21	0.37	0.280061	FALSE
nsp2_nature	CNIH4	Q9P003	1|0|0	0|0|0|0|0|0|0|0|0|0|0|0|0|0|0|0|0	0.33	3.33	0.0135883	0	0.71	0.00679413	FALSE
nsp2_nature	THYN1	Q9P016	10|9|9	7|4|8|4|5|6|6|7|7|4|4|4|4|1|5|3|2	9.33	1.96	0.348253	0.01	0.56	0.179126	FALSE
nsp2_nature	CRIPT	Q9P021	5|2|6	2|0|4|3|1|0|3|2|2|1|1|3|3|1|4|3|3	4.33	2.05	0.327765	0.21	0.36	0.268882	FALSE
nsp2_nature	CCDC59	Q9P031	0|1|0	0|0|1|2|2|1|0|1|1|0|1|2|0|2|0|3|2	0.33	0.31	0.0147345	0	0.71	0.00736724	FALSE
nsp2_nature	MACROH2A2	Q9P0M6	3|0|0	0|2|2|0|0|0|0|0|0|0|0|0|0|0|0|0|0	1	4.25	0.162272	0.3	0.3	0.231136	FALSE
nsp2_nature	MTRES1	Q9P0P8	0|0|1	0|0|0|0|0|0|0|0|0|1|0|0|0|0|0|0|0	0.33	3.33	0.110012	0	0.71	0.0550061	FALSE
nsp2_nature	SENP1	Q9P0U3	1|0|0	0|0|0|0|0|0|0|0|0|0|0|1|1|0|0|0|0	0.33	2.83	0.0186504	0	0.71	0.0093252	FALSE
nsp2_nature	ABRACL	Q9P1F3	0|1|0	0|0|0|0|0|0|0|0|0|0|0|0|1|0|1|0|1	0.33	1.89	0.0525393	0	0.71	0.0262697	FALSE
nsp2_nature	RCC2	Q9P258	14|9|25	20|20|19|29|20|15|14|19|17|9|14|25|21|18|24|19|17	16	0.85	0.305482	0	0.71	0.152741	FALSE
nsp2_nature	FRMD4A	Q9P2Q2	0|1|0	0|0|1|0|0|0|0|0|0|0|1|0|0|0|0|0|0	0.33	2.83	0.0182469	0	0.71	0.00912344	FALSE
nsp2_nature	MORF4L1	Q9UBU8	0|0|1	0|0|0|0|0|0|0|0|0|0|2|4|2|0|2|2|0	0.33	0.47	0.0230022	0	0.71	0.0115011	FALSE
nsp2_nature	PEF1	Q9UBV8	4|3|2	1|0|2|2|1|1|1|3|0|1|1|5|4|5|4|4|4	3	1.31	0.344133	0.01	0.56	0.177066	FALSE
nsp2_nature	CGGBP1	Q9UFW8	5|2|3	6|6|4|2|4|5|1|1|3|3|0|3|3|4|3|3|3	3.33	1.05	0.316764	0	0.61	0.158382	FALSE
nsp2_nature	PISD	Q9UG56	0|2|0	1|0|0|0|0|0|0|0|0|0|0|0|0|0|0|0|0	0.67	6.67	0.0839479	0.32	0.22	0.201974	FALSE
nsp2_nature	ABCF2	Q9UG63	0|1|6	1|1|0|6|0|0|0|0|1|1|0|10|2|0|10|2|0	2.33	1.17	0.160284	0.16	0.4	0.160142	FALSE
nsp2_nature	PFDN2	Q9UHV9	2|2|1	2|1|2|1|2|1|0|1|3|2|1|1|1|1|1|1|1	1.67	1.29	0.326385	0.04	0.51	0.183193	FALSE
nsp2_nature	PUF60	Q9UHX1	7|3|10	7|8|9|9|8|4|3|3|6|5|4|17|20|12|15|16|12	6.67	0.72	0.314928	0	0.7	0.157464	FALSE
nsp2_nature	MRM2	Q9UI43	6|8|3	5|2|11|5|3|2|1|4|6|8|3|1|3|4|4|4|6	5.67	1.34	0.324176	0	0.6	0.162088	FALSE
nsp2_nature	BAZ1B	Q9UIG0	2|0|0	0|0|0|0|0|0|0|0|0|0|0|0|0|0|0|0|0	0.67	6.67	0.179138	0.32	0.22	0.249569	FALSE
nsp2_nature	ATP5IF1	Q9UII2	3|3|8	1|4|4|4|5|5|1|3|4|3|4|3|4|0|3|6|3	4.67	1.39	0.298417	0.05	0.49	0.174208	FALSE
nsp2_nature	DDX41	Q9UJV9	7|4|6	3|5|2|3|3|4|3|3|5|2|3|11|8|6|8|7|8	5.67	1.15	0.345894	0	0.65	0.172947	FALSE
nsp2_nature	RALY	Q9UKM9	4|0|0	0|2|2|0|0|0|0|0|1|0|0|0|1|0|0|1|0	1.33	3.24	0.0517411	0.32	0.22	0.185871	FALSE
nsp2_nature	ACIN1	Q9UKV3	5|0|0	0|1|1|0|0|0|0|0|0|0|0|1|0|0|0|0|0	1.67	9.44	0.141743	0.33	0.18	0.235871	FALSE
nsp2_nature	MCTS1	Q9ULC4	0|1|5	1|1|0|2|0|0|0|0|0|0|1|5|3|1|6|2|0	2	1.55	0.179492	0.22	0.36	0.199746	FALSE
nsp2_nature	TPX2	Q9ULW0	1|1|0	1|0|0|0|0|0|0|0|0|0|0|1|1|1|0|0|0	0.67	2.83	0.282656	0	0.71	0.141328	FALSE
nsp2_nature	NOB1	Q9ULX3	0|0|1	0|0|0|1|0|0|0|0|0|0|0|1|0|0|0|0|0	0.33	2.83	0.0699233	0	0.71	0.0349617	FALSE
nsp2_nature	ANAPC10	Q9UM13	0|1|0	0|0|1|0|0|0|0|1|0|1|0|1|1|1|0|0|0	0.33	0.94	0.0206247	0	0.71	0.0103124	FALSE
nsp2_nature	NFU1	Q9UMS0	1|0|0	2|0|0|0|0|0|0|0|0|0|0|0|1|1|1|0|0	0.33	1.13	0.0720495	0	0.71	0.0360247	FALSE
nsp2_nature	PRPF19	Q9UMS4	4|1|0	1|2|1|3|1|0|0|0|4|0|2|2|1|3|1|2|1	1.67	1.18	0.183158	0.13	0.42	0.156579	FALSE
nsp2_nature	NOL7	Q9UMY1	1|0|0	0|1|1|0|1|0|0|0|0|0|0|1|0|0|0|1|0	0.33	1.13	0.0457412	0	0.71	0.0228706	FALSE
nsp2_nature	DIMT1	Q9UNQ2	0|0|1	0|0|1|2|1|0|1|0|0|0|1|0|0|1|1|0|0	0.33	0.71	0.0107043	0	0.71	0.00535216	FALSE
nsp2_nature	C19orf53	Q9UNZ5	2|3|2	0|2|2|3|2|1|2|3|2|1|2|0|0|0|1|1|0	2.33	1.8	0.326945	0.11	0.44	0.218473	FALSE
nsp2_nature	SHOC2	Q9UQ13	0|0|1	0|0|0|1|0|0|0|0|0|0|0|1|1|1|2|0|0	0.33	0.94	0.137386	0	0.71	0.0686932	FALSE
nsp2_nature	SRRM2	Q9UQ35	3|5|3	6|5|6|6|4|5|5|3|6|4|3|7|12|8|6|8|10	3.67	0.6	0.315519	0	0.71	0.157759	FALSE
nsp2_nature	PA2G4	Q9UQ80	0|1|14	1|0|0|10|0|0|0|0|0|1|0|21|12|2|20|3|0	5	1.21	0.114291	0.2	0.37	0.157145	FALSE
nsp2_nature	RTRAF	Q9Y224	3|1|1	1|1|1|0|0|0|0|0|2|1|1|4|2|2|3|1|1	1.67	1.42	0.311235	0.09	0.46	0.200618	FALSE
nsp2_nature	PIN4	Q9Y237	4|4|7	6|3|6|6|4|2|3|2|5|5|2|6|6|4|8|5|5	5	1.09	0.327569	0	0.65	0.163784	FALSE
nsp2_nature	RUVBL1	Q9Y265	2|0|0	0|0|2|0|0|0|0|0|0|0|0|1|1|0|1|0|1	0.67	1.89	0.0180678	0.22	0.35	0.119034	FALSE
nsp2_nature	VDAC3	Q9Y277	4|5|4	0|0|0|0|0|0|0|0|0|0|0|0|0|0|0|0|0	4.33	43.33	0.371763	1	0	0.685881	FALSE
nsp2_nature	FARSA	Q9Y285	1|0|1	1|0|1|3|1|1|0|0|1|1|0|1|1|0|2|3|3	0.67	0.6	0.20378	0	0.71	0.10189	FALSE
nsp2_nature	DRG1	Q9Y295	0|1|9	1|2|0|2|1|2|0|0|0|5|1|8|9|5|5|4|0	3.33	1.26	0.143653	0.2	0.37	0.171826	FALSE
nsp2_nature	DDX52	Q9Y2R4	3|3|3	2|3|1|1|4|2|1|1|2|2|4|1|0|2|1|0|0	3	1.89	0.340847	0.09	0.46	0.215424	FALSE
nsp2_nature	TMA7	Q9Y2S6	4|5|6	9|5|5|3|4|5|4|4|5|2|5|7|7|5|6|4|5	5	1	0.323855	0	0.67	0.161927	FALSE
nsp2_nature	CARHSP1	Q9Y2V2	1|2|2	1|3|4|1|5|1|2|1|2|2|2|2|2|3|4|4|3	1.67	0.67	0.316493	0	0.71	0.158247	FALSE
nsp2_nature	THRAP3	Q9Y2W1	3|1|1	0|1|3|6|1|1|0|0|2|0|0|3|4|1|2|3|3	1.67	0.94	0.305049	0.02	0.54	0.162525	FALSE
nsp2_nature	WBP11	Q9Y2W2	0|0|2	0|0|0|0|0|0|0|0|0|0|0|4|4|1|6|4|0	0.67	0.6	0.0552308	0.06	0.49	0.0576154	FALSE
nsp2_nature	NOP58	Q9Y2X3	7|2|2	3|4|3|7|3|2|1|2|3|2|1|7|7|8|8|5|3	3.67	0.9	0.28403	0	0.62	0.142015	FALSE
nsp2_nature	NOSIP	Q9Y314	7|6|8	6|3|6|10|3|4|3|4|6|4|4|8|11|7|8|8|6	7	1.18	0.344718	0	0.67	0.172359	FALSE
nsp2_nature	LUC7L2	Q9Y383	20|21|21	21|21|20|21|21|24|23|15|24|13|11|24|28|14|21|19|21	20.67	1.03	0.329346	0	0.71	0.164673	FALSE
nsp2_nature	RBMX2	Q9Y388	3|2|5	4|3|3|3|3|3|2|3|4|2|2|3|3|1|3|2|3	3.33	1.21	0.322482	0.01	0.57	0.166241	FALSE
nsp2_nature	UTP11	Q9Y3A2	1|0|0	0|0|0|0|0|0|0|0|0|0|0|0|0|0|0|0|0	0.33	3.33	0.0905985	0	0.71	0.0452993	FALSE
nsp2_nature	SBDS	Q9Y3A5	0|0|11	3|3|1|9|1|3|0|0|1|3|2|10|4|5|13|7|0	3.67	0.96	0.029961	0.1	0.44	0.0649805	FALSE
nsp2_nature	SF3B6	Q9Y3B4	1|1|1	1|1|1|0|1|1|0|1|1|1|1|1|1|1|1|1|1	1	1.13	0.33414	0	0.71	0.16707	FALSE
nsp2_nature	RRP15	Q9Y3B9	1|0|0	0|0|0|1|0|0|0|0|0|0|0|1|1|0|0|0|0	0.33	1.89	0.0236482	0	0.71	0.0118241	FALSE
nsp2_nature	NOP16	Q9Y3C1	2|0|1	0|0|0|0|2|0|0|0|2|1|0|1|0|1|1|1|0	1	1.89	0.21481	0.16	0.4	0.187405	FALSE
nsp2_nature	PPIL1	Q9Y3C6	1|1|1	0|1|1|2|1|1|1|1|1|1|1|3|2|2|2|2|1	1	0.74	0.332753	0	0.71	0.166376	FALSE
nsp2_nature	MSRB2	Q9Y3D2	2|0|1	2|0|3|0|1|0|0|1|1|2|2|1|3|1|2|2|2	1	0.74	0.224157	0.02	0.55	0.122078	FALSE
nsp2_nature	BOLA1	Q9Y3E2	1|1|0	4|2|2|1|2|1|0|1|1|2|1|2|3|1|0|0|1	0.67	0.47	0.21951	0	0.71	0.109755	FALSE
nsp2_nature	STRAP	Q9Y3F4	1|0|0	0|0|0|0|0|0|0|0|0|0|0|0|0|0|0|0|0	0.33	3.33	0.0717726	0	0.71	0.0358863	FALSE
nsp2_nature	RTCB	Q9Y3I0	3|1|1	1|0|3|3|2|0|0|0|3|1|1|3|1|0|3|2|0	1.67	1.23	0.301327	0.06	0.49	0.180663	FALSE
nsp2_nature	RPL36	Q9Y3U8	2|0|0	0|0|1|1|0|0|0|0|0|0|0|0|0|0|2|0|0	0.67	2.83	0.0276429	0.26	0.33	0.143821	FALSE
nsp2_nature	CHTOP	Q9Y3Y2	3|0|0	0|2|1|1|0|0|0|0|1|0|0|0|0|0|1|0|0	1	2.83	0.0558975	0.31	0.3	0.182949	FALSE
nsp2_nature	FAM32A	Q9Y421	5|4|4	3|4|3|3|3|3|2|3|5|4|5|4|3|3|3|4|4	4.33	1.25	0.338105	0	0.62	0.169053	FALSE
nsp2_nature	HBS1L	Q9Y450	0|0|2	0|0|0|1|0|0|0|0|0|0|0|2|1|0|5|1|0	0.67	1.13	0.149118	0.17	0.39	0.159559	FALSE
nsp2_nature	AMMECR1	Q9Y4X0	3|4|2	3|2|3|3|3|2|2|1|2|2|3|4|5|2|4|3|4	3	1.06	0.338792	0	0.61	0.169396	FALSE
nsp2_nature	SUPT16H	Q9Y5B9	15|0|0	0|11|4|13|0|0|0|0|1|0|0|0|0|0|1|0|0	5	2.83	0.0933044	0.31	0.3	0.201652	FALSE
nsp2_nature	UTP18	Q9Y5J1	1|0|0	0|1|0|0|0|0|0|0|0|0|0|0|0|0|0|0|0	0.33	3.33	0.0834263	0	0.71	0.0417131	FALSE
nsp2_nature	RBM8A	Q9Y5S9	1|0|2	0|0|1|2|1|1|0|0|1|0|0|2|1|0|2|0|0	1	1.55	0.219088	0.13	0.42	0.174544	FALSE
nsp2_nature	ZNF706	Q9Y5V0	2|2|1	2|2|1|2|2|2|2|2|1|1|2|0|2|2|2|1|1	1.67	1.05	0.321956	0.02	0.55	0.170978	FALSE
nsp2_nature	PUS1	Q9Y606	2|2|2	3|2|4|2|4|1|0|2|1|1|3|4|2|1|5|4|2	2	0.83	0.347752	0	0.71	0.173876	FALSE
nsp2_nature	MRPS18B	Q9Y676	0|1|0	0|1|0|0|0|0|0|0|0|0|0|0|0|0|1|0|0	0.33	2.83	0.0393938	0	0.71	0.0196969	FALSE
nsp2_nature	SELENOK	Q9Y6D0	0|1|0	0|0|0|0|0|0|0|0|0|0|0|0|0|0|0|0|0	0.33	3.33	0.0301389	0	0.71	0.0150695	FALSE
nsp2_nature	CSNK1G3	Q9Y6M4	0|1|0	0|0|1|0|0|0|0|0|0|0|0|0|0|0|0|0|0	0.33	3.33	0.178166	0	0.71	0.0890829	FALSE
nsp2_nature	DDX49	Q9Y6V7	1|0|3	0|1|1|0|3|2|1|0|0|1|1|2|3|4|3|1|0	1.33	0.99	0.170057	0.06	0.49	0.115029	FALSE
nsp2_nature	NA	SARS_CoV_2_nsp10	5|4|4	9|9|14|12|0|0|0|0|17|7|1|0|0|0|0|0|0	4.33	1.07	0.32055	0	0.64	0.160275	FALSE
nsp2_nature	NA	SARS_CoV_2_nsp14	12|9|4	0|0|0|0|0|0|0|0|0|2|0|0|0|0|0|0|0	8.33	70.83	0.302753	1	0	0.651376	FALSE
nsp2_nature	NA	SARS_CoV_2_nsp2	133|150|153	0|0|0|0|0|0|0|0|0|6|1|0|0|0|0|0|0	145.33	352.95	0.891414	1	0	0.945707	TRUE
nsp2_nature	NA	SARS_CoV_2_nsp5	5|3|8	0|0|0|3|1|2|1|0|1|34|4|0|0|0|0|0|0	5.33	1.97	0.297018	0.23	0.35	0.263509	FALSE
nsp2_nature	NA	SARS_CoV_2_nsp7	2|1|0	0|0|0|0|9|4|5|0|1|1|2|0|0|0|0|0|0	1	0.77	0.191355	0.04	0.51	0.115677	FALSE
nsp2_nature	NA	SARS_CoV_2_nsp8	11|7|7	1|0|0|1|0|0|0|0|32|6|5|0|0|0|0|0|0	8.33	3.15	0.327667	0.57	0.11	0.448834	FALSE
nsp2_nature	NA	SARS_CoV_2_nsp9	2|3|2	0|4|1|2|0|0|0|0|24|2|2|0|0|0|0|0|0	2.33	1.13	0.306479	0.02	0.54	0.163239	FALSE
SARS2_nsp2_D23Y_R27C	NBDY	A0A0U1RRE5	1|2|1	3|0|2|3|2|0|0|3|1|2|1|3|3|2|1|1|2	1.33	0.78	0.310592	0.01	0.59	0.160296	FALSE
SARS2_nsp2_D23Y_R27C	FAM168B	A1KXE4	1|1|1	1|0|0|0|0|1|0|0|1|2|1|0|1|1|1|1|1	1	1.55	0.343149	0	0.71	0.171575	FALSE
SARS2_nsp2_D23Y_R27C	PGP	A6NDG6	5|2|5	2|3|6|4|5|4|4|5|6|3|3|3|8|5|5|5|3	4	0.92	0.322209	0	0.66	0.161105	FALSE
SARS2_nsp2_D23Y_R27C	METTL15	A6NJ78	2|1|1	0|0|0|0|0|0|0|0|0|0|0|2|1|1|2|0|0	1.33	3.78	0.595594	0.22	0.36	0.407797	FALSE
SARS2_nsp2_D23Y_R27C	AIP	O00170	2|3|1	6|4|6|5|2|1|3|4|5|4|4|2|5|5|7|7|7	2	0.44	0.296954	0	0.71	0.148477	FALSE
SARS2_nsp2_D23Y_R27C	GTPBP1	O00178	1|0|0	1|1|1|1|1|0|0|0|0|0|0|2|1|1|4|0|0	0.33	0.44	0.0187471	0	0.71	0.00937357	FALSE
SARS2_nsp2_D23Y_R27C	C11orf58	O00193	1|1|0	0|0|0|0|0|0|0|0|0|1|0|1|0|0|1|0|0	0.67	3.78	0.314442	0	0.71	0.157221	FALSE
SARS2_nsp2_D23Y_R27C	ATOX1	O00244	4|6|7	4|3|4|8|3|4|4|5|3|1|0|8|5|7|5|7|5	5.67	1.27	0.331678	0	0.64	0.165839	FALSE
SARS2_nsp2_D23Y_R27C	PGRMC1	O00264	5|5|3	0|0|0|0|0|0|0|0|0|0|0|0|0|0|0|0|0	4.33	43.33	0.383689	1	0	0.691844	FALSE
SARS2_nsp2_D23Y_R27C	IPO5	O00410	2|0|1	0|0|0|0|0|0|0|0|0|0|0|0|0|0|0|0|0	1	10	0.200572	0.32	0.22	0.260286	FALSE
SARS2_nsp2_D23Y_R27C	IFRD1	O00458	1|1|1	0|0|0|1|0|0|0|0|0|0|0|0|1|0|0|0|0	1	8.5	0.411298	0	0.71	0.205649	FALSE
SARS2_nsp2_D23Y_R27C	HMGN4	O00479	1|2|1	1|2|1|2|2|2|3|1|0|2|3|2|1|1|2|0|1	1.33	0.87	0.301165	0.01	0.57	0.155583	FALSE
SARS2_nsp2_D23Y_R27C	NDUFA4	O00483	0|0|1	0|0|1|0|0|0|0|1|1|0|1|1|1|1|1|1|0	0.33	0.63	0.00778751	0	0.71	0.00389376	FALSE
SARS2_nsp2_D23Y_R27C	ZNF593	O00488	1|1|2	0|0|0|1|2|0|0|1|0|0|0|2|2|2|1|1|1	1.33	1.74	0.374755	0.1	0.45	0.237378	FALSE
SARS2_nsp2_D23Y_R27C	PES1	O00541	3|1|3	1|2|1|6|5|4|0|0|2|1|2|6|6|4|7|5|2	2.33	0.73	0.315109	0	0.71	0.157554	FALSE
SARS2_nsp2_D23Y_R27C	NOP56	O00567	0|0|1	0|3|1|1|0|0|0|1|2|0|0|2|3|1|3|0|0	0.33	0.33	0.00397934	0	0.71	0.00198967	FALSE
SARS2_nsp2_D23Y_R27C	DDX3X	O00571	3|4|4	5|4|1|1|3|2|2|5|4|3|3|7|7|4|5|4|6	3.67	0.94	0.326962	0	0.66	0.163481	FALSE
SARS2_nsp2_D23Y_R27C	GAPDHS	O14556	1|1|1	0|1|1|2|1|1|1|0|0|1|1|1|2|1|1|1|1	1	1.06	0.338705	0	0.71	0.169352	FALSE
SARS2_nsp2_D23Y_R27C	IRS4	O14654	1|1|1	0|0|0|1|0|0|0|0|0|0|0|1|1|0|1|1|2	1	2.43	0.318391	0	0.71	0.159195	FALSE
SARS2_nsp2_D23Y_R27C	PRMT5	O14744	0|0|1	0|0|0|0|0|0|0|0|0|0|0|1|1|1|0|2|0	0.33	1.13	0.263624	0	0.71	0.131812	FALSE
SARS2_nsp2_D23Y_R27C	CHEK1	O14757	0|1|1	2|2|2|4|3|1|1|4|5|2|2|1|1|1|1|1|2	0.67	0.32	0.20643	0	0.71	0.103215	FALSE
SARS2_nsp2_D23Y_R27C	TCERG1	O14776	3|4|0	0|0|0|0|0|0|0|0|0|0|0|5|4|0|8|3|0	2.33	1.98	0.355448	0.33	0.18	0.342724	FALSE
SARS2_nsp2_D23Y_R27C	UQCRQ	O14949	0|1|1	0|0|0|0|0|0|0|0|0|0|0|0|0|0|0|0|0	0.67	6.67	0.38949	0	0.71	0.194745	FALSE
SARS2_nsp2_D23Y_R27C	SLC27A2	O14975	5|3|2	0|0|0|0|0|0|0|0|0|0|0|0|0|0|0|0|0	3.33	33.33	0.916035	0.98	0	0.948017	TRUE
SARS2_nsp2_D23Y_R27C	XPO1	O14980	1|0|1	0|0|0|0|0|0|0|0|0|0|0|0|0|0|0|0|0	0.67	6.67	0.2024	0	0.71	0.1012	FALSE
SARS2_nsp2_D23Y_R27C	U2SURP	O15042	23|12|17	25|31|14|16|16|24|23|14|25|17|21|39|34|38|26|27|26	17.33	0.71	0.324885	0	0.71	0.162443	FALSE
SARS2_nsp2_D23Y_R27C	ARPC3	O15145	1|0|0	2|1|0|1|0|1|0|1|1|0|1|0|0|0|0|1|0	0.33	0.63	0.0108208	0	0.71	0.0054104	FALSE
SARS2_nsp2_D23Y_R27C	POLR1C	O15160	1|0|0	0|0|0|0|0|0|0|0|0|0|0|1|0|0|0|0|0	0.33	3.33	0.0455176	0	0.71	0.0227588	FALSE
SARS2_nsp2_D23Y_R27C	MRPS12	O15235	4|3|3	6|2|6|6|4|3|1|6|3|1|2|4|3|2|4|3|2	3.33	0.98	0.328815	0	0.65	0.164407	FALSE
SARS2_nsp2_D23Y_R27C	HMGB3	O15347	14|12|7	2|6|3|14|9|4|1|0|3|8|5|15|10|11|17|12|2	11	1.53	0.353198	0	0.64	0.176599	FALSE
SARS2_nsp2_D23Y_R27C	EIF3D	O15371	2|2|0	0|0|0|1|0|0|0|0|1|0|0|4|2|2|6|5|5	1.33	0.87	0.278256	0.03	0.53	0.154128	FALSE
SARS2_nsp2_D23Y_R27C	EIF3H	O15372	1|1|1	0|0|0|1|0|0|0|0|0|0|0|1|1|0|1|1|1	1	2.83	0.365532	0	0.71	0.182766	FALSE
SARS2_nsp2_D23Y_R27C	CYB5B	O43169	0|0|1	0|0|0|0|0|0|0|0|0|0|0|0|0|0|0|0|0	0.33	3.33	0.0571309	0	0.71	0.0285654	FALSE
SARS2_nsp2_D23Y_R27C	PHGDH	O43175	6|8|7	1|2|5|2|0|1|1|1|2|1|0|4|2|4|6|6|6	7	2.7	0.329131	0.34	0.17	0.334565	FALSE
SARS2_nsp2_D23Y_R27C	PSMD3	O43242	0|0|1	0|0|0|1|0|0|0|0|0|0|0|0|1|0|2|1|5	0.33	0.57	0.00675521	0	0.71	0.00337761	FALSE
SARS2_nsp2_D23Y_R27C	SART1	O43290	1|0|1	0|0|0|1|1|0|0|1|1|0|0|3|2|1|1|1|0	0.67	0.94	0.227409	0	0.71	0.113705	FALSE
SARS2_nsp2_D23Y_R27C	HNRNPR	O43390	0|0|2	0|7|5|3|0|0|0|0|2|0|0|1|0|0|2|0|1	0.67	0.54	0.0144296	0.04	0.51	0.0272148	FALSE
SARS2_nsp2_D23Y_R27C	TXNL1	O43396	1|1|1	3|1|3|3|0|0|0|1|3|2|1|1|3|1|2|2|1	1	0.63	0.329838	0	0.71	0.164919	FALSE
SARS2_nsp2_D23Y_R27C	OIP5	O43482	3|3|4	3|1|1|1|1|2|2|0|2|1|1|5|3|5|2|2|2	3.33	1.67	0.376291	0.04	0.51	0.208145	FALSE
SARS2_nsp2_D23Y_R27C	DENR	O43583	2|4|2	1|0|0|4|1|2|0|0|1|0|0|7|3|2|4|5|1	2.67	1.46	0.344531	0.06	0.48	0.202266	FALSE
SARS2_nsp2_D23Y_R27C	RGS10	O43665	4|5|5	1|0|0|0|0|0|1|0|0|0|1|3|4|3|3|5|2	4.67	3.45	0.558441	0.56	0.11	0.55922	FALSE
SARS2_nsp2_D23Y_R27C	ZNF207	O43670	2|0|0	0|1|1|2|3|1|0|0|0|0|0|2|3|0|2|3|0	0.67	0.63	0.0163361	0.05	0.5	0.033168	FALSE
SARS2_nsp2_D23Y_R27C	BUB3	O43684	8|6|5	5|4|3|6|5|2|2|2|5|5|3|10|9|4|7|7|5	6.33	1.28	0.34535	0	0.64	0.172675	FALSE
SARS2_nsp2_D23Y_R27C	TRAF3IP2	O43734	1|0|1	0|0|0|0|0|0|0|0|3|0|0|2|0|2|0|0|2	0.67	1.26	0.272944	0	0.71	0.136472	FALSE
SARS2_nsp2_D23Y_R27C	NARS1	O43776	1|1|0	0|0|0|0|0|0|0|0|0|0|0|2|0|0|2|0|0	0.67	2.83	0.623054	0	0.71	0.311527	FALSE
SARS2_nsp2_D23Y_R27C	NUDT21	O43809	5|7|4	1|2|2|4|2|2|1|1|0|2|2|6|6|6|5|5|2	5.33	1.85	0.367717	0.07	0.48	0.218859	FALSE
SARS2_nsp2_D23Y_R27C	GTPBP6	O43824	1|0|1	0|0|0|0|0|0|0|0|0|0|0|0|0|0|1|0|0	0.67	6.67	0.778037	0	0.71	0.389018	FALSE
SARS2_nsp2_D23Y_R27C	IDH3B	O43837	1|0|0	2|3|4|3|2|1|1|1|2|4|3|1|1|1|2|1|1	0.33	0.17	0.00482605	0	0.71	0.00241303	FALSE
SARS2_nsp2_D23Y_R27C	NDUFS5	O43920	1|1|0	0|0|0|0|0|0|0|0|0|1|0|0|1|0|0|0|0	0.67	5.67	0.348152	0	0.71	0.174076	FALSE
SARS2_nsp2_D23Y_R27C	DHX16	O60231	2|0|0	0|0|0|0|0|0|0|0|0|0|0|1|0|0|4|0|0	0.67	2.27	0.363014	0.26	0.33	0.311507	FALSE
SARS2_nsp2_D23Y_R27C	EIF4E2	O60573	13|7|6	0|0|0|0|0|0|0|0|0|0|0|0|0|0|0|0|0	8.67	86.67	0.781604	1	0	0.890802	TRUE
SARS2_nsp2_D23Y_R27C	CTNND1	O60716	4|1|1	0|3|3|0|1|0|0|1|1|3|1|10|6|2|6|3|2	2	0.81	0.288184	0.01	0.57	0.149092	FALSE
SARS2_nsp2_D23Y_R27C	EIF1B	O60739	0|1|0	0|0|0|0|0|0|0|0|0|0|0|1|1|0|2|0|0	0.33	1.42	0.243461	0	0.71	0.121731	FALSE
SARS2_nsp2_D23Y_R27C	PQBP1	O60828	3|2|0	0|0|0|2|0|0|0|0|0|0|0|4|3|3|4|1|0	1.67	1.67	0.369594	0.22	0.36	0.294797	FALSE
SARS2_nsp2_D23Y_R27C	EIF5B	O60841	7|6|6	8|9|10|13|14|6|2|3|6|5|5|17|14|11|17|22|14	6.33	0.61	0.334946	0	0.71	0.167473	FALSE
SARS2_nsp2_D23Y_R27C	EDF1	O60869	4|2|1	3|4|2|5|2|2|1|1|2|2|3|5|4|1|7|4|2	2.33	0.79	0.299591	0	0.62	0.149796	FALSE
SARS2_nsp2_D23Y_R27C	PDCD6	O75340	5|5|5	3|4|8|7|4|4|4|3|5|4|3|4|7|4|4|5|5	5	1.09	0.344887	0	0.66	0.172444	FALSE
SARS2_nsp2_D23Y_R27C	NDUFS6	O75380	1|0|2	1|0|1|0|0|0|0|1|2|0|0|1|3|0|1|0|0	1	1.7	0.247079	0.14	0.41	0.193539	FALSE
SARS2_nsp2_D23Y_R27C	PRPF40A	O75400	5|7|7	3|3|3|5|3|5|2|2|4|3|5|9|8|5|6|6|6	6.33	1.38	0.352517	0	0.63	0.176258	FALSE
SARS2_nsp2_D23Y_R27C	PSIP1	O75475	0|0|1	1|1|2|4|1|0|0|2|0|1|1|3|2|0|4|2|1	0.33	0.23	0.0115385	0	0.71	0.00576924	FALSE
SARS2_nsp2_D23Y_R27C	ECI2	O75521	1|0|0	0|0|0|0|0|0|0|0|0|0|0|0|1|0|0|1|1	0.33	1.89	0.298959	0	0.71	0.149479	FALSE
SARS2_nsp2_D23Y_R27C	BANF1	O75531	1|0|2	2|2|3|4|0|0|0|0|0|0|0|0|0|0|3|0|1	1	1.13	0.209707	0.09	0.46	0.149854	FALSE
SARS2_nsp2_D23Y_R27C	SNRNP200	O75643	0|0|1	0|0|0|0|0|0|0|0|0|0|0|1|2|0|2|3|2	0.33	0.57	0.0246133	0	0.71	0.0123066	FALSE
SARS2_nsp2_D23Y_R27C	NUP155	O75694	4|2|3	5|1|2|1|2|2|1|1|4|5|2|4|6|5|2|2|5	3	1.02	0.329286	0	0.62	0.164643	FALSE
SARS2_nsp2_D23Y_R27C	DNAJC8	O75937	10|8|6	3|2|1|9|5|3|1|1|2|4|3|10|11|8|11|6|2	8	1.66	0.352537	0.01	0.59	0.181269	FALSE
SARS2_nsp2_D23Y_R27C	SMNDC1	O75940	7|6|6	3|4|3|4|5|5|1|2|3|2|3|6|7|6|7|5|4	6.33	1.54	0.350766	0	0.61	0.175383	FALSE
SARS2_nsp2_D23Y_R27C	ATP5PD	O75947	1|1|3	0|0|0|0|0|0|0|0|0|0|0|0|0|0|0|0|0	1.67	16.67	0.313982	0.33	0.19	0.321991	FALSE
SARS2_nsp2_D23Y_R27C	ATP5MG	O75964	2|0|1	0|0|0|0|0|0|0|0|0|0|0|0|0|0|0|0|0	1	10	0.2511	0.32	0.22	0.28555	FALSE
SARS2_nsp2_D23Y_R27C	RSL1D1	O76021	0|0|1	0|0|0|0|0|0|0|0|0|0|0|0|0|0|0|0|0	0.33	3.33	0.0061693	0	0.71	0.00308465	FALSE
SARS2_nsp2_D23Y_R27C	CLPX	O76031	3|0|1	0|1|0|1|1|0|0|0|0|1|0|2|1|1|2|1|0	1.33	2.06	0.235447	0.22	0.36	0.227723	FALSE
SARS2_nsp2_D23Y_R27C	PLPBP	O94903	3|4|5	7|6|4|4|3|3|4|4|4|5|6|3|3|3|3|3|3	4	1	0.327506	0	0.65	0.163753	FALSE
SARS2_nsp2_D23Y_R27C	SCAF4	O95104	2|0|0	0|0|0|0|0|0|0|0|0|0|0|0|0|0|0|0|0	0.67	6.67	0.68551	0.32	0.22	0.502755	FALSE
SARS2_nsp2_D23Y_R27C	ZRANB2	O95218	3|3|2	0|0|2|0|0|0|0|0|0|0|0|4|4|1|1|2|0	2.67	3.24	0.500534	0.47	0.13	0.485267	FALSE
SARS2_nsp2_D23Y_R27C	LUC7L3	O95232	21|17|15	18|19|18|21|25|18|17|18|21|8|14|21|20|18|22|20|21	17.67	0.94	0.329965	0	0.71	0.164982	FALSE
SARS2_nsp2_D23Y_R27C	VAPB	O95292	0|0|1	0|0|0|0|0|0|0|0|0|0|0|0|0|0|0|0|0	0.33	3.33	0.105516	0	0.71	0.0527582	FALSE
SARS2_nsp2_D23Y_R27C	SMC2	O95347	0|0|1	0|0|0|0|0|0|0|0|0|0|0|0|0|0|0|1|0	0.33	3.33	0.10577	0	0.71	0.0528848	FALSE
SARS2_nsp2_D23Y_R27C	LYPLA2	O95372	1|0|2	2|2|3|2|0|0|0|0|0|0|0|0|0|1|1|2|1	1	1.21	0.197516	0.08	0.46	0.138758	FALSE
SARS2_nsp2_D23Y_R27C	ACSL3	O95573	1|0|1	0|0|0|0|0|0|0|0|0|0|0|0|0|0|0|0|0	0.67	6.67	0.266757	0	0.71	0.133379	FALSE
SARS2_nsp2_D23Y_R27C	HSPA4L	O95757	4|3|0	0|0|0|0|0|0|0|1|0|0|0|0|0|0|0|0|0	2.33	23.33	0.236708	0.66	0.04	0.448354	FALSE
SARS2_nsp2_D23Y_R27C	TTC4	O95801	2|0|0	0|0|0|0|0|0|0|0|0|0|0|2|0|0|0|0|0	0.67	5.67	0.133848	0.31	0.3	0.221924	FALSE
SARS2_nsp2_D23Y_R27C	BPNT1	O95861	0|1|1	0|0|0|0|0|0|0|0|0|0|0|0|0|0|0|0|0	0.67	6.67	0.880172	0	0.71	0.440086	FALSE
SARS2_nsp2_D23Y_R27C	TXNDC12	O95881	3|4|3	5|5|7|5|5|4|2|6|4|4|3|3|6|3|4|5|6	3.33	0.74	0.326266	0	0.71	0.163133	FALSE
SARS2_nsp2_D23Y_R27C	COX2	P00403	2|3|2	0|0|0|0|0|0|0|0|0|0|0|0|0|0|0|1|0	2.33	23.33	0.379194	0.97	0.01	0.674597	FALSE
SARS2_nsp2_D23Y_R27C	SOD1	P00441	1|0|0	3|1|1|0|0|0|0|0|1|1|0|2|2|1|1|0|1	0.33	0.4	0.0173235	0	0.71	0.00866174	FALSE
SARS2_nsp2_D23Y_R27C	HPRT1	P00492	6|2|4	2|3|3|2|1|2|1|2|4|2|2|4|6|2|1|4|3	4	1.55	0.328451	0.06	0.49	0.194225	FALSE
SARS2_nsp2_D23Y_R27C	PGK1	P00558	1|0|0	1|2|1|2|3|0|0|0|1|1|2|3|1|1|1|0|1	0.33	0.28	0.00659159	0	0.71	0.0032958	FALSE
SARS2_nsp2_D23Y_R27C	ATP6	P00846	1|0|1	0|0|0|0|0|0|0|0|0|0|0|0|0|0|0|1|0	0.67	6.67	0.27378	0	0.71	0.13689	FALSE
SARS2_nsp2_D23Y_R27C	LMNA	P02545	9|12|14	0|0|1|1|0|0|0|0|1|0|0|2|1|1|1|1|1	11.67	19.83	0.808166	1	0	0.904083	TRUE
SARS2_nsp2_D23Y_R27C	ALDOA	P04075	0|2|1	1|1|1|1|2|0|0|1|2|0|1|5|4|3|3|2|2	1	0.59	0.215984	0	0.59	0.107992	FALSE
SARS2_nsp2_D23Y_R27C	CSTB	P04080	3|2|2	5|7|6|4|5|5|5|6|8|3|5|5|3|5|5|5|6	2.33	0.45	0.316231	0	0.71	0.158115	FALSE
SARS2_nsp2_D23Y_R27C	KRT1	P04264	1|1|1	0|0|0|0|1|0|0|0|0|0|0|0|0|1|1|2|1	1	2.83	0.416081	0	0.71	0.208041	FALSE
SARS2_nsp2_D23Y_R27C	GAPDH	P04406	5|5|9	7|6|3|4|2|3|3|4|7|2|4|7|4|7|4|8|8	6.33	1.3	0.330499	0	0.62	0.16525	FALSE
SARS2_nsp2_D23Y_R27C	HSPB1	P04792	0|1|0	0|0|0|1|1|0|0|1|0|0|0|0|0|0|2|1|1	0.33	0.81	0.0147185	0	0.71	0.00735925	FALSE
SARS2_nsp2_D23Y_R27C	RPN1	P04843	5|4|5	0|0|0|0|0|0|0|0|0|0|0|0|0|0|1|0|0	4.67	46.67	0.327033	1	0	0.663516	FALSE
SARS2_nsp2_D23Y_R27C	RPN2	P04844	2|0|1	0|0|0|0|0|0|0|0|0|0|0|0|0|0|0|0|0	1	10	0.194003	0.32	0.22	0.257002	FALSE
SARS2_nsp2_D23Y_R27C	ATP1A1	P05023	3|1|4	0|0|0|0|0|0|0|0|1|0|0|2|1|0|1|1|2	2.67	5.67	0.28213	0.6	0.11	0.441065	FALSE
SARS2_nsp2_D23Y_R27C	HMGN1	P05114	6|1|1	1|4|4|6|6|0|1|2|3|2|4|6|7|1|7|4|1	2.67	0.77	0.237539	0	0.61	0.11877	FALSE
SARS2_nsp2_D23Y_R27C	SLC25A5	P05141	8|8|6	3|4|4|5|3|2|4|3|5|0|0|8|7|7|7|8|6	7.33	1.64	0.327895	0	0.61	0.163948	FALSE
SARS2_nsp2_D23Y_R27C	PCCA	P05165	8|5|4	24|29|17|10|11|21|24|7|29|21|21|36|40|41|12|12|14	5.67	0.26	0.311078	0	0.71	0.155539	FALSE
SARS2_nsp2_D23Y_R27C	PCCB	P05166	2|0|3	18|20|6|5|6|19|18|4|27|16|13|27|26|31|11|13|14	1.67	0.1	0.187844	0	0.71	0.0939219	FALSE
SARS2_nsp2_D23Y_R27C	EIF2S1	P05198	3|2|2	0|0|0|3|0|0|0|0|0|0|0|6|2|2|7|6|1	2.33	1.47	0.394953	0.08	0.47	0.237477	FALSE
SARS2_nsp2_D23Y_R27C	HMGN2	P05204	13|9|8	4|3|7|8|6|5|6|7|9|9|5|12|10|5|10|3|10	10	1.43	0.33736	0	0.64	0.16868	FALSE
SARS2_nsp2_D23Y_R27C	RPLP1	P05386	0|0|1	1|2|1|1|0|0|0|0|4|0|0|0|0|0|1|0|0	0.33	0.57	0.00775472	0	0.71	0.00387736	FALSE
SARS2_nsp2_D23Y_R27C	RPLP2	P05387	0|0|2	2|8|5|6|0|1|0|0|6|1|2|0|0|0|2|0|0	0.67	0.34	0.00559155	0	0.6	0.00279578	FALSE
SARS2_nsp2_D23Y_R27C	CDK1	P06493	3|2|1	0|0|0|0|0|0|0|0|2|1|2|6|3|1|3|1|0	2	1.79	0.331761	0.17	0.39	0.250881	FALSE
SARS2_nsp2_D23Y_R27C	ATP5F1B	P06576	19|17|15	4|4|8|5|4|2|2|2|2|2|3|9|7|7|9|7|12	17	3.25	0.361054	0.74	0.02	0.550527	FALSE
SARS2_nsp2_D23Y_R27C	ENO1	P06733	7|8|9	12|7|7|8|7|4|6|4|6|4|5|12|9|8|5|6|5	8	1.18	0.337434	0	0.68	0.168717	FALSE
SARS2_nsp2_D23Y_R27C	NPM1	P06748	3|3|5	4|15|14|15|2|0|0|1|10|3|2|6|5|2|9|3|2	3.67	0.67	0.317273	0	0.71	0.158636	FALSE
SARS2_nsp2_D23Y_R27C	LDHB	P07195	1|0|0	1|1|1|1|1|0|0|0|2|0|0|4|1|1|0|1|1	0.33	0.38	0.00564008	0	0.71	0.00282004	FALSE
SARS2_nsp2_D23Y_R27C	H1-0	P07305	0|0|2	1|2|3|1|1|0|0|0|1|0|0|0|0|0|1|0|0	0.67	1.13	0.0255032	0.14	0.41	0.0827516	FALSE
SARS2_nsp2_D23Y_R27C	ANXA2	P07355	1|2|1	2|2|2|2|0|2|1|1|2|2|1|6|3|2|4|2|1	1.33	0.65	0.319463	0	0.71	0.159732	FALSE
SARS2_nsp2_D23Y_R27C	TUBB	P07437	5|5|4	5|4|7|3|6|2|2|5|4|2|3|8|5|5|6|4|5	4.67	1.04	0.322199	0	0.66	0.1611	FALSE
SARS2_nsp2_D23Y_R27C	EPRS1	P07814	1|0|1	0|0|1|1|2|1|1|1|0|0|2|8|9|3|2|6|9	0.67	0.25	0.208831	0	0.71	0.104415	FALSE
SARS2_nsp2_D23Y_R27C	HSP90AA1	P07900	1|1|3	0|0|0|1|0|0|0|1|0|0|0|1|1|0|0|0|1	1.67	5.67	0.334058	0.31	0.3	0.322029	FALSE
SARS2_nsp2_D23Y_R27C	HNRNPC	P07910	0|0|2	0|7|7|3|0|0|1|0|6|0|0|1|0|0|2|0|0	0.67	0.42	0.0118916	0.01	0.56	0.0109458	FALSE
SARS2_nsp2_D23Y_R27C	UQCRH	P07919	1|1|0	0|0|0|0|1|0|0|0|0|0|0|0|0|1|1|2|1	0.67	1.89	0.258932	0	0.71	0.129466	FALSE
SARS2_nsp2_D23Y_R27C	SLC3A2	P08195	0|1|0	0|0|0|0|0|0|0|0|0|0|0|0|0|0|0|0|0	0.33	3.33	0.0040807	0	0.71	0.00204035	FALSE
SARS2_nsp2_D23Y_R27C	HSP90AB1	P08238	3|3|3	1|1|0|2|1|1|1|0|1|0|0|2|1|1|2|2|2	3	2.83	0.355753	0.36	0.16	0.357876	FALSE
SARS2_nsp2_D23Y_R27C	PDHA1	P08559	0|0|2	0|0|0|0|0|0|0|0|0|0|0|1|2|1|0|1|1	0.67	1.89	0.0506854	0.22	0.35	0.135343	FALSE
SARS2_nsp2_D23Y_R27C	CYC1	P08574	0|0|1	0|0|0|0|0|0|0|0|0|0|0|0|0|0|0|0|0	0.33	3.33	0.020615	0	0.71	0.0103075	FALSE
SARS2_nsp2_D23Y_R27C	SNRNP70	P08621	3|1|1	0|1|0|9|0|0|0|0|0|0|0|3|3|0|7|1|0	1.67	1.18	0.387493	0.09	0.46	0.238747	FALSE
SARS2_nsp2_D23Y_R27C	VIM	P08670	1|0|8	1|12|12|16|0|0|1|0|8|0|0|1|1|1|13|1|1	3	0.75	0.103207	0.01	0.57	0.0566034	FALSE
SARS2_nsp2_D23Y_R27C	RPS17	P08708	14|10|8	15|13|13|16|12|9|7|12|14|8|6|16|17|14|18|13|11	10.67	0.85	0.325516	0	0.71	0.162758	FALSE
SARS2_nsp2_D23Y_R27C	RPSA	P08865	5|3|4	7|3|6|10|3|4|4|7|6|6|4|3|8|4|6|9|6	4	0.71	0.323222	0	0.71	0.161611	FALSE
SARS2_nsp2_D23Y_R27C	SNRPA	P09012	2|1|0	0|0|1|3|0|0|0|0|0|0|0|1|1|1|3|1|0	1	1.55	0.311213	0.13	0.42	0.220607	FALSE
SARS2_nsp2_D23Y_R27C	SNRPC	P09234	0|1|0	0|0|2|1|0|0|0|0|0|0|0|1|2|0|2|1|1	0.33	0.57	0.0380945	0	0.71	0.0190473	FALSE
SARS2_nsp2_D23Y_R27C	HMGB1	P09429	17|15|11	12|10|7|18|12|5|7|4|11|7|7|9|12|12|13|13|10	14.33	1.44	0.338016	0	0.68	0.169008	FALSE
SARS2_nsp2_D23Y_R27C	HNRNPA1	P09651	1|0|3	3|7|7|7|0|1|0|1|6|0|0|1|1|0|5|0|1	1.33	0.57	0.16307	0	0.6	0.0815351	FALSE
SARS2_nsp2_D23Y_R27C	SNRPA1	P09661	1|1|0	0|2|1|2|1|1|1|1|1|1|2|3|2|3|3|2|1	0.67	0.42	0.219261	0	0.71	0.10963	FALSE
SARS2_nsp2_D23Y_R27C	COX6C	P09669	3|1|2	0|0|0|0|0|0|0|0|0|0|0|0|0|0|0|0|0	2	20	0.377385	0.65	0.06	0.513692	FALSE
SARS2_nsp2_D23Y_R27C	PARP1	P09874	57|44|41	31|42|33|61|47|31|14|30|32|34|29|61|56|49|61|55|51	47.33	1.12	0.336326	0	0.71	0.168163	FALSE
SARS2_nsp2_D23Y_R27C	PET100	P0DJ07	1|1|1	0|0|0|0|0|0|0|0|0|0|0|1|1|1|1|1|1	1	2.83	0.468851	0	0.71	0.234425	FALSE
SARS2_nsp2_D23Y_R27C	POLR1D	P0DPB5	1|1|0	1|0|0|1|1|1|1|1|1|0|0|3|3|0|1|3|1	0.67	0.63	0.221338	0	0.71	0.110669	FALSE
SARS2_nsp2_D23Y_R27C	H1-4	P10412	0|1|3	0|1|4|0|0|0|0|0|3|0|0|1|1|0|3|0|0	1.33	1.74	0.201475	0.19	0.37	0.195738	FALSE
SARS2_nsp2_D23Y_R27C	TXN	P10599	12|10|7	8|7|12|8|10|5|7|8|10|5|9|13|11|8|10|11|10	9.67	1.08	0.327802	0	0.69	0.163901	FALSE
SARS2_nsp2_D23Y_R27C	COX5B	P10606	4|3|3	0|0|0|0|0|0|0|0|0|0|0|0|0|0|0|0|0	3.33	33.33	0.514067	0.99	0	0.752034	FALSE
SARS2_nsp2_D23Y_R27C	MAPT	P10636	1|0|0	0|0|0|0|0|0|0|0|0|0|0|1|0|0|0|0|0	0.33	3.33	0.539271	0	0.71	0.269636	FALSE
SARS2_nsp2_D23Y_R27C	HSPD1	P10809	13|11|14	12|8|8|3|5|4|6|6|13|12|12|21|15|13|9|13|14	12.67	1.24	0.330538	0	0.69	0.165269	FALSE
SARS2_nsp2_D23Y_R27C	HSPA5	P11021	49|51|43	15|11|10|11|12|10|12|7|11|12|10|14|13|8|14|13|15	47.67	4.09	0.353141	1	0	0.676571	FALSE
SARS2_nsp2_D23Y_R27C	HSPA8	P11142	31|33|28	22|15|22|24|23|9|12|19|21|11|14|16|18|17|26|29|30	30.67	1.59	0.330567	0	0.7	0.165284	FALSE
SARS2_nsp2_D23Y_R27C	PDHB	P11177	0|0|1	0|0|0|1|0|0|0|0|0|0|0|0|1|1|2|4|6	0.33	0.38	0.00854638	0	0.71	0.00427319	FALSE
SARS2_nsp2_D23Y_R27C	TOP1	P11387	9|5|7	11|12|16|13|12|10|10|7|10|5|8|11|11|9|14|11|10	7	0.66	0.320045	0	0.71	0.160022	FALSE
SARS2_nsp2_D23Y_R27C	PC	P11498	69|63|65	88|80|55|48|44|63|67|42|86|64|68|74|82|75|53|47|53	65.67	1.03	0.334099	0	0.71	0.167049	FALSE
SARS2_nsp2_D23Y_R27C	MTHFD1	P11586	7|4|6	8|3|8|9|2|2|2|2|7|7|5|10|7|7|8|7|2	5.67	1	0.331146	0	0.67	0.165573	FALSE
SARS2_nsp2_D23Y_R27C	SLC25A6	P12236	2|1|2	2|2|2|2|2|1|1|2|1|1|2|2|1|1|3|2|2	1.67	0.98	0.309071	0.01	0.57	0.159536	FALSE
SARS2_nsp2_D23Y_R27C	TPR	P12270	1|0|0	1|1|0|0|2|1|1|1|1|1|1|1|0|0|1|0|1	0.33	0.44	0.00944666	0	0.71	0.00472333	FALSE
SARS2_nsp2_D23Y_R27C	CKB	P12277	1|2|2	0|0|1|1|0|0|0|0|0|1|0|1|0|0|0|0|0	1.67	7.08	0.537968	0.52	0.12	0.528984	FALSE
SARS2_nsp2_D23Y_R27C	XRCC6	P12956	1|0|3	0|7|2|5|0|1|0|0|1|0|0|0|0|0|2|0|0	1.33	1.26	0.197678	0.15	0.41	0.173839	FALSE
SARS2_nsp2_D23Y_R27C	COX4I1	P13073	2|3|3	0|0|0|0|0|0|0|0|0|0|0|0|0|0|0|0|0	2.67	26.67	0.408567	0.98	0	0.694283	FALSE
SARS2_nsp2_D23Y_R27C	EEF2	P13639	9|6|12	13|14|8|10|8|3|7|9|8|3|6|13|14|13|10|18|10	9	0.92	0.320976	0	0.7	0.160488	FALSE
SARS2_nsp2_D23Y_R27C	PDIA4	P13667	1|1|0	2|0|0|0|0|0|0|0|0|0|1|0|1|0|1|1|0	0.67	1.89	0.203611	0	0.71	0.101805	FALSE
SARS2_nsp2_D23Y_R27C	TPT1	P13693	1|0|0	0|0|0|0|0|0|0|0|0|0|0|0|0|0|1|0|0	0.33	3.33	0.498048	0	0.71	0.249024	FALSE
SARS2_nsp2_D23Y_R27C	PLS3	P13797	0|0|2	3|2|3|1|2|2|1|1|3|3|2|1|2|3|1|1|1	0.67	0.35	0.00931207	0	0.61	0.00465604	FALSE
SARS2_nsp2_D23Y_R27C	GTF2F2	P13984	1|1|1	0|0|0|0|0|0|0|0|0|0|0|2|0|1|2|1|0	1	2.83	0.338808	0	0.71	0.169404	FALSE
SARS2_nsp2_D23Y_R27C	MTHFD2	P13995	3|2|1	0|0|0|0|1|0|0|0|0|0|0|0|0|1|1|1|1	2	6.8	0.331344	0.55	0.12	0.440672	FALSE
SARS2_nsp2_D23Y_R27C	MIF	P14174	3|3|2	3|3|1|2|2|3|4|1|2|1|2|1|2|2|0|0|1	2.67	1.51	0.34142	0.04	0.51	0.19071	FALSE
SARS2_nsp2_D23Y_R27C	COX7A2	P14406	2|2|2	0|0|0|0|0|0|0|0|0|0|0|0|0|0|0|0|0	2	20	0.566833	0.95	0.01	0.758416	FALSE
SARS2_nsp2_D23Y_R27C	PKM	P14618	1|2|1	8|3|1|3|0|1|2|2|3|4|2|14|13|8|1|6|4	1.33	0.3	0.296124	0	0.71	0.148062	FALSE
SARS2_nsp2_D23Y_R27C	COX6B1	P14854	1|2|1	0|0|0|0|0|0|0|0|0|0|0|0|0|0|0|0|0	1.33	13.33	0.973289	0.32	0.22	0.646645	FALSE
SARS2_nsp2_D23Y_R27C	HNRNPL	P14866	2|0|7	5|13|11|7|1|0|1|1|10|1|1|4|3|3|12|2|2	3	0.66	0.161396	0	0.64	0.0806982	FALSE
SARS2_nsp2_D23Y_R27C	JUP	P14923	0|4|0	0|0|0|0|0|0|0|0|0|0|0|0|0|0|0|1|0	1.33	13.33	0.362428	0.33	0.18	0.346214	FALSE
SARS2_nsp2_D23Y_R27C	EZR	P15311	3|1|0	0|0|0|0|0|0|0|0|0|0|0|2|1|0|2|0|0	1.33	4.53	0.314504	0.3	0.3	0.307252	FALSE
SARS2_nsp2_D23Y_R27C	RPS2	P15880	5|3|6	7|7|6|10|8|4|5|4|8|3|4|6|6|6|6|4|5	4.67	0.8	0.311521	0	0.68	0.15576	FALSE
SARS2_nsp2_D23Y_R27C	DSP	P15924	0|17|7	0|0|0|0|0|0|0|0|0|0|0|0|1|1|4|16|3	8	5.44	0.273337	0.59	0.11	0.431669	FALSE
SARS2_nsp2_D23Y_R27C	COX7C	P15954	1|0|0	0|0|0|0|0|0|0|0|0|0|0|0|0|0|0|0|0	0.33	3.33	0.0502394	0	0.71	0.0251197	FALSE
SARS2_nsp2_D23Y_R27C	CBR1	P16152	7|7|8	7|8|6|6|8|3|5|5|8|5|6|11|9|9|9|8|9	7.33	1.02	0.340591	0	0.69	0.170295	FALSE
SARS2_nsp2_D23Y_R27C	H1-2	P16403	2|3|4	3|7|6|4|4|5|2|2|5|3|4|4|4|0|3|1|1	3	0.88	0.31436	0	0.65	0.15718	FALSE
SARS2_nsp2_D23Y_R27C	POR	P16435	5|3|6	0|0|0|0|0|0|0|0|0|0|0|0|0|0|0|0|0	4.67	46.67	0.768148	1	0	0.884074	TRUE
SARS2_nsp2_D23Y_R27C	ATP2A2	P16615	1|0|2	0|0|0|0|0|0|0|0|0|0|0|0|0|0|0|0|0	1	10	0.176846	0.32	0.22	0.248423	FALSE
SARS2_nsp2_D23Y_R27C	HMGA1	P17096	3|1|2	3|3|1|4|1|2|2|1|5|1|1|3|1|2|3|3|2	2	0.89	0.313063	0	0.61	0.156531	FALSE
SARS2_nsp2_D23Y_R27C	CTPS1	P17812	6|4|6	3|4|5|5|5|2|1|1|4|5|1|0|4|3|3|4|5	5.33	1.65	0.338019	0.01	0.56	0.174009	FALSE
SARS2_nsp2_D23Y_R27C	DDX5	P17844	10|7|7	10|10|14|9|12|11|8|10|10|6|7|11|7|9|12|7|5	8	0.86	0.325663	0	0.7	0.162832	FALSE
SARS2_nsp2_D23Y_R27C	PFKL	P17858	0|0|1	0|0|0|0|0|0|0|0|0|0|0|0|0|1|0|0|0	0.33	3.33	0.00473806	0	0.71	0.00236903	FALSE
SARS2_nsp2_D23Y_R27C	TCP1	P17987	12|15|16	0|0|1|2|2|0|0|0|1|2|1|5|7|3|7|9|11	14.33	4.78	0.400006	0.86	0.02	0.630003	FALSE
SARS2_nsp2_D23Y_R27C	RPL7	P18124	0|0|1	1|2|3|3|0|0|1|0|5|1|1|0|0|0|1|0|0	0.33	0.31	0.00463252	0	0.71	0.00231626	FALSE
SARS2_nsp2_D23Y_R27C	RPL17	P18621	2|4|4	6|6|5|6|5|4|2|5|7|7|8|8|5|4|7|5|9	3.33	0.57	0.304357	0	0.71	0.152179	FALSE
SARS2_nsp2_D23Y_R27C	RCC1	P18754	0|0|1	1|1|2|2|0|1|0|0|1|0|1|1|0|1|2|0|0	0.33	0.44	0.0160027	0	0.71	0.00800134	FALSE
SARS2_nsp2_D23Y_R27C	ATP5PF	P18859	2|2|2	0|0|0|0|0|0|0|0|0|0|0|0|0|0|0|1|1	2	17	0.395499	0.94	0.01	0.66775	FALSE
SARS2_nsp2_D23Y_R27C	NCL	P19338	0|0|7	1|14|9|13|0|0|0|0|8|0|0|4|0|0|12|0|0	2.33	0.65	0.0140407	0.01	0.56	0.0120203	FALSE
SARS2_nsp2_D23Y_R27C	EIF2S2	P20042	2|2|1	0|0|0|3|0|0|0|0|0|0|0|6|7|4|6|4|0	1.67	0.94	0.401015	0.02	0.56	0.210508	FALSE
SARS2_nsp2_D23Y_R27C	ANXA7	P20073	2|3|1	0|0|0|0|0|0|0|0|0|0|0|4|3|4|2|4|0	2	2	0.640613	0.23	0.35	0.435307	FALSE
SARS2_nsp2_D23Y_R27C	BTF3	P20290	4|3|4	0|1|1|4|3|0|0|0|0|1|0|6|5|4|9|4|5	3.67	1.45	0.370039	0.02	0.55	0.195019	FALSE
SARS2_nsp2_D23Y_R27C	PSMB1	P20618	1|1|1	0|0|0|0|0|0|0|0|0|0|0|1|0|1|0|0|0	1	8.5	0.881937	0	0.71	0.440968	FALSE
SARS2_nsp2_D23Y_R27C	COX5A	P20674	3|3|4	0|0|0|0|0|0|0|0|0|0|0|0|0|0|0|0|0	3.33	33.33	0.477928	0.99	0	0.733964	FALSE
SARS2_nsp2_D23Y_R27C	LMNB1	P20700	36|36|36	3|9|6|4|1|1|0|0|9|0|0|6|3|6|17|3|8	36	8.05	0.472493	1	0	0.736246	FALSE
SARS2_nsp2_D23Y_R27C	HOXA5	P20719	0|0|1	1|0|0|0|1|0|0|0|1|1|0|0|0|1|0|0|0	0.33	1.13	0.0255349	0	0.71	0.0127674	FALSE
SARS2_nsp2_D23Y_R27C	FLNA	P21333	0|1|1	0|0|0|0|0|0|0|0|0|0|0|2|1|0|1|1|1	0.67	1.89	0.54717	0	0.71	0.273585	FALSE
SARS2_nsp2_D23Y_R27C	MDK	P21741	2|2|1	4|0|4|3|3|2|2|1|4|0|0|3|3|0|3|2|2	1.67	0.79	0.318604	0	0.71	0.159302	FALSE
SARS2_nsp2_D23Y_R27C	VDAC1	P21796	3|3|8	0|0|0|0|0|0|0|0|0|0|0|1|0|0|0|0|0	4.67	46.67	0.303344	0.99	0	0.646672	FALSE
SARS2_nsp2_D23Y_R27C	PCMT1	P22061	17|17|14	16|14|18|20|22|14|13|17|20|7|16|20|20|20|23|23|24	16	0.89	0.33139	0	0.71	0.165695	FALSE
SARS2_nsp2_D23Y_R27C	FBL	P22087	1|0|1	1|3|4|5|1|1|0|1|2|1|0|2|1|2|5|2|0	0.67	0.37	0.19921	0	0.71	0.0996052	FALSE
SARS2_nsp2_D23Y_R27C	GART	P22102	8|3|8	4|2|7|4|1|3|2|3|4|0|0|6|5|4|4|7|8	6.33	1.68	0.330968	0.03	0.53	0.180484	FALSE
SARS2_nsp2_D23Y_R27C	PAICS	P22234	1|2|0	1|0|0|0|0|0|0|0|1|1|0|0|1|0|0|0|0	1	4.25	0.270677	0.26	0.33	0.265339	FALSE
SARS2_nsp2_D23Y_R27C	HNRNPA2B1	P22626	2|1|12	9|28|26|26|0|2|4|1|21|2|1|2|2|0|16|0|1	5	0.6	0.188113	0	0.68	0.0940564	FALSE
SARS2_nsp2_D23Y_R27C	UQCRC2	P22695	5|2|6	0|0|0|0|0|0|0|0|0|0|0|0|0|0|0|0|0	4.33	43.33	0.377826	0.98	0	0.678913	FALSE
SARS2_nsp2_D23Y_R27C	XPA	P23025	0|0|1	1|0|0|0|0|0|0|0|0|0|0|0|0|1|1|1|0	0.33	1.42	0.119486	0	0.71	0.0597428	FALSE
SARS2_nsp2_D23Y_R27C	TCEA1	P23193	10|9|2	1|1|0|3|1|2|0|0|0|3|0|11|8|0|13|3|2	7	2.48	0.363151	0.38	0.15	0.371575	FALSE
SARS2_nsp2_D23Y_R27C	SFPQ	P23246	8|7|10	1|10|6|8|2|2|2|2|5|4|1|11|8|6|13|11|9	8.33	1.4	0.351638	0	0.65	0.175819	FALSE
SARS2_nsp2_D23Y_R27C	PPIB	P23284	24|22|17	21|25|24|22|20|21|18|18|23|20|21|23|21|28|28|28|22	21	0.93	0.329198	0	0.71	0.164599	FALSE
SARS2_nsp2_D23Y_R27C	RPS3	P23396	18|15|14	21|10|15|15|8|5|6|12|12|12|8|10|12|13|15|14|9	15.67	1.35	0.332326	0	0.69	0.166163	FALSE
SARS2_nsp2_D23Y_R27C	CFL1	P23528	6|5|5	6|7|6|6|5|6|2|3|8|2|4|7|7|4|5|6|5	5.33	1.02	0.335683	0	0.67	0.167841	FALSE
SARS2_nsp2_D23Y_R27C	EIF4B	P23588	3|1|0	0|0|0|1|0|0|0|0|0|0|0|5|2|0|3|0|0	1.33	2.06	0.276842	0.22	0.36	0.248421	FALSE
SARS2_nsp2_D23Y_R27C	RRM1	P23921	2|1|3	2|0|0|1|0|0|0|0|0|2|1|3|4|3|1|0|3	2	1.7	0.395288	0.13	0.42	0.262644	FALSE
SARS2_nsp2_D23Y_R27C	ATP5PB	P24539	3|1|0	0|0|0|0|0|0|0|0|0|0|0|0|0|0|0|0|0	1.33	13.33	0.196811	0.33	0.19	0.263405	FALSE
SARS2_nsp2_D23Y_R27C	ACP1	P24666	0|0|1	2|0|2|3|2|0|0|1|3|0|1|0|2|0|0|2|1	0.33	0.3	0.0160201	0	0.71	0.00801007	FALSE
SARS2_nsp2_D23Y_R27C	MCM3	P25205	6|5|3	6|4|4|3|4|0|0|2|3|2|7|9|8|3|10|5|6	4.67	1.04	0.335961	0	0.65	0.16798	FALSE
SARS2_nsp2_D23Y_R27C	RPS12	P25398	8|7|7	8|7|7|7|5|3|4|4|9|2|3|11|11|7|5|5|6	7.33	1.2	0.335961	0	0.67	0.16798	FALSE
SARS2_nsp2_D23Y_R27C	ATP5F1A	P25705	13|16|13	4|5|7|4|8|5|3|4|5|6|4|11|9|9|7|5|10	14	2.25	0.338311	0.11	0.44	0.224156	FALSE
SARS2_nsp2_D23Y_R27C	PSMA1	P25786	0|1|1	0|0|1|0|0|0|0|0|0|0|0|2|1|0|2|1|1	0.67	1.42	0.302415	0	0.71	0.151207	FALSE
SARS2_nsp2_D23Y_R27C	PSMA3	P25788	1|0|1	0|0|0|0|0|0|0|0|0|0|0|0|0|0|0|0|0	0.67	6.67	0.879292	0	0.71	0.439646	FALSE
SARS2_nsp2_D23Y_R27C	MSN	P26038	9|3|1	0|0|0|0|0|0|0|0|0|0|0|10|2|0|6|0|0	4.33	4.09	0.350448	0.48	0.13	0.415224	FALSE
SARS2_nsp2_D23Y_R27C	DDX6	P26196	3|3|3	1|3|1|1|3|3|0|0|3|1|2|8|5|4|2|5|2	3	1.16	0.351519	0	0.6	0.175759	FALSE
SARS2_nsp2_D23Y_R27C	DNMT1	P26358	1|1|0	0|0|0|0|0|0|0|0|0|0|0|2|0|0|2|0|0	0.67	2.83	0.250278	0	0.71	0.125139	FALSE
SARS2_nsp2_D23Y_R27C	U2AF2	P26368	20|14|13	15|16|16|24|18|16|11|13|16|10|11|21|23|17|28|26|23	15.67	0.88	0.329401	0	0.71	0.164701	FALSE
SARS2_nsp2_D23Y_R27C	RPL13	P26373	6|4|5	3|4|6|4|1|3|3|3|5|4|3|3|4|0|10|1|1	5	1.47	0.333552	0.01	0.59	0.171776	FALSE
SARS2_nsp2_D23Y_R27C	HMGB2	P26583	18|12|11	9|13|12|20|16|14|4|13|13|7|10|20|16|17|18|20|11	13.67	1	0.328514	0	0.7	0.164257	FALSE
SARS2_nsp2_D23Y_R27C	PTBP1	P26599	6|1|3	7|7|6|6|3|3|2|3|8|5|4|8|5|5|10|2|3	3.33	0.65	0.27754	0	0.67	0.13877	FALSE
SARS2_nsp2_D23Y_R27C	EEF1G	P26641	5|6|4	5|3|6|5|5|3|5|4|4|2|4|7|7|6|7|6|8	5	0.98	0.33368	0	0.67	0.16684	FALSE
SARS2_nsp2_D23Y_R27C	FKBP2	P26885	1|0|1	1|2|2|2|1|1|1|0|2|1|1|1|1|1|1|2|1	0.67	0.54	0.210941	0	0.71	0.105471	FALSE
SARS2_nsp2_D23Y_R27C	YWHAQ	P27348	0|0|1	0|0|0|1|0|0|0|0|0|0|0|0|0|0|0|0|0	0.33	3.33	0.0221645	0	0.71	0.0110822	FALSE
SARS2_nsp2_D23Y_R27C	RPL10	P27635	5|5|7	7|6|6|6|5|5|5|7|6|3|3|6|5|7|7|8|5	5.67	0.99	0.326963	0	0.68	0.163481	FALSE
SARS2_nsp2_D23Y_R27C	APEX1	P27695	16|11|8	6|5|3|15|8|5|2|4|2|2|3|17|16|7|21|15|5	11.67	1.46	0.343687	0	0.65	0.171844	FALSE
SARS2_nsp2_D23Y_R27C	MAP4	P27816	5|5|6	6|2|3|4|2|4|3|2|4|4|3|7|5|2|3|2|4	5.33	1.51	0.352282	0	0.6	0.176141	FALSE
SARS2_nsp2_D23Y_R27C	CANX	P27824	3|2|4	0|0|0|0|0|0|0|0|0|0|0|0|0|0|0|0|0	3	30	0.317619	0.98	0	0.64881	FALSE
SARS2_nsp2_D23Y_R27C	PSMB4	P28070	1|1|3	2|2|2|0|1|1|3|0|1|5|3|5|5|4|3|4|4	1.67	0.63	0.286979	0	0.63	0.143489	FALSE
SARS2_nsp2_D23Y_R27C	ABCD3	P28288	1|2|1	0|0|0|0|0|0|0|0|0|0|0|0|0|0|0|0|0	1.33	13.33	0.304297	0.32	0.22	0.312148	FALSE
SARS2_nsp2_D23Y_R27C	GRN	P28799	1|1|1	0|0|2|2|3|0|0|3|1|0|0|1|0|0|2|2|2	1	0.94	0.355352	0	0.71	0.177676	FALSE
SARS2_nsp2_D23Y_R27C	MPG	P29372	10|7|7	6|6|8|8|10|4|6|6|7|8|6|8|9|6|8|8|7	8	1.12	0.334176	0	0.68	0.167088	FALSE
SARS2_nsp2_D23Y_R27C	EEF1D	P29692	4|3|3	2|1|4|1|4|3|3|3|6|2|3|7|6|4|7|7|7	3.33	0.81	0.338282	0	0.71	0.169141	FALSE
SARS2_nsp2_D23Y_R27C	ERP29	P30040	2|0|0	0|0|0|0|0|0|0|0|0|1|0|4|2|0|2|0|0	0.67	1.26	0.0856181	0.18	0.39	0.132809	FALSE
SARS2_nsp2_D23Y_R27C	PRDX6	P30041	1|1|1	3|6|5|4|3|2|1|1|2|2|1|6|4|3|4|2|0	1	0.35	0.319091	0	0.71	0.159546	FALSE
SARS2_nsp2_D23Y_R27C	PRDX3	P30048	2|1|3	3|1|4|2|2|0|0|1|2|2|3|1|3|2|2|2|1	2	1.1	0.307835	0.02	0.55	0.163917	FALSE
SARS2_nsp2_D23Y_R27C	ATP5F1D	P30049	1|0|1	0|0|0|0|0|0|0|0|0|0|0|0|0|0|0|0|0	0.67	6.67	0.259859	0	0.71	0.129929	FALSE
SARS2_nsp2_D23Y_R27C	RPL12	P30050	1|0|1	2|5|5|4|0|0|2|0|5|0|0|2|2|0|4|0|0	0.67	0.37	0.201372	0	0.71	0.100686	FALSE
SARS2_nsp2_D23Y_R27C	PDIA3	P30101	4|4|7	8|7|8|9|6|4|2|4|8|7|6|12|5|4|9|5|7	5	0.77	0.312918	0	0.69	0.156459	FALSE
SARS2_nsp2_D23Y_R27C	NMT1	P30419	7|4|3	0|0|0|2|0|0|0|0|0|0|1|7|6|3|10|5|0	4.67	2.33	0.422319	0.27	0.32	0.34616	FALSE
SARS2_nsp2_D23Y_R27C	LRPAP1	P30533	6|4|4	2|7|2|7|4|3|1|1|2|5|3|9|8|5|10|7|3	4.67	1	0.34388	0	0.66	0.17194	FALSE
SARS2_nsp2_D23Y_R27C	SRI	P30626	2|1|1	0|0|0|0|0|0|0|0|0|0|0|3|2|5|1|1|0	1.33	1.89	0.650087	0.14	0.41	0.395044	FALSE
SARS2_nsp2_D23Y_R27C	SDHA	P31040	3|0|3	2|0|2|1|0|0|0|0|1|0|0|2|2|0|0|0|3	2	2.62	0.217943	0.39	0.15	0.303972	FALSE
SARS2_nsp2_D23Y_R27C	MAT2A	P31153	2|1|2	1|0|1|1|1|0|1|1|2|0|1|1|1|1|2|2|2	1.67	1.57	0.334613	0.09	0.46	0.212307	FALSE
SARS2_nsp2_D23Y_R27C	DNAJA1	P31689	2|1|1	0|0|2|6|7|0|0|7|1|1|1|1|1|2|9|7|4	1.33	0.46	0.302617	0	0.71	0.151308	FALSE
SARS2_nsp2_D23Y_R27C	UQCRC1	P31930	2|2|1	0|0|0|0|0|0|0|0|0|0|0|0|0|0|0|1|1	1.67	14.17	0.44565	0.63	0.1	0.537825	FALSE
SARS2_nsp2_D23Y_R27C	HNRNPH3	P31942	0|0|2	0|2|1|7|0|0|0|0|0|0|0|0|0|0|2|0|0	0.67	0.94	0.0487999	0.17	0.4	0.1094	FALSE
SARS2_nsp2_D23Y_R27C	HNRNPH1	P31943	2|2|3	1|4|3|3|0|1|1|2|2|1|3|3|3|2|3|1|4	2.33	1.07	0.325176	0	0.6	0.162588	FALSE
SARS2_nsp2_D23Y_R27C	ARRB2	P32121	18|14|14	14|12|17|10|9|8|10|8|15|5|8|20|21|17|16|15|13	15.33	1.2	0.345427	0	0.7	0.172713	FALSE
SARS2_nsp2_D23Y_R27C	RPL9	P32969	4|7|9	6|8|10|12|8|6|6|7|5|4|8|9|7|4|13|6|6	6.67	0.91	0.30768	0	0.69	0.15384	FALSE
SARS2_nsp2_D23Y_R27C	KIF5B	P33176	0|1|0	0|0|0|0|0|0|0|0|0|0|0|0|0|0|0|0|0	0.33	3.33	0.68551	0	0.71	0.342755	FALSE
SARS2_nsp2_D23Y_R27C	CYP2C19	P33261	0|0|1	0|0|0|0|0|0|0|0|0|0|0|0|0|0|0|0|0	0.33	3.33	0.68551	0	0.71	0.342755	FALSE
SARS2_nsp2_D23Y_R27C	DUT	P33316	3|2|1	4|5|5|6|5|5|5|5|6|2|3|3|4|3|4|7|4	2	0.45	0.301863	0	0.71	0.150932	FALSE
SARS2_nsp2_D23Y_R27C	MCM5	P33992	2|1|1	4|3|3|3|1|1|1|1|2|7|2|5|4|5|6|4|5	1.33	0.4	0.308805	0	0.71	0.154402	FALSE
SARS2_nsp2_D23Y_R27C	HSPA4	P34932	5|5|7	0|0|0|0|0|0|0|0|0|0|0|0|0|0|1|2|6	5.67	10.7	0.350935	0.92	0.01	0.635468	FALSE
SARS2_nsp2_D23Y_R27C	PHB	P35232	2|5|5	4|4|10|3|6|3|8|4|6|7|6|9|9|9|7|9|6	4	0.62	0.29978	0	0.71	0.14989	FALSE
SARS2_nsp2_D23Y_R27C	RDX	P35241	2|1|0	0|0|0|0|0|0|0|0|0|0|0|3|2|0|4|0|0	1	1.89	0.265355	0.19	0.38	0.227677	FALSE
SARS2_nsp2_D23Y_R27C	RPL22	P35268	8|11|12	5|6|5|7|10|7|6|8|7|7|7|9|9|10|9|7|11	10.33	1.35	0.333122	0	0.67	0.166561	FALSE
SARS2_nsp2_D23Y_R27C	GTF2F1	P35269	3|5|3	0|0|0|3|1|1|0|0|0|1|0|9|6|5|9|5|3	3.67	1.45	0.418122	0.03	0.53	0.224061	FALSE
SARS2_nsp2_D23Y_R27C	KRT9	P35527	1|1|2	0|0|0|0|1|0|0|0|0|0|0|0|1|1|1|1|1	1.33	3.78	0.452259	0.22	0.36	0.33613	FALSE
SARS2_nsp2_D23Y_R27C	AGL	P35573	1|0|0	0|0|0|0|0|0|0|0|0|0|0|1|2|2|1|1|1	0.33	0.71	0.171853	0	0.71	0.0859265	FALSE
SARS2_nsp2_D23Y_R27C	MYH9	P35579	5|4|6	0|0|0|0|0|0|0|0|0|0|0|0|0|0|2|0|0	5	42.5	0.334913	0.99	0	0.662456	FALSE
SARS2_nsp2_D23Y_R27C	MYH10	P35580	3|4|4	0|0|0|0|0|0|0|0|0|0|0|0|0|0|0|1|0	3.67	36.67	0.336542	1	0	0.668271	FALSE
SARS2_nsp2_D23Y_R27C	BSG	P35613	4|1|3	0|0|0|0|0|0|0|0|0|0|0|0|0|0|0|0|0	2.67	26.67	0.340611	0.66	0.04	0.500305	FALSE
SARS2_nsp2_D23Y_R27C	FUS	P35637	1|1|2	1|2|4|2|0|0|0|0|2|2|1|2|1|1|3|1|1	1.33	0.99	0.325555	0.02	0.55	0.172778	FALSE
SARS2_nsp2_D23Y_R27C	DEK	P35659	13|12|10	9|11|12|16|13|6|7|10|12|8|8|14|12|11|16|12|15	11.67	1.03	0.334068	0	0.7	0.167034	FALSE
SARS2_nsp2_D23Y_R27C	GLRX	P35754	1|1|1	0|0|0|0|0|0|0|0|1|0|0|1|2|0|0|1|1	1	2.83	0.467953	0	0.71	0.233976	FALSE
SARS2_nsp2_D23Y_R27C	PSMC2	P35998	1|0|2	0|0|0|0|0|0|0|0|0|0|0|1|1|1|0|3|3	1	1.89	0.236779	0.17	0.39	0.20339	FALSE
SARS2_nsp2_D23Y_R27C	ATP5F1C	P36542	2|3|2	0|0|0|2|0|0|0|0|0|2|0|0|2|1|3|3|1	2.33	2.83	0.325612	0.36	0.16	0.342806	FALSE
SARS2_nsp2_D23Y_R27C	RPL4	P36578	0|1|2	0|5|8|8|0|0|0|0|6|0|0|0|0|0|4|0|1	1	0.53	0.185451	0.01	0.59	0.0977253	FALSE
SARS2_nsp2_D23Y_R27C	GNL1	P36915	1|0|0	0|0|0|0|0|0|0|0|0|0|0|1|0|0|0|0|0	0.33	3.33	0.185993	0	0.71	0.0929967	FALSE
SARS2_nsp2_D23Y_R27C	GPX4	P36969	5|2|4	2|3|3|4|3|0|0|2|3|0|0|3|3|4|3|2|3	3.67	1.64	0.328375	0.06	0.49	0.194188	FALSE
SARS2_nsp2_D23Y_R27C	SRP14	P37108	4|5|4	2|3|3|3|5|2|1|3|3|2|3|6|5|2|2|2|2	4.33	1.5	0.341123	0.01	0.57	0.175561	FALSE
SARS2_nsp2_D23Y_R27C	TAGLN2	P37802	1|1|1	2|1|1|1|0|0|0|0|3|0|1|2|2|1|1|1|1	1	1	0.330945	0	0.71	0.165472	FALSE
SARS2_nsp2_D23Y_R27C	RBMX	P38159	0|0|2	0|2|2|1|0|0|0|0|1|0|0|0|0|0|0|0|0	0.67	1.89	0.0491557	0.22	0.36	0.134578	FALSE
SARS2_nsp2_D23Y_R27C	COIL	P38432	0|1|0	0|0|0|0|0|0|0|0|0|0|0|0|1|0|0|0|0	0.33	3.33	0.17006	0	0.71	0.0850298	FALSE
SARS2_nsp2_D23Y_R27C	HSPA9	P38646	31|28|28	17|12|18|17|18|15|12|9|13|14|15|22|16|17|24|22|25	29	1.72	0.334229	0	0.69	0.167115	FALSE
SARS2_nsp2_D23Y_R27C	EIF4A3	P38919	0|1|1	1|2|2|1|0|0|1|0|1|0|0|1|1|0|1|0|1	0.67	0.94	0.221094	0	0.71	0.110547	FALSE
SARS2_nsp2_D23Y_R27C	RPS19	P39019	11|9|10	14|12|9|14|6|4|5|7|8|10|8|9|10|9|10|8|8	10	1.13	0.333878	0	0.69	0.166939	FALSE
SARS2_nsp2_D23Y_R27C	RPL3	P39023	0|0|1	1|7|9|4|0|0|0|0|9|0|0|0|0|0|3|0|0	0.33	0.17	0.00285457	0	0.71	0.00142728	FALSE
SARS2_nsp2_D23Y_R27C	DDOST	P39656	1|2|2	0|0|0|0|0|0|0|0|0|0|0|0|0|0|0|0|0	1.67	16.67	0.326126	0.64	0.08	0.483063	FALSE
SARS2_nsp2_D23Y_R27C	FEN1	P39748	8|13|7	11|9|3|14|9|4|2|1|1|5|10|15|13|8|19|15|9	9.33	1.07	0.329353	0	0.68	0.164677	FALSE
SARS2_nsp2_D23Y_R27C	CCT6A	P40227	10|11|11	0|0|0|1|0|0|0|0|1|0|0|4|6|5|6|9|10	10.67	4.32	0.427103	0.79	0.02	0.608552	FALSE
SARS2_nsp2_D23Y_R27C	HADHA	P40939	1|0|2	0|0|1|3|0|0|0|0|0|0|0|0|0|0|0|0|0	1	4.25	0.183969	0.26	0.32	0.221985	FALSE
SARS2_nsp2_D23Y_R27C	EIF2S3	P41091	1|1|1	0|0|0|1|0|0|0|0|0|0|0|1|1|1|3|2|0	1	1.89	0.475544	0	0.71	0.237772	FALSE
SARS2_nsp2_D23Y_R27C	EIF2D	P41214	3|2|1	0|0|0|2|0|0|0|0|0|0|0|2|2|0|1|0|0	2	4.86	0.546179	0.46	0.13	0.50309	FALSE
SARS2_nsp2_D23Y_R27C	BUD31	P41223	6|4|4	3|3|3|4|4|1|2|3|3|3|2|7|7|4|7|4|5	4.67	1.22	0.346773	0	0.63	0.173386	FALSE
SARS2_nsp2_D23Y_R27C	NAA10	P41227	1|1|0	0|0|0|0|0|0|0|0|0|0|0|1|1|0|1|1|0	0.67	2.83	0.365503	0	0.71	0.182752	FALSE
SARS2_nsp2_D23Y_R27C	CSK	P41240	0|0|1	0|0|0|0|0|0|0|0|1|0|0|1|1|0|0|0|0	0.33	1.89	0.0707044	0	0.71	0.0353522	FALSE
SARS2_nsp2_D23Y_R27C	EIF1	P41567	2|1|1	0|0|0|2|1|0|0|0|0|0|0|3|1|0|4|2|1	1.33	1.62	0.352257	0.1	0.45	0.226129	FALSE
SARS2_nsp2_D23Y_R27C	TMPO	P42166	1|0|1	0|0|0|4|0|0|0|0|0|0|0|1|0|0|0|0|0	0.67	2.27	0.357251	0	0.71	0.178625	FALSE
SARS2_nsp2_D23Y_R27C	TMPO	P42167	3|2|3	0|0|0|0|0|0|0|0|0|0|0|0|0|0|1|0|0	2.67	26.67	0.404218	0.98	0	0.692109	FALSE
SARS2_nsp2_D23Y_R27C	CASP2	P42575	3|0|2	2|1|1|0|0|0|0|0|1|1|1|3|1|2|0|0|0	1.67	2.18	0.271484	0.3	0.3	0.285742	FALSE
SARS2_nsp2_D23Y_R27C	RPS27	P42677	3|4|3	4|5|3|5|2|2|4|4|4|2|2|4|3|5|4|4|4	3.33	0.93	0.322803	0	0.65	0.161402	FALSE
SARS2_nsp2_D23Y_R27C	RPL35	P42766	2|5|3	5|2|2|3|3|3|3|3|4|2|4|2|3|4|2|2|3	3.33	1.13	0.309698	0.01	0.59	0.159849	FALSE
SARS2_nsp2_D23Y_R27C	MATR3	P43243	0|0|2	0|14|10|5|0|0|0|0|4|0|0|0|0|0|5|0|0	0.67	0.3	0.00640561	0	0.71	0.00320281	FALSE
SARS2_nsp2_D23Y_R27C	RANBP1	P43487	2|3|1	1|0|0|0|0|0|0|0|0|0|1|1|0|0|0|0|0	2	11.33	0.362414	0.62	0.1	0.491207	FALSE
SARS2_nsp2_D23Y_R27C	VDAC2	P45880	9|14|11	0|0|0|0|0|0|0|0|0|0|0|1|0|0|0|0|0	11.33	113.33	0.354911	1	0	0.677455	FALSE
SARS2_nsp2_D23Y_R27C	CBX5	P45973	1|0|1	0|1|1|1|1|0|0|0|0|0|1|1|0|1|4|0|0	0.67	1.03	0.242707	0	0.71	0.121353	FALSE
SARS2_nsp2_D23Y_R27C	CRKL	P46109	13|11|11	18|15|15|18|16|12|15|12|18|14|14|12|12|16|16|19|19	11.67	0.76	0.327576	0	0.71	0.163788	FALSE
SARS2_nsp2_D23Y_R27C	NSF	P46459	1|0|2	0|0|0|0|0|0|0|0|0|0|0|0|0|0|0|0|0	1	10	0.536296	0.32	0.22	0.428148	FALSE
SARS2_nsp2_D23Y_R27C	RPL27A	P46776	1|1|1	0|3|3|2|2|2|2|1|2|1|1|2|1|0|3|1|0	1	0.65	0.318766	0	0.71	0.159383	FALSE
SARS2_nsp2_D23Y_R27C	RPL5	P46777	7|8|3	0|2|1|10|0|0|0|0|1|0|0|11|7|3|11|2|0	6	2.12	0.370572	0.19	0.37	0.280286	FALSE
SARS2_nsp2_D23Y_R27C	RPL21	P46778	5|5|4	4|4|3|4|4|3|1|1|2|3|1|5|5|7|5|4|4	4.67	1.32	0.339047	0	0.62	0.169523	FALSE
SARS2_nsp2_D23Y_R27C	RPL28	P46779	3|4|3	1|2|2|2|2|2|1|2|3|1|2|1|2|1|3|2|1	3.33	1.89	0.341177	0.09	0.46	0.215589	FALSE
SARS2_nsp2_D23Y_R27C	RPS9	P46781	4|2|4	1|4|4|4|3|6|2|2|6|6|5|6|5|3|4|2|3	3.33	0.86	0.315691	0	0.66	0.157846	FALSE
SARS2_nsp2_D23Y_R27C	RPS5	P46782	12|7|5	6|7|2|10|4|3|3|2|3|4|2|6|7|4|6|4|4	8	1.77	0.323905	0.19	0.38	0.256952	FALSE
SARS2_nsp2_D23Y_R27C	RPS10	P46783	6|5|4	5|4|2|7|3|1|1|4|2|3|4|6|3|2|8|5|5	5	1.31	0.336106	0	0.62	0.168053	FALSE
SARS2_nsp2_D23Y_R27C	CAPZB	P47756	5|4|5	2|1|3|4|2|1|0|3|3|0|1|3|3|3|3|3|2	4.67	2.14	0.379417	0.12	0.43	0.249709	FALSE
SARS2_nsp2_D23Y_R27C	EIF1AX	P47813	2|2|3	1|2|2|1|2|1|2|1|1|0|0|2|2|2|2|3|3	2.33	1.47	0.344521	0.04	0.5	0.192261	FALSE
SARS2_nsp2_D23Y_R27C	RPL29	P47914	1|1|1	1|1|1|1|1|0|0|1|1|0|1|1|1|0|1|0|0	1	1.55	0.335212	0	0.71	0.167606	FALSE
SARS2_nsp2_D23Y_R27C	ATP5PO	P48047	7|4|6	1|0|1|1|1|0|0|0|1|1|1|1|1|1|1|1|1	5.67	7.41	0.382674	0.94	0.01	0.661337	FALSE
SARS2_nsp2_D23Y_R27C	ARCN1	P48444	1|0|0	0|0|0|0|0|0|0|0|0|0|0|1|0|0|4|0|0	0.33	1.13	0.00582263	0	0.71	0.00291132	FALSE
SARS2_nsp2_D23Y_R27C	GCLM	P48507	1|1|2	2|1|1|1|1|1|1|1|4|2|2|2|3|2|4|2|1	1.33	0.73	0.315531	0	0.6	0.157766	FALSE
SARS2_nsp2_D23Y_R27C	CCT5	P48643	11|7|8	0|1|0|0|1|0|0|1|0|0|0|5|3|4|7|8|7	8.67	3.98	0.39578	0.68	0.03	0.53789	FALSE
SARS2_nsp2_D23Y_R27C	MARCKSL1	P49006	1|1|0	0|0|0|0|0|0|0|0|0|0|0|0|0|0|0|0|0	0.67	6.67	0.262564	0	0.71	0.131282	FALSE
SARS2_nsp2_D23Y_R27C	RPL34	P49207	0|1|0	0|2|0|0|0|0|0|0|0|0|1|0|1|0|2|1|0	0.33	0.81	0.0106667	0	0.71	0.00533337	FALSE
SARS2_nsp2_D23Y_R27C	FASN	P49327	15|13|14	0|0|0|1|0|0|0|0|0|0|0|2|4|2|1|4|4	14	13.22	0.617464	1	0	0.808732	TRUE
SARS2_nsp2_D23Y_R27C	CCT3	P49368	14|15|12	0|0|1|0|2|0|0|0|1|0|0|7|5|3|10|14|11	13.67	4.3	0.405533	0.79	0.02	0.597766	FALSE
SARS2_nsp2_D23Y_R27C	TUFM	P49411	2|0|2	3|0|0|0|0|0|0|0|2|4|1|1|4|4|0|0|2	1.33	1.08	0.201766	0.07	0.48	0.135883	FALSE
SARS2_nsp2_D23Y_R27C	SRP9	P49458	1|2|3	1|2|4|5|4|2|3|3|4|1|1|5|3|2|4|4|4	2	0.65	0.292235	0	0.71	0.146118	FALSE
SARS2_nsp2_D23Y_R27C	CSNK1E	P49674	1|1|1	1|3|0|3|1|2|1|1|2|2|1|1|1|0|1|1|1	1	0.77	0.321306	0	0.71	0.160653	FALSE
SARS2_nsp2_D23Y_R27C	MCM2	P49736	0|1|0	0|0|0|0|0|0|0|0|0|0|0|0|0|0|0|0|0	0.33	3.33	0.68551	0	0.71	0.342755	FALSE
SARS2_nsp2_D23Y_R27C	RBM25	P49756	10|5|5	6|4|4|5|3|3|3|1|4|2|2|14|11|9|6|11|5	6.67	1.22	0.342402	0	0.63	0.171201	FALSE
SARS2_nsp2_D23Y_R27C	NUMB	P49757	1|0|0	0|0|0|0|0|0|0|0|0|0|0|1|1|0|1|0|0	0.33	1.89	0.352963	0	0.71	0.176482	FALSE
SARS2_nsp2_D23Y_R27C	GMPS	P49915	2|1|1	0|3|1|2|1|2|2|2|1|1|3|2|2|3|0|1|0	1.33	0.87	0.324529	0.01	0.57	0.167264	FALSE
SARS2_nsp2_D23Y_R27C	EMD	P50402	6|3|6	1|0|2|2|0|0|0|0|1|0|0|0|0|0|1|1|2	5	8.5	0.33799	0.92	0.01	0.628995	FALSE
SARS2_nsp2_D23Y_R27C	SERPINH1	P50454	0|0|1	1|0|3|2|0|0|0|1|1|2|2|3|1|1|3|1|1	0.33	0.26	0.00235556	0	0.71	0.00117778	FALSE
SARS2_nsp2_D23Y_R27C	METAP2	P50579	3|1|0	0|0|0|1|0|0|0|0|0|0|0|4|3|0|4|1|0	1.33	1.74	0.252686	0.2	0.37	0.226343	FALSE
SARS2_nsp2_D23Y_R27C	CDK9	P50750	0|0|1	0|0|0|1|1|0|0|0|0|0|0|1|2|0|2|0|1	0.33	0.71	0.020601	0	0.71	0.0103005	FALSE
SARS2_nsp2_D23Y_R27C	RPL14	P50914	0|0|2	3|5|4|1|0|0|1|0|3|0|1|0|0|0|0|0|1	0.67	0.6	0.0101811	0.05	0.5	0.0300906	FALSE
SARS2_nsp2_D23Y_R27C	CCT8	P50990	18|12|15	1|0|0|0|0|1|0|0|0|0|1|8|9|5|12|13|14	15	3.98	0.407022	0.71	0.03	0.558511	FALSE
SARS2_nsp2_D23Y_R27C	CCT4	P50991	8|12|11	0|0|1|2|5|0|1|2|0|1|1|6|4|3|11|6|6	10.33	3.59	0.368526	0.63	0.1	0.499263	FALSE
SARS2_nsp2_D23Y_R27C	DAP	P51397	1|1|0	0|1|1|0|1|0|1|1|1|1|0|2|1|2|0|2|1	0.67	0.76	0.228078	0	0.71	0.114039	FALSE
SARS2_nsp2_D23Y_R27C	SSR4	P51571	1|0|0	1|1|1|1|0|1|1|1|1|1|0|0|0|1|0|0|0	0.33	0.57	0.00274485	0	0.71	0.00137242	FALSE
SARS2_nsp2_D23Y_R27C	HSD17B4	P51659	1|0|0	0|0|0|0|0|0|0|0|0|0|0|0|0|0|1|0|0	0.33	3.33	0.184759	0	0.71	0.0923794	FALSE
SARS2_nsp2_D23Y_R27C	HDGF	P51858	2|1|0	0|2|2|3|0|1|0|1|1|0|1|4|3|2|2|2|2	1	0.65	0.219967	0.01	0.57	0.114983	FALSE
SARS2_nsp2_D23Y_R27C	NDUFA8	P51970	1|0|1	1|3|2|2|1|0|0|0|1|1|0|1|1|4|5|2|2	0.67	0.44	0.202382	0	0.71	0.101191	FALSE
SARS2_nsp2_D23Y_R27C	HNRNPA3	P51991	0|0|3	1|9|10|6|0|0|0|0|4|1|0|0|0|1|7|1|1	1	0.41	0.0161255	0	0.6	0.00806273	FALSE
SARS2_nsp2_D23Y_R27C	HNRNPM	P52272	5|4|8	7|16|12|8|2|1|3|2|12|4|3|5|5|1|7|2|3	5.67	1.04	0.309441	0	0.66	0.154721	FALSE
SARS2_nsp2_D23Y_R27C	RAP1GDS1	P52306	15|9|10	0|0|0|0|0|0|0|0|0|0|0|0|0|0|0|0|0	11.33	113.33	0.990855	1	0	0.995427	TRUE
SARS2_nsp2_D23Y_R27C	HNRNPF	P52597	4|1|5	4|6|3|12|2|1|0|1|5|1|4|5|5|5|5|5|7	3.33	0.8	0.280417	0	0.66	0.140208	FALSE
SARS2_nsp2_D23Y_R27C	CAPZA1	P52907	5|4|4	1|0|0|1|0|1|0|1|3|1|1|5|3|4|3|4|5	4.33	2.23	0.396563	0.16	0.4	0.278282	FALSE
SARS2_nsp2_D23Y_R27C	HMGA2	P52926	0|2|1	0|0|0|1|1|1|1|1|2|0|0|2|1|0|2|0|2	1	1.21	0.220821	0.08	0.46	0.150411	FALSE
SARS2_nsp2_D23Y_R27C	SLC25A1	P53007	1|0|0	0|0|0|0|0|0|0|0|0|0|0|0|0|0|0|0|0	0.33	3.33	0.00453876	0	0.71	0.00226938	FALSE
SARS2_nsp2_D23Y_R27C	PLK1	P53350	1|1|0	6|8|6|2|2|1|0|3|5|1|3|0|1|2|0|0|0	0.67	0.28	0.200881	0	0.71	0.100441	FALSE
SARS2_nsp2_D23Y_R27C	NUBP1	P53384	1|2|2	1|1|3|2|1|0|1|0|1|0|0|3|4|2|3|1|3	1.67	1.09	0.352396	0.02	0.55	0.186198	FALSE
SARS2_nsp2_D23Y_R27C	ACLY	P53396	4|1|2	0|0|0|0|0|0|0|0|0|0|0|0|0|0|0|0|0	2.33	23.33	0.833944	0.65	0.05	0.741972	TRUE
SARS2_nsp2_D23Y_R27C	METAP1	P53582	2|2|1	0|0|0|2|0|0|0|0|0|0|0|1|1|0|3|0|0	1.67	4.05	0.496419	0.39	0.15	0.44321	FALSE
SARS2_nsp2_D23Y_R27C	SUCLG1	P53597	1|1|0	0|0|1|1|1|0|0|0|0|0|0|0|1|0|1|1|2	0.67	1.42	0.218354	0	0.71	0.109177	FALSE
SARS2_nsp2_D23Y_R27C	COPA	P53621	1|0|0	0|0|0|0|0|0|0|0|0|0|0|0|0|0|0|0|0	0.33	3.33	0.00639563	0	0.71	0.00319782	FALSE
SARS2_nsp2_D23Y_R27C	SLC16A1	P53985	0|0|1	0|0|0|0|0|0|0|0|0|0|0|0|0|0|0|0|0	0.33	3.33	0.00544943	0	0.71	0.00272471	FALSE
SARS2_nsp2_D23Y_R27C	SUB1	P53999	13|16|10	12|13|15|15|13|11|12|10|13|11|11|18|17|14|21|13|18	13	0.93	0.32478	0	0.71	0.16239	FALSE
SARS2_nsp2_D23Y_R27C	YARS1	P54577	18|10|1	0|0|0|4|0|0|0|0|0|0|0|21|7|0|26|3|0	9.67	2.69	0.376493	0.41	0.15	0.393246	FALSE
SARS2_nsp2_D23Y_R27C	AK2	P54819	1|0|1	1|0|3|1|0|0|0|0|0|0|0|2|1|1|0|1|2	0.67	0.94	0.24326	0	0.71	0.12163	FALSE
SARS2_nsp2_D23Y_R27C	ALDH18A1	P54886	3|1|4	6|1|5|3|0|1|2|3|5|5|5|3|4|1|3|5|6	2.67	0.78	0.299842	0	0.65	0.149921	FALSE
SARS2_nsp2_D23Y_R27C	EIF5	P55010	7|3|2	0|0|0|5|0|0|0|0|0|1|0|9|6|3|8|2|0	4	2	0.385837	0.22	0.36	0.302919	FALSE
SARS2_nsp2_D23Y_R27C	PSMD4	P55036	4|1|0	0|0|0|0|0|0|0|0|0|0|0|5|3|1|2|2|2	1.67	1.89	0.362879	0.23	0.35	0.29644	FALSE
SARS2_nsp2_D23Y_R27C	CSE1L	P55060	2|2|1	0|0|0|0|0|0|0|0|0|0|0|0|0|0|0|0|0	1.67	16.67	0.332367	0.64	0.08	0.486183	FALSE
SARS2_nsp2_D23Y_R27C	VCP	P55072	5|4|7	0|0|0|0|0|0|0|0|0|0|0|0|0|0|0|1|2	5.33	30.22	0.443838	0.99	0	0.716919	FALSE
SARS2_nsp2_D23Y_R27C	MFAP1	P55081	3|6|7	4|4|3|3|4|4|4|3|5|1|2|6|4|3|7|6|6	5.33	1.31	0.344062	0	0.61	0.172031	FALSE
SARS2_nsp2_D23Y_R27C	HADHB	P55084	0|0|1	0|0|0|0|0|0|0|0|0|0|0|0|0|0|0|0|0	0.33	3.33	0.0440109	0	0.71	0.0220055	FALSE
SARS2_nsp2_D23Y_R27C	MANF	P55145	4|3|2	2|5|2|10|5|5|1|1|3|2|3|6|5|5|7|5|2	3	0.74	0.320186	0	0.71	0.160093	FALSE
SARS2_nsp2_D23Y_R27C	NAP1L1	P55209	1|0|1	0|0|0|3|0|0|0|0|0|0|0|0|0|0|1|1|0	0.67	2.27	0.230886	0	0.71	0.115443	FALSE
SARS2_nsp2_D23Y_R27C	SNU13	P55769	3|3|2	3|2|2|2|2|2|1|2|4|2|1|4|2|3|2|2|2	2.67	1.19	0.335341	0.01	0.58	0.17267	FALSE
SARS2_nsp2_D23Y_R27C	GFER	P55789	2|1|1	0|0|0|0|0|0|0|0|0|0|0|2|2|0|0|1|0	1.33	4.53	0.386513	0.24	0.35	0.313256	FALSE
SARS2_nsp2_D23Y_R27C	EIF3B	P55884	4|1|3	0|0|0|0|2|0|0|0|0|0|0|1|2|3|2|2|3	2.67	3.02	0.43735	0.4	0.15	0.418675	FALSE
SARS2_nsp2_D23Y_R27C	ATP5MF	P56134	2|0|2	0|0|0|0|0|0|0|0|0|0|0|0|0|0|0|0|0	1.33	13.33	0.255739	0.64	0.08	0.44787	FALSE
SARS2_nsp2_D23Y_R27C	RRP1	P56182	1|0|0	0|1|0|1|0|0|0|0|0|0|0|1|1|0|1|0|0	0.33	1.13	0.0294759	0	0.71	0.014738	FALSE
SARS2_nsp2_D23Y_R27C	MAZ	P56270	5|1|2	8|5|8|6|7|4|2|5|10|1|3|6|3|4|7|9|6	2.67	0.48	0.274168	0	0.71	0.137084	FALSE
SARS2_nsp2_D23Y_R27C	ATP5ME	P56385	1|0|0	0|0|0|0|0|0|0|0|0|0|0|0|0|0|0|0|0	0.33	3.33	0.0526868	0	0.71	0.0263434	FALSE
SARS2_nsp2_D23Y_R27C	EIF6	P56537	0|0|1	0|1|0|0|0|0|0|0|0|0|0|0|0|0|0|0|0	0.33	3.33	0.0651912	0	0.71	0.0325956	FALSE
SARS2_nsp2_D23Y_R27C	EEFSEC	P57772	0|1|0	0|0|0|0|0|0|0|0|0|0|0|0|1|0|0|0|0	0.33	3.33	0.322041	0	0.71	0.161021	FALSE
SARS2_nsp2_D23Y_R27C	MTPN	P58546	1|3|1	3|1|3|2|1|0|1|0|1|1|2|1|2|3|5|3|4	1.67	0.86	0.29532	0.01	0.57	0.15266	FALSE
SARS2_nsp2_D23Y_R27C	EIF3E	P60228	1|1|1	0|0|0|0|0|0|0|0|0|0|0|1|2|0|1|2|1	1	2.43	0.473693	0	0.71	0.236846	FALSE
SARS2_nsp2_D23Y_R27C	SEC61B	P60468	3|3|3	1|1|2|1|0|0|0|0|0|0|1|0|0|0|1|1|1	3	5.67	0.36857	0.77	0.02	0.569285	FALSE
SARS2_nsp2_D23Y_R27C	MYL6	P60660	4|2|3	0|0|0|0|0|0|0|0|0|0|0|0|0|0|0|0|1	3	30	0.494687	0.98	0	0.737343	FALSE
SARS2_nsp2_D23Y_R27C	ACTB	P60709	2|1|1	1|1|1|1|1|1|0|1|2|0|0|1|1|1|1|1|1	1.33	1.51	0.34324	0.07	0.48	0.20662	FALSE
SARS2_nsp2_D23Y_R27C	EIF4A1	P60842	1|1|0	0|0|1|1|0|0|0|0|0|0|0|0|1|2|0|0|0	0.67	2.27	0.237169	0	0.71	0.118584	FALSE
SARS2_nsp2_D23Y_R27C	RPS20	P60866	8|9|10	7|6|8|9|6|5|4|6|6|6|7|4|5|6|8|5|7	9	1.46	0.33332	0	0.65	0.16666	FALSE
SARS2_nsp2_D23Y_R27C	DSTN	P60981	0|1|1	1|1|2|2|2|2|0|1|1|0|0|2|1|1|2|2|3	0.67	0.49	0.210694	0	0.71	0.105347	FALSE
SARS2_nsp2_D23Y_R27C	UBE2M	P61081	0|0|1	0|0|0|0|0|0|0|0|0|0|0|0|1|0|0|0|0	0.33	3.33	0.547805	0	0.71	0.273903	FALSE
SARS2_nsp2_D23Y_R27C	ABCE1	P61221	1|0|0	1|0|0|0|0|1|1|0|0|0|1|0|0|0|1|0|0	0.33	1.13	0.0328337	0	0.71	0.0164169	FALSE
SARS2_nsp2_D23Y_R27C	RPS3A	P61247	13|11|9	9|15|15|16|15|10|6|8|12|7|7|14|11|10|13|9|8	11	1.01	0.333188	0	0.7	0.166594	FALSE
SARS2_nsp2_D23Y_R27C	PSME3	P61289	1|0|0	0|0|0|0|0|0|0|0|0|0|0|1|1|1|0|1|0	0.33	1.42	0.0808016	0	0.71	0.0404008	FALSE
SARS2_nsp2_D23Y_R27C	RPL15	P61313	0|0|1	0|4|2|3|0|0|0|0|2|0|0|0|0|0|3|0|0	0.33	0.4	0.00662989	0	0.71	0.00331494	FALSE
SARS2_nsp2_D23Y_R27C	RPL27	P61353	1|0|2	0|3|0|1|0|0|1|0|1|0|1|0|1|1|2|0|0	1	1.55	0.188296	0.12	0.43	0.154148	FALSE
SARS2_nsp2_D23Y_R27C	RPL37A	P61513	3|3|3	3|5|4|3|5|2|3|3|3|2|2|3|4|5|6|5|4	3	0.82	0.324122	0	0.71	0.162061	FALSE
SARS2_nsp2_D23Y_R27C	SEC61A1	P61619	0|0|1	0|0|0|0|0|0|0|0|0|0|0|1|0|0|0|0|0	0.33	3.33	0.00520133	0	0.71	0.00260066	FALSE
SARS2_nsp2_D23Y_R27C	HNRNPK	P61978	6|8|8	13|14|12|15|11|5|7|6|11|4|4|12|9|6|9|9|7	7.33	0.81	0.324977	0	0.71	0.162489	FALSE
SARS2_nsp2_D23Y_R27C	RPS7	P62081	15|17|12	11|19|12|15|19|11|9|14|12|12|11|24|14|13|18|12|12	14.67	1.05	0.328473	0	0.71	0.164237	FALSE
SARS2_nsp2_D23Y_R27C	PSMC1	P62191	1|1|0	0|0|0|0|0|0|0|0|0|0|0|0|0|0|1|1|1	0.67	3.78	0.275398	0	0.71	0.137699	FALSE
SARS2_nsp2_D23Y_R27C	PSMC5	P62195	4|2|0	0|0|0|1|0|0|0|0|0|0|0|0|1|0|2|1|2	2	4.86	0.287493	0.51	0.12	0.398747	FALSE
SARS2_nsp2_D23Y_R27C	RPS8	P62241	1|1|5	2|5|4|6|3|2|1|0|6|1|3|6|5|5|6|0|2	2.33	0.7	0.232226	0	0.62	0.116113	FALSE
SARS2_nsp2_D23Y_R27C	RPS15A	P62244	4|1|3	2|2|4|4|3|3|1|1|3|1|3|3|3|3|5|4|3	2.67	0.94	0.298076	0	0.61	0.149038	FALSE
SARS2_nsp2_D23Y_R27C	RPS16	P62249	9|8|10	12|8|10|11|7|6|4|6|10|8|6|7|9|10|7|5|5	9	1.17	0.326238	0	0.69	0.163119	FALSE
SARS2_nsp2_D23Y_R27C	YWHAE	P62258	1|1|1	0|1|1|1|0|0|0|0|2|0|0|2|1|1|2|2|0	1	1.31	0.328911	0	0.71	0.164455	FALSE
SARS2_nsp2_D23Y_R27C	RPS14	P62263	4|6|5	4|7|6|9|7|3|3|5|7|6|6|6|5|5|6|5|4	5	0.9	0.322596	0	0.68	0.161298	FALSE
SARS2_nsp2_D23Y_R27C	RPS23	P62266	6|6|2	9|7|7|8|5|7|6|8|9|6|7|9|9|7|7|5|6	4.67	0.65	0.297662	0	0.71	0.148831	FALSE
SARS2_nsp2_D23Y_R27C	RPS18	P62269	7|9|9	8|6|8|6|4|8|4|6|9|7|8|10|10|7|7|7|8	8.33	1.15	0.329134	0	0.68	0.164567	FALSE
SARS2_nsp2_D23Y_R27C	RPS29	P62273	6|4|4	5|3|5|4|2|1|1|5|4|1|1|1|1|3|4|2|3	4.67	1.72	0.338518	0.04	0.51	0.189259	FALSE
SARS2_nsp2_D23Y_R27C	RPS13	P62277	3|2|3	5|5|5|7|5|5|4|6|7|2|5|5|4|4|4|4|3	2.67	0.57	0.315782	0	0.71	0.157891	FALSE
SARS2_nsp2_D23Y_R27C	RPS11	P62280	10|12|10	8|11|10|9|8|9|6|9|8|2|4|9|9|9|12|12|8	10.67	1.27	0.334005	0	0.68	0.167002	FALSE
SARS2_nsp2_D23Y_R27C	SNRPE	P62304	1|1|0	0|1|1|2|0|0|0|0|0|0|0|2|1|1|1|1|1	0.67	1.03	0.223794	0	0.71	0.111897	FALSE
SARS2_nsp2_D23Y_R27C	SNRPF	P62306	1|1|1	1|1|1|2|0|0|0|1|1|1|0|1|1|0|2|1|1	1	1.21	0.332136	0	0.71	0.166068	FALSE
SARS2_nsp2_D23Y_R27C	SNRPD1	P62314	1|1|1	0|0|1|2|0|0|0|0|0|0|0|2|2|1|1|0|0	1	1.89	0.411322	0	0.71	0.205661	FALSE
SARS2_nsp2_D23Y_R27C	SNRPD2	P62316	2|1|1	1|2|3|2|1|0|0|0|0|0|1|3|4|3|2|3|1	1.33	0.87	0.346756	0.01	0.57	0.178378	FALSE
SARS2_nsp2_D23Y_R27C	SNRPD3	P62318	1|0|1	1|1|1|2|1|1|1|1|1|1|1|1|1|1|2|1|1	0.67	0.6	0.217663	0	0.71	0.108831	FALSE
SARS2_nsp2_D23Y_R27C	RPL7A	P62424	0|0|3	0|7|4|5|0|0|0|0|4|0|0|0|0|0|4|0|0	1	0.71	0.00975337	0.08	0.47	0.0448767	FALSE
SARS2_nsp2_D23Y_R27C	CNBP	P62633	12|11|10	12|7|15|12|8|7|6|8|10|0|0|12|16|8|9|10|11	11	1.24	0.334028	0	0.69	0.167014	FALSE
SARS2_nsp2_D23Y_R27C	RPS4X	P62701	6|7|9	9|11|11|11|14|7|10|13|12|5|7|11|10|8|10|10|7	7.33	0.75	0.317795	0	0.71	0.158897	FALSE
SARS2_nsp2_D23Y_R27C	RPL23A	P62750	6|5|5	9|7|11|12|13|6|5|10|14|7|6|8|11|10|11|10|8	5.33	0.57	0.322651	0	0.71	0.161325	FALSE
SARS2_nsp2_D23Y_R27C	RPS6	P62753	6|3|3	4|5|4|6|4|2|3|1|3|2|2|5|2|3|4|2|3	4	1.24	0.326739	0.01	0.58	0.16837	FALSE
SARS2_nsp2_D23Y_R27C	H4C9	P62805	4|1|9	7|16|17|11|1|3|6|0|12|1|2|2|4|2|15|4|2	4.67	0.76	0.246127	0	0.66	0.123064	FALSE
SARS2_nsp2_D23Y_R27C	RAN	P62826	8|5|4	1|5|4|5|2|1|1|1|4|3|3|6|4|3|6|3|4	5.67	1.72	0.347861	0.07	0.48	0.208931	FALSE
SARS2_nsp2_D23Y_R27C	RPL23	P62829	7|9|9	8|10|10|6|11|5|6|11|10|6|6|10|10|8|9|7|7	8.33	1.01	0.323992	0	0.69	0.161996	FALSE
SARS2_nsp2_D23Y_R27C	RPS15	P62841	1|1|0	4|3|4|2|4|2|1|2|2|1|4|3|3|3|3|1|0	0.67	0.27	0.19865	0	0.71	0.0993251	FALSE
SARS2_nsp2_D23Y_R27C	RPS24	P62847	5|5|4	7|8|8|10|8|6|7|6|7|6|7|6|6|6|6|8|4	4.67	0.68	0.322462	0	0.71	0.161231	FALSE
SARS2_nsp2_D23Y_R27C	RPS25	P62851	7|8|6	9|2|8|8|5|6|2|5|6|7|5|6|6|6|8|6|6	7	1.18	0.327722	0	0.67	0.163861	FALSE
SARS2_nsp2_D23Y_R27C	RPS26	P62854	1|1|1	1|2|1|2|2|0|0|2|1|1|3|1|2|1|1|0|0	1	0.85	0.324135	0	0.71	0.162067	FALSE
SARS2_nsp2_D23Y_R27C	RPS28	P62857	4|5|5	5|2|3|3|3|3|1|3|5|5|3|5|5|4|5|3|5	4.67	1.26	0.337038	0	0.63	0.168519	FALSE
SARS2_nsp2_D23Y_R27C	FAU	P62861	5|3|3	4|5|4|4|4|3|4|1|3|5|5|5|4|5|4|4|5	3.67	0.9	0.323799	0	0.65	0.1619	FALSE
SARS2_nsp2_D23Y_R27C	RBX1	P62877	0|0|1	0|0|0|0|0|0|0|0|1|0|0|0|1|0|0|0|0	0.33	2.83	0.052893	0	0.71	0.0264465	FALSE
SARS2_nsp2_D23Y_R27C	RPL30	P62888	7|7|6	10|10|9|9|6|8|7|7|9|4|4|9|10|8|9|8|7	6.67	0.85	0.325276	0	0.71	0.162638	FALSE
SARS2_nsp2_D23Y_R27C	RPL31	P62899	5|4|3	7|5|7|5|7|6|6|5|6|3|5|4|7|5|5|6|4	4	0.73	0.32112	0	0.71	0.16056	FALSE
SARS2_nsp2_D23Y_R27C	RPL32	P62910	1|1|2	0|4|4|5|1|2|1|1|2|1|1|2|1|4|2|2|2	1.33	0.65	0.300783	0	0.71	0.150392	FALSE
SARS2_nsp2_D23Y_R27C	RPL11	P62913	9|11|4	10|11|12|10|8|4|6|9|9|4|6|8|10|6|8|8|6	8	1.01	0.309028	0	0.68	0.154514	FALSE
SARS2_nsp2_D23Y_R27C	RPL8	P62917	0|0|1	0|1|1|2|0|0|0|0|1|0|0|0|0|0|2|0|0	0.33	0.81	0.00504273	0	0.71	0.00252137	FALSE
SARS2_nsp2_D23Y_R27C	PPIA	P62937	10|8|11	9|11|10|9|10|6|7|9|10|7|8|10|12|11|12|12|12	9.67	1	0.330828	0	0.7	0.165414	FALSE
SARS2_nsp2_D23Y_R27C	FKBP1A	P62942	1|1|1	4|6|7|6|5|3|1|3|6|3|3|2|0|2|2|2|2	1	0.3	0.3152	0	0.71	0.1576	FALSE
SARS2_nsp2_D23Y_R27C	RPS27A	P62979	3|4|4	6|3|4|4|3|3|2|3|5|0|1|4|3|3|4|3|3	3.67	1.15	0.327115	0	0.63	0.163558	FALSE
SARS2_nsp2_D23Y_R27C	UBA52	P62987	2|2|1	4|3|3|4|4|3|4|4|4|0|0|2|2|2|2|2|2	1.67	0.63	0.30732	0	0.71	0.15366	FALSE
SARS2_nsp2_D23Y_R27C	GRB2	P62993	2|0|1	0|0|1|1|0|0|0|0|0|1|0|2|1|1|0|1|1	1	1.89	0.259818	0.16	0.4	0.209909	FALSE
SARS2_nsp2_D23Y_R27C	PPP3R1	P63098	1|0|1	0|1|0|0|1|0|0|0|0|0|0|1|0|1|1|2|0	0.67	1.62	0.250574	0	0.71	0.125287	FALSE
SARS2_nsp2_D23Y_R27C	YWHAZ	P63104	1|1|1	0|0|1|1|0|0|0|0|1|0|0|2|1|0|1|1|1	1	1.89	0.350096	0	0.71	0.175048	FALSE
SARS2_nsp2_D23Y_R27C	DYNLL1	P63167	1|0|1	1|1|1|1|1|2|1|0|1|0|0|1|1|2|1|1|3	0.67	0.63	0.209872	0	0.71	0.104936	FALSE
SARS2_nsp2_D23Y_R27C	RPL38	P63173	19|16|18	19|15|18|19|18|15|12|13|16|16|12|19|19|17|18|19|18	17.67	1.06	0.333892	0	0.71	0.166946	FALSE
SARS2_nsp2_D23Y_R27C	SKP1	P63208	0|1|0	2|1|1|1|1|0|0|1|0|0|2|2|3|2|2|1|0	0.33	0.3	0.0100462	0	0.71	0.0050231	FALSE
SARS2_nsp2_D23Y_R27C	RPS21	P63220	3|3|5	2|1|1|3|2|1|0|1|1|2|1|4|3|3|5|2|3	3.67	1.78	0.336408	0.09	0.46	0.213204	FALSE
SARS2_nsp2_D23Y_R27C	EIF5A	P63241	4|1|0	0|1|0|0|0|0|1|0|0|0|1|3|0|1|2|1|0	1.67	2.83	0.217136	0.3	0.3	0.258568	FALSE
SARS2_nsp2_D23Y_R27C	RACK1	P63244	4|4|5	6|2|5|7|0|0|0|0|1|4|2|8|7|2|7|4|4	4.33	1.25	0.342454	0	0.62	0.171227	FALSE
SARS2_nsp2_D23Y_R27C	ACTG1	P63261	1|1|1	1|1|0|0|1|0|0|0|1|0|0|1|1|1|0|0|0	1	2.43	0.355163	0	0.71	0.177581	FALSE
SARS2_nsp2_D23Y_R27C	UBE2L3	P68036	1|0|1	1|1|1|1|1|1|1|0|1|1|1|2|0|1|2|2|1	0.67	0.63	0.212156	0	0.71	0.106078	FALSE
SARS2_nsp2_D23Y_R27C	TUBB4B	P68371	1|1|1	1|0|1|1|1|0|0|1|0|0|0|1|1|0|1|1|1	1	1.7	0.338585	0	0.71	0.169292	FALSE
SARS2_nsp2_D23Y_R27C	RPP30	P78346	1|0|2	0|0|0|1|1|1|1|0|0|0|0|2|1|2|1|1|1	1	1.42	0.204434	0.11	0.44	0.157217	FALSE
SARS2_nsp2_D23Y_R27C	GTF2I	P78347	1|0|1	1|1|3|1|1|0|0|0|1|0|0|1|1|1|3|7|3	0.67	0.47	0.223363	0	0.71	0.111682	FALSE
SARS2_nsp2_D23Y_R27C	CCT2	P78371	17|16|16	0|1|1|2|1|0|0|1|1|0|1|11|9|6|10|11|6	16.33	4.55	0.404674	0.87	0.01	0.637337	FALSE
SARS2_nsp2_D23Y_R27C	PRKDC	P78527	2|2|6	0|0|3|2|0|0|0|1|0|0|0|7|3|7|6|10|9	3.33	1.18	0.266978	0.03	0.52	0.148489	FALSE
SARS2_nsp2_D23Y_R27C	NTHL1	P78549	1|0|1	2|3|3|3|3|1|0|0|3|2|1|1|2|2|1|2|3	0.67	0.35	0.204616	0	0.71	0.102308	FALSE
SARS2_nsp2_D23Y_R27C	MRPS21	P82921	1|0|2	1|0|1|1|1|1|0|1|1|0|2|2|2|0|1|1|1	1	1.06	0.207081	0.06	0.49	0.13354	FALSE
SARS2_nsp2_D23Y_R27C	SARNP	P82979	2|1|0	0|0|0|2|0|0|0|0|0|0|0|3|2|0|2|0|0	1	1.89	0.232532	0.17	0.39	0.201266	FALSE
SARS2_nsp2_D23Y_R27C	RPL24	P83731	2|3|3	3|2|4|7|4|3|4|5|6|4|3|5|5|5|5|5|5	2.67	0.6	0.314612	0	0.71	0.157306	FALSE
SARS2_nsp2_D23Y_R27C	RPL36A	P83881	2|0|1	2|3|2|2|1|2|3|1|2|2|3|1|2|0|2|1|2	1	0.55	0.196776	0	0.6	0.0983881	FALSE
SARS2_nsp2_D23Y_R27C	ERH	P84090	1|1|2	1|2|3|4|3|3|2|2|4|2|1|1|1|2|2|2|1	1.33	0.63	0.30538	0	0.71	0.15269	FALSE
SARS2_nsp2_D23Y_R27C	RPL19	P84098	1|1|1	1|7|4|5|1|0|2|2|5|3|5|2|1|1|2|2|1	1	0.39	0.316907	0	0.71	0.158454	FALSE
SARS2_nsp2_D23Y_R27C	SERF2	P84101	2|2|1	1|2|1|3|1|3|1|0|1|2|3|3|3|1|1|1|0	1.67	1.05	0.320491	0.02	0.55	0.170245	FALSE
SARS2_nsp2_D23Y_R27C	SRSF3	P84103	6|6|5	7|7|10|10|6|6|5|9|4|2|7|11|10|6|10|9|8	5.67	0.76	0.325322	0	0.71	0.162661	FALSE
SARS2_nsp2_D23Y_R27C	RBM3	P98179	0|0|1	0|1|2|0|0|0|0|0|0|0|0|0|0|0|0|0|0	0.33	1.89	0.112419	0	0.71	0.0562096	FALSE
SARS2_nsp2_D23Y_R27C	MPP1	Q00013	0|0|1	4|0|1|1|0|0|0|0|1|2|2|3|1|1|1|1|1	0.33	0.3	0.0254802	0	0.71	0.0127401	FALSE
SARS2_nsp2_D23Y_R27C	TFAM	Q00059	5|3|6	2|6|4|4|3|2|2|4|4|3|2|5|4|6|7|8|4	4.67	1.13	0.337718	0	0.64	0.168859	FALSE
SARS2_nsp2_D23Y_R27C	SLC25A3	Q00325	2|1|3	2|1|1|1|1|0|0|3|1|0|1|1|1|1|3|2|1	2	1.7	0.290693	0.12	0.43	0.205347	FALSE
SARS2_nsp2_D23Y_R27C	GTF2B	Q00403	1|1|1	0|0|0|0|0|0|0|0|0|0|0|2|1|0|0|0|0	1	5.67	0.732055	0	0.71	0.366028	FALSE
SARS2_nsp2_D23Y_R27C	FKBP3	Q00688	11|13|7	4|7|2|12|7|3|2|3|2|9|7|15|12|8|20|13|6	10.33	1.33	0.340037	0	0.67	0.170018	FALSE
SARS2_nsp2_D23Y_R27C	HNRNPU	Q00839	0|0|9	2|22|18|12|3|2|2|0|11|0|0|5|3|4|15|5|7	3	0.46	0.0180108	0	0.67	0.00900538	FALSE
SARS2_nsp2_D23Y_R27C	SET	Q01105	1|0|2	0|3|4|2|4|1|1|3|0|0|1|2|2|3|4|4|3	1	0.46	0.184665	0	0.71	0.0923325	FALSE
SARS2_nsp2_D23Y_R27C	SRSF2	Q01130	5|5|4	3|4|2|5|5|3|2|3|4|4|4|7|5|7|6|6|5	4.67	1.06	0.344042	0	0.66	0.172021	FALSE
SARS2_nsp2_D23Y_R27C	FABP5	Q01469	0|4|1	0|0|0|0|0|0|0|0|0|0|0|0|0|0|0|0|0	1.67	16.67	0.826177	0.33	0.18	0.578089	FALSE
SARS2_nsp2_D23Y_R27C	SLC7A5	Q01650	1|0|0	0|0|0|0|0|0|0|0|0|0|0|0|0|0|0|0|0	0.33	3.33	0.0140855	0	0.71	0.00704274	FALSE
SARS2_nsp2_D23Y_R27C	DR1	Q01658	1|1|0	0|0|0|0|0|0|0|0|0|0|0|0|0|0|1|0|0	0.67	6.67	0.63765	0	0.71	0.318825	FALSE
SARS2_nsp2_D23Y_R27C	EWSR1	Q01844	2|2|3	2|0|0|0|1|3|1|2|2|0|2|5|3|3|2|2|3	2.33	1.28	0.325617	0.02	0.55	0.172809	FALSE
SARS2_nsp2_D23Y_R27C	DSG1	Q02413	1|7|0	0|0|0|0|0|0|0|0|0|0|0|0|0|0|0|3|0	2.67	15.11	0.691547	0.33	0.19	0.510773	FALSE
SARS2_nsp2_D23Y_R27C	RPL18A	Q02543	0|0|1	1|3|3|4|0|1|1|0|1|0|1|2|0|0|2|1|0	0.33	0.28	0.00442959	0	0.71	0.0022148	FALSE
SARS2_nsp2_D23Y_R27C	RPL6	Q02878	0|0|2	0|5|2|4|0|0|0|0|3|0|0|0|0|0|0|0|0	0.67	0.81	0.00828605	0.12	0.43	0.064143	FALSE
SARS2_nsp2_D23Y_R27C	SLC25A11	Q02978	1|1|1	0|0|0|1|0|0|0|1|0|0|0|0|0|0|0|0|0	1	8.5	0.318537	0	0.71	0.159269	FALSE
SARS2_nsp2_D23Y_R27C	LMNB2	Q03252	13|15|16	0|1|1|1|0|0|0|0|1|0|0|0|0|0|0|0|0	14.67	62.33	0.625374	1	0	0.812687	TRUE
SARS2_nsp2_D23Y_R27C	SRSF11	Q05519	6|7|7	6|5|1|4|4|5|4|3|5|3|8|10|9|8|10|5|8	6.67	1.16	0.352257	0	0.67	0.176129	FALSE
SARS2_nsp2_D23Y_R27C	PTPN11	Q06124	0|1|0	2|0|1|1|0|0|0|1|2|2|2|1|2|1|1|3|1	0.33	0.28	0.021234	0	0.71	0.010617	FALSE
SARS2_nsp2_D23Y_R27C	PRDX1	Q06830	5|4|3	8|5|9|9|6|5|5|4|10|7|5|6|4|9|4|6|3	4	0.65	0.320833	0	0.71	0.160416	FALSE
SARS2_nsp2_D23Y_R27C	RPL18	Q07020	0|0|2	1|4|2|2|0|0|1|0|2|0|0|0|0|0|1|0|0	0.67	0.87	0.0110109	0.11	0.44	0.0605055	FALSE
SARS2_nsp2_D23Y_R27C	C1QBP	Q07021	3|1|2	0|1|1|2|1|0|2|1|0|0|1|3|4|2|3|5|3	2	1.17	0.31199	0.03	0.53	0.170995	FALSE
SARS2_nsp2_D23Y_R27C	CKAP4	Q07065	2|3|3	0|0|0|0|0|0|0|0|0|0|0|0|0|0|0|2|1	2.67	15.11	0.396842	0.93	0.01	0.663421	FALSE
SARS2_nsp2_D23Y_R27C	SRSF1	Q07955	8|4|5	1|4|5|15|3|2|0|1|5|3|1|6|5|2|6|6|5	5.67	1.38	0.352269	0.01	0.59	0.181135	FALSE
SARS2_nsp2_D23Y_R27C	PPP3CA	Q08209	4|3|5	2|2|0|0|0|3|0|0|1|2|2|4|5|2|3|6|2	4	2	0.401903	0.12	0.43	0.260952	FALSE
SARS2_nsp2_D23Y_R27C	DSC1	Q08554	0|1|1	0|0|0|0|0|0|0|0|0|0|0|0|0|0|0|1|0	0.67	6.67	0.766306	0	0.71	0.383153	FALSE
SARS2_nsp2_D23Y_R27C	NSUN2	Q08J23	3|0|0	0|0|0|0|0|0|0|0|0|0|0|9|1|0|8|0|0	1	0.94	0.179422	0.18	0.38	0.179711	FALSE
SARS2_nsp2_D23Y_R27C	RBBP4	Q09028	2|1|1	0|1|2|1|0|0|0|0|1|1|0|1|1|0|2|2|2	1.33	1.62	0.366863	0.08	0.46	0.223431	FALSE
SARS2_nsp2_D23Y_R27C	HSPA14	Q0VDF9	1|0|0	0|0|0|1|0|0|0|0|0|0|0|2|1|1|3|0|0	0.33	0.71	0.052206	0	0.71	0.026103	FALSE
SARS2_nsp2_D23Y_R27C	WASHC5	Q12768	4|4|4	0|0|0|0|0|0|0|0|0|0|0|0|0|0|0|0|0	4	40	0.993296	1	0	0.996648	TRUE
SARS2_nsp2_D23Y_R27C	CDC20	Q12834	0|0|1	3|1|2|0|0|1|0|1|1|1|0|0|0|0|2|0|0	0.33	0.47	0.0134911	0	0.71	0.00674553	FALSE
SARS2_nsp2_D23Y_R27C	ACACA	Q13085	29|23|24	146|147|50|45|48|92|104|34|143|88|105|138|136|138|45|56|54	25.33	0.27	0.317045	0	0.71	0.158523	FALSE
SARS2_nsp2_D23Y_R27C	IK	Q13123	2|0|0	0|0|0|1|0|0|0|0|0|0|0|3|1|0|4|2|0	0.67	1.03	0.175944	0.15	0.41	0.162972	FALSE
SARS2_nsp2_D23Y_R27C	CBX3	Q13185	1|1|1	0|2|1|7|0|0|0|0|0|0|0|3|1|0|3|0|0	1	1	0.378859	0	0.71	0.18943	FALSE
SARS2_nsp2_D23Y_R27C	PSMD2	Q13200	2|1|2	0|0|2|1|1|1|0|0|0|0|0|0|0|0|0|1|2	1.67	3.54	0.34838	0.35	0.17	0.34919	FALSE
SARS2_nsp2_D23Y_R27C	TRIM28	Q13263	8|4|5	0|1|0|0|0|0|0|0|1|0|0|1|2|0|2|1|1	5.67	10.7	0.433051	0.97	0	0.701526	FALSE
SARS2_nsp2_D23Y_R27C	EIF3I	Q13347	1|1|1	0|0|0|1|0|0|0|0|0|0|0|0|1|0|0|5|3	1	1.7	0.410569	0	0.71	0.205284	FALSE
SARS2_nsp2_D23Y_R27C	PPIG	Q13427	3|1|3	0|1|1|2|1|1|1|1|1|2|2|5|6|3|5|6|6	2.33	0.9	0.372823	0	0.61	0.186411	FALSE
SARS2_nsp2_D23Y_R27C	TCOF1	Q13428	2|1|1	2|3|4|5|4|5|6|4|9|6|8|6|5|0|6|5|4	1.33	0.28	0.306122	0	0.71	0.153061	FALSE
SARS2_nsp2_D23Y_R27C	SF3B2	Q13435	1|0|0	1|1|1|0|1|1|0|0|1|1|1|7|3|6|4|2|1	0.33	0.18	0.00895169	0	0.71	0.00447585	FALSE
SARS2_nsp2_D23Y_R27C	PDAP1	Q13442	5|6|6	5|6|4|8|6|5|1|2|4|6|4|7|8|6|7|5|4	5.67	1.09	0.332064	0	0.67	0.166032	FALSE
SARS2_nsp2_D23Y_R27C	PRPF4B	Q13523	2|0|2	2|1|0|2|0|1|1|1|1|2|2|3|2|3|3|2|1	1.33	0.84	0.22244	0.02	0.55	0.12122	FALSE
SARS2_nsp2_D23Y_R27C	PIN1	Q13526	3|2|2	3|4|4|2|3|3|3|1|4|4|4|2|2|2|3|2|3	2.33	0.81	0.330217	0	0.64	0.165108	FALSE
SARS2_nsp2_D23Y_R27C	EIF4EBP1	Q13541	3|2|2	3|2|2|3|3|2|1|1|2|0|0|3|3|2|1|1|3	2.33	1.24	0.346571	0.02	0.55	0.183285	FALSE
SARS2_nsp2_D23Y_R27C	ITPK1	Q13572	0|1|0	0|0|0|0|0|0|0|0|1|0|1|2|1|2|0|0|1	0.33	0.71	0.0352449	0	0.71	0.0176224	FALSE
SARS2_nsp2_D23Y_R27C	SNW1	Q13573	2|2|2	1|3|0|5|3|0|0|1|3|2|1|7|6|2|7|4|1	2	0.74	0.33106	0	0.71	0.16553	FALSE
SARS2_nsp2_D23Y_R27C	FHL1	Q13642	3|1|0	0|1|4|4|2|0|0|1|1|0|0|1|3|0|6|4|1	1.33	0.81	0.201053	0.03	0.52	0.115527	FALSE
SARS2_nsp2_D23Y_R27C	NCOA4	Q13772	1|1|0	0|0|0|0|0|0|0|0|0|0|0|0|0|0|0|0|0	0.67	6.67	0.879314	0	0.71	0.439657	FALSE
SARS2_nsp2_D23Y_R27C	BYSL	Q13895	0|0|1	0|0|0|1|1|0|0|0|0|0|1|1|1|0|1|0|0	0.33	0.94	0.0239136	0	0.71	0.0119568	FALSE
SARS2_nsp2_D23Y_R27C	CKAP5	Q14008	1|1|0	0|0|0|0|0|0|0|0|0|0|0|1|1|1|2|0|0	0.67	2.27	0.417971	0	0.71	0.208986	FALSE
SARS2_nsp2_D23Y_R27C	COX17	Q14061	2|2|2	5|2|5|4|5|1|3|3|5|2|3|2|2|1|2|3|2	2	0.68	0.323057	0	0.71	0.161529	FALSE
SARS2_nsp2_D23Y_R27C	HNRNPD	Q14103	2|1|3	1|4|8|7|1|0|1|0|4|0|1|0|1|0|6|1|0	2	0.97	0.313185	0.01	0.57	0.161593	FALSE
SARS2_nsp2_D23Y_R27C	VGLL4	Q14135	0|1|2	0|0|0|0|0|0|0|0|0|0|0|1|0|0|0|1|1	1	5.67	0.68221	0.29	0.31	0.486105	FALSE
SARS2_nsp2_D23Y_R27C	EIF3A	Q14152	3|1|2	0|0|0|0|0|0|0|0|0|0|0|2|0|1|2|5|4	2	2.43	0.518935	0.31	0.3	0.414467	FALSE
SARS2_nsp2_D23Y_R27C	ELOA	Q14241	1|1|0	1|0|0|0|1|0|0|0|0|0|0|0|0|0|1|2|2	0.67	1.62	0.269412	0	0.71	0.134706	FALSE
SARS2_nsp2_D23Y_R27C	CTTN	Q14247	3|4|3	4|3|5|1|0|2|0|0|3|3|3|8|4|2|3|4|3	3.33	1.18	0.350962	0	0.61	0.175481	FALSE
SARS2_nsp2_D23Y_R27C	RCN2	Q14257	1|0|1	0|0|0|0|0|0|0|1|1|0|0|0|1|0|0|2|1	0.67	1.89	0.199928	0	0.71	0.0999638	FALSE
SARS2_nsp2_D23Y_R27C	FAM50A	Q14320	2|0|0	0|0|0|3|0|0|0|0|0|0|0|2|1|0|4|0|0	0.67	1.13	0.0397849	0.17	0.4	0.104892	FALSE
SARS2_nsp2_D23Y_R27C	FRG1	Q14331	13|13|10	8|12|11|12|14|10|10|10|12|3|5|9|10|8|15|17|13	12	1.14	0.333968	0	0.7	0.166984	FALSE
SARS2_nsp2_D23Y_R27C	CAPRIN1	Q14444	3|6|5	1|1|0|1|2|2|0|0|2|0|1|2|3|0|2|3|2	4.67	3.61	0.393985	0.62	0.1	0.506993	FALSE
SARS2_nsp2_D23Y_R27C	RBM39	Q14498	21|20|19	25|25|23|25|27|23|25|24|24|15|23|22|29|23|28|27|31	20	0.81	0.328686	0	0.71	0.164343	FALSE
SARS2_nsp2_D23Y_R27C	PDIA5	Q14554	1|1|1	1|1|2|5|1|1|0|1|2|3|1|5|4|3|7|8|4	1	0.35	0.326342	0	0.71	0.163171	FALSE
SARS2_nsp2_D23Y_R27C	CLINT1	Q14677	4|2|5	0|1|0|0|0|1|0|1|0|1|0|6|5|5|1|3|3	3.67	2.31	0.375384	0.27	0.32	0.322692	FALSE
SARS2_nsp2_D23Y_R27C	MESD	Q14696	4|2|1	0|0|0|3|1|0|0|0|0|0|0|6|2|2|4|4|1	2.33	1.72	0.383805	0.17	0.39	0.276902	FALSE
SARS2_nsp2_D23Y_R27C	LBR	Q14739	2|1|2	0|0|0|0|0|0|0|0|0|0|0|0|0|0|0|0|0	1.67	16.67	0.399143	0.64	0.08	0.519571	FALSE
SARS2_nsp2_D23Y_R27C	KIF22	Q14807	0|0|2	6|4|4|3|4|4|3|3|4|3|4|0|3|1|5|2|2	0.67	0.21	0.00948976	0	0.71	0.00474488	FALSE
SARS2_nsp2_D23Y_R27C	DRAP1	Q14919	1|0|0	0|0|0|1|0|0|0|0|0|0|0|1|1|0|2|0|0	0.33	1.13	0.0684795	0	0.71	0.0342397	FALSE
SARS2_nsp2_D23Y_R27C	KPNB1	Q14974	0|0|1	0|0|0|0|0|0|0|0|0|0|0|1|0|0|1|0|1	0.33	1.89	0.00982034	0	0.71	0.00491017	FALSE
SARS2_nsp2_D23Y_R27C	NOLC1	Q14978	3|7|3	7|7|8|9|6|5|5|5|7|5|8|5|10|0|8|3|3	4.33	0.73	0.297096	0	0.68	0.148548	FALSE
SARS2_nsp2_D23Y_R27C	ARHGAP19	Q14CB8	0|1|1	0|0|0|1|0|0|0|0|0|0|0|0|1|0|0|0|0	0.67	5.67	0.443438	0	0.71	0.221719	FALSE
SARS2_nsp2_D23Y_R27C	SEPTIN2	Q15019	2|3|1	0|0|0|0|0|0|0|0|0|0|0|2|2|1|0|2|1	2	4.25	0.756515	0.44	0.14	0.598257	FALSE
SARS2_nsp2_D23Y_R27C	EFTUD2	Q15029	0|0|1	0|0|0|0|0|0|0|0|0|0|0|0|0|1|0|0|0	0.33	3.33	0.0548426	0	0.71	0.0274213	FALSE
SARS2_nsp2_D23Y_R27C	EIF4H	Q15056	1|1|1	0|0|0|0|0|1|0|0|0|0|0|2|1|1|1|0|0	1	2.83	0.375882	0	0.71	0.187941	FALSE
SARS2_nsp2_D23Y_R27C	PDIA6	Q15084	3|1|2	7|6|7|6|7|3|4|4|2|4|5|3|4|3|5|4|5	2	0.43	0.30355	0	0.71	0.151775	FALSE
SARS2_nsp2_D23Y_R27C	PPA1	Q15181	2|1|2	1|1|0|1|2|1|2|1|1|0|0|0|1|1|3|2|2	1.67	1.49	0.357699	0.07	0.47	0.21385	FALSE
SARS2_nsp2_D23Y_R27C	NONO	Q15233	8|6|7	4|5|9|7|2|1|2|1|4|5|6|8|5|5|11|6|5	7	1.38	0.348011	0	0.64	0.174006	FALSE
SARS2_nsp2_D23Y_R27C	RNPS1	Q15287	0|0|1	0|1|2|2|0|0|0|0|1|0|0|0|0|0|1|0|0	0.33	0.81	0.0350756	0	0.71	0.0175378	FALSE
SARS2_nsp2_D23Y_R27C	PCBP1	Q15365	10|10|15	13|13|10|12|13|10|11|11|9|9|5|15|12|15|15|12|14	11.67	1	0.325591	0	0.7	0.162796	FALSE
SARS2_nsp2_D23Y_R27C	PCBP2	Q15366	6|5|4	6|7|7|7|6|5|6|4|7|3|6|8|4|7|8|9|8	5	0.79	0.324955	0	0.71	0.162477	FALSE
SARS2_nsp2_D23Y_R27C	TOMM20	Q15388	1|0|0	0|0|0|1|0|0|0|0|0|0|0|0|0|0|0|0|0	0.33	3.33	0.0475327	0	0.71	0.0237664	FALSE
SARS2_nsp2_D23Y_R27C	SF3B3	Q15393	1|1|1	2|1|3|2|1|2|1|0|3|0|4|6|6|7|4|6|5	1	0.32	0.324048	0	0.71	0.162024	FALSE
SARS2_nsp2_D23Y_R27C	CNN3	Q15417	1|1|3	6|2|4|4|4|3|2|4|5|3|3|4|4|2|4|2|3	1.67	0.48	0.274105	0	0.71	0.137052	FALSE
SARS2_nsp2_D23Y_R27C	SAFB	Q15424	0|0|2	0|3|3|1|0|0|0|0|1|0|0|0|0|0|1|0|0	0.67	1.26	0.0501873	0.17	0.39	0.110094	FALSE
SARS2_nsp2_D23Y_R27C	CDSN	Q15517	0|1|0	0|0|0|0|0|0|0|0|0|0|0|0|0|0|0|0|0	0.33	3.33	0.68551	0	0.71	0.342755	FALSE
SARS2_nsp2_D23Y_R27C	MAPRE2	Q15555	1|0|0	0|0|0|0|0|0|0|0|0|0|0|1|0|0|0|0|0	0.33	3.33	0.539272	0	0.71	0.269636	FALSE
SARS2_nsp2_D23Y_R27C	SF1	Q15637	16|16|13	11|9|6|7|13|8|5|7|15|7|7|21|19|11|16|20|16	15	1.29	0.344624	0	0.7	0.172312	FALSE
SARS2_nsp2_D23Y_R27C	SLC1A5	Q15758	1|0|0	0|0|0|0|0|0|0|0|0|0|0|0|0|0|0|0|0	0.33	3.33	0.00527543	0	0.71	0.00263772	FALSE
SARS2_nsp2_D23Y_R27C	TOMM34	Q15785	3|2|0	0|0|0|1|0|0|0|0|0|1|0|8|3|0|6|0|0	1.67	1.49	0.291978	0.22	0.36	0.255989	FALSE
SARS2_nsp2_D23Y_R27C	SEPTIN7	Q16181	4|1|1	0|0|0|0|0|0|0|0|0|0|0|0|2|0|1|2|2	2	4.86	0.724053	0.31	0.3	0.517027	FALSE
SARS2_nsp2_D23Y_R27C	CSRP2	Q16527	10|9|7	9|10|11|11|8|9|5|9|13|2|2|9|12|12|10|10|14	8.67	0.94	0.330815	0	0.7	0.165408	FALSE
SARS2_nsp2_D23Y_R27C	SRSF7	Q16629	3|2|3	1|3|2|2|1|0|0|0|1|0|0|3|2|1|2|2|1	2.67	2.16	0.386833	0.19	0.38	0.288416	FALSE
SARS2_nsp2_D23Y_R27C	CPSF6	Q16630	7|4|6	5|5|3|6|2|4|0|3|1|4|4|10|12|6|9|7|7	5.67	1.09	0.337566	0	0.66	0.168783	FALSE
SARS2_nsp2_D23Y_R27C	UBE2S	Q16763	3|1|2	0|0|0|0|0|0|0|0|0|0|0|6|0|0|2|0|0	2	4.25	0.437908	0.49	0.13	0.463954	FALSE
SARS2_nsp2_D23Y_R27C	HAGH	Q16775	1|0|1	0|0|1|0|1|0|1|0|0|2|0|2|1|0|1|1|1	0.67	1.03	0.247647	0	0.71	0.123823	FALSE
SARS2_nsp2_D23Y_R27C	IMMT	Q16891	1|0|0	0|0|0|0|0|0|0|0|0|0|0|0|0|0|0|0|0	0.33	3.33	0.00182541	0	0.71	0.000912707	FALSE
SARS2_nsp2_D23Y_R27C	WASHC4	Q2M389	6|3|6	0|0|0|0|0|0|0|0|0|0|0|0|0|0|0|0|0	5	50	0.983311	1	0	0.991655	TRUE
SARS2_nsp2_D23Y_R27C	TSR1	Q2NL82	3|3|3	0|0|0|2|0|0|0|0|0|0|0|8|5|2|6|5|2	3	1.7	0.414304	0.09	0.46	0.252152	FALSE
SARS2_nsp2_D23Y_R27C	SMU1	Q2TAY7	2|0|0	0|0|0|2|0|0|0|0|0|0|0|3|2|1|6|1|0	0.67	0.76	0.0573663	0.1	0.44	0.0786832	FALSE
SARS2_nsp2_D23Y_R27C	CWF19L2	Q2TBE0	1|0|1	0|2|1|3|2|1|0|1|1|4|3|4|3|4|2|3|5	0.67	0.29	0.211593	0	0.71	0.105796	FALSE
SARS2_nsp2_D23Y_R27C	TWISTNB	Q3B726	2|0|0	0|0|1|2|1|1|0|1|2|0|2|1|3|1|3|3|1	0.67	0.52	0.0142416	0.02	0.54	0.0171208	FALSE
SARS2_nsp2_D23Y_R27C	MAP7D1	Q3KQU3	1|1|1	0|0|0|1|0|0|0|0|0|0|0|0|0|0|0|0|0	1	10	0.365797	0	0.71	0.182898	FALSE
SARS2_nsp2_D23Y_R27C	CHD9	Q3L8U1	0|0|1	0|0|0|0|0|0|0|0|0|0|0|1|0|1|1|1|1	0.33	1.13	0.251453	0	0.71	0.125727	FALSE
SARS2_nsp2_D23Y_R27C	LSM12	Q3MHD2	1|1|0	1|0|1|1|1|1|0|1|1|0|1|1|1|1|1|1|0	0.67	0.87	0.212906	0	0.71	0.106453	FALSE
SARS2_nsp2_D23Y_R27C	TUBB8	Q3ZCM7	1|3|1	1|1|2|2|3|0|0|0|2|0|0|3|3|1|2|2|2	1.67	1.18	0.275465	0.05	0.5	0.162733	FALSE
SARS2_nsp2_D23Y_R27C	TIMM50	Q3ZCQ8	0|1|0	0|0|0|0|0|0|0|1|0|1|0|0|0|0|2|1|2	0.33	0.81	0.00271196	0	0.71	0.00135598	FALSE
SARS2_nsp2_D23Y_R27C	AMOT	Q4VCS5	2|3|2	0|0|0|0|0|0|0|0|0|0|0|0|2|1|1|3|2	2.33	4.41	0.375124	0.57	0.11	0.472562	FALSE
SARS2_nsp2_D23Y_R27C	TMEM128	Q5BJH2	1|0|1	0|0|0|0|0|0|0|0|0|0|0|0|0|0|0|0|0	0.67	6.67	0.879293	0	0.71	0.439646	FALSE
SARS2_nsp2_D23Y_R27C	FAM133B	Q5BKY9	4|2|1	1|5|4|5|6|4|6|6|2|0|4|4|4|3|5|6|4	2.33	0.57	0.294107	0	0.71	0.147053	FALSE
SARS2_nsp2_D23Y_R27C	FAM76B	Q5HYJ3	2|1|0	1|1|2|1|2|1|0|2|3|1|0|2|1|1|0|2|0	1	0.85	0.206762	0.03	0.52	0.118381	FALSE
SARS2_nsp2_D23Y_R27C	PRRC2B	Q5JSZ5	0|1|0	0|0|0|0|1|0|0|1|0|0|1|4|2|1|0|2|0	0.33	0.47	0.0134098	0	0.71	0.00670491	FALSE
SARS2_nsp2_D23Y_R27C	FKBP15	Q5T1M5	32|36|26	0|0|0|0|0|0|0|0|0|0|0|0|0|0|0|0|0	31.33	313.33	0.991062	1	0	0.995531	TRUE
SARS2_nsp2_D23Y_R27C	IBA57	Q5T440	4|2|2	10|7|4|5|4|4|2|3|5|5|6|3|4|4|5|8|7	2.67	0.53	0.311705	0	0.71	0.155853	FALSE
SARS2_nsp2_D23Y_R27C	KPRP	Q5T749	0|3|0	0|0|0|0|0|0|0|0|0|0|0|0|0|0|0|5|1	1	2.83	0.305313	0.29	0.31	0.297656	FALSE
SARS2_nsp2_D23Y_R27C	RBM26	Q5T8P6	1|1|0	0|0|0|0|0|0|0|0|0|0|0|3|0|0|2|0|0	0.67	2.27	0.409066	0	0.71	0.204533	FALSE
SARS2_nsp2_D23Y_R27C	ATAD3B	Q5T9A4	1|0|0	0|0|0|0|0|0|0|0|0|0|0|0|0|0|0|0|0	0.33	3.33	0.00246797	0	0.71	0.00123399	FALSE
SARS2_nsp2_D23Y_R27C	PRPF38B	Q5VTL8	13|10|10	10|11|10|12|13|12|11|12|13|4|10|19|16|12|13|14|11	11	0.92	0.331463	0	0.7	0.165732	FALSE
SARS2_nsp2_D23Y_R27C	SPRYD7	Q5W111	0|0|1	0|0|0|0|0|0|0|0|0|0|0|0|2|0|0|0|0	0.33	2.83	0.45617	0	0.71	0.228085	FALSE
SARS2_nsp2_D23Y_R27C	WASHC2A	Q641Q2	1|0|2	0|0|0|0|0|0|0|0|0|0|0|0|0|0|0|0|0	1	10	0.85684	0.32	0.22	0.58842	FALSE
SARS2_nsp2_D23Y_R27C	ARL6IP4	Q66PJ3	8|5|10	2|3|9|5|4|4|2|2|4|2|2|8|10|8|9|7|10	7.67	1.43	0.35411	0	0.62	0.177055	FALSE
SARS2_nsp2_D23Y_R27C	RPL7L1	Q6DKI1	0|0|1	0|0|0|0|0|0|0|0|0|0|0|0|0|0|0|0|0	0.33	3.33	0.198259	0	0.71	0.0991294	FALSE
SARS2_nsp2_D23Y_R27C	CIAPIN1	Q6FI81	3|1|3	2|1|2|3|0|1|1|2|1|2|1|5|4|4|1|2|3	2.33	1.13	0.327765	0.01	0.56	0.168883	FALSE
SARS2_nsp2_D23Y_R27C	SDE2	Q6IQ49	1|1|0	2|1|2|1|0|1|1|0|3|2|1|3|3|2|2|0|0	0.67	0.47	0.21067	0	0.71	0.105335	FALSE
SARS2_nsp2_D23Y_R27C	NIPBL	Q6KC79	2|1|2	2|0|0|0|0|0|0|0|1|0|1|2|4|1|0|1|0	1.67	2.36	0.36747	0.25	0.34	0.308735	FALSE
SARS2_nsp2_D23Y_R27C	RPUSD3	Q6P087	2|0|1	2|1|7|4|2|1|2|2|6|3|1|0|0|1|1|1|1	1	0.49	0.193403	0	0.71	0.0967017	FALSE
SARS2_nsp2_D23Y_R27C	MRPL54	Q6P161	1|0|0	0|0|0|0|0|0|0|0|0|0|0|1|0|0|1|1|0	0.33	1.89	0.0497795	0	0.71	0.0248898	FALSE
SARS2_nsp2_D23Y_R27C	MRPL14	Q6P1L8	6|5|5	5|5|7|5|6|6|6|6|6|7|5|6|7|3|4|5|6	5.33	0.95	0.332273	0	0.68	0.166137	FALSE
SARS2_nsp2_D23Y_R27C	METTL2B	Q6P1Q9	0|0|1	0|0|1|0|0|0|0|0|0|0|0|1|1|0|0|0|0	0.33	1.89	0.0507833	0	0.71	0.0253916	FALSE
SARS2_nsp2_D23Y_R27C	TAF2	Q6P1X5	1|0|1	1|0|0|0|2|1|0|0|0|2|1|0|1|1|1|1|1	0.67	0.94	0.221975	0	0.71	0.110987	FALSE
SARS2_nsp2_D23Y_R27C	PRPF8	Q6P2Q9	1|1|2	0|0|1|0|0|0|0|0|0|0|0|3|1|1|2|1|1	1.33	2.27	0.356349	0.14	0.41	0.248174	FALSE
SARS2_nsp2_D23Y_R27C	FAHD1	Q6P587	2|0|0	1|0|1|1|2|0|1|0|2|2|4|1|1|1|0|0|0	0.67	0.67	0.0221136	0.05	0.5	0.0360568	FALSE
SARS2_nsp2_D23Y_R27C	RPL22L1	Q6P5R6	3|4|2	4|3|2|2|4|2|1|3|3|2|2|4|4|2|3|2|3	3	1.11	0.324247	0	0.61	0.162124	FALSE
SARS2_nsp2_D23Y_R27C	ALKBH5	Q6P6C2	0|0|1	1|0|0|0|0|0|0|0|0|1|1|4|1|0|1|0|0	0.33	0.63	0.02455	0	0.71	0.012275	FALSE
SARS2_nsp2_D23Y_R27C	MTHFD1L	Q6UB35	0|0|1	2|0|1|0|0|0|0|1|1|0|0|0|3|0|1|0|0	0.33	0.63	0.0148899	0	0.71	0.00744494	FALSE
SARS2_nsp2_D23Y_R27C	FIP1L1	Q6UN15	0|1|0	1|1|1|1|0|1|0|0|0|1|1|0|1|0|1|0|0	0.33	0.63	0.0261735	0	0.71	0.0130867	FALSE
SARS2_nsp2_D23Y_R27C	SBSN	Q6UWP8	0|1|0	0|0|0|0|0|0|0|0|0|0|0|0|0|0|0|0|0	0.33	3.33	0.164686	0	0.71	0.082343	FALSE
SARS2_nsp2_D23Y_R27C	GIGYF2	Q6Y7W6	44|26|28	0|0|0|0|0|0|0|0|0|0|0|0|0|0|0|0|0	32.67	326.67	0.742268	1	0	0.871134	TRUE
SARS2_nsp2_D23Y_R27C	NKAPD1	Q6ZUT1	4|4|4	3|4|2|3|1|0|2|3|4|2|4|5|6|3|6|7|4	4	1.15	0.370544	0	0.63	0.185272	FALSE
SARS2_nsp2_D23Y_R27C	FRA10AC1	Q70Z53	5|4|6	3|1|2|5|4|3|1|2|3|1|2|8|5|5|4|4|3	5	1.52	0.354492	0.01	0.58	0.182246	FALSE
SARS2_nsp2_D23Y_R27C	RPS27L	Q71UM5	2|1|0	1|2|3|2|3|2|1|1|3|0|0|0|0|2|1|2|1	1	0.71	0.196675	0.01	0.56	0.103337	FALSE
SARS2_nsp2_D23Y_R27C	DDX46	Q7L014	29|27|22	14|16|20|25|21|14|9|20|19|14|13|38|35|34|29|32|29	26	1.16	0.350215	0	0.71	0.175107	FALSE
SARS2_nsp2_D23Y_R27C	PARS2	Q7L3T8	3|1|2	1|1|4|2|0|0|0|2|0|1|1|1|1|0|3|2|0	2	1.79	0.374537	0.14	0.42	0.257268	FALSE
SARS2_nsp2_D23Y_R27C	RSRC2	Q7L4I2	8|9|8	4|4|6|6|5|4|4|4|5|3|6|9|10|7|8|9|8	8.33	1.39	0.352337	0	0.66	0.176168	FALSE
SARS2_nsp2_D23Y_R27C	PHF5A	Q7RTV0	0|1|2	0|0|1|1|0|0|0|0|0|0|0|4|2|2|1|2|2	1	1.13	0.272266	0.08	0.47	0.176133	FALSE
SARS2_nsp2_D23Y_R27C	NUFIP2	Q7Z417	2|2|4	2|1|1|0|1|0|2|1|1|2|1|2|3|0|1|1|1	2.67	2.27	0.351848	0.25	0.33	0.300924	FALSE
SARS2_nsp2_D23Y_R27C	IRF2BP2	Q7Z5L9	15|12|16	7|8|6|4|2|6|7|7|12|6|5|19|16|12|15|22|17	14.33	1.42	0.354814	0	0.69	0.177407	FALSE
SARS2_nsp2_D23Y_R27C	HUWE1	Q7Z6Z7	0|1|0	0|0|0|0|0|0|0|0|0|0|0|0|0|0|0|0|0	0.33	3.33	0.68551	0	0.71	0.342755	FALSE
SARS2_nsp2_D23Y_R27C	YTHDF3	Q7Z739	0|1|1	0|0|0|0|0|0|0|0|1|0|0|1|2|1|0|0|0	0.67	2.27	0.440794	0	0.71	0.220397	FALSE
SARS2_nsp2_D23Y_R27C	CMC1	Q7Z7K0	3|4|3	4|1|1|0|1|3|2|0|2|2|1|3|4|1|3|2|2	3.33	1.77	0.356074	0.06	0.48	0.208037	FALSE
SARS2_nsp2_D23Y_R27C	GLRX5	Q86SX6	1|1|0	1|0|2|2|0|0|0|0|0|0|1|2|0|1|2|1|1	0.67	0.87	0.234031	0	0.71	0.117016	FALSE
SARS2_nsp2_D23Y_R27C	SETD3	Q86TU7	1|0|0	0|0|0|0|0|0|0|0|0|0|0|2|0|0|0|0|0	0.33	2.83	0.444456	0	0.71	0.222228	FALSE
SARS2_nsp2_D23Y_R27C	ISCA2	Q86U28	1|1|1	3|0|0|0|0|0|0|0|1|2|1|1|2|1|1|1|1	1	1.21	0.378492	0	0.71	0.189246	FALSE
SARS2_nsp2_D23Y_R27C	YRDC	Q86U90	1|1|1	4|3|5|5|3|0|0|1|5|1|1|4|0|3|4|5|5	1	0.35	0.319454	0	0.71	0.159727	FALSE
SARS2_nsp2_D23Y_R27C	MTDH	Q86UE4	1|0|0	0|0|0|0|0|1|0|0|0|0|0|2|1|0|1|0|0	0.33	1.13	0.0430993	0	0.71	0.0215496	FALSE
SARS2_nsp2_D23Y_R27C	ZNF598	Q86UK7	22|13|19	2|0|0|1|0|0|0|0|0|1|0|3|3|5|0|1|1	18	18	0.611886	1	0	0.805943	TRUE
SARS2_nsp2_D23Y_R27C	RPS19BP1	Q86WX3	1|1|1	2|0|1|2|0|2|3|2|0|2|1|3|1|2|1|2|1	1	0.68	0.323972	0	0.71	0.161986	FALSE
SARS2_nsp2_D23Y_R27C	CARM1	Q86X55	1|1|1	0|0|0|0|0|0|0|0|0|0|0|0|0|1|0|1|0	1	8.5	0.855154	0	0.71	0.427577	FALSE
SARS2_nsp2_D23Y_R27C	PTRH1	Q86Y79	0|0|1	3|2|0|1|2|0|0|0|0|1|1|0|0|1|0|1|1	0.33	0.44	0.00798314	0	0.71	0.00399157	FALSE
SARS2_nsp2_D23Y_R27C	VRK3	Q8IV63	2|4|2	0|0|0|0|0|0|0|0|0|0|0|0|0|0|0|0|0	2.67	26.67	0.973284	0.97	0	0.971642	TRUE
SARS2_nsp2_D23Y_R27C	CCDC50	Q8IVM0	0|1|0	0|0|0|0|0|0|0|0|0|0|0|1|0|0|0|0|0	0.33	3.33	0.556473	0	0.71	0.278237	FALSE
SARS2_nsp2_D23Y_R27C	BRSK2	Q8IWQ3	2|3|4	1|3|2|1|2|2|3|1|3|2|2|4|4|3|5|3|3	3	1.16	0.345801	0	0.59	0.1729	FALSE
SARS2_nsp2_D23Y_R27C	PHF6	Q8IWS0	20|18|16	14|16|20|22|22|16|10|18|14|9|5|25|22|19|24|23|24	18	1.01	0.331619	0	0.71	0.165809	FALSE
SARS2_nsp2_D23Y_R27C	CHERP	Q8IWX8	12|13|12	22|20|10|9|12|8|13|9|20|11|10|25|27|24|21|26|13	12.33	0.75	0.330738	0	0.71	0.165369	FALSE
SARS2_nsp2_D23Y_R27C	DNAJC10	Q8IXB1	7|4|6	13|12|14|19|12|9|8|6|15|10|10|10|12|13|14|12|14	5.67	0.47	0.318373	0	0.71	0.159186	FALSE
SARS2_nsp2_D23Y_R27C	RAVER1	Q8IY67	7|4|4	3|3|2|1|1|3|2|2|4|0|0|10|9|9|2|7|5	5	1.35	0.354072	0.01	0.59	0.182036	FALSE
SARS2_nsp2_D23Y_R27C	SRRM1	Q8IYB3	0|1|1	1|1|2|4|2|1|0|0|1|0|3|3|5|2|5|3|2	0.67	0.32	0.205188	0	0.71	0.102594	FALSE
SARS2_nsp2_D23Y_R27C	SMAP1	Q8IYB5	1|1|1	1|1|4|4|1|1|1|1|1|1|1|2|2|2|2|2|2	1	0.59	0.330286	0	0.71	0.165143	FALSE
SARS2_nsp2_D23Y_R27C	TCEAL8	Q8IYN2	0|0|1	0|0|0|0|0|0|0|1|1|0|0|1|1|0|0|0|0	0.33	1.42	0.0563425	0	0.71	0.0281713	FALSE
SARS2_nsp2_D23Y_R27C	KATNAL2	Q8IYT4	1|1|0	0|0|0|0|0|0|0|0|0|0|0|0|0|0|0|0|0	0.67	6.67	0.879314	0	0.71	0.439657	FALSE
SARS2_nsp2_D23Y_R27C	SELENOH	Q8IZQ5	1|1|0	3|2|3|4|4|0|3|1|1|4|2|1|2|2|1|1|1	0.67	0.32	0.202712	0	0.71	0.101356	FALSE
SARS2_nsp2_D23Y_R27C	RBIS	Q8N0T1	1|1|0	0|1|0|1|1|0|0|0|0|0|0|1|1|0|1|1|2	0.67	1.26	0.219406	0	0.71	0.109703	FALSE
SARS2_nsp2_D23Y_R27C	CCAR2	Q8N163	1|0|0	0|0|0|0|1|0|1|0|0|0|0|0|1|0|0|0|1	0.33	1.42	0.0338695	0	0.71	0.0169347	FALSE
SARS2_nsp2_D23Y_R27C	NUP93	Q8N1F7	0|0|1	0|0|0|1|0|0|0|0|0|0|0|1|1|0|1|1|1	0.33	0.94	0.00257317	0	0.71	0.00128658	FALSE
SARS2_nsp2_D23Y_R27C	LRRC47	Q8N1G4	18|15|12	10|6|5|12|8|10|0|2|6|8|6|23|19|12|22|20|15	15	1.39	0.356327	0	0.69	0.178164	FALSE
SARS2_nsp2_D23Y_R27C	NKAP	Q8N5F7	5|5|4	2|3|2|5|3|3|3|4|4|1|3|5|5|7|8|7|6	4.67	1.12	0.349541	0	0.65	0.17477	FALSE
SARS2_nsp2_D23Y_R27C	CPSF7	Q8N684	2|1|1	2|3|0|3|2|2|0|1|1|2|2|6|4|2|7|3|2	1.33	0.54	0.323867	0	0.71	0.161933	FALSE
SARS2_nsp2_D23Y_R27C	OTUD6B	Q8N6M0	1|0|0	0|0|0|0|0|0|0|0|0|0|0|1|1|0|2|0|0	0.33	1.42	0.219477	0	0.71	0.109739	FALSE
SARS2_nsp2_D23Y_R27C	EIF1AD	Q8N9N8	1|2|0	0|0|0|0|0|0|0|0|0|0|0|1|1|0|1|0|0	1	5.67	0.356017	0.29	0.31	0.323008	FALSE
SARS2_nsp2_D23Y_R27C	SREK1IP1	Q8N9Q2	11|8|9	7|11|10|13|9|10|10|11|10|2|4|8|10|8|10|12|12	9.33	1.01	0.327302	0	0.7	0.163651	FALSE
SARS2_nsp2_D23Y_R27C	PRPF38A	Q8NAV1	5|5|3	3|3|1|4|3|3|3|2|4|1|2|6|5|3|6|6|3	4.33	1.27	0.340892	0	0.62	0.170446	FALSE
SARS2_nsp2_D23Y_R27C	TXNDC5	Q8NBS9	3|2|3	9|3|8|5|5|5|1|5|7|2|2|5|5|4|5|6|5	2.67	0.55	0.321455	0	0.71	0.160728	FALSE
SARS2_nsp2_D23Y_R27C	SERBP1	Q8NC51	12|6|6	11|9|11|10|4|5|5|6|5|6|8|11|9|8|13|5|7	8	1.02	0.320782	0	0.68	0.160391	FALSE
SARS2_nsp2_D23Y_R27C	LEMD2	Q8NC56	5|1|6	0|0|0|0|0|0|0|0|0|0|0|0|0|0|0|0|0	4	40	0.793785	0.67	0.03	0.731893	TRUE
SARS2_nsp2_D23Y_R27C	LSM14A	Q8ND56	1|1|0	2|2|3|1|3|1|2|1|0|0|0|2|2|1|1|0|2	0.67	0.49	0.205087	0	0.71	0.102543	FALSE
SARS2_nsp2_D23Y_R27C	MAPK1IP1L	Q8NDC0	1|1|1	1|0|0|0|1|0|0|0|1|0|0|1|0|1|1|1|1	1	2.12	0.406939	0	0.71	0.20347	FALSE
SARS2_nsp2_D23Y_R27C	C1orf131	Q8NDD1	2|0|1	2|5|4|4|1|1|2|2|1|2|1|0|1|1|3|0|0	1	0.57	0.199669	0	0.6	0.0998346	FALSE
SARS2_nsp2_D23Y_R27C	ABCF1	Q8NE71	22|19|15	17|15|13|16|15|14|9|9|14|9|12|22|15|17|24|22|21	18.67	1.2	0.346709	0	0.7	0.173355	FALSE
SARS2_nsp2_D23Y_R27C	FBXO22	Q8NEZ5	4|3|3	3|3|4|4|4|2|2|3|2|3|6|4|5|8|2|2|2	3.33	0.96	0.348104	0	0.65	0.174052	FALSE
SARS2_nsp2_D23Y_R27C	THOC2	Q8NI27	3|2|1	1|1|1|4|2|0|0|3|1|1|1|5|3|2|6|2|2	2	0.97	0.32212	0.01	0.58	0.16606	FALSE
SARS2_nsp2_D23Y_R27C	RP9	Q8TA86	15|16|11	14|13|16|15|14|11|13|11|19|8|12|13|13|8|14|16|19	14	1.04	0.327682	0	0.71	0.163841	FALSE
SARS2_nsp2_D23Y_R27C	GADD45GIP1	Q8TAE8	1|0|0	0|0|1|1|0|0|0|0|1|1|0|1|2|0|2|2|1	0.33	0.47	0.0344208	0	0.71	0.0172104	FALSE
SARS2_nsp2_D23Y_R27C	FAM76A	Q8TAV0	1|1|1	3|1|0|0|2|2|0|2|1|1|1|2|4|2|3|2|2	1	0.61	0.329786	0	0.71	0.164893	FALSE
SARS2_nsp2_D23Y_R27C	KLHDC4	Q8TBB5	1|1|0	0|1|0|1|1|0|0|0|0|0|0|1|2|0|2|2|3	0.67	0.87	0.233931	0	0.71	0.116966	FALSE
SARS2_nsp2_D23Y_R27C	DDX54	Q8TDD1	0|1|0	0|0|0|1|0|0|0|0|0|0|0|1|0|0|3|1|1	0.33	0.81	0.0211308	0	0.71	0.0105654	FALSE
SARS2_nsp2_D23Y_R27C	DTD1	Q8TEA8	1|1|0	1|1|0|1|1|1|0|0|0|0|0|1|0|0|1|1|0	0.67	1.42	0.253832	0	0.71	0.126916	FALSE
SARS2_nsp2_D23Y_R27C	GANC	Q8TET4	1|2|1	1|2|1|1|0|1|0|1|1|1|1|1|1|0|0|1|1	1.33	1.62	0.316238	0.08	0.46	0.198119	FALSE
SARS2_nsp2_D23Y_R27C	ZC3H15	Q8WU90	7|4|3	1|1|2|5|1|1|0|0|0|0|1|7|5|6|7|4|1	4.67	1.89	0.392709	0.13	0.42	0.261355	FALSE
SARS2_nsp2_D23Y_R27C	PPIL4	Q8WUA2	11|12|9	8|10|8|11|8|7|2|3|8|4|7|18|12|7|14|15|10	10.67	1.19	0.347464	0	0.69	0.173732	FALSE
SARS2_nsp2_D23Y_R27C	RNF138	Q8WVD3	1|1|1	0|1|0|3|0|0|0|0|1|0|1|1|2|0|2|1|2	1	1.21	0.352826	0	0.71	0.176413	FALSE
SARS2_nsp2_D23Y_R27C	NUDCD2	Q8WVJ2	1|2|3	0|0|0|0|0|0|0|0|0|0|0|0|4|2|0|2|1	2	3.78	0.647523	0.42	0.14	0.533762	FALSE
SARS2_nsp2_D23Y_R27C	SNRNP27	Q8WVK2	10|10|9	8|4|9|9|8|6|4|6|6|8|7|7|9|10|12|8|11	9.67	1.24	0.339624	0	0.68	0.169812	FALSE
SARS2_nsp2_D23Y_R27C	HNRNPLL	Q8WVV9	1|0|0	0|0|1|2|0|0|0|0|2|0|0|2|0|0|3|0|0	0.33	0.57	0.0224227	0	0.71	0.0112114	FALSE
SARS2_nsp2_D23Y_R27C	ATXN2L	Q8WWM7	3|3|4	0|1|0|1|0|2|0|0|2|0|0|5|7|1|3|4|3	3.33	1.95	0.372845	0.13	0.42	0.251422	FALSE
SARS2_nsp2_D23Y_R27C	SREK1	Q8WXA9	4|3|3	0|0|3|0|2|0|0|0|2|1|0|4|5|4|4|3|3	3.33	1.83	0.382096	0.08	0.47	0.231048	FALSE
SARS2_nsp2_D23Y_R27C	DNAJC9	Q8WXX5	3|1|3	2|4|3|2|0|0|0|3|1|1|0|1|0|0|3|0|0	2.33	1.98	0.327487	0.19	0.37	0.258743	FALSE
SARS2_nsp2_D23Y_R27C	H1-10	Q92522	3|1|1	3|4|3|2|4|1|1|2|5|3|2|2|2|2|2|2|1	1.67	0.69	0.29505	0	0.62	0.147525	FALSE
SARS2_nsp2_D23Y_R27C	PHF3	Q92576	1|1|0	2|1|1|1|2|1|0|0|1|0|0|2|0|0|1|0|1	0.67	0.87	0.224345	0	0.71	0.112173	FALSE
SARS2_nsp2_D23Y_R27C	HSPH1	Q92598	9|9|7	0|0|0|1|1|0|0|0|0|0|0|0|2|2|1|3|2	8.33	11.81	0.379802	1	0	0.689901	FALSE
SARS2_nsp2_D23Y_R27C	TFG	Q92734	3|4|2	0|0|0|0|0|0|0|0|0|0|0|1|0|1|2|8|1	3	3.92	0.607439	0.63	0.1	0.618719	FALSE
SARS2_nsp2_D23Y_R27C	DDX17	Q92841	10|8|8	10|6|15|15|11|6|5|10|9|10|8|11|9|3|14|8|6	8.67	0.94	0.330358	0	0.7	0.165179	FALSE
SARS2_nsp2_D23Y_R27C	KHSRP	Q92945	9|8|13	15|8|11|6|9|11|5|7|10|12|10|16|15|11|12|13|9	10	0.94	0.329519	0	0.7	0.16476	FALSE
SARS2_nsp2_D23Y_R27C	EMG1	Q92979	2|1|1	0|0|0|0|0|0|0|0|0|0|0|3|1|0|3|0|0	1.33	3.24	0.380871	0.2	0.37	0.290435	FALSE
SARS2_nsp2_D23Y_R27C	RPL36AL	Q969Q0	1|0|0	2|2|0|1|2|2|1|0|1|0|0|1|0|0|2|1|0	0.33	0.38	0.00664304	0	0.71	0.00332152	FALSE
SARS2_nsp2_D23Y_R27C	CCDC47	Q96A33	4|0|0	0|0|0|0|0|0|0|0|0|0|0|0|0|0|0|0|0	1.33	13.33	0.0438335	0.33	0.18	0.186917	FALSE
SARS2_nsp2_D23Y_R27C	LRRC59	Q96AG4	9|8|6	5|5|3|5|6|5|1|3|3|3|2|9|7|6|10|6|6	7.67	1.53	0.343848	0	0.62	0.171924	FALSE
SARS2_nsp2_D23Y_R27C	TOMM6	Q96B49	0|1|0	0|0|0|0|0|0|0|0|0|0|0|0|0|0|0|0|0	0.33	3.33	0.190459	0	0.71	0.0952293	FALSE
SARS2_nsp2_D23Y_R27C	AIDA	Q96BJ3	1|0|0	0|0|0|0|0|0|0|0|0|0|0|4|1|0|1|0|0	0.33	0.94	0.0999909	0	0.71	0.0499955	FALSE
SARS2_nsp2_D23Y_R27C	PINX1	Q96BK5	1|0|1	1|0|2|2|2|1|1|1|1|1|1|1|3|1|1|2|1	0.67	0.52	0.210064	0	0.71	0.105032	FALSE
SARS2_nsp2_D23Y_R27C	CCDC127	Q96BQ5	1|0|0	0|0|0|0|0|0|0|0|0|0|0|0|0|0|0|0|0	0.33	3.33	0.0365408	0	0.71	0.0182704	FALSE
SARS2_nsp2_D23Y_R27C	C12orf43	Q96C57	1|2|1	0|0|0|2|0|0|0|0|0|0|0|0|1|0|1|1|1	1.33	3.78	0.405433	0.22	0.35	0.312717	FALSE
SARS2_nsp2_D23Y_R27C	ENTR1	Q96C92	1|1|1	0|0|0|0|0|0|0|0|0|0|0|0|0|0|0|0|0	1	10	0.433964	0	0.71	0.216982	FALSE
SARS2_nsp2_D23Y_R27C	CCDC124	Q96CT7	11|10|9	12|16|12|18|17|11|6|9|15|9|10|15|14|8|12|14|10	10	0.82	0.329834	0	0.71	0.164917	FALSE
SARS2_nsp2_D23Y_R27C	SNRNP40	Q96DI7	1|1|0	0|0|0|0|0|0|0|0|0|0|0|1|1|0|2|1|0	0.67	2.27	0.32756	0	0.71	0.16378	FALSE
SARS2_nsp2_D23Y_R27C	MRRF	Q96E11	5|6|3	2|2|1|5|0|0|0|0|0|4|1|9|8|5|8|6|3	4.67	1.47	0.359431	0.01	0.56	0.184716	FALSE
SARS2_nsp2_D23Y_R27C	HOOK2	Q96ED9	0|0|1	0|0|0|0|0|0|0|0|0|0|0|0|1|0|0|0|0	0.33	3.33	0.547804	0	0.71	0.273902	FALSE
SARS2_nsp2_D23Y_R27C	TCEAL4	Q96EI5	0|0|1	0|0|1|1|0|0|0|0|0|0|0|1|0|0|0|0|0	0.33	1.89	0.0190356	0	0.71	0.00951779	FALSE
SARS2_nsp2_D23Y_R27C	RBM33	Q96EV2	2|0|1	1|1|0|0|1|1|1|0|1|1|1|1|1|1|0|1|0	1	1.42	0.230467	0.11	0.44	0.170234	FALSE
SARS2_nsp2_D23Y_R27C	TMA16	Q96EY4	9|11|7	11|8|11|10|9|7|10|9|12|8|10|6|10|8|9|10|12	9	0.96	0.329392	0	0.7	0.164696	FALSE
SARS2_nsp2_D23Y_R27C	ZNF503	Q96F45	1|1|2	0|0|0|0|1|0|1|0|1|0|1|3|2|0|1|1|0	1.33	2.06	0.302925	0.12	0.43	0.211463	FALSE
SARS2_nsp2_D23Y_R27C	LTV1	Q96GA3	0|0|1	0|0|0|0|0|0|0|0|1|0|1|1|3|1|1|2|0	0.33	0.57	0.029098	0	0.71	0.014549	FALSE
SARS2_nsp2_D23Y_R27C	MRPL48	Q96GC5	1|0|1	0|0|0|0|0|1|0|0|0|0|0|0|1|0|0|2|0	0.67	2.83	0.291388	0	0.71	0.145694	FALSE
SARS2_nsp2_D23Y_R27C	ATXN7L3B	Q96GX2	1|0|0	0|0|0|0|0|0|0|0|1|0|0|2|1|1|0|1|0	0.33	0.94	0.126399	0	0.71	0.0631993	FALSE
SARS2_nsp2_D23Y_R27C	ZC3HAV1L	Q96H79	9|9|6	6|4|10|8|6|5|3|6|10|3|4|9|10|9|9|11|8	8	1.12	0.331447	0	0.68	0.165724	FALSE
SARS2_nsp2_D23Y_R27C	PGAM5	Q96HS1	0|1|0	0|0|0|0|0|0|0|0|0|0|0|0|0|0|0|0|0	0.33	3.33	0.00681617	0	0.71	0.00340809	FALSE
SARS2_nsp2_D23Y_R27C	FUBP3	Q96I24	35|32|31	23|25|26|20|18|24|17|15|21|24|18|37|44|33|26|31|32	32.67	1.28	0.339867	0	0.71	0.169934	FALSE
SARS2_nsp2_D23Y_R27C	RBM17	Q96I25	6|2|7	8|13|6|5|4|8|10|4|13|6|8|13|14|14|7|8|6	5	0.58	0.299668	0	0.71	0.149834	FALSE
SARS2_nsp2_D23Y_R27C	ATP5MD	Q96IX5	1|0|1	0|0|0|0|0|0|0|0|0|0|0|0|0|0|1|0|0	0.67	6.67	0.208338	0	0.71	0.104169	FALSE
SARS2_nsp2_D23Y_R27C	RSRC1	Q96IZ7	3|2|2	2|2|3|0|1|3|2|1|4|1|2|2|3|3|3|4|3	2.33	1.02	0.350345	0	0.61	0.175172	FALSE
SARS2_nsp2_D23Y_R27C	THOC3	Q96J01	6|4|6	2|4|1|0|2|1|3|0|4|3|3|9|6|7|5|5|3	5.33	1.56	0.357774	0.01	0.57	0.183887	FALSE
SARS2_nsp2_D23Y_R27C	BTF3L4	Q96K17	3|2|2	0|0|0|0|0|0|0|0|0|0|0|3|2|0|2|1|0	2.33	4.96	0.603494	0.62	0.1	0.611747	FALSE
SARS2_nsp2_D23Y_R27C	LINC00615	Q96LM1	0|1|0	0|0|0|0|0|0|0|0|0|0|0|0|2|1|0|0|0	0.33	1.89	0.223637	0	0.71	0.111818	FALSE
SARS2_nsp2_D23Y_R27C	C9orf85	Q96MD7	1|0|0	0|0|0|0|0|0|0|0|0|0|0|0|0|1|1|1|0	0.33	1.89	0.308837	0	0.71	0.154419	FALSE
SARS2_nsp2_D23Y_R27C	TCEANC2	Q96MN5	1|1|0	2|1|2|2|1|1|0|1|3|1|1|2|3|1|1|3|2	0.67	0.42	0.207847	0	0.71	0.103923	FALSE
SARS2_nsp2_D23Y_R27C	ZMAT2	Q96NC0	3|2|1	0|1|2|0|3|1|1|2|1|0|1|4|1|3|3|3|1	2	1.26	0.339542	0.04	0.51	0.189771	FALSE
SARS2_nsp2_D23Y_R27C	SERPINB12	Q96P63	1|1|0	0|0|0|0|0|0|0|0|0|0|0|0|0|0|1|1|0	0.67	5.67	0.687521	0	0.71	0.34376	FALSE
SARS2_nsp2_D23Y_R27C	RBM14	Q96PK6	1|1|2	0|6|5|3|0|0|0|0|0|1|0|1|2|1|1|1|1	1.33	1.03	0.294645	0.03	0.53	0.162323	FALSE
SARS2_nsp2_D23Y_R27C	MCCC1	Q96RQ3	14|9|15	34|23|11|8|3|14|15|1|28|20|22|27|29|35|5|4|8	12.67	0.75	0.323872	0	0.71	0.161936	FALSE
SARS2_nsp2_D23Y_R27C	ADO	Q96SZ5	0|0|1	0|0|0|0|0|0|0|0|0|0|0|0|1|0|0|0|0	0.33	3.33	0.547805	0	0.71	0.273902	FALSE
SARS2_nsp2_D23Y_R27C	MAP7D2	Q96T17	1|1|1	2|1|0|1|0|1|0|1|2|1|0|1|1|0|0|1|1	1	1.31	0.344505	0	0.71	0.172252	FALSE
SARS2_nsp2_D23Y_R27C	RBM15	Q96T37	1|1|1	0|0|1|1|0|0|0|0|0|0|0|2|0|0|0|0|0	1	4.25	0.389864	0	0.71	0.194932	FALSE
SARS2_nsp2_D23Y_R27C	CNN2	Q99439	4|0|1	4|0|2|2|2|2|0|1|1|1|1|0|3|1|1|2|5	1.67	1.01	0.190576	0.08	0.47	0.135288	FALSE
SARS2_nsp2_D23Y_R27C	PARK7	Q99497	22|27|26	35|20|25|24|17|18|21|17|29|15|18|28|32|24|26|26|26	25	1.06	0.32973	0	0.71	0.164865	FALSE
SARS2_nsp2_D23Y_R27C	DNAJC2	Q99543	1|1|0	0|0|0|2|0|0|0|0|0|0|0|3|2|1|1|1|0	0.67	1.13	0.297129	0	0.71	0.148564	FALSE
SARS2_nsp2_D23Y_R27C	DNAJC7	Q99615	1|0|0	0|0|0|1|0|0|1|0|1|0|1|5|3|1|4|2|0	0.33	0.3	0.00409746	0	0.71	0.00204873	FALSE
SARS2_nsp2_D23Y_R27C	PHB2	Q99623	3|4|5	7|8|6|9|5|3|4|8|4|6|6|12|10|8|11|8|11	4	0.54	0.314044	0	0.71	0.157022	FALSE
SARS2_nsp2_D23Y_R27C	HSD17B10	Q99714	2|0|0	4|1|2|1|1|0|0|0|1|2|0|5|4|0|3|1|2	0.67	0.42	0.0173359	0.01	0.57	0.0136679	FALSE
SARS2_nsp2_D23Y_R27C	HNRNPAB	Q99729	0|0|1	0|2|2|2|0|0|0|0|1|0|0|0|0|0|1|0|0	0.33	0.71	0.0325818	0	0.71	0.0162909	FALSE
SARS2_nsp2_D23Y_R27C	CCT7	Q99832	14|14|16	0|1|1|1|0|0|0|0|1|0|0|7|9|6|9|10|10	14.67	4.53	0.462789	0.84	0.02	0.651395	FALSE
SARS2_nsp2_D23Y_R27C	VRK1	Q99986	3|1|0	0|1|0|4|0|0|0|0|0|0|0|5|3|0|9|1|0	1.33	0.99	0.202382	0.09	0.45	0.146191	FALSE
SARS2_nsp2_D23Y_R27C	NIPSNAP1	Q9BPW8	3|0|0	0|0|0|0|0|0|0|0|0|0|0|4|2|1|5|3|0	1	1.13	0.0862895	0.18	0.39	0.133145	FALSE
SARS2_nsp2_D23Y_R27C	DDX50	Q9BQ39	0|0|1	0|0|0|0|0|0|0|0|0|0|0|0|0|0|0|0|0	0.33	3.33	0.0241031	0	0.71	0.0120516	FALSE
SARS2_nsp2_D23Y_R27C	TRIR	Q9BQ61	2|0|1	0|0|2|1|0|0|1|0|1|1|0|1|2|0|1|0|1	1	1.55	0.212087	0.13	0.42	0.171044	FALSE
SARS2_nsp2_D23Y_R27C	MACROD1	Q9BQ69	4|3|2	1|2|0|2|1|1|0|0|1|1|1|3|5|3|5|3|2	3	1.65	0.362079	0.07	0.48	0.216039	FALSE
SARS2_nsp2_D23Y_R27C	TUBA1C	Q9BQE3	2|1|3	0|0|1|0|0|0|0|0|0|0|0|5|4|2|2|5|3	2	1.55	0.30968	0.12	0.43	0.21484	FALSE
SARS2_nsp2_D23Y_R27C	NUDT16L1	Q9BRJ7	2|1|1	1|3|4|2|4|2|2|2|2|2|4|1|3|3|3|3|2	1.33	0.53	0.309332	0	0.71	0.154666	FALSE
SARS2_nsp2_D23Y_R27C	PDCD2L	Q9BRP1	1|3|1	2|2|2|2|3|2|2|2|1|1|3|1|5|4|4|3|5	1.67	0.64	0.283939	0	0.63	0.14197	FALSE
SARS2_nsp2_D23Y_R27C	PYM1	Q9BRP8	4|1|2	0|1|1|6|1|1|0|0|0|1|1|5|4|3|4|1|0	2.33	1.37	0.341231	0.08	0.47	0.210616	FALSE
SARS2_nsp2_D23Y_R27C	RIOK1	Q9BRS2	3|4|3	0|1|1|2|1|0|0|2|0|0|1|4|4|3|6|6|4	3.33	1.62	0.394705	0.04	0.5	0.217353	FALSE
SARS2_nsp2_D23Y_R27C	LLPH	Q9BRT6	1|0|0	0|0|0|0|0|0|0|0|0|1|0|0|1|0|1|1|1	0.33	1.13	0.0508211	0	0.71	0.0254106	FALSE
SARS2_nsp2_D23Y_R27C	PELO	Q9BRX2	4|1|3	7|4|8|11|5|5|3|5|6|5|5|6|6|2|7|4|3	2.67	0.49	0.290373	0	0.71	0.145186	FALSE
SARS2_nsp2_D23Y_R27C	NTPCR	Q9BSD7	5|4|4	8|6|10|8|7|7|5|8|9|6|5|6|6|4|7|6|5	4.33	0.65	0.325328	0	0.71	0.162664	FALSE
SARS2_nsp2_D23Y_R27C	TACO1	Q9BSH4	3|1|2	0|0|0|2|0|0|0|0|0|1|1|4|2|1|7|2|0	2	1.7	0.384284	0.16	0.4	0.272142	FALSE
SARS2_nsp2_D23Y_R27C	MTG1	Q9BT17	2|1|0	1|0|1|1|2|0|0|0|1|1|0|1|0|1|2|1|1	1	1.31	0.224849	0.1	0.45	0.162425	FALSE
SARS2_nsp2_D23Y_R27C	RBM42	Q9BTD8	1|0|0	0|0|0|0|0|0|0|0|0|0|0|1|0|0|1|0|0	0.33	2.83	0.416072	0	0.71	0.208036	FALSE
SARS2_nsp2_D23Y_R27C	MCMBP	Q9BTE3	0|1|1	1|0|1|0|0|0|0|0|2|0|1|0|0|1|0|1|0	0.67	1.62	0.228553	0	0.71	0.114276	FALSE
SARS2_nsp2_D23Y_R27C	DCUN1D5	Q9BTE7	3|1|3	2|2|2|2|2|1|1|0|2|0|1|5|3|2|4|4|3	2.33	1.1	0.314353	0.01	0.57	0.162176	FALSE
SARS2_nsp2_D23Y_R27C	C1orf35	Q9BU76	6|9|7	10|9|11|10|8|8|8|8|11|6|8|10|9|6|5|7|10	7.33	0.87	0.323715	0	0.7	0.161857	FALSE
SARS2_nsp2_D23Y_R27C	TUBB6	Q9BUF5	0|1|0	0|0|0|0|0|0|0|0|0|0|0|0|0|0|1|0|0	0.33	3.33	0.00350489	0	0.71	0.00175245	FALSE
SARS2_nsp2_D23Y_R27C	TMED9	Q9BVK6	0|0|1	0|0|0|0|0|0|0|0|0|0|0|0|0|0|0|0|0	0.33	3.33	0.023331	0	0.71	0.0116655	FALSE
SARS2_nsp2_D23Y_R27C	GNL3	Q9BVP2	0|0|1	0|1|0|0|0|0|0|0|0|0|0|2|1|0|1|0|0	0.33	1.13	0.0100149	0	0.71	0.00500746	FALSE
SARS2_nsp2_D23Y_R27C	RIOK2	Q9BVS4	1|0|0	0|0|0|0|0|0|0|0|0|0|0|0|0|0|2|0|0	0.33	2.83	0.391096	0	0.71	0.195548	FALSE
SARS2_nsp2_D23Y_R27C	HIGD2A	Q9BW72	1|0|0	0|0|0|0|0|0|0|0|0|0|0|0|0|0|0|0|0	0.33	3.33	0.32016	0	0.71	0.16008	FALSE
SARS2_nsp2_D23Y_R27C	REPIN1	Q9BWE0	1|2|2	1|1|1|1|1|0|1|0|3|2|1|2|2|0|1|1|2	1.67	1.42	0.366303	0.06	0.49	0.213152	FALSE
SARS2_nsp2_D23Y_R27C	CHID1	Q9BWS9	5|2|1	2|2|1|4|0|0|0|0|1|2|1|7|5|2|7|4|0	2.67	1.19	0.320545	0.05	0.5	0.185272	FALSE
SARS2_nsp2_D23Y_R27C	NAA15	Q9BXJ9	2|0|0	0|0|0|0|0|0|0|0|0|0|0|5|0|0|2|0|0	0.67	1.62	0.333688	0.22	0.35	0.276844	FALSE
SARS2_nsp2_D23Y_R27C	SRRT	Q9BXP5	4|1|1	0|0|0|1|0|0|0|0|0|0|0|4|2|0|6|1|0	2	2.43	0.430819	0.24	0.35	0.33541	FALSE
SARS2_nsp2_D23Y_R27C	RTF2	Q9BY42	4|2|2	2|3|4|3|3|1|2|1|3|3|2|4|5|0|3|3|3	2.67	1.01	0.331137	0	0.61	0.165569	FALSE
SARS2_nsp2_D23Y_R27C	EIF2A	Q9BY44	5|2|1	0|0|0|6|1|1|0|0|0|1|0|11|7|1|9|2|1	2.67	1.13	0.336151	0.05	0.5	0.193076	FALSE
SARS2_nsp2_D23Y_R27C	POLDIP3	Q9BY77	3|0|1	2|2|1|3|1|0|0|0|1|1|1|1|1|1|3|0|0	1.33	1.26	0.194482	0.12	0.43	0.157241	FALSE
SARS2_nsp2_D23Y_R27C	GNB1L	Q9BYB4	6|3|5	8|7|5|11|10|10|4|5|7|1|3|4|5|6|7|6|9	4.67	0.73	0.322076	0	0.71	0.161038	FALSE
SARS2_nsp2_D23Y_R27C	MRPL1	Q9BYD6	0|1|0	0|0|0|0|0|0|0|0|0|0|0|1|1|1|0|1|0	0.33	1.42	0.149271	0	0.71	0.0746356	FALSE
SARS2_nsp2_D23Y_R27C	GTPBP4	Q9BZE4	1|0|0	1|4|5|3|5|2|1|3|3|0|0|5|3|3|4|9|4	0.33	0.1	0.00337641	0	0.71	0.0016882	FALSE
SARS2_nsp2_D23Y_R27C	UPF3B	Q9BZI7	2|1|1	0|2|0|2|4|0|0|1|1|1|1|3|1|1|3|3|2	1.33	0.91	0.33558	0.01	0.57	0.17279	FALSE
SARS2_nsp2_D23Y_R27C	UBL5	Q9BZL1	1|0|0	0|0|0|1|0|0|0|0|0|1|0|2|2|0|1|2|0	0.33	0.63	0.0121348	0	0.71	0.0060674	FALSE
SARS2_nsp2_D23Y_R27C	PITHD1	Q9GZP4	1|0|0	3|2|2|1|1|1|2|1|2|0|1|1|1|2|1|2|2	0.33	0.23	0.00540572	0	0.71	0.00270286	FALSE
SARS2_nsp2_D23Y_R27C	EGLN1	Q9GZT9	0|1|0	0|0|1|0|1|0|0|0|0|0|0|0|1|0|1|0|0	0.33	1.42	0.0400204	0	0.71	0.0200102	FALSE
SARS2_nsp2_D23Y_R27C	CLPB	Q9H078	4|0|0	0|0|0|0|0|0|0|0|0|0|0|6|2|0|3|1|0	1.33	1.89	0.0263429	0.26	0.33	0.143171	FALSE
SARS2_nsp2_D23Y_R27C	NAT10	Q9H0A0	0|0|2	0|1|1|0|0|1|1|0|1|0|0|1|0|1|0|0|0	0.67	1.62	0.0136151	0.19	0.38	0.101808	FALSE
SARS2_nsp2_D23Y_R27C	ILKAP	Q9H0C8	0|1|0	2|2|1|0|0|0|0|0|1|1|0|2|3|1|0|0|1	0.33	0.4	0.0137076	0	0.71	0.00685381	FALSE
SARS2_nsp2_D23Y_R27C	XRN2	Q9H0D6	0|1|0	0|1|0|0|0|0|0|1|0|0|1|1|1|0|0|0|0	0.33	1.13	0.00983611	0	0.71	0.00491806	FALSE
SARS2_nsp2_D23Y_R27C	NSRP1	Q9H0G5	2|2|1	1|0|0|0|0|0|0|0|0|0|0|2|3|1|2|1|1	1.67	2.58	0.481933	0.26	0.33	0.370967	FALSE
SARS2_nsp2_D23Y_R27C	DDX47	Q9H0S4	2|3|2	2|3|2|2|4|1|0|3|2|1|3|2|3|3|4|3|2	2.33	0.99	0.324065	0	0.61	0.162033	FALSE
SARS2_nsp2_D23Y_R27C	IRF2BPL	Q9H1B7	0|1|2	0|0|0|0|0|0|0|0|0|0|0|2|3|0|1|1|1	1	2.12	0.288432	0.18	0.39	0.234216	FALSE
SARS2_nsp2_D23Y_R27C	NUCKS1	Q9H1E3	2|0|1	1|1|0|3|1|0|0|0|1|1|0|3|0|0|3|1|0	1	1.13	0.226087	0.08	0.47	0.153044	FALSE
SARS2_nsp2_D23Y_R27C	CARD9	Q9H257	1|0|1	1|0|0|0|0|0|0|0|0|0|1|1|1|1|0|0|0	0.67	2.27	0.226778	0	0.71	0.113389	FALSE
SARS2_nsp2_D23Y_R27C	MTIF3	Q9H2K0	0|1|0	1|0|0|0|2|1|0|0|2|1|1|2|2|1|0|2|0	0.33	0.38	0.0107207	0	0.71	0.00536033	FALSE
SARS2_nsp2_D23Y_R27C	MRPL46	Q9H2W6	1|1|1	0|0|0|1|0|0|0|0|0|1|0|1|1|1|1|2|1	1	1.89	0.424295	0	0.71	0.212148	FALSE
SARS2_nsp2_D23Y_R27C	PNN	Q9H307	0|0|2	0|2|4|3|0|2|1|0|0|0|1|1|1|0|2|0|0	0.67	0.67	0.0342481	0.06	0.49	0.047124	FALSE
SARS2_nsp2_D23Y_R27C	C12orf65	Q9H3J6	1|1|1	1|1|1|1|0|1|0|1|1|0|2|0|0|1|1|0|1	1	1.42	0.347309	0	0.71	0.173655	FALSE
SARS2_nsp2_D23Y_R27C	BOLA2	Q9H3K6	4|4|6	5|5|7|6|5|4|4|5|5|3|4|4|4|4|4|4|4	4.67	1.03	0.324503	0	0.66	0.162252	FALSE
SARS2_nsp2_D23Y_R27C	ESF1	Q9H501	0|1|0	0|0|1|0|0|0|0|1|0|0|0|0|0|0|0|0|0	0.33	2.83	0.0368633	0	0.71	0.0184316	FALSE
SARS2_nsp2_D23Y_R27C	AAMDC	Q9H7C9	1|1|1	3|2|2|1|2|3|3|1|3|3|2|3|3|3|3|4|4	1	0.38	0.323576	0	0.71	0.161788	FALSE
SARS2_nsp2_D23Y_R27C	ZNF703	Q9H7S9	1|1|1	0|0|0|0|0|0|0|0|1|0|0|0|0|0|1|1|1	1	4.25	0.365721	0	0.71	0.18286	FALSE
SARS2_nsp2_D23Y_R27C	NT5DC2	Q9H857	3|2|2	6|0|7|2|4|1|0|2|0|2|3|0|2|2|2|2|3	2.33	1.04	0.33564	0	0.6	0.16782	FALSE
SARS2_nsp2_D23Y_R27C	BRD9	Q9H8M2	1|0|0	0|0|1|1|1|0|0|0|0|0|0|1|1|0|1|1|0	0.33	0.81	0.0703461	0	0.71	0.0351731	FALSE
SARS2_nsp2_D23Y_R27C	JPT2	Q9H910	1|2|2	4|1|2|2|2|0|0|0|2|2|1|3|3|3|4|3|2	1.67	0.83	0.332319	0	0.71	0.166159	FALSE
SARS2_nsp2_D23Y_R27C	LRRC40	Q9H9A6	1|0|1	3|1|3|1|1|0|0|1|3|2|1|1|1|2|4|3|1	0.67	0.4	0.213132	0	0.71	0.106566	FALSE
SARS2_nsp2_D23Y_R27C	FN3KRP	Q9HA64	1|1|2	5|4|5|4|5|3|3|3|4|2|3|3|3|4|3|3|3	1.33	0.38	0.301858	0	0.71	0.150929	FALSE
SARS2_nsp2_D23Y_R27C	CACYBP	Q9HB71	12|9|2	4|8|4|13|5|4|4|4|5|4|5|17|12|6|17|8|2	7.67	1.07	0.283991	0	0.66	0.141995	FALSE
SARS2_nsp2_D23Y_R27C	PARVG	Q9HBI0	0|1|1	0|0|1|1|1|1|1|1|1|0|1|1|0|1|2|1|1	0.67	0.81	0.218541	0	0.71	0.10927	FALSE
SARS2_nsp2_D23Y_R27C	GLOD4	Q9HC38	2|1|2	2|4|2|1|1|2|2|2|4|3|3|3|3|3|4|4|4	1.67	0.6	0.321538	0	0.71	0.160769	FALSE
SARS2_nsp2_D23Y_R27C	MCCC2	Q9HCC0	11|2|9	32|21|9|4|3|14|11|4|24|18|17|18|22|24|9|10|9	7.33	0.5	0.27889	0	0.71	0.139445	FALSE
SARS2_nsp2_D23Y_R27C	CWC22	Q9HCG8	1|1|0	3|3|3|3|0|2|2|0|3|0|2|3|2|2|1|3|2	0.67	0.33	0.203975	0	0.71	0.101988	FALSE
SARS2_nsp2_D23Y_R27C	CHMP1A	Q9HD42	1|3|1	2|1|3|2|2|2|1|1|2|3|3|2|2|1|3|1|0	1.67	0.91	0.290954	0.01	0.56	0.150477	FALSE
SARS2_nsp2_D23Y_R27C	ZCCHC17	Q9NP64	10|10|10	9|15|10|13|9|9|11|12|17|4|7|12|13|10|12|12|12	10	0.91	0.332633	0	0.71	0.166316	FALSE
SARS2_nsp2_D23Y_R27C	LUC7L	Q9NQ29	4|7|4	5|4|5|4|6|5|4|5|4|5|3|5|5|6|7|8|6	5	0.98	0.321778	0	0.66	0.160889	FALSE
SARS2_nsp2_D23Y_R27C	MRPL40	Q9NQ50	1|0|1	0|0|0|0|0|0|0|0|0|0|1|1|1|1|0|0|0	0.67	2.83	0.301742	0	0.71	0.150871	FALSE
SARS2_nsp2_D23Y_R27C	WASH6P	Q9NQA3	1|1|1	0|0|0|0|0|0|0|0|0|0|0|0|0|0|0|0|0	1	10	0.993295	0	0.71	0.496648	FALSE
SARS2_nsp2_D23Y_R27C	DDX21	Q9NR30	0|1|1	0|5|6|0|0|0|0|0|3|0|0|1|1|0|3|1|0	0.67	0.57	0.199838	0	0.71	0.0999191	FALSE
SARS2_nsp2_D23Y_R27C	CDC42SE1	Q9NRR8	1|1|1	0|0|0|0|0|0|0|0|0|0|0|1|1|1|2|2|0	1	2.43	0.691493	0	0.71	0.345747	FALSE
SARS2_nsp2_D23Y_R27C	PNO1	Q9NRX1	1|0|1	1|1|1|3|1|0|0|0|1|2|1|2|2|0|3|0|1	0.67	0.6	0.211618	0	0.71	0.105809	FALSE
SARS2_nsp2_D23Y_R27C	HELLS	Q9NRZ9	3|1|1	0|0|0|1|0|0|0|0|0|0|0|6|2|0|6|0|0	1.67	1.89	0.440298	0.2	0.37	0.320149	FALSE
SARS2_nsp2_D23Y_R27C	TOMM22	Q9NS69	1|0|0	0|0|0|0|0|0|0|0|0|0|0|0|0|0|0|0|0	0.33	3.33	0.0133618	0	0.71	0.0066809	FALSE
SARS2_nsp2_D23Y_R27C	LANCL2	Q9NS86	2|2|1	1|2|3|3|3|3|2|3|2|0|2|2|3|0|3|2|3	1.67	0.77	0.320728	0	0.71	0.160364	FALSE
SARS2_nsp2_D23Y_R27C	FARSB	Q9NSD9	1|3|1	4|1|0|0|1|0|0|0|2|5|2|2|4|3|1|1|1	1.67	1.05	0.30663	0.03	0.52	0.168315	FALSE
SARS2_nsp2_D23Y_R27C	FAM207A	Q9NSI2	1|0|1	0|0|0|0|0|0|0|0|0|0|0|0|0|1|1|2|0	0.67	2.83	0.25714	0	0.71	0.12857	FALSE
SARS2_nsp2_D23Y_R27C	DIAPH3	Q9NSV4	3|2|1	5|3|4|1|3|3|2|1|3|3|4|8|8|6|2|6|3	2	0.52	0.30808	0	0.71	0.15404	FALSE
SARS2_nsp2_D23Y_R27C	DECR2	Q9NUI1	1|1|1	2|0|0|2|0|0|0|0|1|1|0|1|1|0|0|1|0	1	1.89	0.342071	0	0.71	0.171035	FALSE
SARS2_nsp2_D23Y_R27C	LIN7C	Q9NUP9	1|0|1	0|0|0|0|0|0|0|0|1|0|0|0|0|0|0|0|0	0.67	6.67	0.788566	0	0.71	0.394283	FALSE
SARS2_nsp2_D23Y_R27C	SEPTIN11	Q9NVA2	1|2|1	0|0|0|0|0|0|0|0|0|0|0|0|0|0|0|0|0	1.33	13.33	0.973282	0.32	0.22	0.646641	FALSE
SARS2_nsp2_D23Y_R27C	ATAD3A	Q9NVI7	0|1|1	0|0|0|0|0|0|0|0|0|0|0|0|0|0|0|0|0	0.67	6.67	0.201867	0	0.71	0.100934	FALSE
SARS2_nsp2_D23Y_R27C	GNL3L	Q9NVN8	1|1|2	0|1|1|4|4|0|1|0|0|0|1|3|3|2|4|2|1	1.33	0.84	0.31643	0.01	0.57	0.163215	FALSE
SARS2_nsp2_D23Y_R27C	MTPAP	Q9NVV4	1|0|0	0|0|0|0|0|0|0|0|0|0|0|0|0|0|0|0|0	0.33	3.33	0.0321687	0	0.71	0.0160843	FALSE
SARS2_nsp2_D23Y_R27C	RBM22	Q9NW64	1|0|0	0|0|1|1|0|0|0|0|1|0|0|1|2|0|2|1|1	0.33	0.57	0.0158082	0	0.71	0.00790408	FALSE
SARS2_nsp2_D23Y_R27C	ARGLU1	Q9NWB6	6|7|4	7|3|3|4|3|5|5|3|6|2|5|8|8|3|7|6|7	5.67	1.13	0.330783	0	0.66	0.165391	FALSE
SARS2_nsp2_D23Y_R27C	NHP2	Q9NX24	2|1|1	0|1|2|2|1|3|0|1|0|1|0|1|0|0|0|1|0	1.33	1.74	0.346516	0.09	0.45	0.218258	FALSE
SARS2_nsp2_D23Y_R27C	HYPK	Q9NX55	1|0|0	0|0|0|0|0|0|0|0|0|0|0|1|0|0|1|0|0	0.33	2.83	0.416073	0	0.71	0.208037	FALSE
SARS2_nsp2_D23Y_R27C	LYAR	Q9NX58	1|0|1	4|6|2|3|4|2|1|4|5|2|5|2|2|3|3|3|3	0.67	0.21	0.1981	0	0.71	0.0990501	FALSE
SARS2_nsp2_D23Y_R27C	CWC25	Q9NXE8	3|1|1	5|3|7|3|3|3|3|2|2|2|2|4|4|2|3|5|5	1.67	0.49	0.292308	0	0.71	0.146154	FALSE
SARS2_nsp2_D23Y_R27C	ALKBH4	Q9NXW9	0|0|1	0|0|0|0|0|0|0|0|0|0|1|2|0|0|0|0|0	0.33	1.89	0.178613	0	0.71	0.0893063	FALSE
SARS2_nsp2_D23Y_R27C	BCLAF1	Q9NYF8	2|2|2	0|2|3|8|2|2|1|0|2|0|2|2|2|2|3|3|2	2	0.94	0.338318	0	0.71	0.169159	FALSE
SARS2_nsp2_D23Y_R27C	MIS18A	Q9NYP9	4|3|2	3|4|3|1|2|2|2|0|3|1|2|5|3|3|4|4|5	3	1.09	0.337883	0	0.61	0.168942	FALSE
SARS2_nsp2_D23Y_R27C	TECR	Q9NZ01	1|0|0	0|0|0|0|0|0|0|0|0|0|0|0|0|0|0|0|0	0.33	3.33	0.00300266	0	0.71	0.00150133	FALSE
SARS2_nsp2_D23Y_R27C	IGF2BP1	Q9NZI8	0|0|1	0|5|4|1|0|0|0|0|2|0|0|0|0|0|3|0|0	0.33	0.38	0.00516233	0	0.71	0.00258116	FALSE
SARS2_nsp2_D23Y_R27C	CALML5	Q9NZT1	0|5|2	0|0|0|0|0|0|0|0|0|0|0|0|0|0|0|1|1	2.33	19.83	0.615772	0.65	0.08	0.632886	FALSE
SARS2_nsp2_D23Y_R27C	THYN1	Q9P016	3|1|1	7|4|8|4|5|6|6|7|7|4|4|4|4|1|5|3|2	1.67	0.35	0.28565	0	0.71	0.142825	FALSE
SARS2_nsp2_D23Y_R27C	CRIPT	Q9P021	3|5|2	2|0|4|3|1|0|3|2|2|1|1|3|3|1|4|3|3	3.33	1.57	0.320078	0.07	0.48	0.195039	FALSE
SARS2_nsp2_D23Y_R27C	SENP1	Q9P0U3	1|0|0	0|0|0|0|0|0|0|0|0|0|0|1|1|0|0|0|0	0.33	2.83	0.0201081	0	0.71	0.0100541	FALSE
SARS2_nsp2_D23Y_R27C	RCC2	Q9P258	19|19|13	20|20|19|29|20|15|14|19|17|9|14|25|21|18|24|19|17	17	0.9	0.327542	0	0.71	0.163771	FALSE
SARS2_nsp2_D23Y_R27C	RBM27	Q9P2N5	1|0|1	0|0|0|0|0|0|0|0|0|0|0|2|2|0|0|0|0	0.67	2.83	0.644481	0	0.71	0.32224	FALSE
SARS2_nsp2_D23Y_R27C	EIF3K	Q9UBQ5	0|0|1	0|0|0|0|0|0|0|0|0|0|0|0|0|0|0|0|0	0.33	3.33	0.685511	0	0.71	0.342755	FALSE
SARS2_nsp2_D23Y_R27C	MORF4L1	Q9UBU8	2|3|0	0|0|0|0|0|0|0|0|0|0|2|4|2|0|2|2|0	1.67	2.36	0.291587	0.33	0.17	0.310793	FALSE
SARS2_nsp2_D23Y_R27C	PEF1	Q9UBV8	4|3|4	1|0|2|2|1|1|1|3|0|1|1|5|4|5|4|4|4	3.67	1.6	0.363603	0.02	0.53	0.191801	FALSE
SARS2_nsp2_D23Y_R27C	UQCR10	Q9UDW1	1|0|1	0|0|0|0|0|0|0|0|0|0|0|0|0|0|0|0|0	0.67	6.67	0.395925	0	0.71	0.197963	FALSE
SARS2_nsp2_D23Y_R27C	VTI1B	Q9UEU0	0|1|0	0|0|0|0|0|0|0|0|0|0|0|0|0|0|0|0|0	0.33	3.33	0.062038	0	0.71	0.031019	FALSE
SARS2_nsp2_D23Y_R27C	CGGBP1	Q9UFW8	2|2|3	6|6|4|2|4|5|1|1|3|3|0|3|3|4|3|3|3	2.33	0.73	0.315861	0	0.71	0.157931	FALSE
SARS2_nsp2_D23Y_R27C	ABCF2	Q9UG63	8|4|1	1|1|0|6|0|0|0|0|1|1|0|10|2|0|10|2|0	4.33	2.17	0.319535	0.29	0.31	0.304768	FALSE
SARS2_nsp2_D23Y_R27C	SEC63	Q9UGP8	1|1|1	0|0|0|0|0|0|0|0|0|0|0|0|0|0|0|0|0	1	10	0.369558	0	0.71	0.184779	FALSE
SARS2_nsp2_D23Y_R27C	SEPTIN9	Q9UHD8	1|0|1	0|0|0|0|0|0|0|0|0|0|0|0|0|0|0|2|0	0.67	5.67	0.673339	0	0.71	0.33667	FALSE
SARS2_nsp2_D23Y_R27C	PFDN2	Q9UHV9	1|1|1	2|1|2|1|2|1|0|1|3|2|1|1|1|1|1|1|1	1	0.77	0.328609	0	0.71	0.164305	FALSE
SARS2_nsp2_D23Y_R27C	PUF60	Q9UHX1	11|12|9	7|8|9|9|8|4|3|3|6|5|4|17|20|12|15|16|12	10.67	1.15	0.359319	0	0.69	0.179659	FALSE
SARS2_nsp2_D23Y_R27C	TRMT112	Q9UI30	2|1|1	0|0|1|2|0|0|0|0|0|0|0|1|1|0|0|1|0	1.33	3.78	0.454026	0.22	0.35	0.337013	FALSE
SARS2_nsp2_D23Y_R27C	MRM2	Q9UI43	4|1|1	5|2|11|5|3|2|1|4|6|8|3|1|3|4|4|4|6	2	0.47	0.271985	0	0.71	0.135992	FALSE
SARS2_nsp2_D23Y_R27C	ATP5IF1	Q9UII2	2|2|1	1|4|4|4|5|5|1|3|4|3|4|3|4|0|3|6|3	1.67	0.5	0.306978	0	0.71	0.153489	FALSE
SARS2_nsp2_D23Y_R27C	DDX41	Q9UJV9	7|6|6	3|5|2|3|3|4|3|3|5|2|3|11|8|6|8|7|8	6.33	1.28	0.357171	0	0.65	0.178585	FALSE
SARS2_nsp2_D23Y_R27C	MRTO4	Q9UKD2	0|1|0	0|0|0|2|0|0|0|0|0|0|0|0|0|0|0|0|0	0.33	2.83	0.0165025	0	0.71	0.00825123	FALSE
SARS2_nsp2_D23Y_R27C	FBXO5	Q9UKT4	1|1|0	0|0|0|0|0|1|1|0|1|0|0|1|1|0|0|0|1	0.67	1.89	0.233118	0	0.71	0.116559	FALSE
SARS2_nsp2_D23Y_R27C	MCTS1	Q9ULC4	3|2|1	1|1|0|2|0|0|0|0|0|0|1|5|3|1|6|2|0	2	1.55	0.337701	0.12	0.43	0.22885	FALSE
SARS2_nsp2_D23Y_R27C	CORO1C	Q9ULV4	1|0|0	0|0|0|0|0|0|0|0|0|0|0|0|0|0|1|0|0	0.33	3.33	0.0278498	0	0.71	0.0139249	FALSE
SARS2_nsp2_D23Y_R27C	NOB1	Q9ULX3	1|0|0	0|0|0|1|0|0|0|0|0|0|0|1|0|0|0|0|0	0.33	2.83	0.0682503	0	0.71	0.0341252	FALSE
SARS2_nsp2_D23Y_R27C	ANAPC10	Q9UM13	1|1|1	0|0|1|0|0|0|0|1|0|1|0|1|1|1|0|0|0	1	2.83	0.364514	0	0.71	0.182257	FALSE
SARS2_nsp2_D23Y_R27C	PRPF19	Q9UMS4	2|1|3	1|2|1|3|1|0|0|0|4|0|2|2|1|3|1|2|1	2	1.42	0.321858	0.06	0.48	0.190929	FALSE
SARS2_nsp2_D23Y_R27C	NOL7	Q9UMY1	0|0|1	0|1|1|0|1|0|0|0|0|0|0|1|0|0|0|1|0	0.33	1.13	0.0569081	0	0.71	0.0284541	FALSE
SARS2_nsp2_D23Y_R27C	C19orf53	Q9UNZ5	2|1|0	0|2|2|3|2|1|2|3|2|1|2|0|0|0|1|1|0	1	0.77	0.197999	0.02	0.54	0.108999	FALSE
SARS2_nsp2_D23Y_R27C	SHOC2	Q9UQ13	0|1|0	0|0|0|1|0|0|0|0|0|0|0|1|1|1|2|0|0	0.33	0.94	0.152178	0	0.71	0.076089	FALSE
SARS2_nsp2_D23Y_R27C	SRRM2	Q9UQ35	8|5|6	6|5|6|6|4|5|5|3|6|4|3|7|12|8|6|8|10	6.33	1.04	0.346186	0	0.68	0.173093	FALSE
SARS2_nsp2_D23Y_R27C	PA2G4	Q9UQ80	20|11|3	1|0|0|10|0|0|0|0|0|1|0|21|12|2|20|3|0	11.33	2.75	0.346338	0.37	0.16	0.358169	FALSE
SARS2_nsp2_D23Y_R27C	SMC3	Q9UQE7	1|0|0	0|0|0|0|0|0|0|0|0|0|0|0|0|0|0|0|0	0.33	3.33	0.180037	0	0.71	0.0900184	FALSE
SARS2_nsp2_D23Y_R27C	CHMP2B	Q9UQN3	1|0|0	0|0|0|0|0|0|0|0|0|0|0|0|0|0|0|0|0	0.33	3.33	0.200766	0	0.71	0.100383	FALSE
SARS2_nsp2_D23Y_R27C	RTRAF	Q9Y224	2|0|1	1|1|1|0|0|0|0|0|2|1|1|4|2|2|3|1|1	1	0.85	0.206686	0.03	0.53	0.118343	FALSE
SARS2_nsp2_D23Y_R27C	PIN4	Q9Y237	6|5|5	6|3|6|6|4|2|3|2|5|5|2|6|6|4|8|5|5	5.33	1.16	0.34284	0	0.65	0.17142	FALSE
SARS2_nsp2_D23Y_R27C	HIGD1A	Q9Y241	1|0|1	0|0|0|0|1|0|0|1|0|0|0|0|1|0|0|0|0	0.67	3.78	0.223889	0	0.71	0.111945	FALSE
SARS2_nsp2_D23Y_R27C	EIF3L	Q9Y262	2|1|1	0|0|0|0|0|0|0|0|0|0|0|0|2|0|0|0|0	1.33	11.33	0.561011	0.31	0.3	0.435506	FALSE
SARS2_nsp2_D23Y_R27C	RUVBL1	Q9Y265	0|0|1	0|0|2|0|0|0|0|0|0|0|0|1|1|0|1|0|1	0.33	0.94	0.0115507	0	0.71	0.00577535	FALSE
SARS2_nsp2_D23Y_R27C	VDAC3	Q9Y277	3|3|3	0|0|0|0|0|0|0|0|0|0|0|0|0|0|0|0|0	3	30	0.359736	0.99	0	0.674868	FALSE
SARS2_nsp2_D23Y_R27C	FARSA	Q9Y285	1|2|2	1|0|1|3|1|1|0|0|1|1|0|1|1|0|2|3|3	1.67	1.49	0.317996	0.07	0.47	0.193998	FALSE
SARS2_nsp2_D23Y_R27C	DRG1	Q9Y295	9|7|4	1|2|0|2|1|2|0|0|0|5|1|8|9|5|5|4|0	6.67	2.52	0.388804	0.29	0.3	0.339402	FALSE
SARS2_nsp2_D23Y_R27C	DDX52	Q9Y2R4	1|0|1	2|3|1|1|4|2|1|1|2|2|4|1|0|2|1|0|0	0.67	0.42	0.201882	0	0.71	0.100941	FALSE
SARS2_nsp2_D23Y_R27C	TMA7	Q9Y2S6	6|6|4	9|5|5|3|4|5|4|4|5|2|5|7|7|5|6|4|5	5.33	1.07	0.329268	0	0.66	0.164634	FALSE
SARS2_nsp2_D23Y_R27C	CARHSP1	Q9Y2V2	3|2|3	1|3|4|1|5|1|2|1|2|2|2|2|2|3|4|4|3	2.67	1.08	0.347171	0	0.61	0.173585	FALSE
SARS2_nsp2_D23Y_R27C	THRAP3	Q9Y2W1	0|1|1	0|1|3|6|1|1|0|0|2|0|0|3|4|1|2|3|3	0.67	0.38	0.207754	0	0.71	0.103877	FALSE
SARS2_nsp2_D23Y_R27C	WBP11	Q9Y2W2	3|1|1	0|0|0|0|0|0|0|0|0|0|0|4|4|1|6|4|0	1.67	1.49	0.405039	0.14	0.42	0.272519	FALSE
SARS2_nsp2_D23Y_R27C	NOP58	Q9Y2X3	7|6|6	3|4|3|7|3|2|1|2|3|2|1|7|7|8|8|5|3	6.33	1.56	0.340382	0	0.61	0.170191	FALSE
SARS2_nsp2_D23Y_R27C	NOSIP	Q9Y314	10|8|5	6|3|6|10|3|4|3|4|6|4|4|8|11|7|8|8|6	7.67	1.29	0.345135	0	0.65	0.172568	FALSE
SARS2_nsp2_D23Y_R27C	LUC7L2	Q9Y383	23|26|20	21|21|20|21|21|24|23|15|24|13|11|24|28|14|21|19|21	23	1.15	0.33282	0	0.71	0.16641	FALSE
SARS2_nsp2_D23Y_R27C	RBMX2	Q9Y388	2|1|1	4|3|3|3|3|3|2|3|4|2|2|3|3|1|3|2|3	1.33	0.48	0.312627	0	0.71	0.156313	FALSE
SARS2_nsp2_D23Y_R27C	SBDS	Q9Y3A5	7|6|3	3|3|1|9|1|3|0|0|1|3|2|10|4|5|13|7|0	5.33	1.39	0.341752	0.01	0.59	0.175876	FALSE
SARS2_nsp2_D23Y_R27C	SF3B6	Q9Y3B4	1|0|1	1|1|1|0|1|1|0|1|1|1|1|1|1|1|1|1|1	0.67	0.76	0.2127	0	0.71	0.10635	FALSE
SARS2_nsp2_D23Y_R27C	WASHC3	Q9Y3C0	1|0|0	0|0|0|0|0|0|0|0|0|0|0|0|0|0|0|0|0	0.33	3.33	0.685511	0	0.71	0.342755	FALSE
SARS2_nsp2_D23Y_R27C	PPIL1	Q9Y3C6	2|3|1	0|1|1|2|1|1|1|1|1|1|1|3|2|2|2|2|1	2	1.48	0.334432	0.08	0.47	0.207216	FALSE
SARS2_nsp2_D23Y_R27C	MSRB2	Q9Y3D2	0|1|0	2|0|3|0|1|0|0|1|1|2|2|1|3|1|2|2|2	0.33	0.25	0.0173406	0	0.71	0.00867031	FALSE
SARS2_nsp2_D23Y_R27C	BOLA1	Q9Y3E2	0|1|0	4|2|2|1|2|1|0|1|1|2|1|2|3|1|0|0|1	0.33	0.24	0.0151851	0	0.71	0.00759253	FALSE
SARS2_nsp2_D23Y_R27C	RTCB	Q9Y3I0	0|0|1	1|0|3|3|2|0|0|0|3|1|1|3|1|0|3|2|0	0.33	0.25	0.00568368	0	0.71	0.00284184	FALSE
SARS2_nsp2_D23Y_R27C	FAM32A	Q9Y421	3|2|2	3|4|3|3|3|3|2|3|5|4|5|4|3|3|3|4|4	2.33	0.67	0.32412	0	0.71	0.16206	FALSE
SARS2_nsp2_D23Y_R27C	HBS1L	Q9Y450	1|1|0	0|0|0|1|0|0|0|0|0|0|0|2|1|0|5|1|0	0.67	1.13	0.349366	0	0.71	0.174683	FALSE
SARS2_nsp2_D23Y_R27C	AMMECR1	Q9Y4X0	3|4|3	3|2|3|3|3|2|2|1|2|2|3|4|5|2|4|3|4	3.33	1.18	0.357679	0	0.61	0.17884	FALSE
SARS2_nsp2_D23Y_R27C	PRRC2C	Q9Y520	0|0|1	0|0|0|0|0|0|0|0|0|0|0|0|0|0|0|0|0	0.33	3.33	0.0937589	0	0.71	0.0468795	FALSE
SARS2_nsp2_D23Y_R27C	PCDHB2	Q9Y5E7	1|1|1	0|0|0|0|0|0|0|0|0|0|0|0|0|0|0|0|0	1	10	0.993294	0	0.71	0.496647	FALSE
SARS2_nsp2_D23Y_R27C	TIMM13	Q9Y5L4	1|0|0	0|0|3|2|1|0|0|0|0|0|0|2|0|0|2|0|0	0.33	0.57	0.0109032	0	0.71	0.00545158	FALSE
SARS2_nsp2_D23Y_R27C	RBM8A	Q9Y5S9	1|1|2	0|0|1|2|1|1|0|0|1|0|0|2|1|0|2|0|0	1.33	2.06	0.353674	0.13	0.42	0.241837	FALSE
SARS2_nsp2_D23Y_R27C	USP16	Q9Y5T5	0|1|0	0|0|0|0|0|0|0|0|0|0|0|1|2|0|0|0|0	0.33	1.89	0.394953	0	0.71	0.197476	FALSE
SARS2_nsp2_D23Y_R27C	ZNF706	Q9Y5V0	2|2|2	2|2|1|2|2|2|2|2|1|1|2|0|2|2|2|1|1	2	1.26	0.34263	0.02	0.54	0.181315	FALSE
SARS2_nsp2_D23Y_R27C	NUBP2	Q9Y5Y2	1|0|2	1|0|0|0|1|0|0|1|1|0|2|1|3|1|1|0|1	1	1.31	0.199262	0.1	0.45	0.149631	FALSE
SARS2_nsp2_D23Y_R27C	PUS1	Q9Y606	2|0|0	3|2|4|2|4|1|0|2|1|1|3|4|2|1|5|4|2	0.67	0.28	0.0135378	0	0.71	0.00676891	FALSE
SARS2_nsp2_D23Y_R27C	SELENOK	Q9Y6D0	1|1|1	0|0|0|0|0|0|0|0|0|0|0|0|0|0|0|0|0	1	10	0.388659	0	0.71	0.194329	FALSE
SARS2_nsp2_D23Y_R27C	DDX49	Q9Y6V7	0|0|1	0|1|1|0|3|2|1|0|0|1|1|2|3|4|3|1|0	0.33	0.25	0.00545115	0	0.71	0.00272557	FALSE
SARS2_nsp2_D23Y_R27C	NA	SARS_CoV_2_nsp2	158|142|141	0|0|0|0|0|0|0|0|0|6|1|0|0|0|0|0|0	147	357	0.900518	1	0	0.950259	TRUE
SARS2_nsp2_E63K_E66K	NBDY	A0A0U1RRE5	1|1|1	3|0|2|3|2|0|0|3|1|2|1|3|3|2|1|1|2	1	0.59	0.31795	0	0.71	0.158975	FALSE
SARS2_nsp2_E63K_E66K	FAM168B	A1KXE4	1|0|0	1|0|0|0|0|1|0|0|1|2|1|0|1|1|1|1|1	0.33	0.52	0.00662976	0	0.71	0.00331488	FALSE
SARS2_nsp2_E63K_E66K	PGP	A6NDG6	1|1|2	2|3|6|4|5|4|4|5|6|3|3|3|8|5|5|5|3	1.33	0.31	0.296592	0	0.71	0.148296	FALSE
SARS2_nsp2_E63K_E66K	METTL15	A6NJ78	1|1|0	0|0|0|0|0|0|0|0|0|0|0|2|1|1|2|0|0	0.67	1.89	0.314844	0	0.71	0.157422	FALSE
SARS2_nsp2_E63K_E66K	MCRIP1	C9JLW8	1|1|0	0|0|0|0|0|0|0|0|0|0|0|0|0|1|0|1|0	0.67	5.67	0.362031	0	0.71	0.181015	FALSE
SARS2_nsp2_E63K_E66K	C11orf98	E9PRG8	2|3|3	1|1|0|1|2|1|1|0|0|0|2|1|0|1|0|0|0	2.67	4.12	0.346645	0.57	0.11	0.458323	FALSE
SARS2_nsp2_E63K_E66K	AIP	O00170	3|2|1	6|4|6|5|2|1|3|4|5|4|4|2|5|5|7|7|7	2	0.44	0.29367	0	0.71	0.146835	FALSE
SARS2_nsp2_E63K_E66K	ATOX1	O00244	5|4|5	4|3|4|8|3|4|4|5|3|1|0|8|5|7|5|7|5	4.67	1.04	0.322789	0	0.66	0.161394	FALSE
SARS2_nsp2_E63K_E66K	MEN1	O00255	1|0|0	0|0|0|0|0|0|0|0|0|0|0|0|0|0|0|0|0	0.33	3.33	0.68551	0	0.71	0.342755	FALSE
SARS2_nsp2_E63K_E66K	PGRMC1	O00264	5|5|5	0|0|0|0|0|0|0|0|0|0|0|0|0|0|0|0|0	5	50	0.362473	1	0	0.681237	FALSE
SARS2_nsp2_E63K_E66K	IPO5	O00410	2|4|5	0|0|0|0|0|0|0|0|0|0|0|0|0|0|0|0|0	3.67	36.67	0.322105	0.98	0	0.651053	FALSE
SARS2_nsp2_E63K_E66K	POLRMT	O00411	7|9|3	0|0|0|0|0|0|0|0|0|0|0|0|0|0|0|0|0	6.33	63.33	0.535192	1	0	0.767596	FALSE
SARS2_nsp2_E63K_E66K	IGF2BP3	O00425	10|9|6	0|0|0|0|0|0|0|0|0|0|0|0|0|0|0|0|0	8.33	83.33	0.480498	1	0	0.740249	FALSE
SARS2_nsp2_E63K_E66K	IFRD1	O00458	1|0|1	0|0|0|1|0|0|0|0|0|0|0|0|1|0|0|0|0	0.67	5.67	0.236501	0	0.71	0.11825	FALSE
SARS2_nsp2_E63K_E66K	HMGN4	O00479	2|2|1	1|2|1|2|2|2|3|1|0|2|3|2|1|1|2|0|1	1.67	1.09	0.306265	0.02	0.55	0.163132	FALSE
SARS2_nsp2_E63K_E66K	NDUFA4	O00483	1|0|0	0|0|1|0|0|0|0|1|1|0|1|1|1|1|1|1|0	0.33	0.63	0.00400858	0	0.71	0.00200429	FALSE
SARS2_nsp2_E63K_E66K	ZNF593	O00488	1|1|0	0|0|0|1|2|0|0|1|0|0|0|2|2|2|1|1|1	0.67	0.87	0.220386	0	0.71	0.110193	FALSE
SARS2_nsp2_E63K_E66K	PES1	O00541	10|8|7	1|2|1|6|5|4|0|0|2|1|2|6|6|4|7|5|2	8.33	2.62	0.364925	0.31	0.3	0.337462	FALSE
SARS2_nsp2_E63K_E66K	MPHOSPH10	O00566	4|0|3	0|0|0|0|0|0|0|0|0|0|0|0|0|0|0|0|0	2.33	23.33	0.45541	0.66	0.04	0.557705	FALSE
SARS2_nsp2_E63K_E66K	NOP56	O00567	37|28|30	0|3|1|1|0|0|0|1|2|0|0|2|3|1|3|0|0	31.67	31.67	0.460358	1	0	0.730179	FALSE
SARS2_nsp2_E63K_E66K	DDX3X	O00571	5|4|6	5|4|1|1|3|2|2|5|4|3|3|7|7|4|5|4|6	5	1.29	0.322178	0	0.63	0.161089	FALSE
SARS2_nsp2_E63K_E66K	GAPDHS	O14556	1|1|1	0|1|1|2|1|1|1|0|0|1|1|1|2|1|1|1|1	1	1.06	0.325798	0	0.71	0.162899	FALSE
SARS2_nsp2_E63K_E66K	IRS4	O14654	0|1|2	0|0|0|1|0|0|0|0|0|0|0|1|1|0|1|1|2	1	2.43	0.183688	0.19	0.38	0.186844	FALSE
SARS2_nsp2_E63K_E66K	PRMT5	O14744	1|1|0	0|0|0|0|0|0|0|0|0|0|0|1|1|1|0|2|0	0.67	2.27	0.463314	0	0.71	0.231657	FALSE
SARS2_nsp2_E63K_E66K	TCERG1	O14776	3|3|1	0|0|0|0|0|0|0|0|0|0|0|5|4|0|8|3|0	2.33	1.98	0.387236	0.27	0.32	0.328618	FALSE
SARS2_nsp2_E63K_E66K	UQCRQ	O14949	1|1|1	0|0|0|0|0|0|0|0|0|0|0|0|0|0|0|0|0	1	10	0.470955	0	0.71	0.235478	FALSE
SARS2_nsp2_E63K_E66K	AURKA	O14965	0|0|1	0|1|1|2|2|0|3|1|1|0|0|1|1|1|0|0|1	0.33	0.38	0.00413553	0	0.71	0.00206776	FALSE
SARS2_nsp2_E63K_E66K	SLC27A2	O14975	3|3|3	0|0|0|0|0|0|0|0|0|0|0|0|0|0|0|0|0	3	30	0.876118	0.99	0	0.933059	TRUE
SARS2_nsp2_E63K_E66K	HNRNPDL	O14979	1|0|0	0|1|0|0|0|0|0|0|2|0|0|0|0|0|0|0|0	0.33	1.89	0.0217918	0	0.71	0.0108959	FALSE
SARS2_nsp2_E63K_E66K	XPO1	O14980	1|1|1	0|0|0|0|0|0|0|0|0|0|0|0|0|0|0|0|0	1	10	0.31578	0	0.71	0.15789	FALSE
SARS2_nsp2_E63K_E66K	U2SURP	O15042	27|24|26	25|31|14|16|16|24|23|14|25|17|21|39|34|38|26|27|26	25.67	1.05	0.326407	0	0.71	0.163203	FALSE
SARS2_nsp2_E63K_E66K	ARPC3	O15145	1|1|0	2|1|0|1|0|1|0|1|1|0|1|0|0|0|0|1|0	0.67	1.26	0.207689	0	0.71	0.103845	FALSE
SARS2_nsp2_E63K_E66K	POLR1C	O15160	3|6|4	0|0|0|0|0|0|0|0|0|0|0|1|0|0|0|0|0	4.33	43.33	0.544402	1	0	0.772201	FALSE
SARS2_nsp2_E63K_E66K	WDR46	O15213	1|1|0	0|0|0|0|0|0|0|0|0|0|0|0|0|0|0|0|0	0.67	6.67	0.385219	0	0.71	0.192609	FALSE
SARS2_nsp2_E63K_E66K	NKRF	O15226	1|2|3	0|0|0|0|0|0|0|0|0|0|0|0|0|0|0|0|0	2	20	0.325664	0.65	0.06	0.487832	FALSE
SARS2_nsp2_E63K_E66K	MRPS12	O15235	4|2|2	6|2|6|6|4|3|1|6|3|1|2|4|3|2|4|3|2	2.67	0.78	0.30258	0	0.65	0.15129	FALSE
SARS2_nsp2_E63K_E66K	HMGB3	O15347	12|12|5	2|6|3|14|9|4|1|0|3|8|5|15|10|11|17|12|2	9.67	1.35	0.317754	0	0.66	0.158877	FALSE
SARS2_nsp2_E63K_E66K	EIF3D	O15371	3|3|1	0|0|0|1|0|0|0|0|1|0|0|4|2|2|6|5|5	2.33	1.53	0.366067	0.1	0.45	0.233034	FALSE
SARS2_nsp2_E63K_E66K	EIF3H	O15372	0|1|2	0|0|0|1|0|0|0|0|0|0|0|1|1|0|1|1|1	1	2.83	0.21106	0.22	0.36	0.21553	FALSE
SARS2_nsp2_E63K_E66K	CD3EAP	O15446	4|3|2	0|0|0|0|0|0|0|0|0|0|0|0|0|0|0|0|0	3	30	0.793413	0.98	0	0.886706	TRUE
SARS2_nsp2_E63K_E66K	DHX15	O43143	10|8|8	0|0|1|1|0|0|0|0|1|0|1|4|3|0|6|0|0	8.67	8.67	0.443005	0.94	0.01	0.691502	FALSE
SARS2_nsp2_E63K_E66K	RRP8	O43159	7|7|7	0|0|0|0|0|0|0|0|0|0|0|0|0|0|0|0|0	7	70	0.540277	1	0	0.770139	FALSE
SARS2_nsp2_E63K_E66K	CYB5B	O43169	1|1|2	0|0|0|0|0|0|0|0|0|0|0|0|0|0|0|0|0	1.33	13.33	0.400143	0.32	0.22	0.360072	FALSE
SARS2_nsp2_E63K_E66K	PHGDH	O43175	5|4|3	1|2|5|2|0|1|1|1|2|1|0|4|2|4|6|6|6	4	1.55	0.311429	0.02	0.54	0.165715	FALSE
SARS2_nsp2_E63K_E66K	PSMD3	O43242	0|0|1	0|0|0|1|0|0|0|0|0|0|0|0|1|0|2|1|5	0.33	0.57	0.00360685	0	0.71	0.00180342	FALSE
SARS2_nsp2_E63K_E66K	SART1	O43290	5|2|1	0|0|0|1|1|0|0|1|1|0|0|3|2|1|1|1|0	2.67	3.78	0.325556	0.44	0.14	0.382778	FALSE
SARS2_nsp2_E63K_E66K	HNRNPR	O43390	22|19|18	0|7|5|3|0|0|0|0|2|0|0|1|0|0|2|0|1	19.67	15.92	0.477921	1	0	0.738961	FALSE
SARS2_nsp2_E63K_E66K	TXNL1	O43396	1|2|2	3|1|3|3|0|0|0|1|3|2|1|1|3|1|2|2|1	1.67	1.05	0.315691	0.02	0.55	0.167846	FALSE
SARS2_nsp2_E63K_E66K	PPIH	O43447	0|1|0	0|0|0|0|0|0|0|0|0|0|0|0|0|0|0|0|0	0.33	3.33	0.316309	0	0.71	0.158155	FALSE
SARS2_nsp2_E63K_E66K	OIP5	O43482	1|0|1	3|1|1|1|1|2|2|0|2|1|1|5|3|5|2|2|2	0.67	0.33	0.203379	0	0.71	0.101689	FALSE
SARS2_nsp2_E63K_E66K	DENR	O43583	3|3|3	1|0|0|4|1|2|0|0|1|0|0|7|3|2|4|5|1	3	1.65	0.344223	0.06	0.49	0.202111	FALSE
SARS2_nsp2_E63K_E66K	PLRG1	O43660	3|3|4	0|0|0|0|0|0|0|0|0|0|0|0|0|0|0|0|0	3.33	33.33	0.457048	0.99	0	0.723524	FALSE
SARS2_nsp2_E63K_E66K	PRC1	O43663	0|1|0	0|0|3|1|1|0|0|2|0|1|0|1|1|1|2|1|0	0.33	0.4	0.00815504	0	0.71	0.00407752	FALSE
SARS2_nsp2_E63K_E66K	RGS10	O43665	2|4|3	1|0|0|0|0|0|1|0|0|0|1|3|4|3|3|5|2	3	2.22	0.414786	0.23	0.35	0.322393	FALSE
SARS2_nsp2_E63K_E66K	ZNF207	O43670	2|1|0	0|1|1|2|3|1|0|0|0|0|0|2|3|0|2|3|0	1	0.94	0.194197	0.05	0.5	0.122099	FALSE
SARS2_nsp2_E63K_E66K	BUB3	O43684	7|7|6	5|4|3|6|5|2|2|2|5|5|3|10|9|4|7|7|5	6.67	1.35	0.331433	0	0.65	0.165716	FALSE
SARS2_nsp2_E63K_E66K	TRAF3IP2	O43734	2|1|0	0|0|0|0|0|0|0|0|3|0|0|2|0|2|0|0|2	1	1.89	0.246611	0.17	0.39	0.208305	FALSE
SARS2_nsp2_E63K_E66K	NARS1	O43776	1|0|0	0|0|0|0|0|0|0|0|0|0|0|2|0|0|2|0|0	0.33	1.42	0.216999	0	0.71	0.1085	FALSE
SARS2_nsp2_E63K_E66K	NUDT21	O43809	6|7|5	1|2|2|4|2|2|1|1|0|2|2|6|6|6|5|5|2	6	2.08	0.350047	0.09	0.46	0.220023	FALSE
SARS2_nsp2_E63K_E66K	LANCL1	O43813	1|0|0	1|1|1|0|0|1|0|0|1|0|0|1|0|0|0|1|2	0.33	0.63	0.0234772	0	0.71	0.0117386	FALSE
SARS2_nsp2_E63K_E66K	TIMM8A	O60220	1|0|0	0|0|0|0|0|0|0|0|0|0|0|0|0|0|1|0|0	0.33	3.33	0.0317157	0	0.71	0.0158578	FALSE
SARS2_nsp2_E63K_E66K	DHX16	O60231	1|0|0	0|0|0|0|0|0|0|0|0|0|0|1|0|0|4|0|0	0.33	1.13	0.173025	0	0.71	0.0865126	FALSE
SARS2_nsp2_E63K_E66K	SMARCA5	O60264	2|0|0	0|1|1|0|0|0|0|0|0|0|0|0|0|0|1|0|0	0.67	3.78	0.0584632	0.29	0.31	0.174232	FALSE
SARS2_nsp2_E63K_E66K	URB1	O60287	3|0|4	0|0|0|0|0|0|0|0|0|0|0|0|0|0|0|0|0	2.33	23.33	0.310571	0.66	0.04	0.485285	FALSE
SARS2_nsp2_E63K_E66K	SYNCRIP	O60506	9|6|7	0|5|4|1|0|0|0|0|1|0|0|1|0|0|6|0|0	7.33	6.93	0.435117	0.87	0.01	0.652559	FALSE
SARS2_nsp2_E63K_E66K	EIF4E2	O60573	7|7|7	0|0|0|0|0|0|0|0|0|0|0|0|0|0|0|0|0	7	70	0.665319	1	0	0.83266	TRUE
SARS2_nsp2_E63K_E66K	CTNND1	O60716	4|1|2	0|3|3|0|1|0|0|1|1|3|1|10|6|2|6|3|2	2.33	0.94	0.291208	0.01	0.57	0.150604	FALSE
SARS2_nsp2_E63K_E66K	DPM1	O60762	1|0|1	0|0|0|0|0|0|0|0|0|0|0|0|0|0|0|0|0	0.67	6.67	0.199625	0	0.71	0.0998125	FALSE
SARS2_nsp2_E63K_E66K	MRPS14	O60783	1|2|1	0|0|0|0|0|0|0|0|0|0|0|0|0|0|0|0|0	1.33	13.33	0.606596	0.32	0.22	0.463298	FALSE
SARS2_nsp2_E63K_E66K	PQBP1	O60828	2|2|1	0|0|0|2|0|0|0|0|0|0|0|4|3|3|4|1|0	1.67	1.67	0.410643	0.14	0.42	0.275321	FALSE
SARS2_nsp2_E63K_E66K	DKC1	O60832	9|14|10	1|2|1|1|1|1|0|0|2|0|1|0|0|0|0|1|0	11	17	0.410796	1	0	0.705398	FALSE
SARS2_nsp2_E63K_E66K	EIF5B	O60841	9|8|6	8|9|10|13|14|6|2|3|6|5|5|17|14|11|17|22|14	7.67	0.74	0.32316	0	0.71	0.16158	FALSE
SARS2_nsp2_E63K_E66K	EDF1	O60869	4|5|2	3|4|2|5|2|2|1|1|2|2|3|5|4|1|7|4|2	3.67	1.25	0.311399	0.01	0.59	0.160699	FALSE
SARS2_nsp2_E63K_E66K	DNAJA2	O60884	1|0|1	0|0|0|0|0|0|0|0|0|0|0|1|0|1|1|1|0	0.67	2.83	0.197249	0	0.71	0.0986245	FALSE
SARS2_nsp2_E63K_E66K	BRD4	O60885	1|0|1	0|0|0|0|0|0|0|0|0|0|0|0|1|0|0|0|0	0.67	6.67	0.25802	0	0.71	0.12901	FALSE
SARS2_nsp2_E63K_E66K	PDCD6	O75340	5|5|4	3|4|8|7|4|4|4|3|5|4|3|4|7|4|4|5|5	4.67	1.02	0.326885	0	0.66	0.163442	FALSE
SARS2_nsp2_E63K_E66K	MACROH2A1	O75367	1|2|1	0|4|3|2|0|0|0|0|0|0|0|0|0|0|2|0|0	1.33	2.06	0.336399	0.15	0.41	0.2432	FALSE
SARS2_nsp2_E63K_E66K	NDUFS6	O75380	1|1|1	1|0|1|0|0|0|0|1|2|0|0|1|3|0|1|0|0	1	1.7	0.35217	0	0.71	0.176085	FALSE
SARS2_nsp2_E63K_E66K	PRPF40A	O75400	4|6|5	3|3|3|5|3|5|2|2|4|3|5|9|8|5|6|6|6	5	1.09	0.327161	0	0.66	0.16358	FALSE
SARS2_nsp2_E63K_E66K	PSIP1	O75475	1|1|1	1|1|2|4|1|0|0|2|0|1|1|3|2|0|4|2|1	1	0.68	0.326361	0	0.71	0.16318	FALSE
SARS2_nsp2_E63K_E66K	GPC4	O75487	0|0|1	0|0|0|0|0|0|0|0|0|0|0|0|0|0|0|0|0	0.33	3.33	0.119326	0	0.71	0.0596632	FALSE
SARS2_nsp2_E63K_E66K	SRSF10	O75494	0|1|1	0|0|0|0|0|0|0|0|0|0|0|0|0|0|0|0|0	0.67	6.67	0.399923	0	0.71	0.199961	FALSE
SARS2_nsp2_E63K_E66K	BANF1	O75531	0|0|1	2|2|3|4|0|0|0|0|0|0|0|0|0|0|3|0|1	0.33	0.38	0.00748937	0	0.71	0.00374468	FALSE
SARS2_nsp2_E63K_E66K	SF3B1	O75533	11|14|14	1|1|1|1|0|1|1|1|2|0|3|7|9|3|2|7|5	13	4.91	0.392711	0.91	0.01	0.651356	FALSE
SARS2_nsp2_E63K_E66K	NPM3	O75607	2|1|1	0|0|0|0|0|0|0|0|0|0|0|1|0|0|0|0|0	1.33	13.33	0.445622	0.32	0.22	0.382811	FALSE
SARS2_nsp2_E63K_E66K	SNRNP200	O75643	5|4|6	0|0|0|0|0|0|0|0|0|0|0|1|2|0|2|3|2	5	8.5	0.458984	0.92	0.01	0.689492	FALSE
SARS2_nsp2_E63K_E66K	SURF6	O75683	12|7|9	0|0|0|0|0|0|0|0|0|0|0|0|0|0|0|0|0	9.33	93.33	0.581831	1	0	0.790915	FALSE
SARS2_nsp2_E63K_E66K	NUP155	O75694	2|2|1	5|1|2|1|2|2|1|1|4|5|2|4|6|5|2|2|5	1.67	0.57	0.305864	0	0.71	0.152932	FALSE
SARS2_nsp2_E63K_E66K	BCAS2	O75934	7|7|8	0|0|0|0|0|0|0|0|0|0|0|0|0|0|0|0|0	7.33	73.33	0.569118	1	0	0.784559	FALSE
SARS2_nsp2_E63K_E66K	DNAJC8	O75937	10|10|7	3|2|1|9|5|3|1|1|2|4|3|10|11|8|11|6|2	9	1.87	0.335571	0.01	0.57	0.172786	FALSE
SARS2_nsp2_E63K_E66K	SMNDC1	O75940	6|6|7	3|4|3|4|5|5|1|2|3|2|3|6|7|6|7|5|4	6.33	1.54	0.331388	0	0.61	0.165694	FALSE
SARS2_nsp2_E63K_E66K	ATP5PD	O75947	4|4|2	0|0|0|0|0|0|0|0|0|0|0|0|0|0|0|0|0	3.33	33.33	0.353893	0.98	0	0.666946	FALSE
SARS2_nsp2_E63K_E66K	ATP5MG	O75964	2|1|1	0|0|0|0|0|0|0|0|0|0|0|0|0|0|0|0|0	1.33	13.33	0.345088	0.32	0.22	0.332544	FALSE
SARS2_nsp2_E63K_E66K	RSL1D1	O76021	33|34|36	0|0|0|0|0|0|0|0|0|0|0|0|0|0|0|0|0	34.33	343.33	0.53285	1	0	0.766425	FALSE
SARS2_nsp2_E63K_E66K	CLPX	O76031	3|1|1	0|1|0|1|1|0|0|0|0|1|0|2|1|1|2|1|0	1.67	2.58	0.3201	0.22	0.36	0.27005	FALSE
SARS2_nsp2_E63K_E66K	SRP72	O76094	8|4|4	0|0|0|0|0|0|0|0|0|0|0|0|0|0|0|0|0	5.33	53.33	0.368047	1	0	0.684024	FALSE
SARS2_nsp2_E63K_E66K	PLPBP	O94903	3|3|2	7|6|4|4|3|3|4|4|4|5|6|3|3|3|3|3|3	2.67	0.67	0.315194	0	0.71	0.157597	FALSE
SARS2_nsp2_E63K_E66K	PRPF6	O94906	1|0|2	0|0|0|0|0|0|0|0|0|0|0|0|0|0|0|0|0	1	10	0.565045	0.32	0.22	0.442523	FALSE
SARS2_nsp2_E63K_E66K	SEC31A	O94979	0|0|1	0|0|0|0|0|0|0|0|0|0|0|0|0|0|0|0|0	0.33	3.33	0.68551	0	0.71	0.342755	FALSE
SARS2_nsp2_E63K_E66K	HEXIM1	O94992	0|1|0	0|0|0|0|0|0|0|0|0|0|0|1|1|0|1|1|0	0.33	1.42	0.206882	0	0.71	0.103441	FALSE
SARS2_nsp2_E63K_E66K	ZRANB2	O95218	1|2|1	0|0|2|0|0|0|0|0|0|0|0|4|4|1|1|2|0	1.33	1.62	0.360191	0.11	0.44	0.235096	FALSE
SARS2_nsp2_E63K_E66K	LUC7L3	O95232	19|22|19	18|19|18|21|25|18|17|18|21|8|14|21|20|18|22|20|21	20	1.07	0.321921	0	0.71	0.16096	FALSE
SARS2_nsp2_E63K_E66K	VAPB	O95292	0|1|1	0|0|0|0|0|0|0|0|0|0|0|0|0|0|0|0|0	0.67	6.67	0.304676	0	0.71	0.152338	FALSE
SARS2_nsp2_E63K_E66K	LYPLA2	O95372	2|1|2	2|2|3|2|0|0|0|0|0|0|0|0|0|1|1|2|1	1.67	2.02	0.320089	0.17	0.4	0.245045	FALSE
SARS2_nsp2_E63K_E66K	IPO7	O95373	0|2|0	0|0|0|0|0|0|0|0|0|0|0|0|0|0|0|0|0	0.67	6.67	0.0151393	0.32	0.22	0.16757	FALSE
SARS2_nsp2_E63K_E66K	NSA2	O95478	4|5|4	0|0|0|0|0|0|0|0|0|0|0|0|0|0|0|0|0	4.33	43.33	0.651049	1	0	0.825525	TRUE
SARS2_nsp2_E63K_E66K	POLR1A	O95602	4|2|5	0|0|0|0|0|0|0|0|0|0|0|0|0|0|0|0|0	3.67	36.67	0.488084	0.98	0	0.734042	FALSE
SARS2_nsp2_E63K_E66K	POP4	O95707	2|0|1	0|0|0|0|0|0|0|0|0|0|0|0|0|0|0|0|0	1	10	0.493766	0.32	0.22	0.406883	FALSE
SARS2_nsp2_E63K_E66K	HSPA4L	O95757	2|2|0	0|0|0|0|0|0|0|1|0|0|0|0|0|0|0|0|0	1.33	13.33	0.208989	0.64	0.08	0.424495	FALSE
SARS2_nsp2_E63K_E66K	STAU1	O95793	12|13|10	0|0|0|0|0|0|0|0|0|0|0|0|0|0|0|0|0	11.67	116.67	0.553075	1	0	0.776538	FALSE
SARS2_nsp2_E63K_E66K	TTC4	O95801	0|0|2	0|0|0|0|0|0|0|0|0|0|0|2|0|0|0|0|0	0.67	5.67	0.0899898	0.31	0.3	0.199995	FALSE
SARS2_nsp2_E63K_E66K	BAG2	O95816	0|1|1	0|0|0|0|0|0|0|0|0|0|0|0|0|0|0|0|0	0.67	6.67	0.208038	0	0.71	0.104019	FALSE
SARS2_nsp2_E63K_E66K	MAP4K4	O95819	0|1|0	0|0|0|0|0|0|0|0|0|0|0|0|0|0|0|0|0	0.33	3.33	0.123096	0	0.71	0.0615481	FALSE
SARS2_nsp2_E63K_E66K	AIFM1	O95831	1|1|0	0|0|6|4|1|0|0|0|0|0|0|1|1|0|4|4|6	0.67	0.42	0.200612	0	0.71	0.100306	FALSE
SARS2_nsp2_E63K_E66K	TXNDC12	O95881	5|6|4	5|5|7|5|5|4|2|6|4|4|3|3|6|3|4|5|6	5	1.1	0.3237	0	0.65	0.16185	FALSE
SARS2_nsp2_E63K_E66K	NCR2	O95944	0|0|1	0|0|0|0|0|0|0|0|0|0|0|0|0|0|0|0|1	0.33	3.33	0.369696	0	0.71	0.184848	FALSE
SARS2_nsp2_E63K_E66K	TOMM40	O96008	1|0|1	0|0|0|0|0|0|0|0|0|0|0|0|0|0|0|0|0	0.67	6.67	0.268715	0	0.71	0.134357	FALSE
SARS2_nsp2_E63K_E66K	NSD2	O96028	3|2|2	0|0|0|0|0|0|0|0|0|0|0|0|0|0|0|0|0	2.33	23.33	0.647356	0.97	0.01	0.808678	TRUE
SARS2_nsp2_E63K_E66K	COX2	P00403	2|2|3	0|0|0|0|0|0|0|0|0|0|0|0|0|0|0|1|0	2.33	23.33	0.3476	0.97	0.01	0.6588	FALSE
SARS2_nsp2_E63K_E66K	SOD1	P00441	0|1|1	3|1|1|0|0|0|0|0|1|1|0|2|2|1|1|0|1	0.67	0.81	0.215855	0	0.71	0.107927	FALSE
SARS2_nsp2_E63K_E66K	HPRT1	P00492	4|5|5	2|3|3|2|1|2|1|2|4|2|2|4|6|2|1|4|3	4.67	1.8	0.332339	0.03	0.52	0.181169	FALSE
SARS2_nsp2_E63K_E66K	PGK1	P00558	0|1|0	1|2|1|2|3|0|0|0|1|1|2|3|1|1|1|0|1	0.33	0.28	0.00402824	0	0.71	0.00201412	FALSE
SARS2_nsp2_E63K_E66K	ATP6	P00846	1|1|1	0|0|0|0|0|0|0|0|0|0|0|0|0|0|0|1|0	1	10	0.377216	0	0.71	0.188608	FALSE
SARS2_nsp2_E63K_E66K	LMNA	P02545	1|1|1	0|0|1|1|0|0|0|0|1|0|0|2|1|1|1|1|1	1	1.7	0.388773	0	0.71	0.194386	FALSE
SARS2_nsp2_E63K_E66K	CSTB	P04080	5|4|4	5|7|6|4|5|5|5|6|8|3|5|5|3|5|5|5|6	4.33	0.84	0.317276	0	0.71	0.158638	FALSE
SARS2_nsp2_E63K_E66K	KRT1	P04264	1|1|1	0|0|0|0|1|0|0|0|0|0|0|0|0|1|1|2|1	1	2.83	0.372422	0	0.71	0.186211	FALSE
SARS2_nsp2_E63K_E66K	GAPDH	P04406	6|7|6	7|6|3|4|2|3|3|4|7|2|4|7|4|7|4|8|8	6.33	1.3	0.328685	0	0.65	0.164342	FALSE
SARS2_nsp2_E63K_E66K	HSPB1	P04792	1|0|0	0|0|0|1|1|0|0|1|0|0|0|0|0|0|2|1|1	0.33	0.81	0.00762961	0	0.71	0.00381481	FALSE
SARS2_nsp2_E63K_E66K	RPN1	P04843	9|8|9	0|0|0|0|0|0|0|0|0|0|0|0|0|0|1|0|0	8.67	86.67	0.328249	1	0	0.664125	FALSE
SARS2_nsp2_E63K_E66K	RPN2	P04844	6|5|7	0|0|0|0|0|0|0|0|0|0|0|0|0|0|0|0|0	6	60	0.335831	1	0	0.667915	FALSE
SARS2_nsp2_E63K_E66K	ATP1A1	P05023	4|5|5	0|0|0|0|0|0|0|0|1|0|0|2|1|0|1|1|2	4.67	9.92	0.315874	0.99	0	0.652937	FALSE
SARS2_nsp2_E63K_E66K	HMGN1	P05114	3|2|3	1|4|4|6|6|0|1|2|3|2|4|6|7|1|7|4|1	2.67	0.77	0.313373	0	0.71	0.156686	FALSE
SARS2_nsp2_E63K_E66K	SLC25A5	P05141	8|10|10	3|4|4|5|3|2|4|3|5|0|0|8|7|7|7|8|6	9.33	2.09	0.321773	0.04	0.51	0.180886	FALSE
SARS2_nsp2_E63K_E66K	PCCA	P05165	3|5|3	24|29|17|10|11|21|24|7|29|21|21|36|40|41|12|12|14	3.67	0.17	0.303224	0	0.71	0.151612	FALSE
SARS2_nsp2_E63K_E66K	PCCB	P05166	1|2|0	18|20|6|5|6|19|18|4|27|16|13|27|26|31|11|13|14	1	0.06	0.179408	0	0.71	0.0897041	FALSE
SARS2_nsp2_E63K_E66K	EIF2S1	P05198	3|1|1	0|0|0|3|0|0|0|0|0|0|0|6|2|2|7|6|1	1.67	1.05	0.306636	0.05	0.5	0.178318	FALSE
SARS2_nsp2_E63K_E66K	HMGN2	P05204	12|10|10	4|3|7|8|6|5|6|7|9|9|5|12|10|5|10|3|10	10.67	1.52	0.326749	0	0.66	0.163375	FALSE
SARS2_nsp2_E63K_E66K	RPLP1	P05386	6|7|7	1|2|1|1|0|0|0|0|4|0|0|0|0|0|1|0|0	6.67	11.33	0.380624	0.97	0	0.675312	FALSE
SARS2_nsp2_E63K_E66K	RPLP2	P05387	15|18|22	2|8|5|6|0|1|0|0|6|1|2|0|0|0|2|0|0	18.33	9.44	0.376815	0.98	0	0.678407	FALSE
SARS2_nsp2_E63K_E66K	RPLP0	P05388	6|7|5	0|2|1|2|0|0|0|0|1|0|0|0|0|0|0|0|0	6	17	0.404404	0.99	0	0.697202	FALSE
SARS2_nsp2_E63K_E66K	POLR3D	P05423	0|1|0	0|0|0|0|0|0|0|0|0|0|0|0|0|0|0|0|0	0.33	3.33	0.68551	0	0.71	0.342755	FALSE
SARS2_nsp2_E63K_E66K	SSB	P05455	5|2|5	0|0|1|1|0|0|0|0|0|0|0|1|0|0|0|0|0	4	22.67	0.34758	0.96	0.01	0.65379	FALSE
SARS2_nsp2_E63K_E66K	CDK1	P06493	6|1|1	0|0|0|0|0|0|0|0|2|1|2|6|3|1|3|1|0	2.67	2.39	0.240359	0.27	0.32	0.25518	FALSE
SARS2_nsp2_E63K_E66K	ATP5F1B	P06576	17|19|15	4|4|8|5|4|2|2|2|2|2|3|9|7|7|9|7|12	17	3.25	0.337622	0.74	0.02	0.538811	FALSE
SARS2_nsp2_E63K_E66K	ENO1	P06733	3|7|5	12|7|7|8|7|4|6|4|6|4|5|12|9|8|5|6|5	5	0.74	0.304302	0	0.69	0.152151	FALSE
SARS2_nsp2_E63K_E66K	NPM1	P06748	23|22|26	4|15|14|15|2|0|0|1|10|3|2|6|5|2|9|3|2	23.67	4.33	0.375972	0.89	0.01	0.632986	FALSE
SARS2_nsp2_E63K_E66K	P4HB	P07237	1|0|0	0|0|0|0|0|0|0|0|0|0|0|0|1|0|0|1|0	0.33	2.83	0.0024375	0	0.71	0.00121875	FALSE
SARS2_nsp2_E63K_E66K	H1-0	P07305	3|2|3	1|2|3|1|1|0|0|0|1|0|0|0|0|0|1|0|0	2.67	4.53	0.354895	0.62	0.1	0.487448	FALSE
SARS2_nsp2_E63K_E66K	ANXA2	P07355	2|3|2	2|2|2|2|0|2|1|1|2|2|1|6|3|2|4|2|1	2.33	1.13	0.333194	0.01	0.59	0.171597	FALSE
SARS2_nsp2_E63K_E66K	TUBB	P07437	6|9|8	5|4|7|3|6|2|2|5|4|2|3|8|5|5|6|4|5	7.67	1.71	0.31786	0.01	0.58	0.16393	FALSE
SARS2_nsp2_E63K_E66K	EPRS1	P07814	1|1|1	0|0|1|1|2|1|1|1|0|0|2|8|9|3|2|6|9	1	0.37	0.321232	0	0.71	0.160616	FALSE
SARS2_nsp2_E63K_E66K	HSP90AA1	P07900	3|2|4	0|0|0|1|0|0|0|1|0|0|0|1|1|0|0|0|1	3	10.2	0.36847	0.88	0.01	0.624235	FALSE
SARS2_nsp2_E63K_E66K	HNRNPC	P07910	6|5|8	0|7|7|3|0|0|1|0|6|0|0|1|0|0|2|0|0	6.33	3.99	0.357655	0.66	0.04	0.508827	FALSE
SARS2_nsp2_E63K_E66K	UQCRH	P07919	0|2|2	0|0|0|0|1|0|0|0|0|0|0|0|0|1|1|2|1	1.33	3.78	0.267652	0.45	0.14	0.358826	FALSE
SARS2_nsp2_E63K_E66K	SLC3A2	P08195	2|2|1	0|0|0|0|0|0|0|0|0|0|0|0|0|0|0|0|0	1.67	16.67	0.307687	0.64	0.08	0.473844	FALSE
SARS2_nsp2_E63K_E66K	HSP90AB1	P08238	4|3|2	1|1|0|2|1|1|1|0|1|0|0|2|1|1|2|2|2	3	2.83	0.326036	0.38	0.15	0.353018	FALSE
SARS2_nsp2_E63K_E66K	CYC1	P08574	0|1|1	0|0|0|0|0|0|0|0|0|0|0|0|0|0|0|0|0	0.67	6.67	0.216276	0	0.71	0.108138	FALSE
SARS2_nsp2_E63K_E66K	SNRPB2	P08579	4|3|4	0|1|1|1|1|0|1|1|1|0|0|1|2|0|1|0|0	3.67	5.67	0.35944	0.81	0.02	0.58472	FALSE
SARS2_nsp2_E63K_E66K	SNRNP70	P08621	4|5|4	0|1|0|9|0|0|0|0|0|0|0|3|3|0|7|1|0	4.33	3.07	0.458083	0.52	0.12	0.489041	FALSE
SARS2_nsp2_E63K_E66K	VIM	P08670	1|1|2	1|12|12|16|0|0|1|0|8|0|0|1|1|1|13|1|1	1.33	0.33	0.293895	0	0.71	0.146947	FALSE
SARS2_nsp2_E63K_E66K	RPS17	P08708	14|18|17	15|13|13|16|12|9|7|12|14|8|6|16|17|14|18|13|11	16.33	1.3	0.324411	0	0.7	0.162206	FALSE
SARS2_nsp2_E63K_E66K	RPSA	P08865	6|6|5	7|3|6|10|3|4|4|7|6|6|4|3|8|4|6|9|6	5.67	1	0.32188	0	0.68	0.16094	FALSE
SARS2_nsp2_E63K_E66K	SNRPA	P09012	5|2|1	0|0|1|3|0|0|0|0|0|0|0|1|1|1|3|1|0	2.67	4.12	0.43068	0.44	0.14	0.43534	FALSE
SARS2_nsp2_E63K_E66K	SRP19	P09132	0|1|0	0|0|0|0|0|0|0|0|0|0|0|0|0|0|0|0|0	0.33	3.33	0.0129347	0	0.71	0.00646736	FALSE
SARS2_nsp2_E63K_E66K	SNRPC	P09234	1|2|0	0|0|2|1|0|0|0|0|0|0|0|1|2|0|2|1|1	1	1.7	0.235546	0.14	0.42	0.187773	FALSE
SARS2_nsp2_E63K_E66K	HMGB1	P09429	15|11|14	12|10|7|18|12|5|7|4|11|7|7|9|12|12|13|13|10	13.33	1.34	0.323076	0	0.69	0.161538	FALSE
SARS2_nsp2_E63K_E66K	HNRNPA1	P09651	12|9|8	3|7|7|7|0|1|0|1|6|0|0|1|1|0|5|0|1	9.67	4.11	0.358666	0.73	0.02	0.544333	FALSE
SARS2_nsp2_E63K_E66K	SNRPA1	P09661	6|6|2	0|2|1|2|1|1|1|1|1|1|2|3|2|3|3|2|1	4.67	2.94	0.373126	0.55	0.12	0.461563	FALSE
SARS2_nsp2_E63K_E66K	COX6C	P09669	3|2|5	0|0|0|0|0|0|0|0|0|0|0|0|0|0|0|0|0	3.33	33.33	0.370559	0.98	0	0.67528	FALSE
SARS2_nsp2_E63K_E66K	PARP1	P09874	60|63|53	31|42|33|61|47|31|14|30|32|34|29|61|56|49|61|55|51	58.67	1.39	0.327808	0	0.71	0.163904	FALSE
SARS2_nsp2_E63K_E66K	POLR1D	P0DPB5	0|2|1	1|0|0|1|1|1|1|1|1|0|0|3|3|0|1|3|1	1	0.94	0.203229	0.04	0.5	0.121615	FALSE
SARS2_nsp2_E63K_E66K	H1-4	P10412	5|5|8	0|1|4|0|0|0|0|0|3|0|0|1|1|0|3|0|0	6	7.85	0.394669	0.89	0.01	0.642334	FALSE
SARS2_nsp2_E63K_E66K	TXN	P10599	8|7|10	8|7|12|8|10|5|7|8|10|5|9|13|11|8|10|11|10	8.33	0.93	0.316163	0	0.7	0.158081	FALSE
SARS2_nsp2_E63K_E66K	COX5B	P10606	3|3|4	0|0|0|0|0|0|0|0|0|0|0|0|0|0|0|0|0	3.33	33.33	0.4372	0.99	0	0.7136	FALSE
SARS2_nsp2_E63K_E66K	MAPT	P10636	0|1|0	0|0|0|0|0|0|0|0|0|0|0|1|0|0|0|0|0	0.33	3.33	0.474264	0	0.71	0.237132	FALSE
SARS2_nsp2_E63K_E66K	HSPD1	P10809	11|10|11	12|8|8|3|5|4|6|6|13|12|12|21|15|13|9|13|14	10.67	1.04	0.319434	0	0.7	0.159717	FALSE
SARS2_nsp2_E63K_E66K	HSPA5	P11021	44|49|45	15|11|10|11|12|10|12|7|11|12|10|14|13|8|14|13|15	46	3.95	0.333176	1	0	0.666588	FALSE
SARS2_nsp2_E63K_E66K	HSPA8	P11142	26|30|29	22|15|22|24|23|9|12|19|21|11|14|16|18|17|26|29|30	28.33	1.47	0.319834	0	0.71	0.159917	FALSE
SARS2_nsp2_E63K_E66K	LAMP1	P11279	1|0|1	0|0|0|0|0|0|0|0|0|0|0|0|0|0|0|0|0	0.67	6.67	0.276089	0	0.71	0.138045	FALSE
SARS2_nsp2_E63K_E66K	TOP1	P11387	22|22|26	11|12|16|13|12|10|10|7|10|5|8|11|11|9|14|11|10	23.33	2.2	0.336276	0.04	0.52	0.188138	FALSE
SARS2_nsp2_E63K_E66K	TOP2A	P11388	1|0|1	0|0|0|1|0|0|0|0|0|0|0|0|0|0|0|0|0	0.67	6.67	0.242702	0	0.71	0.121351	FALSE
SARS2_nsp2_E63K_E66K	PC	P11498	67|72|70	88|80|55|48|44|63|67|42|86|64|68|74|82|75|53|47|53	69.67	1.09	0.3236	0	0.71	0.1618	FALSE
SARS2_nsp2_E63K_E66K	MTHFD1	P11586	2|4|3	8|3|8|9|2|2|2|2|7|7|5|10|7|7|8|7|2	3	0.53	0.305814	0	0.71	0.152907	FALSE
SARS2_nsp2_E63K_E66K	PABPC1	P11940	5|6|6	0|0|0|0|0|0|0|0|0|0|0|0|0|0|0|0|0	5.67	56.67	0.452991	1	0	0.726495	FALSE
SARS2_nsp2_E63K_E66K	SLC25A6	P12236	2|2|2	2|2|2|2|2|1|1|2|1|1|2|2|1|1|3|2|2	2	1.17	0.316028	0.02	0.55	0.168014	FALSE
SARS2_nsp2_E63K_E66K	TPR	P12270	1|1|2	1|1|0|0|2|1|1|1|1|1|1|1|0|0|1|0|1	1.33	1.74	0.31322	0.1	0.45	0.20661	FALSE
SARS2_nsp2_E63K_E66K	XRCC6	P12956	6|8|9	0|7|2|5|0|1|0|0|1|0|0|0|0|0|2|0|0	7.67	7.24	0.437132	0.88	0.01	0.658566	FALSE
SARS2_nsp2_E63K_E66K	XRCC5	P13010	7|9|10	0|6|0|3|0|0|0|0|0|0|0|0|0|0|0|0|0	8.67	16.37	0.478452	0.97	0	0.724226	FALSE
SARS2_nsp2_E63K_E66K	COX4I1	P13073	3|4|1	0|0|0|0|0|0|0|0|0|0|0|0|0|0|0|0|0	2.67	26.67	0.337496	0.66	0.04	0.498748	FALSE
SARS2_nsp2_E63K_E66K	EEF2	P13639	9|10|9	13|14|8|10|8|3|7|9|8|3|6|13|14|13|10|18|10	9.33	0.95	0.322255	0	0.7	0.161128	FALSE
SARS2_nsp2_E63K_E66K	PLS3	P13797	2|0|1	3|2|3|1|2|2|1|1|3|3|2|1|2|3|1|1|1	1	0.53	0.187609	0	0.61	0.0938044	FALSE
SARS2_nsp2_E63K_E66K	MTHFD2	P13995	1|2|1	0|0|0|0|1|0|0|0|0|0|0|0|0|1|1|1|1	1.33	4.53	0.308176	0.24	0.34	0.274088	FALSE
SARS2_nsp2_E63K_E66K	MIF	P14174	1|1|1	3|3|1|2|2|3|4|1|2|1|2|1|2|2|0|0|1	1	0.57	0.316406	0	0.71	0.158203	FALSE
SARS2_nsp2_E63K_E66K	COX7A2	P14406	2|2|2	0|0|0|0|0|0|0|0|0|0|0|0|0|0|0|0|0	2	20	0.479726	0.95	0.01	0.714863	FALSE
[truncated: 4,591 more rows]

## Sheet: APMS_DDA_HighConfidence
Bait	Prey_Gene	Prey_Uniprot	SpectralCounts_Exp	SpectralCounts_Control	AvgSpec	FoldChange_Exp/Control	MIST	SaintScore	BFDR	InteractionScore	HighConfidence
nsp2_nature	SLC27A2	O14975	6|6|2	0|0|0|0|0|0|0|0|0|0|0|0|0|0|0|0|0	4.67	46.67	0.915768	0.98	0	0.947884	TRUE
nsp2_nature	EIF4E2	O60573	10|9|12	0|0|0|0|0|0|0|0|0|0|0|0|0|0|0|0|0	10.33	103.33	0.806946	1	0	0.903473	TRUE
nsp2_nature	POR	P16435	3|3|4	0|0|0|0|0|0|0|0|0|0|0|0|0|0|0|0|0	3.33	33.33	0.711331	0.99	0	0.850665	TRUE
nsp2_nature	RAP1GDS1	P52306	11|12|13	0|0|0|0|0|0|0|0|0|0|0|0|0|0|0|0|0	12	120	0.991627	1	0	0.995814	TRUE
nsp2_nature	WASHC4	Q2M389	2|4|5	0|0|0|0|0|0|0|0|0|0|0|0|0|0|0|0|0	3.67	36.67	0.972084	0.98	0	0.976042	TRUE
nsp2_nature	FKBP15	Q5T1M5	16|19|24	0|0|0|0|0|0|0|0|0|0|0|0|0|0|0|0|0	19.67	196.67	0.988034	1	0	0.994017	TRUE
nsp2_nature	GIGYF2	Q6Y7W6	46|32|43	0|0|0|0|0|0|0|0|0|0|0|0|0|0|0|0|0	40.33	403.33	0.767088	1	0	0.883544	TRUE
nsp2_nature	NA	SARS_CoV_2_nsp2	133|150|153	0|0|0|0|0|0|0|0|0|6|1|0|0|0|0|0|0	145.33	352.95	0.891414	1	0	0.945707	TRUE
SARS2_nsp2_D23Y_R27C	SLC27A2	O14975	5|3|2	0|0|0|0|0|0|0|0|0|0|0|0|0|0|0|0|0	3.33	33.33	0.916035	0.98	0	0.948017	TRUE
SARS2_nsp2_D23Y_R27C	EIF4E2	O60573	13|7|6	0|0|0|0|0|0|0|0|0|0|0|0|0|0|0|0|0	8.67	86.67	0.781604	1	0	0.890802	TRUE
SARS2_nsp2_D23Y_R27C	LMNA	P02545	9|12|14	0|0|1|1|0|0|0|0|1|0|0|2|1|1|1|1|1	11.67	19.83	0.808166	1	0	0.904083	TRUE
SARS2_nsp2_D23Y_R27C	POR	P16435	5|3|6	0|0|0|0|0|0|0|0|0|0|0|0|0|0|0|0|0	4.67	46.67	0.768148	1	0	0.884074	TRUE
SARS2_nsp2_D23Y_R27C	FASN	P49327	15|13|14	0|0|0|1|0|0|0|0|0|0|0|2|4|2|1|4|4	14	13.22	0.617464	1	0	0.808732	TRUE
SARS2_nsp2_D23Y_R27C	RAP1GDS1	P52306	15|9|10	0|0|0|0|0|0|0|0|0|0|0|0|0|0|0|0|0	11.33	113.33	0.990855	1	0	0.995427	TRUE
SARS2_nsp2_D23Y_R27C	ACLY	P53396	4|1|2	0|0|0|0|0|0|0|0|0|0|0|0|0|0|0|0|0	2.33	23.33	0.833944	0.65	0.05	0.741972	TRUE
SARS2_nsp2_D23Y_R27C	LMNB2	Q03252	13|15|16	0|1|1|1|0|0|0|0|1|0|0|0|0|0|0|0|0	14.67	62.33	0.625374	1	0	0.812687	TRUE
SARS2_nsp2_D23Y_R27C	WASHC5	Q12768	4|4|4	0|0|0|0|0|0|0|0|0|0|0|0|0|0|0|0|0	4	40	0.993296	1	0	0.996648	TRUE
SARS2_nsp2_D23Y_R27C	WASHC4	Q2M389	6|3|6	0|0|0|0|0|0|0|0|0|0|0|0|0|0|0|0|0	5	50	0.983311	1	0	0.991655	TRUE
SARS2_nsp2_D23Y_R27C	FKBP15	Q5T1M5	32|36|26	0|0|0|0|0|0|0|0|0|0|0|0|0|0|0|0|0	31.33	313.33	0.991062	1	0	0.995531	TRUE
SARS2_nsp2_D23Y_R27C	GIGYF2	Q6Y7W6	44|26|28	0|0|0|0|0|0|0|0|0|0|0|0|0|0|0|0|0	32.67	326.67	0.742268	1	0	0.871134	TRUE
SARS2_nsp2_D23Y_R27C	ZNF598	Q86UK7	22|13|19	2|0|0|1|0|0|0|0|0|1|0|3|3|5|0|1|1	18	18	0.611886	1	0	0.805943	TRUE
SARS2_nsp2_D23Y_R27C	VRK3	Q8IV63	2|4|2	0|0|0|0|0|0|0|0|0|0|0|0|0|0|0|0|0	2.67	26.67	0.973284	0.97	0	0.971642	TRUE
SARS2_nsp2_D23Y_R27C	LEMD2	Q8NC56	5|1|6	0|0|0|0|0|0|0|0|0|0|0|0|0|0|0|0|0	4	40	0.793785	0.67	0.03	0.731893	TRUE
SARS2_nsp2_D23Y_R27C	NA	SARS_CoV_2_nsp2	158|142|141	0|0|0|0|0|0|0|0|0|6|1|0|0|0|0|0|0	147	357	0.900518	1	0	0.950259	TRUE
SARS2_nsp2_E63K_E66K	SLC27A2	O14975	3|3|3	0|0|0|0|0|0|0|0|0|0|0|0|0|0|0|0|0	3	30	0.876118	0.99	0	0.933059	TRUE
SARS2_nsp2_E63K_E66K	CD3EAP	O15446	4|3|2	0|0|0|0|0|0|0|0|0|0|0|0|0|0|0|0|0	3	30	0.793413	0.98	0	0.886706	TRUE
SARS2_nsp2_E63K_E66K	EIF4E2	O60573	7|7|7	0|0|0|0|0|0|0|0|0|0|0|0|0|0|0|0|0	7	70	0.665319	1	0	0.83266	TRUE
SARS2_nsp2_E63K_E66K	NSA2	O95478	4|5|4	0|0|0|0|0|0|0|0|0|0|0|0|0|0|0|0|0	4.33	43.33	0.651049	1	0	0.825525	TRUE
SARS2_nsp2_E63K_E66K	NSD2	O96028	3|2|2	0|0|0|0|0|0|0|0|0|0|0|0|0|0|0|0|0	2.33	23.33	0.647356	0.97	0.01	0.808678	TRUE
SARS2_nsp2_E63K_E66K	JUP	P14923	1|3|4	0|0|0|0|0|0|0|0|0|0|0|0|0|0|0|1|0	2.67	26.67	0.643084	0.66	0.04	0.651542	TRUE
SARS2_nsp2_E63K_E66K	RFC1	P35251	5|6|11	0|0|0|0|0|0|0|0|0|0|0|0|0|0|0|0|0	7.33	73.33	0.801085	1	0	0.900543	TRUE
SARS2_nsp2_E63K_E66K	COIL	P38432	1|2|4	0|0|0|0|0|0|0|0|0|0|0|0|1|0|0|0|0	2.33	23.33	0.64245	0.65	0.05	0.646225	TRUE
SARS2_nsp2_E63K_E66K	MTREX	P42285	4|4|5	0|0|0|0|0|0|0|0|0|0|0|0|0|0|1|0|0	4.33	43.33	0.713661	1	0	0.856831	TRUE
SARS2_nsp2_E63K_E66K	MKI67	P46013	35|28|27	0|0|0|0|0|0|0|0|0|0|0|0|0|0|0|0|0	30	300	0.73707	1	0	0.868535	TRUE
SARS2_nsp2_E63K_E66K	FASN	P49327	23|25|25	0|0|0|1|0|0|0|0|0|0|0|2|4|2|1|4|4	24.33	22.98	0.609801	1	0	0.8049	TRUE
SARS2_nsp2_E63K_E66K	MCM2	P49736	7|6|4	0|0|0|0|0|0|0|0|0|0|0|0|0|0|0|0|0	5.67	56.67	0.987811	1	0	0.993906	TRUE
SARS2_nsp2_E63K_E66K	RAP1GDS1	P52306	14|12|10	0|0|0|0|0|0|0|0|0|0|0|0|0|0|0|0|0	12	120	0.991977	1	0	0.995989	TRUE
SARS2_nsp2_E63K_E66K	ACLY	P53396	5|4|8	0|0|0|0|0|0|0|0|0|0|0|0|0|0|0|0|0	5.67	56.67	0.882334	1	0	0.941167	TRUE
SARS2_nsp2_E63K_E66K	NOP14	P78316	5|4|2	0|0|0|0|0|0|0|0|0|0|0|0|0|0|0|0|0	3.67	36.67	0.848049	0.98	0	0.914024	TRUE
SARS2_nsp2_E63K_E66K	MRPS35	P82673	3|3|3	0|0|0|0|0|0|0|0|0|0|0|0|0|0|0|0|0	3	30	0.803122	0.99	0	0.896561	TRUE
SARS2_nsp2_E63K_E66K	MRPS9	P82933	3|2|3	0|0|0|0|0|0|0|0|0|0|0|0|0|0|0|0|0	2.67	26.67	0.618735	0.98	0	0.799367	TRUE
SARS2_nsp2_E63K_E66K	LACTB	P83111	2|2|3	0|0|0|0|0|0|0|0|0|0|0|0|0|0|0|0|0	2.33	23.33	0.712139	0.97	0.01	0.841069	TRUE
SARS2_nsp2_E63K_E66K	EXOSC9	Q06265	2|2|2	0|0|0|0|0|0|0|0|0|0|0|0|0|0|0|0|0	2	20	0.622302	0.95	0.01	0.786151	TRUE
SARS2_nsp2_E63K_E66K	TBL3	Q12788	6|7|10	0|0|0|0|0|0|0|0|0|0|0|0|0|0|0|0|0	7.67	76.67	0.624449	1	0	0.812224	TRUE
SARS2_nsp2_E63K_E66K	EXOSC2	Q13868	7|7|6	0|0|0|0|0|0|0|0|0|0|0|0|0|0|0|0|0	6.67	66.67	0.635518	1	0	0.817759	TRUE
SARS2_nsp2_E63K_E66K	MCM6	Q14566	5|4|4	0|0|0|0|0|0|0|0|0|0|0|0|0|0|0|0|0	4.33	43.33	0.992772	1	0	0.996386	TRUE
SARS2_nsp2_E63K_E66K	NUMA1	Q14980	28|29|21	0|0|0|0|0|0|0|0|0|0|0|0|0|0|0|0|0	26	260	0.655625	1	0	0.827813	TRUE
SARS2_nsp2_E63K_E66K	EXOSC7	Q15024	6|5|3	0|0|0|0|0|0|0|0|0|0|0|0|0|0|0|0|0	4.67	46.67	0.601141	1	0	0.80057	TRUE
SARS2_nsp2_E63K_E66K	RRS1	Q15050	12|11|11	0|0|0|0|0|0|0|0|0|0|0|0|0|0|0|0|0	11.33	113.33	0.643786	1	0	0.821893	TRUE
SARS2_nsp2_E63K_E66K	PWP2	Q15269	5|5|5	0|0|0|0|0|0|0|0|0|0|0|0|0|0|0|0|0	5	50	0.687326	1	0	0.843663	TRUE
SARS2_nsp2_E63K_E66K	TTF1	Q15361	3|0|4	0|0|0|0|0|0|0|0|0|0|0|0|0|0|0|0|0	2.33	23.33	0.876507	0.66	0.04	0.768254	TRUE
SARS2_nsp2_E63K_E66K	KNOP1	Q1ED39	8|6|11	0|0|0|0|0|0|0|0|0|0|0|0|0|0|0|0|0	8.33	83.33	0.608366	1	0	0.804183	TRUE
SARS2_nsp2_E63K_E66K	EXOSC6	Q5RKV6	3|5|3	0|0|0|0|0|0|0|0|0|0|0|0|0|0|0|0|0	3.67	36.67	0.607702	0.99	0	0.798851	TRUE
SARS2_nsp2_E63K_E66K	SPTY2D1	Q68D10	1|3|3	0|0|0|0|0|0|0|0|0|0|0|0|0|0|0|0|0	2.33	23.33	0.834336	0.66	0.04	0.747168	TRUE
SARS2_nsp2_E63K_E66K	MSL1	Q68DK7	6|5|4	0|0|0|0|0|0|0|0|0|0|0|0|0|0|0|0|0	5	50	0.990927	1	0	0.995463	TRUE
SARS2_nsp2_E63K_E66K	RPL7L1	Q6DKI1	2|2|2	0|0|0|0|0|0|0|0|0|0|0|0|0|0|0|0|0	2	20	0.692268	0.95	0.01	0.821134	TRUE
SARS2_nsp2_E63K_E66K	GIGYF2	Q6Y7W6	26|23|27	0|0|0|0|0|0|0|0|0|0|0|0|0|0|0|0|0	25.33	253.33	0.60455	1	0	0.802275	TRUE
SARS2_nsp2_E63K_E66K	NOL8	Q76FK4	4|1|2	0|0|0|0|0|0|0|0|0|0|0|0|0|0|0|0|0	2.33	23.33	0.609209	0.65	0.05	0.629604	TRUE
SARS2_nsp2_E63K_E66K	TRMT1L	Q7Z2T5	8|10|7	0|0|0|0|0|0|0|0|0|0|0|0|0|0|0|0|0	8.33	83.33	0.634373	1	0	0.817187	TRUE
SARS2_nsp2_E63K_E66K	ZC3HAV1	Q7Z2W4	31|29|29	0|0|0|0|0|0|0|0|0|0|0|0|0|0|0|0|0	29.67	296.67	0.685698	1	0	0.842849	TRUE
SARS2_nsp2_E63K_E66K	MTDH	Q86UE4	8|8|8	0|0|0|0|0|1|0|0|0|0|0|2|1|0|1|0|0	8	27.2	0.648317	1	0	0.824159	TRUE
SARS2_nsp2_E63K_E66K	SUGP2	Q8IX01	7|4|6	0|0|0|0|0|0|0|0|0|0|0|0|0|0|0|0|0	5.67	56.67	0.82703	1	0	0.913515	TRUE
SARS2_nsp2_E63K_E66K	PELP1	Q8IZL8	5|5|4	0|0|0|0|0|0|0|0|0|0|0|0|0|0|0|0|0	4.67	46.67	0.992926	1	0	0.996463	TRUE
SARS2_nsp2_E63K_E66K	DDX51	Q8N8A6	10|12|7	0|0|0|0|0|0|0|0|0|0|0|0|0|0|0|0|0	9.67	96.67	0.660057	1	0	0.830029	TRUE
SARS2_nsp2_E63K_E66K	KRI1	Q8N9T8	7|8|7	0|0|0|0|0|0|0|0|0|0|0|0|0|0|0|0|0	7.33	73.33	0.620159	1	0	0.810079	TRUE
SARS2_nsp2_E63K_E66K	DDX55	Q8NHQ9	1|3|5	0|0|0|0|0|0|0|0|0|0|0|0|0|0|0|0|0	3	30	0.677219	0.66	0.04	0.668609	TRUE
SARS2_nsp2_E63K_E66K	EXOSC8	Q96B26	4|5|6	0|0|0|0|0|0|0|0|0|0|0|0|0|0|0|0|0	5	50	0.670925	1	0	0.835463	TRUE
SARS2_nsp2_E63K_E66K	ZFR	Q96KR1	5|4|5	0|0|0|0|0|0|0|0|0|0|0|0|0|0|0|0|0	4.67	46.67	0.605215	1	0	0.802607	TRUE
SARS2_nsp2_E63K_E66K	ZNF512	Q96ME7	11|10|11	0|0|0|0|0|0|0|0|0|0|0|0|0|0|0|0|0	10.67	106.67	0.609604	1	0	0.804802	TRUE
SARS2_nsp2_E63K_E66K	SRPK1	Q96SB4	3|4|4	0|0|0|0|0|0|0|0|0|0|0|1|0|0|0|0|0	3.67	36.67	0.648323	1	0	0.824162	TRUE
SARS2_nsp2_E63K_E66K	RNF2	Q99496	4|2|3	0|0|0|0|0|0|0|0|0|0|0|0|0|1|0|0|0	3	30	0.791955	0.98	0	0.885978	TRUE
SARS2_nsp2_E63K_E66K	DDX50	Q9BQ39	17|16|18	0|0|0|0|0|0|0|0|0|0|0|0|0|0|0|0|0	17	170	0.645349	1	0	0.822674	TRUE
SARS2_nsp2_E63K_E66K	NOL10	Q9BSC4	12|7|7	0|0|0|0|0|0|0|0|0|0|0|0|0|0|0|0|0	8.67	86.67	0.6201	1	0	0.81005	TRUE
SARS2_nsp2_E63K_E66K	WDR18	Q9BV38	4|3|5	0|0|0|0|0|0|0|0|0|0|0|0|0|0|0|0|0	4	40	0.987522	1	0	0.993761	TRUE
SARS2_nsp2_E63K_E66K	RBM4	Q9BWF3	2|2|2	0|0|0|0|0|0|0|0|0|0|0|0|0|0|0|0|0	2	20	0.620615	0.95	0.01	0.785307	TRUE
SARS2_nsp2_E63K_E66K	DDX24	Q9GZR7	13|14|10	0|0|0|0|0|0|0|0|0|0|0|0|0|0|0|0|0	12.33	123.33	0.61221	1	0	0.806105	TRUE
SARS2_nsp2_E63K_E66K	SENP3	Q9H4L4	3|3|2	0|0|0|0|0|0|0|0|0|0|0|0|0|0|0|0|0	2.67	26.67	0.724043	0.98	0	0.852021	TRUE
SARS2_nsp2_E63K_E66K	NOL6	Q9H6R4	13|7|10	0|0|0|0|0|0|0|0|0|0|0|0|0|0|0|0|0	10	100	0.696968	1	0	0.848484	TRUE
SARS2_nsp2_E63K_E66K	RPF2	Q9H7B2	7|7|8	0|1|0|0|0|0|0|0|0|0|0|0|0|0|0|0|0	7.33	73.33	0.630488	1	0	0.815244	TRUE
SARS2_nsp2_E63K_E66K	SCAF1	Q9H7N4	2|3|4	0|0|0|0|0|0|0|0|0|0|0|0|0|0|0|0|0	3	30	0.982289	0.98	0	0.981145	TRUE
SARS2_nsp2_E63K_E66K	KAT8	Q9H7Z6	8|3|4	0|0|0|0|0|0|0|0|0|0|0|0|0|0|0|0|0	5	50	0.970392	1	0	0.985196	TRUE
SARS2_nsp2_E63K_E66K	MSL2	Q9HCI7	4|3|1	0|0|0|0|0|0|0|0|0|0|0|0|0|0|0|0|0	2.67	26.67	0.960591	0.66	0.04	0.810296	TRUE
SARS2_nsp2_E63K_E66K	EXOSC5	Q9NQT4	3|4|3	0|0|0|0|0|0|0|0|0|0|0|0|0|0|0|0|0	3.33	33.33	0.60505	0.99	0	0.797525	TRUE
SARS2_nsp2_E63K_E66K	RRBP1	Q9P2E9	7|7|7	0|0|0|0|0|0|0|0|0|0|0|0|0|0|0|0|0	7	70	0.994008	1	0	0.997004	TRUE
SARS2_nsp2_E63K_E66K	WDR3	Q9UNX4	8|5|4	0|0|0|0|0|0|0|0|0|0|0|0|0|0|0|0|0	5.67	56.67	0.821956	1	0	0.910978	TRUE
SARS2_nsp2_E63K_E66K	MRPS7	Q9Y2R9	4|3|2	0|0|0|0|0|0|0|0|0|0|0|0|0|1|0|0|0	3	30	0.611333	0.98	0	0.795667	TRUE
SARS2_nsp2_E63K_E66K	RRP7A	Q9Y3A4	4|2|2	0|0|0|0|0|0|0|0|0|0|0|0|0|0|0|0|0	2.67	26.67	0.723761	0.97	0	0.84688	TRUE
SARS2_nsp2_E63K_E66K	EXOSC1	Q9Y3B2	5|3|4	0|0|0|0|0|0|0|0|0|0|0|0|0|0|0|0|0	4	40	0.685276	1	0	0.842638	TRUE
SARS2_nsp2_E63K_E66K	LAS1L	Q9Y4W2	5|5|4	0|0|0|0|0|0|0|0|0|0|0|0|0|0|0|0|0	4.67	46.67	0.722855	1	0	0.861428	TRUE
SARS2_nsp2_E63K_E66K	PRRC2C	Q9Y520	6|4|5	0|0|0|0|0|0|0|0|0|0|0|0|0|0|0|0|0	5	50	0.684091	1	0	0.842046	TRUE
SARS2_nsp2_E63K_E66K	UTP18	Q9Y5J1	5|2|4	0|1|0|0|0|0|0|0|0|0|0|0|0|0|0|0|0	3.67	36.67	0.63487	0.98	0	0.807435	TRUE
SARS2_nsp2_E63K_E66K	NA	SARS_CoV_2_nsp2	151|141|140	0|0|0|0|0|0|0|0|0|6|1|0|0|0|0|0|0	144	349.71	0.838513	1	0	0.919256	TRUE
SARS2_nsp2_G262V_G265V	SLC27A2	O14975	2|4|5	0|0|0|0|0|0|0|0|0|0|0|0|0|0|0|0|0	3.67	36.67	0.906587	0.98	0	0.943293	TRUE
SARS2_nsp2_G262V_G265V	LMNA	P02545	12|13|25	0|0|1|1|0|0|0|0|1|0|0|2|1|1|1|1|1	16.67	28.33	0.823506	1	0	0.911753	TRUE
SARS2_nsp2_G262V_G265V	JUP	P14923	0|8|2	0|0|0|0|0|0|0|0|0|0|0|0|0|0|0|1|0	3.33	33.33	0.628421	0.65	0.05	0.639211	TRUE
SARS2_nsp2_G262V_G265V	POR	P16435	3|6|5	0|0|0|0|0|0|0|0|0|0|0|0|0|0|0|0|0	4.67	46.67	0.747648	1	0	0.873824	TRUE
SARS2_nsp2_G262V_G265V	UQCRC1	P31930	7|6|5	0|0|0|0|0|0|0|0|0|0|0|0|0|0|0|1|1	6	51	0.626785	1	0	0.813393	TRUE
SARS2_nsp2_G262V_G265V	FASN	P49327	14|31|34	0|0|0|1|0|0|0|0|0|0|0|2|4|2|1|4|4	26.33	24.87	0.684898	1	0	0.842449	TRUE
SARS2_nsp2_G262V_G265V	RAP1GDS1	P52306	13|20|21	0|0|0|0|0|0|0|0|0|0|0|0|0|0|0|0|0	18	180	0.984244	1	0	0.992122	TRUE
SARS2_nsp2_G262V_G265V	ACLY	P53396	1|6|5	0|0|0|0|0|0|0|0|0|0|0|0|0|0|0|0|0	4	40	0.852268	0.67	0.03	0.761134	TRUE
SARS2_nsp2_G262V_G265V	LMNB2	Q03252	19|16|30	0|1|1|1|0|0|0|0|1|0|0|0|0|0|0|0|0	21.67	92.08	0.660152	1	0	0.830076	TRUE
SARS2_nsp2_G262V_G265V	WASHC5	Q12768	2|2|3	0|0|0|0|0|0|0|0|0|0|0|0|0|0|0|0|0	2.33	23.33	0.985533	0.97	0.01	0.977766	TRUE
SARS2_nsp2_G262V_G265V	SEPTIN7	Q16181	3|3|3	0|0|0|0|0|0|0|0|0|0|0|0|2|0|1|2|2	3	7.29	0.820888	0.81	0.02	0.815444	TRUE
SARS2_nsp2_G262V_G265V	WASHC4	Q2M389	3|5|5	0|0|0|0|0|0|0|0|0|0|0|0|0|0|0|0|0	4.33	43.33	0.982705	1	0	0.991353	TRUE
SARS2_nsp2_G262V_G265V	FKBP15	Q5T1M5	16|27|26	0|0|0|0|0|0|0|0|0|0|0|0|0|0|0|0|0	23	230	0.982897	1	0	0.991448	TRUE
SARS2_nsp2_G262V_G265V	VRK3	Q8IV63	4|6|10	0|0|0|0|0|0|0|0|0|0|0|0|0|0|0|0|0	6.67	66.67	0.969018	1	0	0.984509	TRUE
SARS2_nsp2_G262V_G265V	LEMD2	Q8NC56	3|4|8	0|0|0|0|0|0|0|0|0|0|0|0|0|0|0|0|0	5	50	0.828014	1	0	0.914007	TRUE
SARS2_nsp2_G262V_G265V	TFG	Q92734	4|4|4	0|0|0|0|0|0|0|0|0|0|0|1|0|1|2|8|1	4	5.23	0.645749	0.76	0.02	0.702875	TRUE
SARS2_nsp2_G262V_G265V	NA	SARS_CoV_2_nsp2	162|171|181	0|0|0|0|0|0|0|0|0|6|1|0|0|0|0|0|0	171.33	416.1	0.901324	1	0	0.950662	TRUE
SARS2_nsp2_K330D_K337D	SLC27A2	O14975	6|4|5	0|0|0|0|0|0|0|0|0|0|0|0|0|0|0|0|0	5	50	0.950552	1	0	0.975276	TRUE
SARS2_nsp2_K330D_K337D	LMNA	P02545	6|9|13	0|0|1|1|0|0|0|0|1|0|0|2|1|1|1|1|1	9.33	15.87	0.777559	1	0	0.888779	TRUE
SARS2_nsp2_K330D_K337D	COX6B1	P14854	2|2|3	0|0|0|0|0|0|0|0|0|0|0|0|0|0|0|0|0	2.33	23.33	0.98424	0.97	0.01	0.97712	TRUE
SARS2_nsp2_K330D_K337D	JUP	P14923	20|0|5	0|0|0|0|0|0|0|0|0|0|0|0|0|0|0|1|0	8.33	83.33	0.748786	0.67	0.03	0.709393	TRUE
SARS2_nsp2_K330D_K337D	RAP1GDS1	P52306	16|15|11	0|0|0|0|0|0|0|0|0|0|0|0|0|0|0|0|0	14	140	0.992543	1	0	0.996272	TRUE
SARS2_nsp2_K330D_K337D	DSG1	Q02413	18|0|5	0|0|0|0|0|0|0|0|0|0|0|0|0|0|0|3|0	7.67	43.44	0.80868	0.66	0.05	0.73434	TRUE
SARS2_nsp2_K330D_K337D	LMNB2	Q03252	11|12|13	0|1|1|1|0|0|0|0|1|0|0|0|0|0|0|0|0	12	51	0.604085	1	0	0.802042	TRUE
SARS2_nsp2_K330D_K337D	WASHC5	Q12768	1|2|6	0|0|0|0|0|0|0|0|0|0|0|0|0|0|0|0|0	3	30	0.913377	0.65	0.05	0.781689	TRUE
SARS2_nsp2_K330D_K337D	FKBP15	Q5T1M5	7|12|13	0|0|0|0|0|0|0|0|0|0|0|0|0|0|0|0|0	10.67	106.67	0.979672	1	0	0.989836	TRUE
SARS2_nsp2_K330D_K337D	GIGYF2	Q6Y7W6	13|12|13	0|0|0|0|0|0|0|0|0|0|0|0|0|0|0|0|0	12.67	126.67	0.601179	1	0	0.80059	TRUE
SARS2_nsp2_K330D_K337D	VRK3	Q8IV63	3|4|4	0|0|0|0|0|0|0|0|0|0|0|0|0|0|0|0|0	3.67	36.67	0.988381	1	0	0.99419	TRUE
SARS2_nsp2_K330D_K337D	LEMD2	Q8NC56	1|3|4	0|0|0|0|0|0|0|0|0|0|0|0|0|0|0|0|0	2.67	26.67	0.766276	0.66	0.04	0.713138	TRUE
SARS2_nsp2_K330D_K337D	KAT8	Q9H7Z6	3|2|2	0|0|0|0|0|0|0|0|0|0|0|0|0|0|0|0|0	2.33	23.33	0.992008	0.97	0.01	0.981004	TRUE
SARS2_nsp2_K330D_K337D	CALML5	Q9NZT1	5|0|4	0|0|0|0|0|0|0|0|0|0|0|0|0|0|0|1|1	3	25.5	0.680154	0.67	0.03	0.675077	TRUE
SARS2_nsp2_K330D_K337D	NA	SARS_CoV_2_nsp2	149|153|149	0|0|0|0|0|0|0|0|0|6|1|0|0|0|0|0|0	150.33	365.1	0.90747	1	0	0.953735	TRUE
SARS2_nsp2_T85I	EIF4E2	O60573	11|12|2	0|0|0|0|0|0|0|0|0|0|0|0|0|0|0|0|0	8.33	83.33	0.75191	0.98	0	0.865955	TRUE
SARS2_nsp2_T85I	LMNA	P02545	16|13|10	0|0|1|1|0|0|0|0|1|0|0|2|1|1|1|1|1	13	22.1	0.837188	1	0	0.918594	TRUE
SARS2_nsp2_T85I	COX6B1	P14854	3|4|0	0|0|0|0|0|0|0|0|0|0|0|0|0|0|0|0|0	2.33	23.33	0.869444	0.66	0.04	0.764722	TRUE
SARS2_nsp2_T85I	POR	P16435	5|5|1	0|0|0|0|0|0|0|0|0|0|0|0|0|0|0|0|0	3.67	36.67	0.711855	0.67	0.03	0.690928	TRUE
SARS2_nsp2_T85I	FASN	P49327	28|22|6	0|0|0|1|0|0|0|0|0|0|0|2|4|2|1|4|4	18.67	17.63	0.645565	0.95	0.01	0.797783	TRUE
SARS2_nsp2_T85I	RAP1GDS1	P52306	15|15|9	0|0|0|0|0|0|0|0|0|0|0|0|0|0|0|0|0	13	130	0.992283	1	0	0.996141	TRUE
SARS2_nsp2_T85I	ACLY	P53396	3|6|0	0|0|0|0|0|0|0|0|0|0|0|0|0|0|0|0|0	3	30	0.746165	0.66	0.03	0.703082	TRUE
SARS2_nsp2_T85I	LMNB2	Q03252	19|18|12	0|1|1|1|0|0|0|0|1|0|0|0|0|0|0|0|0	16.33	69.42	0.657935	1	0	0.828967	TRUE
SARS2_nsp2_T85I	WASHC5	Q12768	3|3|0	0|0|0|0|0|0|0|0|0|0|0|0|0|0|0|0|0	2	20	0.877515	0.66	0.04	0.768757	TRUE
SARS2_nsp2_T85I	WASHC4	Q2M389	4|4|0	0|0|0|0|0|0|0|0|0|0|0|0|0|0|0|0|0	2.67	26.67	0.877515	0.67	0.03	0.773758	TRUE
SARS2_nsp2_T85I	FKBP15	Q5T1M5	22|22|13	0|0|0|0|0|0|0|0|0|0|0|0|0|0|0|0|0	19	190	0.99228	1	0	0.99614	TRUE
SARS2_nsp2_T85I	GIGYF2	Q6Y7W6	40|37|8	0|0|0|0|0|0|0|0|0|0|0|0|0|0|0|0|0	28.33	283.33	0.697565	1	0	0.848783	TRUE
SARS2_nsp2_T85I	VRK3	Q8IV63	4|4|4	0|0|0|0|0|0|0|0|0|0|0|0|0|0|0|0|0	4	40	0.983097	1	0	0.991549	TRUE
SARS2_nsp2_T85I	LEMD2	Q8NC56	3|6|1	0|0|0|0|0|0|0|0|0|0|0|0|0|0|0|0|0	3.33	33.33	0.778649	0.66	0.03	0.719325	TRUE
SARS2_nsp2_T85I	NA	SARS_CoV_2_nsp2	161|136|130	0|0|0|0|0|0|0|0|0|6|1|0|0|0|0|0|0	142.33	345.67	0.901046	1	0	0.950523	TRUE
SARS2_nsp2	SLC27A2	O14975	4|6|3	0|0|0|0|0|0|0|0|0|0|0|0|0|0|0|0|0	4.33	43.33	0.930259	1	0	0.96513	TRUE
SARS2_nsp2	EIF4E2	O60573	10|11|8	0|0|0|0|0|0|0|0|0|0|0|0|0|0|0|0|0	9.67	96.67	0.786737	1	0	0.893369	TRUE
SARS2_nsp2	LMNA	P02545	9|12|13	0|0|1|1|0|0|0|0|1|0|0|2|1|1|1|1|1	11.33	19.27	0.783286	1	0	0.891643	TRUE
SARS2_nsp2	COX6B1	P14854	3|3|1	0|0|0|0|0|0|0|0|0|0|0|0|0|0|0|0|0	2.33	23.33	0.97487	0.66	0.04	0.817435	TRUE
SARS2_nsp2	POR	P16435	4|3|4	0|0|0|0|0|0|0|0|0|0|0|0|0|0|0|0|0	3.67	36.67	0.712155	1	0	0.856078	TRUE
SARS2_nsp2	FASN	P49327	14|19|21	0|0|0|1|0|0|0|0|0|0|0|2|4|2|1|4|4	18	17	0.628046	1	0	0.814023	TRUE
SARS2_nsp2	RAP1GDS1	P52306	11|15|10	0|0|0|0|0|0|0|0|0|0|0|0|0|0|0|0|0	12	120	0.99322	1	0	0.99661	TRUE
SARS2_nsp2	LMNB2	Q03252	19|17|22	0|1|1|1|0|0|0|0|1|0|0|0|0|0|0|0|0	19.33	82.17	0.643773	1	0	0.821887	TRUE
SARS2_nsp2	SEPTIN2	Q15019	3|2|3	0|0|0|0|0|0|0|0|0|0|0|2|2|1|0|2|1	2.67	5.67	0.793687	0.7	0.03	0.746843	TRUE
SARS2_nsp2	WASHC4	Q2M389	3|5|3	0|0|0|0|0|0|0|0|0|0|0|0|0|0|0|0|0	3.67	36.67	0.990508	0.99	0	0.990254	TRUE
SARS2_nsp2	FKBP15	Q5T1M5	18|20|17	0|0|0|0|0|0|0|0|0|0|0|0|0|0|0|0|0	18.33	183.33	0.993686	1	0	0.996843	TRUE
SARS2_nsp2	GIGYF2	Q6Y7W6	44|31|34	0|0|0|0|0|0|0|0|0|0|0|0|0|0|0|0|0	36.33	363.33	0.736181	1	0	0.86809	TRUE
SARS2_nsp2	VRK3	Q8IV63	4|3|5	0|0|0|0|0|0|0|0|0|0|0|0|0|0|0|0|0	4	40	0.980177	1	0	0.990089	TRUE
SARS2_nsp2	LEMD2	Q8NC56	1|2|6	0|0|0|0|0|0|0|0|0|0|0|0|0|0|0|0|0	3	30	0.708487	0.65	0.05	0.679243	TRUE
SARS2_nsp2	TFG	Q92734	7|5|5	0|0|0|0|0|0|0|0|0|0|0|1|0|1|2|8|1	5.67	7.41	0.696155	0.86	0.02	0.778078	TRUE
SARS2_nsp2	NA	SARS_CoV_2_nsp2	157|173|158	0|0|0|0|0|0|0|0|0|6|1|0|0|0|0|0|0	162.67	395.05	0.895176	1	0	0.947588	TRUE

## Sheet: APMS_DDA_Quantitative
Bait	Prey_Gene	Prey_Uniprot	log2FC	SE	Tvalue	DF	pvalue	adj.pvalue	issue	MissingPercentage	ImputationPercentage
SARS2_nsp2_D23Y_R27C-SARS2_nsp2	SLC27A2	O14975	-0.0818023	0.0937769	-0.872308	4	0.432274	0.996079	NA	0.472222	0.305556
SARS2_nsp2_D23Y_R27C-SARS2_nsp2	EIF4E2	O60573	-0.445276	0.451539	-0.986128	4	0.379898	0.996079	NA	0.227273	0.227273
SARS2_nsp2_D23Y_R27C-SARS2_nsp2	POR	P16435	0.0317011	0.389794	0.0813279	4	0.939088	0.996079	NA	0.733333	0.133333
SARS2_nsp2_D23Y_R27C-SARS2_nsp2	UQCRC1	P31930	-0.235862	0.363006	-0.649746	4	0.551283	0.996079	NA	0.6	0.2
SARS2_nsp2_D23Y_R27C-SARS2_nsp2	RAP1GDS1	P52306	-0.136167	0.239404	-0.568775	4	0.599922	0.996079	NA	0.45614	0.192982
SARS2_nsp2_D23Y_R27C-SARS2_nsp2	LMNB2	Q03252	0.0571781	0.261334	0.218794	4	0.837521	0.996079	NA	0.442308	0.288462
SARS2_nsp2_D23Y_R27C-SARS2_nsp2	WASHC5	Q12768	0.719172	0.262285	2.74195	4	0.0518014	0.996079	NA	0.714286	0.285714
SARS2_nsp2_D23Y_R27C-SARS2_nsp2	WASHC4	Q2M389	0.704895	0.353778	1.99248	4	0.117118	0.996079	NA	0.452381	0.309524
SARS2_nsp2_D23Y_R27C-SARS2_nsp2	FKBP15	Q5T1M5	1.17559	0.315532	3.72573	4	0.0203724	0.996079	NA	0.496124	0.24031
SARS2_nsp2_D23Y_R27C-SARS2_nsp2	GIGYF2	Q6Y7W6	0.020997	0.311686	0.0673659	4	0.949523	0.999175	NA	0.434641	0.179739
SARS2_nsp2_D23Y_R27C-SARS2_nsp2	ZNF598	Q86UK7	0.0397459	0.331263	0.119983	4	0.910282	0.996079	NA	0.450617	0.302469
SARS2_nsp2_E63K_E66K-SARS2_nsp2	SLC27A2	O14975	-0.513901	0.169368	-3.03423	4	0.0386201	0.122132	NA	0.619048	0.333333
SARS2_nsp2_E63K_E66K-SARS2_nsp2	EIF4E2	O60573	-0.547265	0.317679	-1.7227	4	0.160044	0.338261	NA	0.361111	0.277778
SARS2_nsp2_E63K_E66K-SARS2_nsp2	POR	P16435	0.0538499	0.29236	0.18419	4	0.862825	0.920436	NA	0.759259	0.203704
SARS2_nsp2_E63K_E66K-SARS2_nsp2	UQCRC1	P31930	0.918497	0.285329	3.21908	4	0.0323086	0.106186	NA	0.333333	0.333333
SARS2_nsp2_E63K_E66K-SARS2_nsp2	RAP1GDS1	P52306	-0.163744	0.189296	-0.865014	4	0.435825	0.628546	NA	0.492063	0.301587
SARS2_nsp2_E63K_E66K-SARS2_nsp2	LMNB2	Q03252	-1.49511	0.133696	-11.1829	4	0.000364022	0.00448961	NA	0.673333	0.393333
SARS2_nsp2_E63K_E66K-SARS2_nsp2	WASHC5	Q12768	#NAME?	NA	NA	NA	NA	0	oneConditionMissing	0.833333	0
SARS2_nsp2_E63K_E66K-SARS2_nsp2	WASHC4	Q2M389	#NAME?	NA	NA	NA	NA	0	oneConditionMissing	0.7	0.1
SARS2_nsp2_E63K_E66K-SARS2_nsp2	FKBP15	Q5T1M5	-2.22554	0.188864	-11.7838	2	0.00712475	0.0340149	NA	0.717949	0.128205
SARS2_nsp2_E63K_E66K-SARS2_nsp2	GIGYF2	Q6Y7W6	-0.342112	0.313087	-1.0927	4	0.335921	0.544371	NA	0.409091	0.204545
SARS2_nsp2_E63K_E66K-SARS2_nsp2	ZNF598	Q86UK7	-0.456699	0.345397	-1.32225	4	0.256626	0.465677	NA	0.628205	0.320513
SARS2_nsp2_T85I-SARS2_nsp2	SLC27A2	O14975	-0.443603	0.24063	-1.84351	4	0.139032	0.830363	NA	0.5	0.5
SARS2_nsp2_T85I-SARS2_nsp2	EIF4E2	O60573	0.173698	0.710274	0.244551	4	0.818837	0.989981	NA	0.305556	0.222222
SARS2_nsp2_T85I-SARS2_nsp2	POR	P16435	0.155539	0.294783	0.527637	4	0.625664	0.942859	NA	0.716667	0.316667
SARS2_nsp2_T85I-SARS2_nsp2	UQCRC1	P31930	0.450049	0.669327	0.67239	4	0.538178	0.910658	NA	0.547619	0.261905
SARS2_nsp2_T85I-SARS2_nsp2	RAP1GDS1	P52306	0.361151	0.425111	0.849545	4	0.443435	0.885395	NA	0.47619	0.285714
SARS2_nsp2_T85I-SARS2_nsp2	LMNB2	Q03252	0.189612	0.197487	0.960128	4	0.391362	0.885395	NA	0.432099	0.283951
SARS2_nsp2_T85I-SARS2_nsp2	WASHC5	Q12768	0.805546	0.34007	2.36877	3	0.0986141	0.770027	NA	0.7	0.2
SARS2_nsp2_T85I-SARS2_nsp2	WASHC4	Q2M389	1.07758	0.530217	2.03233	3	0.13504	0.830363	NA	0.583333	0.138889
SARS2_nsp2_T85I-SARS2_nsp2	FKBP15	Q5T1M5	0.43053	0.4188	1.02801	4	0.362044	0.885395	NA	0.477011	0.201149
SARS2_nsp2_T85I-SARS2_nsp2	GIGYF2	Q6Y7W6	0.143323	0.794559	0.180381	4	0.865624	0.990389	NA	0.490385	0.221154
SARS2_nsp2_T85I-SARS2_nsp2	ZNF598	Q86UK7	0.0973995	0.849695	0.114629	4	0.914263	0.991146	NA	0.5	0.321429
SARS2_nsp2_G262V_G265V-SARS2_nsp2	SLC27A2	O14975	-0.110713	0.415711	-0.266321	4	0.803157	0.999998	NA	0.527778	0.194444
SARS2_nsp2_G262V_G265V-SARS2_nsp2	EIF4E2	O60573	#NAME?	NA	NA	NA	NA	0	oneConditionMissing	0.590909	0.0454545
SARS2_nsp2_G262V_G265V-SARS2_nsp2	POR	P16435	0.375176	0.147525	2.54313	4	0.0637687	0.918341	NA	0.648148	0.203704
SARS2_nsp2_G262V_G265V-SARS2_nsp2	UQCRC1	P31930	0.916099	0.311685	2.93918	4	0.0424238	0.895938	NA	0.388889	0.222222
SARS2_nsp2_G262V_G265V-SARS2_nsp2	RAP1GDS1	P52306	0.360608	0.279195	1.2916	4	0.266074	0.999998	NA	0.380952	0.285714
SARS2_nsp2_G262V_G265V-SARS2_nsp2	LMNB2	Q03252	0.449385	0.163414	2.74998	4	0.0513757	0.895938	NA	0.489899	0.186869
SARS2_nsp2_G262V_G265V-SARS2_nsp2	WASHC5	Q12768	0.369598	0.220456	1.67651	4	0.168945	0.999998	NA	0.666667	0.266667
SARS2_nsp2_G262V_G265V-SARS2_nsp2	WASHC4	Q2M389	0.509277	0.513446	0.991879	4	0.377402	0.999998	NA	0.3	0.3
SARS2_nsp2_G262V_G265V-SARS2_nsp2	FKBP15	Q5T1M5	0.514209	0.300533	1.71099	4	0.162252	0.999998	NA	0.427083	0.208333
SARS2_nsp2_G262V_G265V-SARS2_nsp2	GIGYF2	Q6Y7W6	-2.2336	0.572279	-3.903	2	0.0598159	0.895938	NA	0.654762	0.162698
SARS2_nsp2_G262V_G265V-SARS2_nsp2	ZNF598	Q86UK7	-1.63421	0.315786	-5.17505	4	0.00662889	0.783737	NA	0.75	0.326923
SARS2_nsp2_K330D_K337D-SARS2_nsp2	SLC27A2	O14975	-0.199195	0.106891	-1.86353	4	0.135844	0.436936	NA	0.69697	0.333333
SARS2_nsp2_K330D_K337D-SARS2_nsp2	EIF4E2	O60573	-1.46675	0.307468	-4.77041	4	0.00883741	0.178516	NA	0.484848	0.393939
SARS2_nsp2_K330D_K337D-SARS2_nsp2	POR	P16435	#NAME?	NA	NA	NA	NA	0	oneConditionMissing	0.833333	0
SARS2_nsp2_K330D_K337D-SARS2_nsp2	UQCRC1	P31930	-0.907034	0.311569	-2.91118	4	0.0436264	0.278906	NA	0.533333	0.333333
SARS2_nsp2_K330D_K337D-SARS2_nsp2	RAP1GDS1	P52306	0.0472711	0.269514	0.175394	4	0.869291	0.938546	NA	0.506944	0.256944
SARS2_nsp2_K330D_K337D-SARS2_nsp2	LMNB2	Q03252	-0.830367	0.114667	-7.24155	4	0.00192991	0.125986	NA	0.580645	0.322581
SARS2_nsp2_K330D_K337D-SARS2_nsp2	WASHC5	Q12768	-0.00993954	0.277259	-0.0358493	3	0.973655	0.983391	NA	0.75	0.305556
SARS2_nsp2_K330D_K337D-SARS2_nsp2	WASHC4	Q2M389	-0.529942	0.631676	-0.838945	2	0.489796	0.766967	NA	0.666667	0.2
SARS2_nsp2_K330D_K337D-SARS2_nsp2	FKBP15	Q5T1M5	-0.994199	0.13645	-7.28618	4	0.00188579	0.125986	NA	0.605556	0.272222
SARS2_nsp2_K330D_K337D-SARS2_nsp2	GIGYF2	Q6Y7W6	-1.74474	0.29708	-5.87297	4	0.00419873	0.156432	NA	0.556818	0.329545
SARS2_nsp2_K330D_K337D-SARS2_nsp2	ZNF598	Q86UK7	-1.60182	0.359916	-4.45054	4	0.011242	0.195021	NA	0.737179	0.314103

## Sheet: APMS_PRM
Protein	Bait	Log2FC	pvalue
sp|O14975|S27A2_HUMAN	SARS2_nsp2_D23Y_R27C	0.076847	0.785925
sp|O60573|IF4E2_HUMAN	SARS2_nsp2_D23Y_R27C	0.579855	0.40408
sp|P16435|NCPR_HUMAN	SARS2_nsp2_D23Y_R27C	-1.32971	0.548111
sp|P52306|GDS1_HUMAN	SARS2_nsp2_D23Y_R27C	-0.357021	0.275835
sp|Q2M389|WASC4_HUMAN	SARS2_nsp2_D23Y_R27C	2.87857	0.189693
sp|Q5T1M5|FKB15_HUMAN	SARS2_nsp2_D23Y_R27C	1.15858	0.0944847
sp|Q6Y7W6|GGYF2_HUMAN	SARS2_nsp2_D23Y_R27C	0.160714	0.452853
sp|Q86UK7|ZN598_HUMAN	SARS2_nsp2_D23Y_R27C	-0.232997	0.103983
sp|O14975|S27A2_HUMAN	SARS2_nsp2_T85I	0.0551277	0.845045
sp|O60573|IF4E2_HUMAN	SARS2_nsp2_T85I	0.542433	0.258837
sp|P16435|NCPR_HUMAN	SARS2_nsp2_T85I	-4.95866	0.030011
sp|P52306|GDS1_HUMAN	SARS2_nsp2_T85I	0.675058	0.00255853
sp|Q2M389|WASC4_HUMAN	SARS2_nsp2_T85I	3.58522	0.131017
sp|Q5T1M5|FKB15_HUMAN	SARS2_nsp2_T85I	0.867491	0.00331794
sp|Q6Y7W6|GGYF2_HUMAN	SARS2_nsp2_T85I	-2.5551	0.204165
sp|Q86UK7|ZN598_HUMAN	SARS2_nsp2_T85I	0.109583	0.776348
sp|O14975|S27A2_HUMAN	SARS2_nsp2_K330D_K337D	0.528906	0.0781709
sp|O60573|IF4E2_HUMAN	SARS2_nsp2_K330D_K337D	0.243878	0.687458
sp|P16435|NCPR_HUMAN	SARS2_nsp2_K330D_K337D	-2.1932	0.019725
sp|P52306|GDS1_HUMAN	SARS2_nsp2_K330D_K337D	0.876216	0.000297564
sp|Q2M389|WASC4_HUMAN	SARS2_nsp2_K330D_K337D	4.6513	0.0444611
sp|Q5T1M5|FKB15_HUMAN	SARS2_nsp2_K330D_K337D	0.0611475	0.624352
sp|Q6Y7W6|GGYF2_HUMAN	SARS2_nsp2_K330D_K337D	-2.46691	0.0469551
sp|Q86UK7|ZN598_HUMAN	SARS2_nsp2_K330D_K337D	-0.783558	0.00731304
sp|O14975|S27A2_HUMAN	SARS2_nsp2_G262V_G265V	-0.105395	0.776321
sp|O60573|IF4E2_HUMAN	SARS2_nsp2_G262V_G265V	-3.19035	0.0908769
sp|P16435|NCPR_HUMAN	SARS2_nsp2_G262V_G265V	-1.92359	0.114993
sp|P52306|GDS1_HUMAN	SARS2_nsp2_G262V_G265V	0.195534	0.674816
sp|Q2M389|WASC4_HUMAN	SARS2_nsp2_G262V_G265V	1.22646	0.661
sp|Q5T1M5|FKB15_HUMAN	SARS2_nsp2_G262V_G265V	0.378047	0.372774
sp|Q6Y7W6|GGYF2_HUMAN	SARS2_nsp2_G262V_G265V	-5.4739	0.000880045
sp|Q86UK7|ZN598_HUMAN	SARS2_nsp2_G262V_G265V	-1.89127	0.0106632
sp|O14975|S27A2_HUMAN	SARS2_nsp2_E63K_E66K	0.538016	0.350607
sp|O60573|IF4E2_HUMAN	SARS2_nsp2_E63K_E66K	0.701055	0.278089
sp|P16435|NCPR_HUMAN	SARS2_nsp2_E63K_E66K	0.136923	0.909883
sp|P52306|GDS1_HUMAN	SARS2_nsp2_E63K_E66K	0.309295	0.594413
sp|Q2M389|WASC4_HUMAN	SARS2_nsp2_E63K_E66K	3.99679	0.0782699
sp|Q5T1M5|FKB15_HUMAN	SARS2_nsp2_E63K_E66K	-2.45538	0.0029371
sp|Q6Y7W6|GGYF2_HUMAN	SARS2_nsp2_E63K_E66K	-0.68214	0.61029
sp|Q86UK7|ZN598_HUMAN	SARS2_nsp2_E63K_E66K	0.103195	0.874852
